# Supplementary material for: Quantification of tunicamycin-induced protein expression and N-glycosylation changes in yeast
Source: Royal Society of Chemistry journal article supplement (doi:10.1039/c6an00144k), 2016-01-01
Supplement: c6an00144k2.xlsx [file c6an00144k2.xlsx]

## Sheet: Unique Proteins
Table S-4. Quantified Proteins (4259) in Tunicamycin-Treated Yeast Cells
Gene Symbol	Reference	SGD ID	PPM	XCorr	Protein H/L ratio	Unique peptide hits	Annotation
SSA1	YAL005C	S000000004	0.78	3.436	1.50504	51	ATPase involved in protein folding and nuclear localization signal (NLS)-directed nuclear transport; member of heat shock protein 70 (HSP70) family; forms a chaperone complex with Ydj1p; localized to the nucleus, cytoplasm, and cell wall
ERP2	YAL007C	S000000005	-1.36	2.252	1.76516	7	Protein that forms a heterotrimeric complex with Erp1p, Emp24p, and Erv25p; member, along with Emp24p and Erv25p, of the p24 family involved in ER to Golgi transport and localized to COPII-coated vesicles
MDM10	YAL010C	S000000008	-0.72	1.808	1.49506	5	Subunit of both the Mdm10-Mdm12-Mmm1 complex and the mitochondrial sorting and assembly machinery (SAM complex); functions in both the general and Tom40p-specific pathways for import and assembly of outer membrane beta-barrel proteins
CYS3	YAL012W	S000000010	1.19	1.885	1.09703	15	Cystathionine gamma-lyase, catalyzes one of the two reactions involved in the transsulfuration pathway that yields cysteine from homocysteine with the intermediary formation of cystathionine
DEP1	YAL013W	S000000011	1.16	2.497	0.940696	6	Transcriptional modulator involved in regulation of structural phospholipid biosynthesis genes and metabolically unrelated genes, as well as maintenance of telomeres, mating efficiency, and sporulation
SYN8	YAL014C	S000000012	-0.38	2.083	1.12732	3	Endosomal SNARE related to mammalian syntaxin 8
TPD3	YAL016W	S000000014	0.27	3.851	1.04726	24	Regulatory subunit A of the heterotrimeric protein phosphatase 2A, which also contains regulatory subunit Cdc55p and either catalytic subunit Pph21p or Pph22p; required for cell morphogenesis and for transcription by RNA polymerase III
PSK1	YAL017W	S000000015	-0.24	1.185	1.60125	35	One of two (see also PSK2) PAS domain containing S/T protein kinases; coordinately regulates protein synthesis and carbohydrate metabolism and storage in response to a unknown metabolite that reflects nutritional status
FUN30	YAL019W	S000000017	-0.34	2.507	1.0823	13	Protein whose overexpression affects chromosome stability, potential Cdc28p substrate; homolog of Snf2p; the authentic, non-tagged protein is detected in highly purified mitochondria in high-throughput studies
ATS1	YAL020C	S000000018	-0.02	2.421	0.702344	4	Protein required, with Elongator complex, Kti11p, and Kti12p, for modification of wobble nucleosides in tRNA; has a potential role in regulatory interactions between microtubules and the cell cycle
CCR4	YAL021C	S000000019	0.79	2.389	0.974207	26	Component of the CCR4-NOT transcriptional complex, which is involved in regulation of gene expression; component of the major cytoplasmic deadenylase, which is involved in mRNA poly(A) tail shortening
FUN26	YAL022C	S000000020	0.37	1.475	0.841509	8	Nucleoside transporter with broad nucleoside selectivity; localized to intracellular membranes
PMT2	YAL023C	S000000021	1.98	2.128	1.14409	23	Protein O-mannosyltransferase, transfers mannose residues from dolichyl phosphate-D-mannose to protein serine/threonine residues; acts in a complex with Pmt1p, can instead interact with Pmt5p in some conditions; target for new antifungals
LTE1	YAL024C	S000000022	-1.19	3.146	1.18026	10	Putative GDP/GTP exchange factor required for mitotic exit at low temperatures; acts as a guanine nucleotide exchange factor (GEF) for Tem1p, which is a key regulator of mitotic exit; physically associates with Ras2p-GTP
MAK16	YAL025C	S000000023	-0.41	1.518	0.378168	6	Essential nuclear protein, constituent of 66S pre-ribosomal particles; required for maturation of 25S and 5.8S rRNAs; required for maintenance of M1 satellite double-stranded RNA of the L-A virus
DRS2	YAL026C	S000000024	-0.04	1.101	0.905932	22	Aminophospholipid translocase (flippase) that maintains membrane lipid asymmetry in post-Golgi secretory vessicles; contributes to clathrin-coated vesicle formation and endocytosis; mutations in human homolog ATP8B1 result in liver disease
SAW1	YAL027W	S000000025	-0.1	2.245	1.47228	4	Catalyzes 3'-nonhomologous tail removal of Rad1p/Rad10p-dependent single-strand annealing recombination intermediates; green fluorescent protein (GFP)-fusion protein localizes to the nucleus; YAL027W is a non-essential gene
MYO4	YAL029C	S000000027	-3.31	2.929	1.27176	32	One of two type V myosin motors (along with MYO2) involved in actin-based transport of cargos; required for mRNA transport, including ASH1 mRNA, and facilitating the growth and movement of ER tubules into the growing bud along with She3p
SNC1	YAL030W	S000000028	0.5	2.989	1.20643	2	Vesicle membrane receptor protein (v-SNARE) involved in the fusion between Golgi-derived secretory vesicles with the plasma membrane; proposed to be involved in endocytosis; member of the synaptobrevin/VAMP family of R-type v-SNARE proteins
GIP4	YAL031C	S000000029	0.23	4.032	1.55154	5	Cytoplasmic Glc7-interacting protein whose overexpression relocalizes Glc7p from the nucleus and prevents chromosome segregation; potential Cdc28p substrate
PRP45	YAL032C	S000000030	-0.11	3.136	0.700302	3	Protein required for pre-mRNA splicing; associates with the spliceosome and interacts with splicing factors Prp22p and Prp46p; orthologous to human transcriptional coactivator SKIP and can activate transcription of a reporter gene
POP5	YAL033W	S000000031	0.7	1.903	0.573116	5	Subunit of both RNase MRP, which cleaves pre-rRNA, and nuclear RNase P, which cleaves tRNA precursors to generate mature 5' ends
FUN19	YAL034C	S000002134	-2.47	2.821	17.079	6	Non-essential protein of unknown function
MTW1	YAL034W-A	S000000032	-1.02	1.465	0.86811	6	Essential component of the MIND kinetochore complex (Mtw1p Including Nnf1p-Nsl1p-Dsn1p) which joins kinetochore subunits contacting DNA to those contacting microtubules; critical to kinetochore assembly
FUN12	YAL035W	S000000033	-0.38	1.988	0.835566	38	GTPase, required for general translation initiation by promoting Met-tRNAiMet binding to ribosomes and ribosomal subunit joining; homolog of bacterial IF2
RBG1	YAL036C	S000000034	-0.36	1.722	0.840663	17	Member of the DRG family of GTP-binding proteins; interacts with translating ribosomes and with Tma46p
CDC19	YAL038W	S000000036	0.67	1.87	0.954588	50	Pyruvate kinase, functions as a homotetramer in glycolysis to convert phosphoenolpyruvate to pyruvate, the input for aerobic (TCA cycle) or anaerobic (glucose fermentation) respiration
CYC3	YAL039C	S000000037	0.84	1.703	1.17381	2	Cytochrome c heme lyase (holocytochrome c synthase), attaches heme to apo-cytochrome c (Cyc1p or Cyc7p) in the mitochondrial intermembrane space; human ortholog may have a role in microphthalmia with linear skin defects (MLS)
CDC24	YAL041W	S000000039	-0.12	2.019	1.71196	16	Guanine nucleotide exchange factor (GEF or GDP-release factor) for Cdc42p; required for polarity establishment and maintenance, and mutants have morphological defects in bud formation and shmooing
ERV46	YAL042W	S000000040	-0.64	3.067	0.67124	8	Protein localized to COPII-coated vesicles, forms a complex with Erv41p; involved in the membrane fusion stage of transport
PTA1	YAL043C	S000000041	0.2	4.79	1.08121	24	Subunit of holo-CPF, a multiprotein complex and functional homolog of mammalian CPSF, required for the cleavage and polyadenylation of mRNA and snoRNA 3' ends; involved in pre-tRNA processing; binds to the phosphorylated CTD of RNAPII
GCV3	YAL044C	S000000042	-0.02	1.313	0.661013	4	H subunit of the mitochondrial glycine decarboxylase complex, required for the catabolism of glycine to 5,10-methylene-THF; expression is regulated by levels of levels of 5,10-methylene-THF in the cytoplasm
YAL044W-A	YAL044W-A	S000007586	-0.44	2.49	1.85755	2	Putative protein of unknown function; similar to S. pombe uvi31 which is a putative DNA repair protein
YAL046C	YAL046C	S000000044	1.85	4.961	1.16554	3	Putative protein of unknown function; null mutant displays increased frequency of mitochondrial genome loss (petite formation)
SPC72	YAL047C	S000000045	-0.07	2.735	0.972318	3	Component of the cytoplasmic Tub4p (gamma-tubulin) complex, binds spindle pole bodies and links them to microtubules; has roles in astral microtubule formation and stabilization
GEM1	YAL048C	S000000046	0.26	3.988	1.62046	6	Evolutionarily-conserved tail-anchored outer mitochondrial membrane GTPase which regulates mitochondrial morphology; cells lacking Gem1p contain collapsed, globular, or grape-like mitochondria; not required for pheromone-induced cell death
YAL049C	YAL049C	S000000047	-0.44	2.413	1.31244	12	Cytoplasmic protein of unknown function, potential Hsp82p interactor; null mutant displays decreased frequency of mitochondrial genome loss (petite formation)
OAF1	YAL051W	S000000048	-1.02	1.217	0.9531	10	Oleate-activated transcription factor, acts alone and as a heterodimer with Pip2p; activates genes involved in beta-oxidation of fatty acids and peroxisome organization and biogenesis
FLC2	YAL053W	S000000049	0.04	1.55	2.64075	14	Putative FAD transporter; required for uptake of FAD into endoplasmic reticulum; involved in cell wall maintenance
ACS1	YAL054C	S000000050	-0.73	3.751	13.3674	2	Acetyl-coA synthetase isoform which, along with Acs2p, is the nuclear source of acetyl-coA for histone acetlyation; expressed during growth on nonfermentable carbon sources and under aerobic conditions
PEX22	YAL055W	S000000051	-1.35	2.697	1.24263	4	Putative peroxisomal membrane protein required for import of peroxisomal proteins, functionally complements a Pichia pastoris pex22 mutation
GPB2	YAL056W	S000000052	2.84	2.348	1.65933	3	Multistep regulator of cAMP-PKA signaling; inhibits PKA downstream of Gpa2p and Cyr1p, thereby increasing cAMP dependency; inhibits Ras activity through direct interactions with Ira1p/2p; regulated by G-alpha protein Gpa2p; homolog of Gpb1p
CNE1	YAL058W	S000000054	0.99	2.515	0.699381	6	Calnexin; integral membrane ER chaperone involved in folding and quality control of glycoproteins; chaperone activity is inhibited by Mpd1p, with which Cne1p interacts; 24% identical to mammalian calnexin; Ca+ binding not yet shown in yeast
ECM1	YAL059W	S000000055	1.49	2.77	0.246217	3	Protein of unknown function, localized in the nucleoplasm and the nucleolus, genetically interacts with MTR2 in 60S ribosomal protein subunit export
BDH1	YAL060W	S000000056	-0.61	1.762	0.973532	12	NAD-dependent (R,R)-butanediol dehydrogenase, catalyzes oxidation of (R,R)-2,3-butanediol to (3R)-acetoin, oxidation of meso-butanediol to (3S)-acetoin, and reduction of acetoin; enhances use of 2,3-butanediol as an aerobic carbon source
BDH2	YAL061W	S000000057	0.02	1.562	0.78491	6	Putative medium-chain alcohol dehydrogenase with similarity to BDH1; transcription induced by constitutively active PDR1 and PDR3; BDH2 is an essential gene
GDH3	YAL062W	S000000058	-0.36	3.758	1.25458	9	NADP(+)-dependent glutamate dehydrogenase, synthesizes glutamate from ammonia and alpha-ketoglutarate; rate of alpha-ketoglutarate utilization differs from Gdh1p; expression regulated by nitrogen and carbon sources
ERP1	YAR002C-A	S000002129	0.24	1.798	1.45216	7	Protein that forms a heterotrimeric complex with Erp2p, Emp24p, and Erv25p; member, along with Emp24p and Erv25p, of the p24 family involved in ER to Golgi transport and localized to COPII-coated vesicles
NUP60	YAR002W	S000000063	-0.13	3.361	0.824791	20	Subunit of the nuclear pore complex (NPC), functions to anchor Nup2p to the NPC in a process controlled by the nucleoplasmic concentration of Gsp1p-GTP; potential Cdc28p substrate; involved in telomere maintenance
SWD1	YAR003W	S000000064	0.67	1.723	1.25889	4	Subunit of the COMPASS (Set1C) complex, which methylates histone H3 on lysine 4 and is required in transcriptional silencing near telomeres; WD40 beta propeller superfamily member with similarity to mammalian Rbbp7
RFA1	YAR007C	S000000065	0.63	3.347	0.899285	26	Subunit of heterotrimeric Replication Protein A (RPA), which is a highly conserved single-stranded DNA binding protein involved in DNA replication, repair, and recombination
YAR009C	YAR009C	S000000067	1.36	2.421	0.530123	37	Retrotransposon TYA Gag and TYB Pol genes; in YARCTY1-1 TYB is mutant and probably non-functional
YAR010C	YAR010C	S000000068	0.67	1.367	0.748047	15	Retrotransposon TYA Gag gene co-transcribed with TYB Pol; in YARCTY1-1 TYB is mutant and probably non-functional
BUD14	YAR014C	S000000069	-1.07	1.327	0.500867	7	Protein involved in bud-site selection, Bud14p-Glc7p complex functions as a cortical regulator of dynein; diploid mutants display a random budding pattern instead of the wild-type bipolar pattern
ADE1	YAR015W	S000000070	-0.4	1.709	0.813774	19	N-succinyl-5-aminoimidazole-4-carboxamide ribotide (SAICAR) synthetase, required for 'de novo' purine nucleotide biosynthesis; red pigment accumulates in mutant cells deprived of adenine
CDC15	YAR019C	S000000072	0.1	3.504	1.78197	6	Protein kinase of the Mitotic Exit Network that is localized to the spindle pole bodies at late anaphase; promotes mitotic exit by directly switching on the kinase activity of Dbf2p
YAR028W	YAR028W	S000000076	-0.5	2.902	0.702563	3	Putative integral membrane protein, member of DUP240 gene family; GFP-fusion protein is induced in response to the DNA-damaging agent MMS
PRM9	YAR031W	S000000078	-0.13	1.518	3.33665	3	Pheromone-regulated protein with 3 predicted transmembrane segments and an FF sequence, a motif involved in COPII binding; member of DUP240 gene family
MST28	YAR033W	S000000079	-1.69	2.345	1.02972	6	Putative integral membrane protein, involved in vesicle formation; forms complex with Mst27p; member of DUP240 gene family; binds COPI and COPII vesicles
SWH1	YAR042W	S000000081	0	3.453	1.20226	24	Protein similar to mammalian oxysterol-binding protein; contains ankyrin repeats; localizes to the Golgi and the nucleus-vacuole junction
PHO11	YAR071W	S000000094	0.43	1.625	0.283811	3	One of three repressible acid phosphatases, a glycoprotein that is transported to the cell surface by the secretory pathway; induced by phosphate starvation and coordinately regulated by PHO4 and PHO2
IMD1	YAR073W	S000000095	0.71	2.147	0.71529	7	Nonfunctional protein with homology to IMP dehydrogenase; probable pseudogene, located close to the telomere; is not expressed at detectable levels; YAR073W and YAR075W comprise a continuous reading frame in some strains of S. cerevisiae
YAR075W	YAR075W	S000002145	1.09	3.849	0.76395	4	Non-functional protein with homology IMP dehydrogenase; YAR073W/IMD1 and YAR075W comprise a continuous reading frame in some strains of S. cerevisiae.
ECM15	YBL001C	S000000097	-2.07	2.566	0.856604	3	Non-essential protein of unknown function, likely exists as tetramer, may be regulated by the binding of small-molecule ligands (possibly sulfate ions), may have a role in yeast cell-wall biogenesis
HTB2	YBL002W	S000000098	-0.5	1.605	0.683553	10	One of two nearly identical (see HTB1) histone H2B subtypes required for chromatin assembly and chromosome function; Rad6p-Bre1p-Lge1p mediated ubiquitination regulates transcriptional activation, meiotic DSB formation and H3 methylation
HTA2	YBL003C	S000000099	-0.25	2.136	0.650445	5	One of two nearly identical (see also HTA1) histone H2A subtypes; core histone required for chromatin assembly and chromosome function; DNA damage-dependent phosphorylation by Mec1p facilitates DNA repair; acetylated by Nat4p
UTP20	YBL004W	S000000100	0.21	1.694	0.744116	59	Component of the small-subunit (SSU) processome, which is involved in the biogenesis of the 18S rRNA
YBL005W-A	YBL005W-A	S000002146	-1.24	2.553	0.386168	7	Retrotransposon TYA Gag gene co-transcribed with TYB Pol; translated as TYA or TYA-TYB polyprotein; Gag is a nucleocapsid protein that is the structural constituent of virus-like particles (VLPs); similar to retroviral Gag
YBL005W-B	YBL005W-B	S000002147	-0.25	1.778	0.462941	13	Retrotransposon TYA Gag and TYB Pol genes; transcribed/translated as one unit; polyprotein is processed to make a nucleocapsid-like protein (Gag), reverse transcriptase (RT), protease (PR), and integrase (IN); similar to retroviral genes
SLA1	YBL007C	S000000103	0.39	4.644	0.973937	31	Cytoskeletal protein binding protein required for assembly of the cortical actin cytoskeleton; interacts with proteins regulating actin dynamics and proteins required for endocytosis; found in the nucleus and cell cortex; has 3 SH3 domains
HIR1	YBL008W	S000000104	0.82	2.501	1.13104	10	Subunit of the HIR complex, a nucleosome assembly complex involved in regulation of histone gene transcription; contributes to nucleosome formation, heterochromatic gene silencing, and formation of functional kinetochores
YBL010C	YBL010C	S000000106	-0.79	1.942	0.640114	2	Putative protein of unknown function; green fluorescent protein (GFP)-fusion protein colocalizes with clathrin-coated vesicles
SCT1	YBL011W	S000000107	-0.72	3.905	1.21071	10	Glycerol 3-phosphate/dihydroxyacetone phosphate dual substrate-specific sn-1 acyltransferase of the glycerolipid biosynthesis pathway, prefers 16-carbon fatty acids, similar to Gpt2p, gene is constitutively transcribed
ACH1	YBL015W	S000000111	-0.23	2.194	1.22217	22	Acetyl-coA hydrolase, primarily localized to mitochondria; phosphorylated; required for acetate utilization and for diploid pseudohyphal growth
FUS3	YBL016W	S000000112	0.21	2.535	0.761518	8	Mitogen-activated serine/threonine protein kinase involved in mating; phosphoactivated by Ste7p; substrates include Ste12p, Far1p, Bni1p, Sst2p; inhibits invasive growth during mating by phosphorylating Tec1p, promoting its degradation
PEP1	YBL017C	S000000113	0.1	1.83	1.05599	46	Type I transmembrane sorting receptor for multiple vacuolar hydrolases; cycles between the late-Golgi and prevacuolar endosome-like compartments
POP8	YBL018C	S000000114	-0.7	2.305	0.746622	4	Subunit of both RNase MRP, which cleaves pre-rRNA, and nuclear RNase P, which cleaves tRNA precursors to generate mature 5' ends
APN2	YBL019W	S000000115	0.03	1.414	0.908085	3	Class II abasic (AP) endonuclease involved in repair of DNA damage; homolog of human HAP1 and E. coli exoIII
PIM1	YBL022C	S000000118	-0.87	2.11	1.35032	35	ATP-dependent Lon protease, involved in degradation of misfolded proteins in mitochondria; required for biogenesis and maintenance of mitochondria
MCM2	YBL023C	S000000119	-0.89	3.724	0.782683	19	Protein involved in DNA replication; component of the Mcm2-7 hexameric complex that binds chromatin as a part of the pre-replicative complex
NCL1	YBL024W	S000000120	0.28	2.309	0.820685	41	S-adenosyl-L-methionine-dependent tRNA: m5C-methyltransferase, methylates cytosine to m5C at several positions in tRNAs and intron-containing pre-tRNAs; similar to Nop2p and human proliferation associated nucleolar protein p120
RRN10	YBL025W	S000000121	-0.51	3.028	0.59847	4	Protein involved in promoting high level transcription of rDNA, subunit of UAF (upstream activation factor) for RNA polymerase I
LSM2	YBL026W	S000000122	-0.23	1.721	0.794875	5	Lsm (Like Sm) protein; part of heteroheptameric complexes (Lsm2p-7p and either Lsm1p or 8p): cytoplasmic Lsm1p complex involved in mRNA decay; nuclear Lsm8p complex part of U6 snRNP and possibly involved in processing tRNA, snoRNA, and rRNA
RPL19B	YBL027W	S000000123	0.28	2.086	0.624252	16	Protein component of the large (60S) ribosomal subunit, nearly identical to Rpl19Ap and has similarity to rat L19 ribosomal protein; rpl19a and rpl19b single null mutations result in slow growth, while the double null mutation is lethal
YBL028C	YBL028C	S000000124	-0.04	1.256	0.259256	2	Protein of unknown function that may interact with ribosomes; green fluorescent protein (GFP)-fusion protein localizes to the nucleolus; predicted to be involved in ribosome biogenesis
YBL029C-A	YBL029C-A	S000007591	-0.89	2.515	3.31016	3	Protein of unknown function; green fluorescent protein (GFP)-fusion protein localizes to the cell periphery; has potential orthologs in Saccharomyces species and in Yarrowia lipolytica
PET9	YBL030C	S000000126	0.61	2.537	2.15793	28	Major ADP/ATP carrier of the mitochondrial inner membrane, exchanges cytosolic ADP for mitochondrially synthesized ATP; phosphorylated; required for viability in many common lab strains carrying a mutation in the polymorphic SAL1 gene
SHE1	YBL031W	S000000127	-0.22	2.644	0.838917	1	Cytoskeletal protein of unknown function; overexpression causes growth arrest
HEK2	YBL032W	S000000128	1.25	2.274	0.703075	18	RNA binding protein with similarity to hnRNP-K that localizes to the cytoplasm and to subtelomeric DNA; required for the proper localization of ASH1 mRNA; involved in the regulation of telomere position effect and telomere length
RIB1	YBL033C	S000000129	-1.47	4.064	1.2544	12	GTP cyclohydrolase II; catalyzes the first step of the riboflavin biosynthesis pathway
STU1	YBL034C	S000000130	0.15	2.627	1.59146	16	Component of the mitotic spindle that binds to interpolar microtubules via its association with beta-tubulin (Tub2p); required for interpolar microtubules to provide an outward force on the spindle poles
POL12	YBL035C	S000000131	-0.49	2.869	1.11613	11	B subunit of DNA polymerase alpha-primase complex, required for initiation of DNA replication during mitotic and premeiotic DNA synthesis; also functions in telomere capping and length regulation
YBL036C	YBL036C	S000000132	-0.22	2.82	1.03154	13	Single-domain racemase, possibly non-specific due to the lack of the second domain, which presumably determines specificity; GFP-fusion protein expression is induced in response to the DNA-damaging agent MMS
APL3	YBL037W	S000000133	1.7	2.897	1.31731	21	Alpha-adaptin, large subunit of the clathrin associated protein complex (AP-2); involved in vesicle mediated transport
MRPL16	YBL038W	S000000134	-0.64	1.846	1.08726	3	Mitochondrial ribosomal protein of the large subunit
URA7	YBL039C	S000000135	-0.47	1.456	0.685772	26	Major CTP synthase isozyme (see also URA8), catalyzes the ATP-dependent transfer of the amide nitrogen from glutamine to UTP, forming CTP, the final step in de novo biosynthesis of pyrimidines; involved in phospholipid biosynthesis
ERD2	YBL040C	S000000136	0.01	2.064	2.54101	3	HDEL receptor, an integral membrane protein that binds to the HDEL motif in proteins destined for retention in the endoplasmic reticulum; has a role in maintenance of normal levels of ER-resident proteins
PRE7	YBL041W	S000000137	-0.17	2.798	1.04257	8	Beta 6 subunit of the 20S proteasome
FUI1	YBL042C	S000000138	-2.45	1.816	0.0725214	4	High affinity uridine permease, localized to the plasma membrane; not involved in uracil transport
COR1	YBL045C	S000000141	-0.35	5.728	1.24773	23	Core subunit of the ubiquinol-cytochrome c reductase complex (bc1 complex), which is a component of the mitochondrial inner membrane electron transport chain
PSY4	YBL046W	S000000142	0.15	1.811	0.698509	4	Putative regulatory subunit of an evolutionarily conserved protein phosphatase complex containing the catalytic subunit Pph3p and a third subunit Psy2p; required for cisplatin resistance; GFP-fusion protein localizes to the nucleus
EDE1	YBL047C	S000000143	1.06	2.797	0.723718	41	Key endocytic protein involved in a network of interactions with other endocytic proteins, binds membranes in a ubiquitin-dependent manner, may also bind ubiquitinated membrane-associated proteins
MOH1	YBL049W	S000000145	-0.71	2.419	32.6011	2	Protein of unknown function, has homology to kinase Snf7p; not required for growth on nonfermentable carbon sources; essential for viability in stationary phase
SEC17	YBL050W	S000000146	0.71	3.811	1.36893	10	Peripheral membrane protein required for vesicular transport between ER and Golgi and for the 'priming' step in homotypic vacuole fusion, part of the cis-SNARE complex; has similarity to alpha-SNAP
PIN4	YBL051C	S000000147	-0.71	2.225	0.890384	14	Protein involved in G2/M phase progression and response to DNA damage, interacts with Rad53p; contains an RNA recognition motif, a nuclear localization signal, and several SQ/TQ cluster domains; hyperphosphorylated in response to DNA damage
YBL054W	YBL054W	S000000150	-1.26	1.494	0.153584	6	Protein of unknown function involved in rRNA and ribosome biosynthesis
YBL055C	YBL055C	S000000151	1	2.628	1.06282	9	3'-->5' exonuclease and endonuclease with a possible role in apoptosis; has similarity to mammalian and C. elegans apoptotic nucleases
PTC3	YBL056W	S000000152	-4.66	2.529	0.847685	9	Type 2C protein phosphatase; dephosphorylates Hog1p (see also Ptc2p) to limit maximal kinase activity induced by osmotic stress; dephosphorylates T169 phosphorylated Cdc28p (see also Ptc2p); role in DNA checkpoint inactivation
PTH2	YBL057C	S000000153	-0.39	1.771	0.925144	8	One of two (see also PTH1) mitochondrially-localized peptidyl-tRNA hydrolases; negatively regulates the ubiquitin-proteasome pathway via interactions with ubiquitin-like ubiquitin-associated proteins; dispensable for cell growth
SHP1	YBL058W	S000000154	-0.84	4.92	0.858982	16	UBX (ubiquitin regulatory X) domain-containing protein that regulates Glc7p phosphatase activity and interacts with Cdc48p; interacts with ubiquitylated proteins in vivo and is required for degradation of a ubiquitylated model substrate
YBL059C-A	YBL059C-A	S000007488	-0.75	3.835	0.825878	3	Putative protein of unknown function; contains twin Cx9C motifs that can form coiled coil-helix-coiled-coil helix fold; green fluorescent protein (GFP)-fusion protein localizes to the cytoplasm and nucleus
YBL059W	YBL059W	S000000155	-0.37	2.874	1.99612	2	Putative protein of unknown function; the authentic, non-tagged protein is detected in highly purified mitochondria in high-throughput studies
YEL1	YBL060W	S000000156	3.03	2.392	1.35341	3	Guanine nucleotide exchange factor specific for Arf3p; localized to the bud neck and tip; required for localization of Arf3p to the bud neck and tip
SKT5	YBL061C	S000000157	-1.7	2.413	1.04652	7	Activator of Chs3p (chitin synthase III), recruits Chs3p to the bud neck via interaction with Bni4p; has similarity to Shc1p, which activates Chs3p during sporulation
KIP1	YBL063W	S000000159	-0.74	3.031	3.05739	3	Kinesin-related motor protein required for mitotic spindle assembly and chromosome segregation; functionally redundant with Cin8p
PRX1	YBL064C	S000000160	-1.01	2.211	3.44356	11	Mitochondrial peroxiredoxin (1-Cys Prx) with thioredoxin peroxidase activity, has a role in reduction of hydroperoxides; induced during respiratory growth and under conditions of oxidative stress; phosphorylated
SEF1	YBL066C	S000000162	-2.32	2.176	1.58321	12	Putative transcription factor, has homolog in Kluyveromyces lactis
UBP13	YBL067C	S000000163	-1.1	2.565	0.939262	7	Putative ubiquitin carboxyl-terminal hydrolase, ubiquitin-specific protease that cleaves ubiquitin-protein fusions
PRS4	YBL068W	S000000164	2.85	4.501	0.677222	13	5-phospho-ribosyl-1(alpha)-pyrophosphate synthetase, synthesizes PRPP, which is required for nucleotide, histidine, and tryptophan biosynthesis; one of five related enzymes, which are active as heteromultimeric complexes
YBL068W-A	YBL068W-A	S000028530	-1.3	2.85	0.722315	3	Dubious open reading frame unlikely to encode a protein; identified by fungal homology and RT-PCR
AST1	YBL069W	S000000165	-3.42	2.813	0.524567	8	Peripheral membrane protein that interacts with the plasma membrane ATPase Pma1p and has a role in its targeting to the plasma membrane, possibly by influencing its incorporation into lipid rafts
RPS8A	YBL072C	S000000168	-1.11	2.59	0.591316	13	Protein component of the small (40S) ribosomal subunit; identical to Rps8Bp and has similarity to rat S8 ribosomal protein
AAR2	YBL074C	S000000170	-0.03	2.599	1.64821	3	Component of the U5 snRNP, required for splicing of U3 precursors; originally described as a splicing factor specifically required for splicing pre-mRNA of the MATa1 cistron
SSA3	YBL075C	S000000171	-0.47	2.664	7.33044	11	ATPase involved in protein folding and the response to stress; plays a role in SRP-dependent cotranslational protein-membrane targeting and translocation; member of the heat shock protein 70 (HSP70) family; localized to the cytoplasm
ILS1	YBL076C	S000000172	-0.1	2.818	0.751633	61	Cytoplasmic isoleucine-tRNA synthetase, target of the G1-specific inhibitor reveromycin A
ATG8	YBL078C	S000000174	-0.47	4.118	3.06078	6	Conserved protein that is a component of autophagosomes and Cvt vesicles; undergoes C-terminal conjugation to phosphatidylethanolamine (PE), Atg8p-PE is anchored to membranes and may mediate membrane fusion during autophagosome formation
NUP170	YBL079W	S000000175	1.94	4.811	1.20899	32	Abundant subunit of the nuclear pore complex (NPC), required for proper localization of specific nucleoporins within the NPC, involved in nuclear envelope permeability and in chromosome segregation, has similarity to Nup157p
PET112	YBL080C	S000000176	0.28	2.141	1.31832	7	Protein required for mitochondrial translation; mutation is functionally complemented by a Bacillus subtilis ortholog
YBL081W	YBL081W	S000000177	-2.36	2.06	0.104317	2	Non-essential protein of unknown function
ALG3	YBL082C	S000000178	0.72	1.536	0.892238	3	Dolichol-P-Man dependent alpha(1-3) mannosyltransferase, involved in the synthesis of dolichol-linked oligosaccharide donor for N-linked glycosylation of proteins
CDC27	YBL084C	S000000180	-0.9	2.713	0.855595	4	Subunit of the Anaphase-Promoting Complex/Cyclosome (APC/C), which is a ubiquitin-protein ligase required for degradation of anaphase inhibitors, including mitotic cyclins, during the metaphase/anaphase transition
BOI1	YBL085W	S000000181	-0.89	1.118	0.759883	16	Protein implicated in polar growth, functionally redundant with Boi2p; interacts with bud-emergence protein Bem1p; contains an SH3 (src homology 3) domain and a PH (pleckstrin homology) domain
YBL086C	YBL086C	S000000182	3.03	3.252	0.773541	4	Protein of unknown function; green fluorescent protein (GFP)-fusion protein localizes to the cell periphery
RPL23A	YBL087C	S000000183	0.58	1.56	0.636001	13	Protein component of the large (60S) ribosomal subunit, identical to Rpl23Bp and has similarity to E. coli L14 and rat L23 ribosomal proteins
MAP2	YBL091C	S000000187	-1.82	1.826	0.852015	20	Methionine aminopeptidase, catalyzes the cotranslational removal of N-terminal methionine from nascent polypeptides; function is partially redundant with that of Map1p
SCS22	YBL091C-A	S000007228	0.4	1.762	1.56949	1	Protein involved in regulation of phospholipid metabolism; homolog of Scs2p; similar to D. melanogaster inturned protein
RPL32	YBL092W	S000000188	1.22	1.015	0.631991	14	Protein component of the large (60S) ribosomal subunit, has similarity to rat L32 ribosomal protein; overexpression disrupts telomeric silencing
ROX3	YBL093C	S000000189	-0.69	1.33	1.54168	2	Subunit of the RNA polymerase II mediator complex; associates with core polymerase subunits to form the RNA polymerase II holoenzyme
YBL095W	YBL095W	S000000191	-0.42	1.539	7.59263	2	Putative protein of unknown function; the authentic, non-tagged protein is detected in highly purified mitochondria in high-throughput studies
BRN1	YBL097W	S000000193	-0.35	1.91	1.04108	8	Essential protein required for chromosome condensation, likely to function as an intrinsic component of the condensation machinery, may influence multiple aspects of chromosome transmission and dynamics
BNA4	YBL098W	S000000194	-0.64	1.495	1.26905	12	Kynurenine 3-mono oxygenase, required for the de novo biosynthesis of NAD from tryptophan via kynurenine; expression regulated by Hst1p; putative therapeutic target for Huntington disease
ATP1	YBL099W	S000000195	-0.08	3.71	1.15221	31	Alpha subunit of the F1 sector of mitochondrial F1F0 ATP synthase, which is a large, evolutionarily conserved enzyme complex required for ATP synthesis; phosphorylated
YBL100W-A	YBL100W-A	S000002148	0.2	1.569	6.75755	9	Retrotransposon TYA Gag gene co-transcribed with TYB Pol; translated as TYA or TYA-TYB polyprotein; Gag is a nucleocapsid protein that is the structural constituent of virus-like particles (VLPs); similar to retroviral Gag
YBL100W-B	YBL100W-B	S000002149	1.45	1.474	3.76044	15	Retrotransposon TYA Gag and TYB Pol genes; transcribed/translated as one unit; polyprotein is processed to make a nucleocapsid-like protein (Gag), reverse transcriptase (RT), protease (PR), and integrase (IN); similar to retroviral genes
ECM21	YBL101C	S000000197	0.08	2.657	1.90462	18	Non-essential protein of unknown function; promoter contains several Gcn4p binding elements
SFT2	YBL102W	S000000198	0.15	2.293	1.03724	5	Non-essential tetra-spanning membrane protein found mostly in the late Golgi, can suppress some sed5 alleles; may be part of the transport machinery, but precise function is unknown; similar to mammalian syntaxin 5
RTG3	YBL103C	S000000199	-2.09	3.168	0.998199	10	Basic helix-loop-helix-leucine zipper (bHLH/Zip) transcription factor that forms a complex with another bHLH/Zip protein, Rtg1p, to activate the retrograde (RTG) and TOR pathways
YBL104C	YBL104C	S000000200	0.34	1.494	1.16878	13	Putative protein of unknown function, promoter contains multiple GCN4 binding sites
PKC1	YBL105C	S000000201	-0.63	3.216	1.53733	26	Protein serine/threonine kinase essential for cell wall remodeling during growth; localized to sites of polarized growth and the mother-daughter bud neck; homolog of the alpha, beta, and gamma isoforms of mammalian protein kinase C (PKC)
SRO77	YBL106C	S000000202	-1.56	1.347	0.374127	6	Protein with roles in exocytosis and cation homeostasis; functions in docking and fusion of post-Golgi vesicles with plasma membrane; homolog of Sro7p and Drosophila lethal giant larvae tumor suppressor; interacts with SNARE protein Sec9p
YBL107C	YBL107C	S000000203	-1.79	2.659	1.16692	3	Putative protein of unknown function; green fluorescent protein (GFP)-fusion protein localizes to the cytoplasm; YBL107C is not an essential gene
YBL111C	YBL111C	S000002151	-0.1	1.523	0.356371	6	Helicase-like protein encoded within the telomeric Y' element
YBL113C	YBL113C	S000002153	0.36	2.82	0.656788	3	Helicase-like protein encoded within the telomeric Y' element
NTH2	YBR001C	S000000205	0.05	1.103	2.09798	9	Putative neutral trehalase, required for thermotolerance and may mediate resistance to other cellular stresses
RER2	YBR002C	S000000206	0.11	2.433	2.3561	5	Cis-prenyltransferase involved in dolichol synthesis; participates in endoplasmic reticulum (ER) protein sorting
COQ1	YBR003W	S000000207	0.59	2.341	1.67006	13	Hexaprenyl pyrophosphate synthetase, catalyzes the first step in ubiquinone (coenzyme Q) biosynthesis
RCR1	YBR005W	S000000209	-1.97	2.552	0.945189	2	Protein of the ER membrane involved in cell wall chitin deposition; may function in the endosomal-vacuolar trafficking pathway, helping determine whether plasma membrane proteins are degraded or routed to the plasma membrane
UGA2	YBR006W	S000000210	-0.2	3.191	1.76859	11	Succinate semialdehyde dehydrogenase involved in the utilization of gamma-aminobutyrate (GABA) as a nitrogen source; part of the 4-aminobutyrate and glutamate degradation pathways; localized to the cytoplasm
DSF2	YBR007C	S000000211	1.47	2.749	0.895925	4	Deletion suppressor of mpt5 mutation
HHF1	YBR009C	S000000213	1.48	2.943	0.738643	9	One of two identical histone H4 proteins (see also HHF2); core histone required for chromatin assembly and chromosome function; contributes to telomeric silencing; N-terminal domain involved in maintaining genomic integrity
HHT1	YBR010W	S000000214	-0.28	1.382	0.631476	7	One of two identical histone H3 proteins (see also HHT2); core histone required for chromatin assembly, involved in heterochromatin-mediated telomeric and HM silencing; regulated by acetylation, methylation, and mitotic phosphorylation
IPP1	YBR011C	S000000215	1.61	3.816	0.859071	23	Cytoplasmic inorganic pyrophosphatase (PPase), catalyzes the rapid exchange of oxygens from Pi with water, highly expressed and essential for viability, active-site residues show identity to those from E. coli PPase
YBR012W-B	YBR012W-B	S000002155	0.95	5.124	0.169911	1	Retrotransposon TYA Gag and TYB Pol genes; transcribed/translated as one unit; polyprotein is processed to make a nucleocapsid-like protein (Gag), reverse transcriptase (RT), protease (PR), and integrase (IN); similar to retroviral genes
GRX7	YBR014C	S000000218	0.22	2.412	1.58085	8	Cis-golgi localized monothiol glutaredoxin; more similar in activity to dithiol than other monothiol glutaredoxins; involved in the oxidative stress response; does not bind metal ions; functional overlap with GRX6
MNN2	YBR015C	S000000219	-0.61	1.724	0.740258	20	Alpha-1,2-mannosyltransferase, responsible for addition of the first alpha-1,2-linked mannose to form the branches on the mannan backbone of oligosaccharides, localizes to an early Golgi compartment
YBR016W	YBR016W	S000000220	-0.54	3.321	0.748098	1	Plasma membrane protein of unknown function; has similarity to hydrophilins, which are hydrophilic, glycine-rich proteins involved in the adaptive response to hyperosmotic conditions
KAP104	YBR017C	S000000221	-0.42	1.609	1.04572	21	Transportin, cytosolic karyopherin beta 2 involved in delivery of heterogeneous nuclear ribonucleoproteins to the nucleoplasm, binds rg-nuclear localization signals on Nab2p and Hrp1p, plays a role in cell-cycle progression
FUR4	YBR021W	S000000225	-0.61	1.854	0.236457	2	Uracil permease, localized to the plasma membrane; expression is tightly regulated by uracil levels and environmental cues
POA1	YBR022W	S000000226	0.77	3.586	1.35444	7	Phosphatase that is highly specific for ADP-ribose 1''-phosphate, a tRNA splicing metabolite; may have a role in regulation of tRNA splicing
CHS3	YBR023C	S000000227	-0.93	2.753	1.27806	28	Chitin synthase III, catalyzes the transfer of N-acetylglucosamine (GlcNAc) to chitin; required for synthesis of the majority of cell wall chitin, the chitin ring during bud emergence, and spore wall chitosan
SCO2	YBR024W	S000000228	-0.13	2.474	1.29963	7	Protein anchored to the mitochondrial inner membrane, similar to Sco1p and may have a redundant function with Sco1p in delivery of copper to cytochrome c oxidase; interacts with Cox2p
OLA1	YBR025C	S000000229	-0.12	1.013	0.915178	24	P-loop ATPase with similarity to human OLA1 and bacterial YchF; identified as specifically interacting with the proteasome; protein levels are induced by hydrogen peroxide
ETR1	YBR026C	S000000230	-0.37	2.026	1.25024	15	2-enoyl thioester reductase, member of the medium chain dehydrogenase/reductase family; localized to in mitochondria, where it has a probable role in fatty acid synthesis
YBR028C	YBR028C	S000000232	0.85	2.614	0.736267	6	Putative protein kinase, possible substrate of cAMP-dependent protein kinase (PKA)
CDS1	YBR029C	S000000233	-0.32	1.888	0.889767	5	Phosphatidate cytidylyltransferase (CDP-diglyceride synthetase); an enzyme that catalyzes that conversion of CTP + phosphate into diphosphate + CDP-diaclglyerol, a critical step in the synthesis of all major yeast phospholipids
YBR030W	YBR030W	S000000234	-0.55	3.047	0.989519	5	Putative protein of unknown function; predicted protein contains a SET domain (S-adenosyl-L-methionine-binding fold)
RPL4A	YBR031W	S000000235	0.42	1.841	0.631257	24	N-terminally acetylated protein component of the large (60S) ribosomal subunit, nearly identical to Rpl4Bp and has similarity to E. coli L4 and rat L4 ribosomal proteins
HMT1	YBR034C	S000000238	-0.07	5.216	0.68061	7	Nuclear SAM-dependent mono- and asymmetric arginine dimethylating methyltransferase that modifies hnRNPs, including Npl3p and Hrp1p, thus facilitating nuclear export of these proteins; required for viability of npl3 mutants
PDX3	YBR035C	S000000239	-2.72	1.979	1.05318	10	Pyridoxine (pyridoxamine) phosphate oxidase, has homologs in E. coli and Myxococcus xanthus; transcription is under the general control of nitrogen metabolism
CSG2	YBR036C	S000000240	1.93	2.137	2.70298	1	Endoplasmic reticulum membrane protein, required for mannosylation of inositolphosphorylceramide and for growth at high calcium concentrations
SCO1	YBR037C	S000000241	0.22	1.153	0.988012	7	Copper-binding protein of the mitochondrial inner membrane, required for cytochrome c oxidase activity and respiration; may function to deliver copper to cytochrome c oxidase; has similarity to thioredoxins
CHS2	YBR038W	S000000242	0.42	3.58	0.380983	5	Chitin synthase II, requires activation from zymogenic form in order to catalyze the transfer of N-acetylglucosamine (GlcNAc) to chitin; required for the synthesis of chitin in the primary septum during cytokinesis
ATP3	YBR039W	S000000243	-0.09	1.24	1.17936	15	Gamma subunit of the F1 sector of mitochondrial F1F0 ATP synthase, which is a large, evolutionarily conserved enzyme complex required for ATP synthesis
FAT1	YBR041W	S000000245	1.72	1.736	1.67906	16	Fatty acid transporter and very long-chain fatty acyl-CoA synthetase, may form a complex with Faa1p or Faa4p that imports and activates exogenous fatty acids
CST26	YBR042C	S000000246	-0.06	3.881	1.31727	6	Protein of unknown function, affects chromosome stability when overexpressed
TCM62	YBR044C	S000000248	0.44	1.734	1.39988	5	Protein involved in the assembly of the mitochondrial succinate dehydrogenase complex; putative chaperone
ZTA1	YBR046C	S000000250	-0.8	2.311	1.51792	10	Zeta-crystallin homolog, found in the cytoplasm and nucleus; has similarity to E. coli quinone oxidoreductase and to human zeta-crystallin, which has quinone oxidoreductase activity
RPS11B	YBR048W	S000000252	-0.59	2.559	0.592279	16	Protein component of the small (40S) ribosomal subunit; identical to Rps11Ap and has similarity to E. coli S17 and rat S11 ribosomal proteins
REB1	YBR049C	S000000253	0.49	2.753	0.674598	23	RNA polymerase I enhancer binding protein; DNA binding protein which binds to genes transcribed by both RNA polymerase I and RNA polymerase II; required for termination of RNA polymerase I transcription
RFS1	YBR052C	S000000256	2.32	4.585	1.15813	8	Protein of unknown function; member of a flavodoxin-like fold protein family that includes Pst2p and Ycp4p; green fluorescent protein (GFP)-fusion protein localizes to the cytoplasm in a punctate pattern
YBR053C	YBR053C	S000000257	-0.55	2.24	1.58436	13	Putative protein of unknown function; induced by cell wall perturbation
YRO2	YBR054W	S000000258	1.24	1.751	0.486749	4	Putative protein of unknown function; the authentic, non-tagged protein is detected in a phosphorylated state in highly purified mitochondria in high-throughput studies; transcriptionally regulated by Haa1p
PRP6	YBR055C	S000000259	0.51	3.394	1.30495	9	Splicing factor, component of the U4/U6-U5 snRNP complex
YBR056W	YBR056W	S000000260	0.51	2.329	2.22669	21	Putative cytoplasmic protein of unknown function
MUM2	YBR057C	S000000261	0.25	1.667	0.298282	4	Cytoplasmic protein essential for meiotic DNA replication and sporulation; interacts with Orc2p, which is a component of the origin recognition complex
UBP14	YBR058C	S000000262	0.61	4.792	0.876302	12	Ubiquitin-specific protease that specifically disassembles unanchored ubiquitin chains; involved in fructose-1,6-bisphosphatase (Fbp1p) degradation; similar to human isopeptidase T
AKL1	YBR059C	S000000263	1.5	3.808	1.28583	21	Ser-Thr protein kinase, member (with Ark1p and Prk1p) of the Ark kinase family; involved in endocytosis and actin cytoskeleton organization
TRM7	YBR061C	S000000265	-0.66	3.114	0.662756	7	2'-O-ribose methyltransferase, methylates the 2'-O-ribose of nucleotides at positions 32 and 34 of the tRNA anticodon loop
YBR062C	YBR062C	S000000266	1.81	1.386	0.948619	4	Hypothetical protein
NRG2	YBR066C	S000000270	0.02	2.037	1.29244	1	Transcriptional repressor that mediates glucose repression and negatively regulates filamentous growth; has similarity to Nrg1p
BAP2	YBR068C	S000000272	-1.3	4.357	1.18624	6	High-affinity leucine permease, functions as a branched-chain amino acid permease involved in the uptake of leucine, isoleucine and valine; contains 12 predicted transmembrane domains
TAT1	YBR069C	S000000273	-1.6	2.16	0.386302	8	Amino acid transport protein for valine, leucine, isoleucine, and tyrosine, low-affinity tryptophan and histidine transporter; overexpression confers FK506 and FTY720 resistance
ALG14	YBR070C	S000000274	0.24	2.321	1.33997	3	Component of UDP-GlcNAc transferase required for the second step of dolichyl-linked oligosaccharide synthesis; anchors the catalytic subunit Alg13p to the ER membrane; similar to bacterial and human glycosyltransferases
YBR071W	YBR071W	S000000275	0.3	1.895	2.19033	2	Putative protein of unknown function; (GFP)-fusion and epitope-tagged proteins localize to the cytoplasm; mRNA expression may be regulated by the cell cycle and/or cell wall stress
HSP26	YBR072W	S000000276	0.45	3.416	43.7777	12	Small heat shock protein (sHSP) with chaperone activity; forms hollow, sphere-shaped oligomers that suppress unfolded proteins aggregation; oligomer activation requires a heat-induced conformational change; not expressed in unstressed cells
RDH54	YBR073W	S000000277	0.79	1.899	0.826594	18	DNA-dependent ATPase, stimulates strand exchange by modifying the topology of double-stranded DNA; involved in recombinational repair of DNA double-strand breaks during mitosis and meiosis; proposed to be involved in crossover interference
YBR074W	YBR074W	S000000278	1.03	2.737	0.501771	16	Putative metalloprotease
SLM4	YBR077C	S000000281	-1.18	1.753	0.995125	4	Component of the EGO complex, which is involved in the regulation of microautophagy, and of the GSE complex, which is required for proper sorting of amino acid permease Gap1p; gene exhibits synthetic genetic interaction with MSS4
ECM33	YBR078W	S000000282	-0.46	3.999	0.677621	10	GPI-anchored protein of unknown function, has a possible role in apical bud growth; GPI-anchoring on the plasma membrane crucial to function; phosphorylated in mitochondria; similar to Sps2p and Pst1p
RPG1	YBR079C	S000000283	0.77	2.308	1.03433	65	Subunit of the core complex of translation initiation factor 3(eIF3), essential for translation; part of a subcomplex (Prt1p-Rpg1p-Nip1p) that stimulates binding of mRNA and tRNA(i)Met to ribosomes
SEC18	YBR080C	S000000284	-0.27	1.606	1.78003	37	ATPase required for the release of Sec17p during the 'priming' step in homotypic vacuole fusion and for ER to Golgi transport; homolog of the mammalian NSF
SPT7	YBR081C	S000000285	0.54	4.206	0.912819	29	Subunit of the SAGA transcriptional regulatory complex, involved in proper assembly of the complex; also present as a C-terminally truncated form in the SLIK/SALSA transcriptional regulatory complex
UBC4	YBR082C	S000000286	-0.83	2.623	1.32354	4	Ubiquitin-conjugating enzyme (E2), mediates degradation of short-lived and abnormal proteins; interacts with E3-CaM in ubiquitinating calmodulin; interacts with many SCF ubiquitin protein ligases; component of the cellular stress response
TEC1	YBR083W	S000000287	-1.27	1.838	0.982616	3	Transcription factor required for full Ty1 epxression, Ty1-mediated gene activation, and haploid invasive and diploid pseudohyphal growth; TEA/ATTS DNA-binding domain family member
MIS1	YBR084W	S000000288	-0.33	2.179	0.698484	40	Mitochondrial C1-tetrahydrofolate synthase, involved in interconversion between different oxidation states of tetrahydrofolate (THF); provides activities of formyl-THF synthetase, methenyl-THF cyclohydrolase, and methylene-THF dehydrogenase
YBR085C-A	YBR085C-A	S000007522	-0.66	1.77	1.91318	4	Putative protein of unknown function; green fluorescent protein (GFP)-fusion protein localizes to the cytoplasm and to the nucleus
IST2	YBR086C	S000000290	-0.08	2.565	1.25675	20	Plasma membrane protein that may be involved in osmotolerance, localizes to the mother cell in small-budded cells and to the bud in medium- and large-budded cells; mRNA is transported to the bud tip by an actomyosin-driven process
RFC5	YBR087W	S000000291	-1.44	3.16	1.63342	13	Subunit of heteropentameric Replication factor C (RF-C), which is a DNA binding protein and ATPase that acts as a clamp loader of the proliferating cell nuclear antigen (PCNA) processivity factor for DNA polymerases delta and epsilon
POL30	YBR088C	S000000292	-1.02	1.959	0.738362	15	Proliferating cell nuclear antigen (PCNA), functions as the sliding clamp for DNA polymerase delta; may function as a docking site for other proteins required for mitotic and meiotic chromosomal DNA replication and for DNA repair
NHP6B	YBR089C-A	S000002157	-1.06	3.072	0.946845	3	High-mobility group non-histone chromatin protein, functionally redundant with Nhp6Ap; homologous to mammalian high mobility group proteins 1 and 2; acts to recruit transcription factor Rcs1p to certain promoters
MRS5	YBR091C	S000000295	0.05	1.753	1.57658	2	Essential protein of the inner mitochondrial membrane, peripherally localized; component of the TIM22 complex, which is a twin-pore translocase that mediates insertion of numerous multispanning inner membrane proteins
PHO3	YBR092C	S000000296	-4.3	4.534	0.266046	6	Constitutively expressed acid phosphatase similar to Pho5p; brought to the cell surface by transport vesicles; hydrolyzes thiamin phosphates in the periplasmic space, increasing cellular thiamin uptake; expression is repressed by thiamin
PBY1	YBR094W	S000000298	0.71	1.312	1.22442	17	Putative tubulin tyrosine ligase associated with P-bodies
RXT2	YBR095C	S000000299	-1.92	2.136	0.985891	7	Subunit of the histone deacetylase Rpd3L complex; possibly involved in cell fusion and invasive growth
YBR096W	YBR096W	S000000300	0.64	2.049	1.41848	8	Putative protein of unknown function; green fluorescent protein (GFP)-fusion protein localizes to the ER
VPS15	YBR097W	S000000301	0.96	1.689	1.97863	15	Myristoylated serine/threonine protein kinase involved in vacuolar protein sorting; functions as a membrane-associated complex with Vps34p; active form recruits Vps34p to the Golgi membrane; interacts with the GDP-bound form of Gpa1p
FES1	YBR101C	S000000305	0.16	2.548	1.13623	14	Hsp70 (Ssa1p) nucleotide exchange factor, cytosolic homolog of Sil1p, which is the nucleotide exchange factor for BiP (Kar2p) in the endoplasmic reticulum
EXO84	YBR102C	S000000306	0.3	1.904	1.5205	12	Essential protein with dual roles in spliceosome assembly and exocytosis; the exocyst complex (Sec3p, Sec5p, Sec6p, Sec8p, Sec10p, Sec15p, Exo70p, and Exo84p) mediates polarized targeting of secretory vesicles to active sites of exocytosis
SIF2	YBR103W	S000000307	0.25	3.122	0.858104	10	WD40 repeat-containing subunit of the Set3C histone deacetylase complex, which represses early/middle sporulation genes; antagonizes telomeric silencing; binds specifically to the Sir4p N-terminus
YMC2	YBR104W	S000000308	1	1.609	0.937831	3	Mitochondrial protein, putative inner membrane transporter with a role in oleate metabolism and glutamate biosynthesis; member of the mitochondrial carrier (MCF) family; has similarity with Ymc1p
PHO88	YBR106W	S000000310	-0.87	3.222	0.968601	10	Probable membrane protein, involved in phosphate transport; pho88 pho86 double null mutant exhibits enhanced synthesis of repressible acid phosphatase at high inorganic phosphate concentrations
YBR108W	YBR108W	S000000312	-0.17	1.935	1.15085	8	Protein interacting with Rsv167p; null mutant displays decreased frequency of mitochondrial genome loss (petite formation) and severe growth defect in minimal glycerol media
CMD1	YBR109C	S000000313	0.31	4.072	0.882642	5	Calmodulin; Ca++ binding protein that regulates Ca++ independent processes (mitosis, bud growth, actin organization, endocytosis, etc.) and Ca++ dependent processes (stress-activated pathways), targets include Nuf1p, Myo2p and calcineurin
ALG1	YBR110W	S000000314	0	2.277	1.61631	13	Mannosyltransferase, involved in asparagine-linked glycosylation in the endoplasmic reticulum (ER); essential for viability, mutation is functionally complemented by human ortholog
YSA1	YBR111C	S000000315	-0.62	3.291	1.28085	7	Nudix hydrolase family member with ADP-ribose pyrophosphatase activity
CYC8	YBR112C	S000000316	-0.7	3.6	0.823734	26	General transcriptional co-repressor, acts together with Tup1p; also acts as part of a transcriptional co-activator complex that recruits the SWI/SNF and SAGA complexes to promoters
RAD16	YBR114W	S000000318	0.39	1.734	1.44779	8	Protein that recognizes and binds damaged DNA in an ATP-dependent manner (with Rad7p) during nucleotide excision repair; subunit of Nucleotide Excision Repair Factor 4 (NEF4) and the Elongin-Cullin-Socs (ECS) ligase complex
LYS2	YBR115C	S000000319	-0.27	2.098	0.994539	58	Alpha aminoadipate reductase, catalyzes the reduction of alpha-aminoadipate to alpha-aminoadipate 6-semialdehyde, which is the fifth step in biosynthesis of lysine; activation requires posttranslational phosphopantetheinylation by Lys5p
TKL2	YBR117C	S000000321	-0.11	2.057	5.97774	17	Transketolase, similar to Tkl1p; catalyzes conversion of xylulose-5-phosphate and ribose-5-phosphate to sedoheptulose-7-phosphate and glyceraldehyde-3-phosphate in the pentose phosphate pathway; needed for synthesis of aromatic amino acids
TEF2	YBR118W	S000000322	1.32	3.31	0.828314	42	Translational elongation factor EF-1 alpha; also encoded by TEF1; functions in the binding reaction of aminoacyl-tRNA (AA-tRNA) to ribosomes
MUD1	YBR119W	S000000323	-1.26	2.919	0.998148	4	U1 snRNP A protein, homolog of human U1-A; involved in nuclear mRNA splicing
CBP6	YBR120C	S000000324	0.75	1.748	1.06599	7	Mitochondrial translational activator of the COB mRNA; phosphorylated
GRS1	YBR121C	S000000325	-0.24	2.484	0.77903	43	Cytoplasmic and mitochondrial glycyl-tRNA synthase that ligates glycine to the cognate anticodon bearing tRNA; transcription termination factor that may interact with the 3'-end of pre-mRNA to promote 3'-end formation
TFC1	YBR123C	S000000327	-0.2	2.927	1.09908	10	One of six subunits of the RNA polymerase III transcription initiation factor complex (TFIIIC); part of the TauA globular domain of TFIIIC that binds DNA at the BoxA promoter sites of tRNA and similar genes; human homolog is TFIIIC-63
PTC4	YBR125C	S000000329	0.14	2.792	0.83729	11	Cytoplasmic type 2C protein phosphatase; identified as a high-copy number suppressor of the synthetic lethality of a cnb1 mpk1 double deletion; overexpression decreases high-osmolarity induced Hog1p phosphorylation and kinase activity
TPS1	YBR126C	S000000330	0.04	4.051	2.34543	26	Synthase subunit of trehalose-6-phosphate synthase/phosphatase complex, which synthesizes the storage carbohydrate trehalose; also found in a monomeric form; expression is induced by the stress response and repressed by the Ras-cAMP pathway
YBR126W-A	YBR126W-A	S000028600	-0.74	3.303	0.683897	2	Dubious ORF unlikely to encode a protein, based on available experimental and comparative sequence data; partially overlaps the dubious ORF YBR126W-B; identified by gene-trapping, microarray analysis, and genome-wide homology searches
VMA2	YBR127C	S000000331	1.15	4.528	0.827138	40	Subunit B of the eight-subunit V1 peripheral membrane domain of the vacuolar H+-ATPase (V-ATPase), an electrogenic proton pump found throughout the endomembrane system; contains nucleotide binding sites; also detected in the cytoplasm
ATG14	YBR128C	S000000332	0.61	4.242	1.75151	1	Autophagy-specific subunit of phosphatidylinositol 3-kinase complex I (with Vps34p, Vps15p, and Vps30p); Atg14p targets complex I to the pre-autophagosomal structure (PAS); required for localizing additional ATG proteins to the PAS
OPY1	YBR129C	S000000333	-0.59	3.703	1.32731	5	Protein of unknown function, overproduction blocks cell cycle arrest in the presence of mating pheromone; the authentic, non-tagged protein is detected in highly purified mitochondria in high-throughput studies
SHE3	YBR130C	S000000334	0.09	4.054	0.709168	11	Protein that acts as an adaptor between Myo4p and the She2p-mRNA complex; part of the mRNA localization machinery that restricts accumulation of certain proteins to the bud; also required for cortical ER inheritance
CCZ1	YBR131W	S000000335	0.38	2.845	1.10451	6	Protein involved in vacuolar assembly, essential for autophagy and the cytoplasm-to-vacuole pathway
HSL7	YBR133C	S000000337	1.09	1.709	0.673477	9	Protein arginine N-methyltransferase that exhibits septin and Hsl1p-dependent bud neck localization and periodic Hsl1p-dependent phosphorylation; required along with Hsl1p for bud neck recruitment, phosphorylation, and degradation of Swe1p
CKS1	YBR135W	S000000339	-0.15	2.529	1.00445	6	Cyclin-dependent protein kinase regulatory subunit and adaptor; modulates proteolysis of M-phase targets through interactions with the proteasome; role in transcriptional regulation, recruiting proteasomal subunits to target gene promoters
MEC1	YBR136W	S000000340	1.05	1.834	1.2139	8	Genome integrity checkpoint protein and PI kinase superfamily member; signal transducer required for cell cycle arrest and transcriptional responses prompted by damaged or unreplicated DNA; monitors and participates in meiotic recombination
YBR137W	YBR137W	S000000341	-0.39	4.806	1.73887	6	Protein of unknown function; localized to the cytoplasm; binds to Replication Protein A (RPA); YBR137W is not an essential gene
YBR139W	YBR139W	S000000343	-0.62	4.091	1.20347	12	Putative serine type carboxypeptidase with a role in phytochelatin synthesis; green fluorescent protein (GFP)-fusion protein localizes to the vacuole; expression induced by nitrogen limitation in a GLN3, GAT1-independent manner
IRA1	YBR140C	S000000344	0.19	2.321	1.65542	31	GTPase-activating protein that negatively regulates RAS by converting it from the GTP- to the GDP-bound inactive form, required for reducing cAMP levels under nutrient limiting conditions, mediates membrane association of adenylate cyclase
YBR141C	YBR141C	S000000345	-0.03	1.734	1.26271	2	Putative protein of unknown function; green fluorescent protein (GFP)-fusion protein localizes to the nucleolus; YBR141C is not an essential gene
MAK5	YBR142W	S000000346	0.59	2.45	0.842822	15	Essential nucleolar protein, putative DEAD-box RNA helicase required for maintenance of M1 dsRNA virus; involved in biogenesis of large (60S) ribosomal subunits
SUP45	YBR143C	S000000347	1.07	2.78	1.04943	27	Polypeptide release factor involved in translation termination; mutant form acts as a recessive omnipotent suppressor
ADH5	YBR145W	S000000349	-0.15	1.688	0.78149	4	Alcohol dehydrogenase isoenzyme V; involved in ethanol production
MRPS9	YBR146W	S000000350	-1.72	2.064	1.27597	9	Mitochondrial ribosomal protein of the small subunit
ARA1	YBR149W	S000000353	0.1	1.878	1.59516	16	NADP+ dependent arabinose dehydrogenase, involved in carbohydrate metabolism; purified as homodimer; naturally occurs with a N-terminus degradation product
TBS1	YBR150C	S000000354	1.53	3.284	2.11462	3	Putative protein of unknown function; the authentic, non-tagged protein is detected in highly purified mitochondria in high-throughput studies
APD1	YBR151W	S000000355	0.09	3.565	1.01255	19	Protein of unknown function, required for normal localization of actin patches and for normal tolerance of sodium ions and hydrogen peroxide; localizes to both cytoplasm and nucleus
SPP381	YBR152W	S000000356	-0.26	3.193	0.849744	3	mRNA splicing factor, component of U4/U6.U5 tri-snRNP; interacts genetically and physically with Prp38p
RPB5	YBR154C	S000000358	0.51	1.43	0.678302	7	RNA polymerase subunit ABC27, common to RNA polymerases I, II, and III; contacts DNA and affects transactivation
CNS1	YBR155W	S000000359	-0.25	1.65	0.702174	15	TPR-containing co-chaperone; binds both Hsp82p (Hsp90) and Ssa1p (Hsp70) and stimulates the ATPase activity of SSA1, ts mutants reduce Hsp82p function while over expression suppresses the phenotypes of an HSP82 ts allele and a cpr7 deletion
SLI15	YBR156C	S000000360	0.24	1.142	0.680044	3	Subunit of the Ipl1p-Sli15p-Bir1p complex that regulates kinetochore-microtubule attachments, activation of the spindle tension checkpoint, and mitotic spindle disassembly; regulates the activity and localization of the Ipl1p aurora kinase
YBR159W	YBR159W	S000000363	-0.62	2.222	1.4026	11	Microsomal beta-keto-reductase; contains oleate response element (ORE) sequence in the promoter region; mutants exhibit reduced VLCFA synthesis, accumulate high levels of dihydrosphingosine, phytosphingosine and medium-chain ceramides
CDC28	YBR160W	S000000364	0.16	3.359	1.59884	14	Catalytic subunit of the main cell cycle cyclin-dependent kinase (CDK); alternately associates with G1 cyclins (CLNs) and G2/M cyclins (CLBs) which direct the CDK to specific substrates
CSH1	YBR161W	S000000365	0.79	3.037	3.65685	7	Probable catalytic subunit of a mannosylinositol phosphorylceramide (MIPC) synthase, forms a complex with probable regulatory subunit Csg2p; function in sphingolipid biosynthesis is overlapping with that of Sur1p
TOS1	YBR162C	S000000366	-0.67	2.792	2.40152	10	Covalently-bound cell wall protein of unknown function; identified as a cell cycle regulated SBF target gene; deletion mutants are highly resistant to treatment with beta-1,3-glucanase; has sequence similarity to YJL171C
DEM1	YBR163W	S000000367	-0.08	1.121	2.09231	3	Mitochondrial protein of unknown function; null mutant has defects in cell morphology and in response to air drying; may be regulated by the transcription factor Ace2
ARL1	YBR164C	S000000368	0.28	1.843	1.04632	8	Soluble GTPase with a role in regulation of membrane traffic; regulates potassium influx; G protein of the Ras superfamily, similar to ADP-ribosylation factor
TYR1	YBR166C	S000000370	4.28	3.72	1.63026	9	Prephenate dehydrogenase involved in tyrosine biosynthesis, expression is dependent on phenylalanine levels
POP7	YBR167C	S000000371	-0.93	2.994	0.692363	5	Subunit of both RNase MRP, which cleaves pre-rRNA, and nuclear RNase P, which cleaves tRNA precursors to generate mature 5' ends
SSE2	YBR169C	S000000373	-0.91	2.046	3.71407	33	Member of the heat shock protein 70 (HSP70) family; may be involved in protein folding; localized to the cytoplasm; highly homologous to the heat shock protein Sse1p
NPL4	YBR170C	S000000374	-0.22	1.832	1.18888	18	Endoplasmic reticulum and nuclear membrane protein, forms a complex with Cdc48p and Ufd1p that recognizes ubiquitinated proteins in the endoplasmic reticulum and delivers them to the proteasome for degradation
SEC66	YBR171W	S000000375	0.24	1.944	1.35397	10	Non-essential subunit of Sec63 complex (Sec63p, Sec62p, Sec66p and Sec72p); with Sec61 complex, Kar2p/BiP and Lhs1p forms a channel competent for SRP-dependent and post-translational SRP-independent protein targeting and import into the ER
SMY2	YBR172C	S000000376	-0.62	2.962	0.726407	12	Protein of unknown function involved in COPII vesicle formation; interacts with the Sec23p/Sec24p subcomplex; overexpression suppresses the temperature sensitivity of a myo2 mutant; has similarity to S. pombe Mpd2
SWD3	YBR175W	S000000379	-0.53	3.245	0.974173	3	Essential subunit of the COMPASS (Set1C) complex, which methylates histone H3 on lysine 4 and is required in transcriptional silencing near telomeres; WD40 beta propeller superfamily member and ortholog of mammalian WDR5
ECM31	YBR176W	S000000380	-0.96	3.685	1.20089	11	Ketopantoate hydroxymethyltransferase, required for pantothenic acid biosynthesis, converts 2-oxoisovalerate into 2-dehydropantoate
EHT1	YBR177C	S000000381	-0.06	6.494	0.772175	17	Acyl-coenzymeA:ethanol O-acyltransferase that plays a minor role in medium-chain fatty acid ethyl ester biosynthesis; possesses short-chain esterase activity; localizes to lipid particles and the mitochondrial outer membrane
FZO1	YBR179C	S000000383	1.8	3.103	1.15037	11	Mitochondrial integral membrane protein involved in mitochondrial fusion and maintenance of the mitochondrial genome; contains N-terminal GTPase domain
RPS6B	YBR181C	S000000385	1.38	1.556	0.589597	23	Protein component of the small (40S) ribosomal subunit; identical to Rps6Ap and has similarity to rat S6 ribosomal protein
MBA1	YBR185C	S000000389	0.12	3.879	1.78571	4	Protein involved in assembly of mitochondrial respiratory complexes; may act as a receptor for proteins destined for export from the mitochondrial matrix to the inner membrane
GDT1	YBR187W	S000000391	-3.27	1.946	0.902501	1	Putative protein of unknown function; expression is reduced in a gcr1 null mutant; GFP-fusion protein localizes to the vacuole; expression pattern and physical interactions suggest a possible role in ribosome biogenesis
NTC20	YBR188C	S000000392	0.15	1.319	0.642915	3	Member of a complex, including Prp19p, that binds to the spliceosome; required for pre-mRNA splicing
RPS9B	YBR189W	S000000393	-0.24	1.514	0.587211	24	Protein component of the small (40S) ribosomal subunit; nearly identical to Rps9Ap and has similarity to E. coli S4 and rat S9 ribosomal proteins
RPL21A	YBR191W	S000000395	-0.96	2.742	0.62109	14	Protein component of the large (60S) ribosomal subunit, nearly identical to Rpl21Bp and has similarity to rat L21 ribosomal protein
RIM2	YBR192W	S000000396	0.1	1.078	1.33182	5	Mitochondrial pyrimidine nucleotide transporter; imports pyrimidine nucleoside triphosphates and exports pyrimidine nucleoside monophosphates; member of the mitochondrial carrier family
MED8	YBR193C	S000000397	-1.6	2.154	0.803572	6	Subunit of the RNA polymerase II mediator complex; associates with core polymerase subunits to form the RNA polymerase II holoenzyme; essential for transcriptional regulation
MSI1	YBR195C	S000000399	0.77	2.168	0.757963	6	Subunit of chromatin assembly factor I (CAF-1), negative regulator of the RAS/cAMP pathway via sequestration of Npr1p kinase; localizes to the nucleus and cytoplasm; homologous to human retinoblastoma binding proteins RbAp48 and RbAp46
PGI1	YBR196C	S000000400	0.51	2.501	1.01255	31	Glycolytic enzyme phosphoglucose isomerase, catalyzes the interconversion of glucose-6-phosphate and fructose-6-phosphate; required for cell cycle progression and completion of the gluconeogenic events of sporulation
YBR197C	YBR197C	S000000401	0.32	2.204	0.527338	3	Putative protein of unknown function; green fluorescent protein (GFP)-fusion protein localizes to the cytoplasm and nucleus; YBR197C is not an essential gene
TAF5	YBR198C	S000000402	-0.79	4.888	1.06164	33	Subunit (90 kDa) of TFIID and SAGA complexes, involved in RNA polymerase II transcription initiation and in chromatin modification
KTR4	YBR199W	S000000403	0.15	1.282	1.45297	16	Putative mannosyltransferase involved in protein glycosylation; member of the KRE2/MNT1 mannosyltransferase family
BEM1	YBR200W	S000000404	0.35	1.708	1.26435	10	Protein containing SH3-domains, involved in establishing cell polarity and morphogenesis; functions as a scaffold protein for complexes that include Cdc24p, Ste5p, Ste20p, and Rsr1p
MCM7	YBR202W	S000000406	-1.59	1.907	0.525441	9	Component of the hexameric MCM complex, which is important for priming origins of DNA replication in G1 and becomes an active ATP-dependent helicase that promotes DNA melting and elongation when activated by Cdc7p-Dbf4p in S-phase
YBR204C	YBR204C	S000000408	-0.76	2.157	1.11798	10	Serine hydrolase; YBR204C is not an essential gene
KTR3	YBR205W	S000000409	-3.02	3.628	0.895646	16	Putative alpha-1,2-mannosyltransferase involved in O- and N-linked protein glycosylation; member of the KRE2/MNT1 mannosyltransferase family
FTH1	YBR207W	S000000411	0.01	2.967	1.05136	4	Putative high affinity iron transporter involved in transport of intravacuolar stores of iron; forms complex with Fet5p; expression is regulated by iron; proposed to play indirect role in endocytosis
DUR1	YBR208C	S000000412	0.32	1.178	4.06639	38	Urea amidolyase, contains both urea carboxylase and allophanate hydrolase activities, degrades urea to CO2 and NH3; expression sensitive to nitrogen catabolite repression and induced by allophanate, an intermediate in allantoin degradation
AME1	YBR211C	S000000415	1.06	1.941	0.801417	4	Essential kinetochore protein associated with microtubules and spindle pole bodies; component of the kinetochore sub-complex COMA (Ctf19p, Okp1p, Mcm21p, Ame1p); involved in spindle checkpoint maintenance
NGR1	YBR212W	S000000416	-0.9	2.83	1.58568	15	RNA binding protein that negatively regulates growth rate; interacts with the 3' UTR of the mitochondrial porin (POR1) mRNA and enhances its degradation; overexpression impairs mitochondrial function; expressed in stationary phase
MET8	YBR213W	S000000417	0.58	1.666	0.692171	5	Bifunctional dehydrogenase and ferrochelatase, involved in the biosynthesis of siroheme, a prosthetic group used by sulfite reductase; required for sulfate assimilation and methionine biosynthesis
SDS24	YBR214W	S000000418	2.01	4.124	3.14073	18	One of two S. cerevisiae homologs (Sds23p and Sds24p) of the Schizosaccharomyces pombe Sds23 protein, which genetic studies have implicated in APC/cyclosome regulation; may play an indirect role in fluid-phase endocytosis
HPC2	YBR215W	S000000419	0.01	3.848	0.887611	9	Subunit of the HIR complex, a nucleosome assembly complex involved in regulation of histone gene transcription; mutants display synthetic defects with subunits of FACT, a complex that allows passage of RNA Pol II through nucleosomes
YBP1	YBR216C	S000000420	-0.23	3.045	1.12171	15	Protein required for oxidation of specific cysteine residues of the transcription factor Yap1p, resulting in the nuclear localization of Yap1p in response to stress
PYC2	YBR218C	S000000422	0.35	1.732	1.16748	51	Pyruvate carboxylase isoform, cytoplasmic enzyme that converts pyruvate to oxaloacetate; highly similar to isoform Pyc1p but differentially regulated; mutations in the human homolog are associated with lactic acidosis
YBR220C	YBR220C	S000000424	1.56	2.797	1.52256	5	Putative protein of unknown function; YBR220C is not an essential gene
PDB1	YBR221C	S000000425	0.61	3.98	0.834856	11	E1 beta subunit of the pyruvate dehydrogenase (PDH) complex, which is an evolutionarily-conserved multi-protein complex found in mitochondria
PCS60	YBR222C	S000000426	0.67	3.48	1.74957	25	Peroxisomal AMP-binding protein, localizes to both the peroxisomal peripheral membrane and matrix, expression is highly inducible by oleic acid, similar to E. coli long chain acyl-CoA synthetase
TDP1	YBR223C	S000000427	0.95	2.512	1.28334	2	Tyrosyl-DNA Phosphodiesterase I, hydrolyzes 3'-phosphotyrosyl bonds to generate 3'-phosphate DNA and tyrosine, involved in the repair of DNA lesions created by topoisomerase I
YBR225W	YBR225W	S000000429	-0.12	2.027	1.97966	14	Putative protein of unknown function; non-essential gene identified in a screen for mutants affected in mannosylphophorylation of cell wall components
MCX1	YBR227C	S000000431	1.06	1.989	1.41539	9	Mitochondrial ATP-binding protein, possibly a mitochondrial chaperone with non-proteolytic function; similar to bacterial ClpX proteins
ROT2	YBR229C	S000000433	-1.04	1.577	0.934198	22	Glucosidase II catalytic subunit required for normal cell wall synthesis; mutations in rot2 suppress tor2 mutations, and are synthetically lethal with rot1 mutations
OM14	YBR230C	S000000434	0.18	1.329	2.2885	3	Integral mitochondrial outer membrane protein; abundance is decreased in cells grown in glucose relative to other carbon sources; appears to contain 3 alpha-helical transmembrane segments; ORF encodes a 97-basepair intron
SWC5	YBR231C	S000000435	-0.28	2.961	0.648757	2	Protein of unknown function, component of the SWR1 complex, which exchanges histone variant H2AZ (Htz1p) for chromatin-bound histone H2A
PBP2	YBR233W	S000000437	-0.54	4.05	2.4369	8	RNA binding protein with similarity to mammalian heterogeneous nuclear RNP K protein, involved in the regulation of telomere position effect and telomere length
DAD3	YBR233W-A	S000007595	-0.01	1.989	0.595759	5	Essential subunit of the Dam1 complex (aka DASH complex), couples kinetochores to the force produced by MT depolymerization thereby aiding in chromosome segregation; is transferred to the kinetochore prior to mitosis
ARC40	YBR234C	S000000438	-0.59	1.412	1.05249	15	Subunit of the ARP2/3 complex, which is required for the motility and integrity of cortical actin patches
YBR235W	YBR235W	S000000439	-1.2	3.167	1.49988	3	Putative ion transporter, similar to mammalian electroneutral Na(+)-(K+)-C1- cotransporter family; YBR235W is not an essential gene
ABD1	YBR236C	S000000440	-0.03	2.239	1.17646	8	Methyltransferase, catalyzes the transfer of a methyl group from S-adenosylmethionine to the GpppN terminus of capped mRNA
PRP5	YBR237W	S000000441	-0.49	1.755	1.41152	3	RNA helicase in the DEAD-box family, necessary for prespliceosome formation, bridges U1 and U2 snRNPs and enables stable U2 snRNP association with intron RNA
YBR238C	YBR238C	S000000442	0.38	1.301	0.243029	3	Mitochondrial membrane protein with similarity to Rmd9p; not required for respiratory growth but causes a synthetic respiratory defect in combination with rmd9 mutations; transcriptionally up-regulated by TOR; deletion increases life span
YBR239C	YBR239C	S000000443	1.11	1.553	0.652975	5	Putative protein of unknown function; green fluorescent protein (GFP)-fusion protein localizes to the cytoplasm and nucleus; plays a role in restricting Ty1 transposition
YBR241C	YBR241C	S000000445	2.84	4.071	1.59052	3	Putative transporter, member of the sugar porter family; green fluorescent protein (GFP)-fusion protein localizes to the vacuolar membrane; YBR241C is not an essential gene
YBR242W	YBR242W	S000000446	0.46	2.228	0.337989	8	Putative protein of unknown function; green fluorescent protein (GFP)-fusion protein localizes to the cytoplasm and nucleus; YBR242W is not an essential gene
ALG7	YBR243C	S000000447	-1.15	1.346	1.36974	3	UDP-N-acetyl-glucosamine-1-P transferase, transfers Glc-Nac-P from UDP-GlcNac to Dol-P in the ER in the first step of the dolichol pathway of protein asparagine-linked glycosylation; inhibited by tunicamycin
GPX2	YBR244W	S000000448	0.26	3.188	1.03821	9	Phospholipid hydroperoxide glutathione peroxidase induced by glucose starvation that protects cells from phospholipid hydroperoxides and nonphospholipid peroxides during oxidative stress
ISW1	YBR245C	S000000449	-0.02	1.931	1.31144	36	Member of the imitation-switch (ISWI) class of ATP-dependent chromatin remodeling complexes; ATPase that forms a complex with Ioc2p and Ioc4p to regulate transcription elongation, and a complex with Ioc3p to repress transcription initiation
YBR246W	YBR246W	S000000450	1.62	3.285	0.839353	6	Putative protein of unknown function; deletion results in a weak carboxypeptidase Y missorting/secretion phenotype; YBR246W is not an essential gene
ENP1	YBR247C	S000000451	1.28	2.044	0.741516	16	Protein associated with U3 and U14 snoRNAs, required for pre-rRNA processing and 40S ribosomal subunit synthesis; localized in the nucleus and concentrated in the nucleolus
HIS7	YBR248C	S000000452	0.05	3.355	0.707107	30	Imidazole glycerol phosphate synthase (glutamine amidotransferase:cyclase), catalyzes the fifth and sixth steps of histidine biosynthesis and also produces 5-aminoimidazole-4-carboxamide ribotide (AICAR), a purine precursor
ARO4	YBR249C	S000000453	1.21	5.932	0.640213	18	3-deoxy-D-arabino-heptulosonate-7-phosphate (DAHP) synthase, catalyzes the first step in aromatic amino acid biosynthesis and is feedback-inhibited by tyrosine or high concentrations of phenylalanine or tryptophan
MRPS5	YBR251W	S000000455	-0.37	4.393	0.946582	4	Mitochondrial ribosomal protein of the small subunit
DUT1	YBR252W	S000000456	-0.31	2.618	0.676893	4	dUTPase, catalyzes hydrolysis of dUTP to dUMP and PPi, thereby preventing incorporation of uracil into DNA during replication; critical for the maintenance of genetic stability
SRB6	YBR253W	S000000457	-0.48	2.151	0.87321	2	Subunit of the RNA polymerase II mediator complex; associates with core polymerase subunits to form the RNA polymerase II holoenzyme; essential for transcriptional regulation
TRS20	YBR254C	S000000458	0.7	3.482	0.860561	4	One of 10 subunits of the transport protein particle (TRAPP) complex of the cis-Golgi which mediates vesicle docking and fusion; mutations in the human homolog cause the spondyloepiphyseal dysplasia tarda (SEDL) disorder
YBR255W	YBR255W	S000000459	2.47	3.018	1.42415	3	Protein of unknown function, required for normal growth rate at 15 degrees C; green fluorescent protein (GFP)-fusion protein localizes to the cytoplasm in a punctate pattern; YBR255W is synthetically sick with cdc13-1
RIB5	YBR256C	S000000460	2.26	5.096	1.10746	8	Riboflavin synthase; catalyzes the last step of the riboflavin biosynthesis pathway
POP4	YBR257W	S000000461	0.15	3.296	0.717226	3	Subunit of both RNase MRP, which cleaves pre-rRNA, and nuclear RNase P, which cleaves tRNA precursors to generate mature 5' ends; binds to the RPR1 RNA subunit in Rnase P
RGD1	YBR260C	S000000464	0.87	1.836	1.27783	15	GTPase-activating protein (RhoGAP) for Rho3p and Rho4p, possibly involved in control of actin cytoskeleton organization
YBR261C	YBR261C	S000000465	-1	2.106	0.960129	7	Putative S-adenosylmethionine-dependent methyltransferase of the seven beta-strand family; green fluorescent protein (GFP)-fusion protein localizes to the cytoplasm; YBR261C is not an essential gene
YBR262C	YBR262C	S000000466	1.03	2.209	1.2013	6	Protein of unknown function; non-tagged protein is detected in purified mitochondria in high-throughput studies; null mutant displays decreased frequency of mitochondrial genome loss and reduced growth rate in minimal glycerol media
SHM1	YBR263W	S000000467	0.19	1.946	0.701298	27	Mitochondrial serine hydroxymethyltransferase, converts serine to glycine plus 5,10 methylenetetrahydrofolate; involved in generating precursors for purine, pyrimidine, amino acid, and lipid biosynthesis; reverse reaction generates serine
YPT10	YBR264C	S000000468	-0.72	3.126	1.16878	7	GTP binding protein that contains the PEST signal sequence specific for proteolytic enzymes; may be involved in vesicular transport; overexpression leads to accumulation of Golgi-like cisternae with budding vesicles
TSC10	YBR265W	S000000469	-0.59	3.042	0.465354	9	3-ketosphinganine reductase, catalyzes the second step in phytosphingosine synthesis, essential for growth in the absence of exogenous dihydrosphingosine or phytosphingosine, member of short chain dehydrogenase/reductase protein family
REI1	YBR267W	S000000471	-0.1	2.416	0.384099	9	Cytoplasmic pre-60S factor; required for the correct recycling of shuttling factors Alb1, Arx1 and Tif6 at the end of the ribosomal large subunit biogenesis; involved in bud growth in the mitotic signaling network
MRPL37	YBR268W	S000000472	1.68	3.992	0.728449	1	Mitochondrial ribosomal protein of the large subunit
YBR270C	YBR270C	S000000474	-0.41	1.492	2.33019	4	Hypothetical protein
YBR271W	YBR271W	S000000475	0.3	1.372	0.882764	7	Putative S-adenosylmethionine-dependent methyltransferase of the seven beta-strand family; green fluorescent protein (GFP)-fusion protein localizes to the cytoplasm; YBR271W is not as essential gene
HSM3	YBR272C	S000000476	-0.17	2.419	1.14528	11	Protein of unknown function, involved in DNA mismatch repair during slow growth; has weak similarity to Msh1p
UBX7	YBR273C	S000000477	-0.84	2.799	0.878126	14	UBX (ubiquitin regulatory X) domain-containing protein that interacts with Cdc48p
CHK1	YBR274W	S000000478	-0.34	1.915	0.669474	4	Serine/threonine kinase and DNA damage checkpoint effector, mediates cell cycle arrest via phosphorylation of Pds1p; phosphorylated by checkpoint signal transducer Mec1p; homolog of S. pombe and mammalian Chk1 checkpoint kinase
RIF1	YBR275C	S000000479	1.09	3.386	0.862383	15	Protein that binds to the Rap1p C-terminus and acts synergistically with Rif2p to help control telomere length and establish telomeric silencing; deletion results in telomere elongation
PPS1	YBR276C	S000000480	-0.65	3.834	0.930095	4	Protein phosphatase with specificity for serine, threonine, and tyrosine residues; has a role in the DNA synthesis phase of the cell cycle
PAF1	YBR279W	S000000483	0.6	2.327	0.993884	14	RNAP II-associated protein; defines large complex biochemically and functionally distinct from the Srb-Mediator form of Pol II holoenzyme; required for full expression of a subset of cell cycle-regulated genes; homolog of human PD2/hPAF1
SAF1	YBR280C	S000000484	0.26	1.691	1.4935	11	F-Box protein involved in proteasome-dependent degradation of Aah1p during entry of cells into quiescence; interacts with Skp1
DUG2	YBR281C	S000000485	-0.43	4.085	0.824791	20	Probable di- and tri-peptidase; forms a complex with Dug1p and Dug3p to degrade glutathione (GSH) and other peptides containing a gamma-glu-X bond in an alternative pathway to GSH degradation by gamma-glutamyl transpeptidase (Ecm38p)
MRPL27	YBR282W	S000000486	0.45	2.528	1.08328	4	Mitochondrial ribosomal protein of the large subunit
SSH1	YBR283C	S000000487	-0.26	1.838	0.850746	10	Subunit of the Ssh1 translocon complex; Sec61p homolog involved in co-translational pathway of protein translocation; not essential
APE3	YBR286W	S000000490	-0.07	3.061	0.830988	18	Vacuolar aminopeptidase Y, processed to mature form by Prb1p
YBR287W	YBR287W	S000000491	0.21	1.513	2.23729	4	Protein of unknown function; green fluorescent protein (GFP)-fusion protein localizes to the ER; YBR287W is not an essential gene
APM3	YBR288C	S000000492	0.25	3.564	1.2314	15	Mu3-like subunit of the clathrin associated protein complex (AP-3); functions in transport of alkaline phosphatase to the vacuole via the alternate pathway
SNF5	YBR289W	S000000493	-0.03	3.354	0.854558	9	Subunit of the SWI/SNF chromatin remodeling complex involved in transcriptional regulation; functions interdependently in transcriptional activation with Snf2p and Snf6p
CTP1	YBR291C	S000000495	0.16	2.384	1.22306	4	Mitochondrial inner membrane citrate transporter, member of the mitochondrial carrier family
COS2	YBR302C	S000000506	0.02	2.343	3.95095	5	Protein of unknown function, member of the DUP380 subfamily of conserved, often subtelomerically-encoded proteins
RER1	YCL001W	S000000507	0.13	1.937	1.23816	5	Protein involved in retention of membrane proteins, including Sec12p, in the ER; localized to Golgi; functions as a retrieval receptor in returning membrane proteins to the ER
PGS1	YCL004W	S000000510	-0.02	3.451	1.5677	6	Phosphatidylglycerolphosphate synthase, catalyzes the synthesis of phosphatidylglycerolphosphate from CDP-diacylglycerol and sn-glycerol 3-phosphate in the first committed and rate-limiting step of cardiolipin biosynthesis
VMA9	YCL005W-A	S000028508	0.52	2.491	0.767533	3	Vacuolar H+ ATPase subunit e of the V-ATPase V0 subcomplex; essential for vacuolar acidification; interacts with the V-ATPase assembly factor Vma21p in the ER; involved in V0 biogenesis
STP22	YCL008C	S000000514	2.19	1.705	1.02142	2	Component of the ESCRT-I complex, which is involved in ubiquitin-dependent sorting of proteins into the endosome; homologous to the mouse and human Tsg101 tumor susceptibility gene; mutants exhibit a Class E Vps phenotype
ILV6	YCL009C	S000000515	-1.49	4.994	0.689394	13	Regulatory subunit of acetolactate synthase, which catalyzes the first step of branched-chain amino acid biosynthesis; enhances activity of the Ilv2p catalytic subunit, localizes to mitochondria
SGF29	YCL010C	S000000516	1.73	3.035	0.802626	5	SaGa associated Factor 29kDa; Probable 29kKDa Subunit of SAGA histone acetyltransferase complex
GBP2	YCL011C	S000000517	-1.85	4.064	0.650851	15	Poly(A+) RNA-binding protein, involved in the export of mRNAs from the nucleus to the cytoplasm; similar to Hrb1p and Npl3p; also binds single-stranded telomeric repeat sequence in vitro
YCL012C	YCL012C	S000029705	0.37	4.662	0.835204	3	Putative protein of unknown function; orthologs are present in S. bayanus, S. paradoxus and Ashbya gossypii; YCL012C is not an essential gene
BUD3	YCL014W	S000000520	0.72	4.498	0.680704	23	Protein involved in bud-site selection and required for axial budding pattern; localizes with septins to bud neck in mitosis and may constitute an axial landmark for next round of budding
DCC1	YCL016C	S000000521	-1.04	2.125	1.0101	5	Subunit of a complex with Ctf8p and Ctf18p that shares some components with Replication Factor C, required for sister chromatid cohesion and telomere length maintenance
NFS1	YCL017C	S000000522	-0.3	4.072	1.06518	13	Cysteine desulfurase involved in iron-sulfur cluster (Fe/S) biogenesis; required for the post-transcriptional thio-modification of mitochondrial and cytoplasmic tRNAs; essential protein located predominantly in mitochondria
YCL019W	YCL019W	S000000524	-2.15	2.969	3.32453	2	Retrotransposon TYA Gag and TYB Pol genes; transcribed/translated as one unit; polyprotein is processed to make a nucleocapsid-like protein (Gag), reverse transcriptase (RT), protease (PR), and integrase (IN); similar to retroviral genes
KCC4	YCL024W	S000000529	-0.3	3.838	0.746131	5	Protein kinase of the bud neck involved in the septin checkpoint, associates with septin proteins, negatively regulates Swe1p by phosphorylation, shows structural homology to bud neck kinases Gin4p and Hsl1p
AGP1	YCL025C	S000000530	-0.3	1.858	3.10372	7	Low-affinity amino acid permease with broad substrate range, involved in uptake of asparagine, glutamine, and other amino acids; expression is regulated by the SPS plasma membrane amino acid sensor system (Ssy1p-Ptr3p-Ssy5p)
HBN1	YCL026C-B	S000007548	0.59	2.826	3.95314	5	Putative protein of unknown function; similar to bacterial nitroreductases; green fluorescent protein (GFP)-fusion protein localizes to the cytoplasm and nucleus
RNQ1	YCL028W	S000000533	-0.51	2.712	0.854499	6	[PIN(+)] prion, an infectious protein conformation that is generally an ordered protein aggregate
BIK1	YCL029C	S000000534	1.05	1.894	1.16381	6	Microtubule-associated protein, component of the interface between microtubules and kinetochore, involved in sister chromatid separation; essential in polyploid cells but not in haploid or diploid cells; ortholog of mammalian CLIP-170
HIS4	YCL030C	S000000535	-0.13	3.256	0.614421	32	Multifunctional enzyme containing phosphoribosyl-ATP pyrophosphatase, phosphoribosyl-AMP cyclohydrolase, and histidinol dehydrogenase activities; catalyzes the second, third, ninth and tenth steps in histidine biosynthesis
RRP7	YCL031C	S000000536	-0.1	2.378	0.537226	5	Essential protein involved in rRNA processing and ribosome biogenesis
STE50	YCL032W	S000000537	1.04	1.713	0.956774	4	Protein involved in mating response, invasive/filamentous growth, and osmotolerance, acts as an adaptor that links G protein-associated Cdc42p-Ste20p complex to the effector Ste11p to modulate signal transduction
YCL033C	YCL033C	S000000538	0.28	2.27	1.03329	4	Putative protein-methionine-R-oxide reductase; involved in response to oxidative stress; similar to mouse Sepx1p and fly SelRp; YCL033C is not an essential gene
LSB5	YCL034W	S000000539	0.86	2.529	1.03469	11	Protein of unknown function; binds Las17p, which is a homolog of human Wiskott-Aldrich Syndrome protein involved in actin patch assembly and actin polymerization
GRX1	YCL035C	S000000540	0.07	1.65	1.64422	5	Hydroperoxide and superoxide-radical responsive heat-stable glutathione-dependent disulfide oxidoreductase with active site cysteine pair; protects cells from oxidative damage
SRO9	YCL037C	S000000542	-0.05	3.108	0.547944	16	Cytoplasmic RNA-binding protein that associates with translating ribosomes; involved in heme regulation of Hap1p as a component of the HMC complex, also involved in the organization of actin filaments; contains a La motif
GID7	YCL039W	S000000544	-0.02	3.751	1.97052	12	Protein of unknown function, involved in proteasome-dependent catabolite inactivation of fructose-1,6-bisphosphatase; contains six WD40 repeats; computational analysis suggests that Gid7p and Moh1p have similar functions
GLK1	YCL040W	S000000545	-0.75	1.838	2.96421	27	Glucokinase, catalyzes the phosphorylation of glucose at C6 in the first irreversible step of glucose metabolism; one of three glucose phosphorylating enzymes; expression regulated by non-fermentable carbon sources
PDI1	YCL043C	S000000548	1.25	3.336	2.56961	31	Protein disulfide isomerase, multifunctional protein resident in the endoplasmic reticulum lumen, essential for the formation of disulfide bonds in secretory and cell-surface proteins, unscrambles non-native disulfide bonds
MGR1	YCL044C	S000000549	-0.53	3.028	1.04304	10	Subunit, with Yme1p, of the mitochondrial inner membrane i-AAA protease complex, which is responsible for degradation of unfolded or misfolded mitochondrial gene products; required for growth of cells lacking the mitochondrial genome
YCL045C	YCL045C	S000000550	-0.37	2.661	0.817137	21	Protein of unknown function; green fluorescent protein (GFP)-fusion protein localizes to the ER; interacts with Gal80p; YCL045C is not an essential gene
YCL047C	YCL047C	S000000552	1.46	2.657	1.96919	7	Putative protein of unknown function
YCL049C	YCL049C	S000000554	-0.11	2.156	4.29587	5	Protein of unknown function; localizes to membrane fraction; YCL049C is not an essential gene;
APA1	YCL050C	S000000555	1.25	2.549	0.94632	15	Diadenosine 5',5''-P1,P4-tetraphosphate phosphorylase I (AP4A phosphorylase), involved in catabolism of bis(5'-nucleosidyl) tetraphosphates; has similarity to Apa2p
PBN1	YCL052C	S000000557	0.05	3.053	0.887627	6	Essential component of glycosylphosphatidylinositol-mannosyltransferase I, required for the autocatalytic post-translational processing of the protease B precursor Prb1p, localizes to ER in lumenal orientation; homolog of mammalian PIG-X
SPB1	YCL054W	S000000559	0.63	1.476	0.677128	13	AdoMet-dependent methyltransferase involved in rRNA processing and 60S ribosomal subunit maturation; methylates G2922 in the tRNA docking site of the large subunit rRNA and in the absence of snR52, U2921; suppressor of PAB1 mutants
KAR4	YCL055W	S000000560	-0.09	2.618	0.342008	3	Transcription factor required for gene regulation in repsonse to pheromones; also required during meiosis; exists in two forms, a slower-migrating form more abundant during vegetative growth and a faster-migrating form induced by pheromone
YCL057C-A	YCL057C-A	S000007547	0.02	2.961	1.15902	4	Putative protein of unknown function; the authentic, non-tagged protein is detected in highly purified mitochondria in high-throughput studies
PRD1	YCL057W	S000000562	0.07	2.082	1.16014	27	Zinc metalloendopeptidase, found in the cytoplasm and intermembrane space of mitochondria; with Cym1p, involved in degradation of mitochondrial proteins and of presequence peptides cleaved from imported proteins
KRR1	YCL059C	S000000564	-0.4	1.663	0.565304	12	Essential nucleolar protein required for the synthesis of 18S rRNA and for the assembly of 40S ribosomal subunit
MRC1	YCL061C	S000000566	0.03	2.79	0.536184	10	S-phase checkpoint protein found at replication forks, required for DNA replication; also required for Rad53p activation during DNA replication stress, where it forms a replication-pausing complex with Tof1p and is phosphorylated by Mec1p
CHA1	YCL064C	S000000569	0.13	1.548	0.0968503	4	Catabolic L-serine (L-threonine) deaminase, catalyzes the degradation of both L-serine and L-threonine; required to use serine or threonine as the sole nitrogen source, transcriptionally induced by serine and threonine
CDC10	YCR002C	S000000595	1.04	1.615	0.95084	10	Component of the septin ring of the mother-bud neck that is required for cytokinesis; septins recruit proteins to the neck and can act as a barrier to diffusion at the membrane, and they comprise the 10nm filaments seen with EM
MRPL32	YCR003W	S000000596	0.33	3.632	0.875118	1	Mitochondrial ribosomal protein of the large subunit
YCP4	YCR004C	S000000597	-0.6	1.648	0.924535	13	Protein of unknown function, has sequence and structural similarity to flavodoxins; the authentic, non-tagged protein is detected in highly purified mitochondria in high-throughput studies
CIT2	YCR005C	S000000598	-0.29	2.184	0.660166	12	Citrate synthase, catalyzes the condensation of acetyl coenzyme A and oxaloacetate to form citrate, peroxisomal isozyme involved in glyoxylate cycle; expression is controlled by Rtg1p and Rtg2p transcription factors
SAT4	YCR008W	S000000601	0.06	1.617	0.372032	5	Ser/Thr protein kinase involved in salt tolerance; funtions in regulation of Trk1p-Trk2p potassium transporter; partially redundant with Hal5p; has similarity to Npr1p
RVS161	YCR009C	S000000602	-0.41	2.427	1.193	16	Amphiphysin-like lipid raft protein; subunit of a complex (Rvs161p-Rvs167p) that regulates polarization of the actin cytoskeleton, endocytosis, cell polarity, cell fusion and viability following starvation or osmotic stress
ADP1	YCR011C	S000000604	-0.01	3.196	1.70764	17	Putative ATP-dependent permease of the ABC transporter family of proteins
PGK1	YCR012W	S000000605	-0.04	2.571	1.18423	44	3-phosphoglycerate kinase, catalyzes transfer of high-energy phosphoryl groups from the acyl phosphate of 1,3-bisphosphoglycerate to ADP to produce ATP; key enzyme in glycolysis and gluconeogenesis
YCR015C	YCR015C	S000000608	-0.11	1.984	1.1743	5	Putative protein of unknown function; YCR015C is not an essential gene
YCR016W	YCR016W	S000000609	-0.16	2.202	0.579789	8	Putative protein of unknown function; green fluorescent protein (GFP)-fusion protein localizes to the nucleolus and nucleus; YCR016W is not an essential gene
CWH43	YCR017C	S000000610	0.79	3.685	0.898568	4	Putative sensor/transporter protein involved in cell wall biogenesis; contains 14-16 transmembrane segments and several putative glycosylation and phosphorylation sites; null mutation is synthetically lethal with pkc1 deletion
MAK32	YCR019W	S000000612	0.25	3.044	3.59515	2	Protein necessary for structural stability of L-A double-stranded RNA-containing particles
MAK31	YCR020C-A	S000000614	-1.42	2.124	0.309144	1	Non-catalytic subunit of N-terminal acetyltransferase of the NatC type; required for replication of dsRNA virus; member of the Sm protein family
HTL1	YCR020W-B	S000006439	-0.55	2.335	0.774507	4	Component of the RSC chromatin remodeling complex; RSC functions in transcriptional regulation and elongation, chromosome stability, and establishing sister chromatid cohesion; involved in telomere maintenance
YCR023C	YCR023C	S000000617	0.71	2.696	1.46596	2	Vacuolar membrane protein of unknown function; member of the multidrug resistance family; YCR023C is not an essential gene
SLM5	YCR024C	S000000618	2.96	4.412	3.72244	4	Mitochondrial asparaginyl-tRNA synthetase
NPP1	YCR026C	S000000621	0.34	2.906	0.574767	2	Nucleotide pyrophosphatase/phosphodiesterase family member; mediates extracellular nucleotide phosphate hydrolysis along with Npp2p and Pho5p; activity and expression enhanced during conditions of phosphate starvation
RHB1	YCR027C	S000000622	0.25	3.331	0.963863	7	Putative Rheb-related GTPase involved in regulating canavanine resistance and arginine uptake; member of the Ras superfamily of G-proteins
RIM1	YCR028C-A	S000007222	-0.96	5.478	1.15053	8	Single-stranded DNA-binding protein essential for mitochondrial genome maintenance; involved in mitochondrial DNA replication
SYP1	YCR030C	S000000626	-1.51	1.548	1.19704	30	Protein with a potential role in actin cytoskeletal organization; overexpression suppresses a pfy1 (profilin) null mutation
RPS14A	YCR031C	S000000627	-0.26	1.919	0.633855	12	Ribosomal protein 59 of the small subunit, required for ribosome assembly and 20S pre-rRNA processing; mutations confer cryptopleurine resistance; nearly identical to Rps14Bp and similar to E. coli S11 and rat S14 ribosomal proteins
BPH1	YCR032W	S000000628	0.37	2.883	1.51866	7	PProtein homologous to human Chediak-Higashi syndrome and murine Beige proteins, which are implicated in disease syndromes due to defective lysosomal trafficking; mutant phenotype and genetic interactions suggest a role in protein sorting
SNT1	YCR033W	S000000629	-1.09	3.974	0.956442	12	Subunit of the Set3C deacetylase complex that interacts directly with the Set3C subunit, Sif2p; putative DNA-binding protein
FEN1	YCR034W	S000000630	-1.64	3.044	0.437423	2	Fatty acid elongase, involved in sphingolipid biosynthesis; acts on fatty acids of up to 24 carbons in length; mutations have regulatory effects on 1,3-beta-glucan synthase, vacuolar ATPase, and the secretory pathway
RRP43	YCR035C	S000000631	0.44	2.342	0.697251	8	Protein involved in rRNA processing; component of the exosome 3->5 exonuclease complex with Rrp41p, Rrp42p, Rrp4p and Dis3p; required for efficient maturation of 5.8S, 18S and 25S rRNA
RBK1	YCR036W	S000000632	-0.52	3.056	1.3093	9	Putative ribokinase
PHO87	YCR037C	S000000633	-0.13	1.558	0.797192	5	Low-affinity inorganic phosphate (Pi) transporter, involved in activation of PHO pathway; expression is independent of Pi concentration and Pho4p activity; contains 12 membrane-spanning segments
BUD5	YCR038C	S000000634	-0.63	1.095	0.824791	3	GTP/GDP exchange factor for Rsr1p (Bud1p) required for both axial and bipolar budding patterns; mutants exhibit random budding in all cell types
TAF2	YCR042C	S000000638	-0.01	1.583	1.00608	10	TFIID subunit (150 kDa), involved in RNA polymerase II transcription initiation
IMG1	YCR046C	S000000642	0.04	2.094	0.968417	3	Mitochondrial ribosomal protein of the large subunit, required for respiration and for maintenance of the mitochondrial genome
BUD23	YCR047C	S000000643	-0.28	2.555	0.450063	6	Protein involved in bud-site selection; diploid mutants display a random budding pattern instead of the wild-type bipolar pattern
ARE1	YCR048W	S000000644	-0.1	2.124	0.96835	4	Acyl-CoA:sterol acyltransferase, isozyme of Are2p; endoplasmic reticulum enzyme that contributes the major sterol esterification activity in the absence of oxygen
YCR051W	YCR051W	S000000647	1.02	3.967	0.503792	5	Putative protein of unknown function; green fluorescent protein (GFP)-fusion protein localizes to the cytoplasm and nucleus; contains ankyrin (Ank) repeats; YCR051W is not an essential gene
RSC6	YCR052W	S000000648	-1.14	2.933	0.813703	16	Component of the RSC chromatin remodeling complex; essential for mitotic growth; homolog of SWI/SNF subunit Swp73p
THR4	YCR053W	S000000649	0.05	2.03	0.757622	30	Threonine synthase, conserved protein that catalyzes formation of threonine from 0-phosphohomoserine; expression is regulated by the GCN4-mediated general amino acid control pathway
CTR86	YCR054C	S000000650	0.54	3.368	1.24298	13	Essential protein of unknown function; upstream region contains a Gcn4p responsive site suggesting a possible role in amino acid biosynthesis
PWP2	YCR057C	S000000653	0.13	3.088	0.52721	30	Conserved 90S pre-ribosomal component essential for proper endonucleolytic cleavage of the 35 S rRNA precursor at A0, A1, and A2 sites; contains eight WD-repeats; PWP2 deletion leads to defects in cell cycle and bud morphogenesis
YIH1	YCR059C	S000000655	-0.02	1.978	0.692843	5	Protein that inhibits activation of Gcn2p, an eIF2 alpha subunit protein kinase, by competing for Gcn1p binding, thus impacting gene expression in response to starvation; has sequence and functional similarity to the mouse IMPACT gene
TAH1	YCR060W	S000000656	-0.38	2.535	0.74185	3	HSP90 cofactor; interacts with Hsp82p, Pih1p, Rvb1 and Rvb2, contains a single TPR domain with at least two TPR motifs
YCR061W	YCR061W	S000000657	0.21	1.746	0.456536	5	Protein of unknown function; green fluorescent protein (GFP)-fusion protein localizes to the cytoplasm in a punctate pattern; induced by treatment with 8-methoxypsoralen and UVA irradiation
BUD31	YCR063W	S000000659	0.23	2.14	0.72199	2	Protein involved in bud-site selection; analysis of integrated high-throughput datasets predicts an involvement in RNA splicing; diploid mutants display a random budding pattern instead of the wild-type bipolar pattern
HCM1	YCR065W	S000000661	0.49	1.076	1.01147	3	Forkhead transcription factor that drives S-phase specific expression of genes involved in chromosome segregation, spindle dynamics, and budding; suppressor of calmodulin mutants with specific SPB assembly defects; telomere maintenance role
RAD18	YCR066W	S000000662	1.16	1.429	0.991236	12	Protein involved in postreplication repair; binds single-stranded DNA and has single-stranded DNA dependent ATPase activity; forms heterodimer with Rad6p; contains RING-finger motif
SED4	YCR067C	S000000663	1.08	2.76	0.897946	9	Integral endoplasmic reticulum membrane protein, functions as a positive regulator of Sar1p probably through inhibition of GTPase activation by Sec23p; binds Sec16p, participates in vesicle formation, similar to Sec12p
ATG15	YCR068W	S000000664	-1.43	4.801	2.51603	4	Lipase, required for intravacuolar lysis of autophagosomes; located in the endoplasmic reticulum membrane and targeted to intravacuolar vesicles during autophagy via the multivesicular body (MVB) pathway
CPR4	YCR069W	S000000665	-0.47	4.343	5.51993	8	Peptidyl-prolyl cis-trans isomerase (cyclophilin), catalyzes the cis-trans isomerization of peptide bonds N-terminal to proline residues; has a potential role in the secretory pathway
IMG2	YCR071C	S000000667	1.25	2.335	1.04088	5	Mitochondrial ribosomal protein of the small subunit
RSA4	YCR072C	S000000668	0.42	1.867	0.528619	11	WD-repeat protein involved in ribosome biogenesis; may interact with ribosomes; required for maturation and efficient intra-nuclear transport or pre-60S ribosomal subunits, localizes to the nucleolus
SOL2	YCR073W-A	S000000718	-0.34	1.693	1.48236	9	Protein with a possible role in tRNA export; shows similarity to 6-phosphogluconolactonase non-catalytic domains but does not exhibit this enzymatic activity; homologous to Sol1p, Sol3p, and Sol4p
YCR075W-A	YCR075W-A	S000028519	0.23	2.656	0.874936	2	Putative protein of unknown function; identified by homology to Ashbya gossypii
YCR076C	YCR076C	S000000672	-0.89	1.838	1.36396	4	Putative protein of unknown function; YCR076C is not an essential gene
PAT1	YCR077C	S000000673	0.21	3.108	1.10068	19	Topoisomerase II-associated deadenylation-dependent mRNA-decapping factor; also required for faithful chromosome transmission, maintenance of rDNA locus stability, and protection of mRNA 3'-UTRs from trimming; functionally linked to Pab1p
PTC6	YCR079W	S000002133	0.76	1.951	1.93341	4	Mitochondrial protein phosphatase of type 2C with similarity to mammalian PP1Ks; involved in mitophagy; null mutant is sensitive to rapamycin and has decreased phosphorylation of the Pda1 subunit of pyruvate dehydrogenase
SRB8	YCR081W	S000000677	0.08	3.577	1.63932	7	Subunit of the RNA polymerase II mediator complex; associates with core polymerase subunits to form the RNA polymerase II holoenzyme; essential for transcriptional regulation; involved in glucose repression
AHC2	YCR082W	S000000678	-0.89	2.762	1.13214	2	Protein of unknown function, putative transcriptional regulator; proposed to be a Ada Histone acetyltransferase complex component; GFP tagged protein is localized to the cytoplasm and nucleus
TRX3	YCR083W	S000000679	0.09	2.029	1.07382	6	Mitochondrial thioredoxin, highly conserved oxidoreductase required to maintain the redox homeostasis of the cell, forms the mitochondrial thioredoxin system with Trr2p, redox state is maintained by both Trr2p and Glr1p
TUP1	YCR084C	S000000680	0.57	3.2	0.778652	32	General repressor of transcription, forms complex with Cyc8p, involved in the establishment of repressive chromatin structure through interactions with histones H3 and H4, appears to enhance expression of some genes
CSM1	YCR086W	S000000682	0.32	4.121	0.915734	5	Nucleolar protein that forms a complex with Lrs4p which binds Mam1p at kinetochores during meiosis I to mediate accurate chromosome segregation, may be involved in premeiotic DNA replication; possible role in telomere maintenance
YCR087C-A	YCR087C-A	S000007223	-0.19	1.844	0.453257	5	Putative protein of unknown function; green fluorescent protein (GFP)-fusion protein localizes to the nucleolus; YCR087C-A is not an essential gene
ABP1	YCR088W	S000000684	0.24	2.486	1.23619	28	Actin-binding protein of the cortical actin cytoskeleton, important for activation of the Arp2/3 complex that plays a key role actin in cytoskeleton organization
YCR090C	YCR090C	S000000686	-0.03	2.805	0.826909	7	Putative protein of unknown function; green fluorescent protein (GFP)-fusion protein localizes to the cytoplasm and nucleus; YCR090C is not an essential gene
MSH3	YCR092C	S000000688	1.43	2.98	1.20468	8	Mismatch repair protein, forms dimers with Msh2p that mediate repair of insertion or deletion mutations and removal of nonhomologous DNA ends, contains a PCNA (Pol30p) binding motif required for genome stability
CDC39	YCR093W	S000000689	1.23	2.124	1.33277	54	Component of the CCR4-NOT complex, which has multiple roles in regulating mRNA levels including regulation of transcription and destabilizing mRNAs by deadenylation; basal transcription factor
CDC50	YCR094W	S000000690	0.77	1.778	0.70934	8	Endosomal protein that regulates cell polarity, controls polarized growth; similar to Ynr048wp and Lem3p
YCR095C	YCR095C	S000000691	0.58	2.134	1.01946	6	Cytoplasmic protein required for replication of Brome mosaic virus in S. cerevisiae, which is a model system for studying replication of positive-strand RNA viruses in their natural hosts
YCR102C	YCR102C	S000000699	-0.22	1.522	1.20451	2	Putative protein of unknown function; involved in copper metabolism; similar to C.carbonum toxD gene; YCR102C is not an essential gene
RDS1	YCR106W	S000000703	0.27	3.961	39.9141	2	Zinc cluster transcription factor involved in conferring resistance to cycloheximide
RMD1	YDL001W	S000002159	0.08	2.932	0.897634	9	Cytoplasmic protein required for sporulation
NHP10	YDL002C	S000002160	-0.19	2.042	1.02484	5	Protein related to mammalian high mobility group proteins; likely component of the INO80 complex, which is an ATP-dependent chromatin-remodeling complex
MCD1	YDL003W	S000002161	0.08	3.297	1.44378	12	Essential protein required for sister chromatid cohesion in mitosis and meiosis; subunit of the cohesin complex; expression is cell cycle regulated and peaks in S phase
ATP16	YDL004W	S000002162	0.41	3.356	0.943242	4	Delta subunit of the central stalk of mitochondrial F1F0 ATP synthase, which is a large, evolutionarily conserved enzyme complex required for ATP synthesis; phosphorylated
MED2	YDL005C	S000002163	1.67	3.015	0.705785	5	Subunit of the RNA polymerase II mediator complex; associates with core polymerase subunits to form the RNA polymerase II holoenzyme; essential for transcriptional regulation
PTC1	YDL006W	S000002164	-0.08	2.306	0.983638	5	Type 2C protein phosphatase (PP2C); inactivates the osmosensing MAPK cascade by dephosphorylating Hog1p; mutation delays mitochondrial inheritance; deletion reveals defects in precursor tRNA splicing, sporulation and cell separation
RPT2	YDL007W	S000002165	0.18	2.113	1.39358	17	One of six ATPases of the 19S regulatory particle of the 26S proteasome involved in the degradation of ubiquitinated substrates; required for normal peptide hydrolysis by the core 20S particle
GRX6	YDL010W	S000002168	1.38	2.953	1.15193	5	Cis-golgi localized monothiol glutaredoxin that binds an iron-sulfur cluster; more similar in activity to dithiol than other monothiol glutaredoxins; involved in the oxidative stress response; functional overlap with GRX6
YDL012C	YDL012C	S000002170	-0.26	2.382	0.616939	1	Plasma membrane protein of unknown function; YDL012C is not an essential gene
SLX5	YDL013W	S000002171	-1.39	3.218	0.144311	2	Subunit of the Slx5-Slx8 substrate-specific ubiquitin ligase complex; stimulated by prior attachment of SUMO to the substrate
NOP1	YDL014W	S000002172	0.16	1.236	0.704319	19	Nucleolar protein, component of the small subunit processome complex, which is required for processing of pre-18S rRNA; has similarity to mammalian fibrillarin
TSC13	YDL015C	S000002173	-0.22	2.362	1.24656	8	Enoyl reductase that catalyzes the last step in each cycle of very long chain fatty acid elongation, localizes to the ER, highly enriched in a structure marking nuclear-vacuolar junctions, coimmunoprecipitates with elongases Fen1p and Sur4p
CDC7	YDL017W	S000002175	0.12	2.621	1.63756	6	DDK (Dbf4-dependent kinase) catalytic subunit required for firing origins and replication fork progression in mitosis through phosphorylation of Mcm2-7p complexes and Cdc45p; kinase activity correlates with cyclical DBF4 expression
ERP3	YDL018C	S000002176	-0.3	1.6	1.2163	3	Protein with similarity to Emp24p and Erv25p, member of the p24 family involved in ER to Golgi transport
OSH2	YDL019C	S000002177	-0.15	3.047	1.21071	30	Member of an oxysterol-binding protein family with seven members in S. cerevisiae; family members have overlapping, redundant functions in sterol metabolism and collectively perform a function essential for viability
GPM2	YDL021W	S000002179	0.64	2.89	2.68421	9	Homolog of Gpm1p phosphoglycerate mutase which converts 3-phosphoglycerate to 2-phosphoglycerate in glycolysis; may be non-functional derivative of a gene duplication event
GPD1	YDL022W	S000002180	-0.16	2.555	3.91979	20	NAD-dependent glycerol-3-phosphate dehydrogenase, key enzyme of glycerol synthesis, essential for growth under osmotic stress; expression regulated by high-osmolarity glycerol response pathway; homolog of Gpd2p
YDL025C	YDL025C	S000002183	0.84	2.871	1.36075	8	Putative protein kinase, potentially phosphorylated by Cdc28p; YDL025C is not an essential gene
YDL027C	YDL027C	S000002185	-2.16	3.476	4.99921	9	Putative protein of unknown function; the authentic, non-tagged protein is detected in highly purified mitochondria in high-throughput studies; YDL027C is not an essential gene
ARP2	YDL029W	S000002187	0.09	2.328	1.14025	16	Essential component of the Arp2/3 complex, which is a highly conserved actin nucleation center required for the motility and integrity of actin patches; involved in endocytosis and membrane growth and polarity
PRP9	YDL030W	S000002188	-0.1	2.847	1.19711	4	Subunit of the SF3a splicing factor complex, required for spliceosome assembly; acts after the formation of the U1 snRNP-pre-mRNA complex
DBP10	YDL031W	S000002189	-0.54	3.704	0.835551	27	Putative ATP-dependent RNA helicase of the DEAD-box protein family, constituent of 66S pre-ribosomal particles; essential protein involved in ribosome biogenesis
SLM3	YDL033C	S000002191	-2.91	2.587	1.44373	3	tRNA-specific 2-thiouridylase, responsible for 2-thiolation of the wobble base of mitochondrial tRNAs; human ortholog is implicated in myoclonus epilepsy associated with ragged red fibers (MERRF)
GPR1	YDL035C	S000002193	0.55	3.378	1.13505	3	Plasma membrane G protein coupled receptor (GPCR) that interacts with the heterotrimeric G protein alpha subunit, Gpa2p, and with Plc1p; sensor that integrates nutritional signals with the modulation of cell fate via PKA and cAMP synthesis
NAT1	YDL040C	S000002198	0.55	4.117	0.798049	40	Subunit of the N-terminal acetyltransferase NatA (Nat1p, Ard1p, Nat5p); N-terminally acetylates many proteins, which influences multiple processes such as the cell cycle, heat-shock resistance, mating, sporulation, and telomeric silencing
SIR2	YDL042C	S000002200	-0.51	3.257	1.11361	7	Conserved NAD+ dependent histone deacetylase of the Sirtuin family involved in regulation of lifespan; plays roles in silencing at HML, HMR, telomeres, and the rDNA locus; negatively regulates initiation of DNA replication
PRP11	YDL043C	S000002201	0.04	2.419	0.519034	3	Subunit of the SF3a splicing factor complex, required for spliceosome assembly
MTF2	YDL044C	S000002202	1.26	4.298	1.40537	8	Mitochondrial matrix protein that interacts with an N-terminal region of mitochondrial RNA polymerase (Rpo41p) and couples RNA processing and translation to transcription
FAD1	YDL045C	S000002203	0.99	1.827	1.15605	6	Flavin adenine dinucleotide (FAD) synthetase, performs the second step in synthesis of FAD from riboflavin
MRP10	YDL045W-A	S000006430	-0.04	1.414	0.714126	2	Mitochondrial ribosomal protein of the small subunit
NPC2	YDL046W	S000002204	0.46	2.028	0.948421	2	Functional homolog of human NPC2/He1, which is a cholesterol-binding protein whose deficiency causes Niemann-Pick type C2 disease involving retention of cholesterol in lysosomes
SIT4	YDL047W	S000002205	-0.37	3.139	0.813436	14	Type 2A-related serine-threonine phosphatase that functions in the G1/S transition of the mitotic cycle; cytoplasmic and nuclear protein that modulates functions mediated by Pkc1p including cell wall and actin cytoskeleton organization
LHP1	YDL051W	S000002209	-1.2	2.051	0.654198	15	RNA binding protein required for maturation of tRNA and snRNA precursors; acts as a molecular chaperone for RNAs transcribed by polymerase III; homologous to human La (SS-B) autoantigen
SLC1	YDL052C	S000002210	-2.3	2.988	1.36509	15	1-acyl-sn-gylcerol-3-phosphate acyltransferase, catalyzes the acylation of lysophosphatidic acid to form phosphatidic acid, a key intermediate in lipid metabolism; enzymatic activity detected in lipid particles and microsomes
PBP4	YDL053C	S000002211	-0.98	2.216	0.645964	10	Pbp1p binding protein, interacts strongly with Pab1p-binding protein 1 (Pbp1p) in the yeast two-hybrid system; also interacts with Lsm12p in a copurification assay
MCH1	YDL054C	S000002212	-0.08	2.238	0.951055	3	Protein with similarity to mammalian monocarboxylate permeases, which are involved in transport of monocarboxylic acids across the plasma membrane; mutant is not deficient in monocarboxylate transport
PSA1	YDL055C	S000002213	0.5	1.745	1.08065	20	GDP-mannose pyrophosphorylase (mannose-1-phosphate guanyltransferase), synthesizes GDP-mannose from GTP and mannose-1-phosphate in cell wall biosynthesis; required for normal cell wall structure
MBP1	YDL056W	S000002214	-0.49	1.544	1.13022	8	Transcription factor involved in regulation of cell cycle progression from G1 to S phase, forms a complex with Swi6p that binds to MluI cell cycle box regulatory element in promoters of DNA synthesis genes
YDL057W	YDL057W	S000002215	-3.05	3.54	1.2441	3	Putative protein of unknown function; YDL057W is not an essential gene
USO1	YDL058W	S000002216	-0.55	2.021	1.13851	42	Essential protein involved in intracellular protein transport, coiled-coil protein necessary for transport from ER to Golgi; required for assembly of the ER-to-Golgi SNARE complex
TSR1	YDL060W	S000002218	0.71	2.147	0.714547	23	Protein required for processing of 20S pre-rRNA in the cytoplasm, associates with pre-40S ribosomal particles
RPS29B	YDL061C	S000002219	0.74	2.489	0.549123	5	Protein component of the small (40S) ribosomal subunit; nearly identical to Rps29Ap and has similarity to rat S29 and E. coli S14 ribosomal proteins
YDL063C	YDL063C	S000002221	0.19	4.14	0.850068	8	Putative protein of unknown function; green fluorescent protein (GFP)-fusion protein localizes to the cytoplasm and nucleus; YDL063C is not an essential gene
UBC9	YDL064W	S000002222	-0.38	1.945	0.935234	3	SUMO-conjugating enzyme involved in the Smt3p conjugation pathway; nuclear protein required for S- and M-phase cyclin degradation and mitotic control; involved in proteolysis mediated by the anaphase-promoting complex cyclosome (APCC)
PEX19	YDL065C	S000002223	-0.39	2.237	0.930353	16	Chaperone and import receptor for newly-synthesized class I peroxisomal membrane proteins (PMPs), binds PMPs in the cytoplasm and delivers them to the peroxisome for subsequent insertion into the peroxisomal membrane
IDP1	YDL066W	S000002224	-0.04	2.069	0.840226	28	Mitochondrial NADP-specific isocitrate dehydrogenase, catalyzes the oxidation of isocitrate to alpha-ketoglutarate; not required for mitochondrial respiration and may function to divert alpha-ketoglutarate to biosynthetic processes
COX9	YDL067C	S000002225	-0.32	1.435	1.12967	2	Subunit VIIa of cytochrome c oxidase, which is the terminal member of the mitochondrial inner membrane electron transport chain
BDF2	YDL070W	S000002228	-0.47	2.036	0.805078	3	Protein involved in transcription initiation at TATA-containing promoters; associates with the basal transcription factor TFIID; contains two bromodomains; corresponds to the C-terminal region of mammalian TAF1; redundant with Bdf1p
YET3	YDL072C	S000002230	0.78	1.655	1.89064	12	Protein of unknown function; YET3 null mutant decreases the level of secreted invertase; homolog of human BAP31 protein
YDL073W	YDL073W	S000002231	1.37	2.286	0.990274	5	Putative protein of unknown function; YDL073W is not an essential gene
BRE1	YDL074C	S000002232	-0.31	1.919	0.720415	28	E3 ubiquitin ligase for Rad6p, required for the ubiquitination of histone H2B, recruitment of Rad6p to promoter chromatin and subsequent methylation of histone H3 (on K4 and K79), contains RING finger domain
RPL31A	YDL075W	S000002233	-0.47	1.396	0.661081	8	Protein component of the large (60S) ribosomal subunit, nearly identical to Rpl31Bp and has similarity to rat L31 ribosomal protein; associates with the karyopherin Sxm1p
RXT3	YDL076C	S000002234	0.5	2.817	0.818753	5	Subunit of the RPD3L complex; involved in histone deacetylation
VAM6	YDL077C	S000002235	0.22	1.784	1.68398	14	Vacuolar protein that plays a critical role in the tethering steps of vacuolar membrane fusion by facilitating guanine nucleotide exchange on small guanosine triphosphatase Ypt7p
MDH3	YDL078C	S000002236	0.1	2.111	1.00772	21	Peroxisomal malate dehydrogenase, catalyzes interconversion of malate and oxaloacetate; involved in the glyoxylate cycle
THI3	YDL080C	S000002238	-0.24	1.739	1.18657	3	Probable alpha-ketoisocaproate decarboxylase, may have a role in catabolism of amino acids to long-chain and complex alcohols; required for expression of enzymes involved in thiamine biosynthesis
RPP1A	YDL081C	S000002239	-0.16	2.035	0.573951	2	Ribosomal stalk protein P1 alpha, involved in the interaction between translational elongation factors and the ribosome; accumulation of P1 in the cytoplasm is regulated by phosphorylation and interaction with the P2 stalk component
RPL13A	YDL082W	S000002240	-0.86	2.097	0.559302	13	Protein component of the large (60S) ribosomal subunit, nearly identical to Rpl13Bp; not essential for viability; has similarity to rat L13 ribosomal protein
RPS16B	YDL083C	S000002241	-1.99	3.171	0.593451	15	Protein component of the small (40S) ribosomal subunit; identical to Rps16Ap and has similarity to E. coli S9 and rat S16 ribosomal proteins
SUB2	YDL084W	S000002242	-0.24	5.221	1.06363	29	Component of the TREX complex required for nuclear mRNA export; member of the DEAD-box RNA helicase superfamily and is involved in early and late steps of spliceosome assembly; homolog of the human splicing factor hUAP56
YDL085C-A	YDL085C-A	S000007588	-0.1	3.246	0.944158	1	Putative protein of unknown function; green fluorescent protein (GFP)-fusion protein localizes to the cytoplasm and nucleus
NDE2	YDL085W	S000002243	1.87	3.748	4.83093	6	Mitochondrial external NADH dehydrogenase, catalyzes the oxidation of cytosolic NADH; Nde1p and Nde2p are involved in providing the cytosolic NADH to the mitochondrial respiratory chain
YDL086W	YDL086W	S000002244	-0.26	3.627	1.03677	12	Putative protein of unknown function; the authentic, non-tagged protein is detected in highly purified mitochondria in high-throughput studies; YDL086W is not an essential gene
LUC7	YDL087C	S000002245	-1.85	2.642	0.538269	3	Essential protein associated with the U1 snRNP complex; splicing factor involved in recognition of 5' splice site; contains two zinc finger motifs; N-terminal zinc finger binds pre-mRNA
ASM4	YDL088C	S000002246	4.21	3.671	0.986369	10	Nuclear pore complex subunit, part of a subcomplex also containing Nup53p, Nup170p, and Pse1p
YDL089W	YDL089W	S000002247	-2.29	3.996	1.04529	4	Protein of unknown function; interacts with meiotic division protein Csm1p; green fluorescent protein (GFP)-fusion protein localizes to the nuclear periphery, potential Cdc28p substrate
RAM1	YDL090C	S000002248	0.01	1.315	0.64508	10	Beta subunit of the CAAX farnesyltransferase (FTase) that prenylates the a-factor mating pheromone and Ras proteins; required for the membrane localization of Ras proteins and a-factor; homolog of the mammalian FTase beta subunit
UBX3	YDL091C	S000002249	-1.57	2.9	1.37521	6	UBX (ubiquitin regulatory X) domain-containing protein that interacts with Cdc48p, green fluorescent protein (GFP)-fusion protein localizes to the cytoplasm in a punctate pattern
SRP14	YDL092W	S000002250	0.43	2.386	0.88177	6	Signal recognition particle (SRP) subunit, interacts with the RNA component of SRP to form the Alu domain, which is the region of SRP responsible for arrest of nascent chain elongation during membrane targeting; homolog of mammalian SRP14
PMT5	YDL093W	S000002251	0.57	3.252	1.30722	4	Protein O-mannosyltransferase, transfers mannose residues from dolichyl phosphate-D-mannose to protein serine/threonine residues; acts in a complex with Pmt3p, can instead interact with Pmt2p in some conditions; target for new antifungals
PMT1	YDL095W	S000002253	-0.31	1.313	1.20949	19	Protein O-mannosyltransferase, transfers mannose residues from dolichyl phosphate-D-mannose to protein serine/threonine residues; acts in a complex with Pmt2p, can instead interact with Pmt3p in some conditions; target for new antifungals
RPN6	YDL097C	S000002255	2.51	4.607	1.79664	16	Essential, non-ATPase regulatory subunit of the 26S proteasome lid required for the assembly and activity of the 26S proteasome; the human homolog (S9 protein) partially rescues Rpn6p depletion
SNU23	YDL098C	S000002256	1.38	2.373	0.843406	6	Component of U4/U6.U5 snRNP involved in mRNA splicing via spliceosome
BUG1	YDL099W	S000002257	0.3	2.775	0.98473	9	Cis-golgi localized protein involved in ER to Golgi transport; forms a complex with the mammalian GRASP65 homolog, Grh1p; mutants are compromised for the fusion of ER-derived vesicles with Golgi membranes
GET3	YDL100C	S000002258	-0.34	4.853	1.25819	16	Guanine nucleotide exchange factor for Gpa1p; amplifies G protein signaling; subunit of the GET complex, which is involved in Golgi to ER trafficking; has low-level ATPase activity and is involved in resistance to heat and metal stress
DUN1	YDL101C	S000002259	0.82	4.939	1.12842	9	Cell-cycle checkpoint serine-threonine kinase required for DNA damage-induced transcription of certain target genes, phosphorylation of Rad55p and Sml1p, and transient G2/M arrest after DNA damage; also regulates postreplicative DNA repair
POL3	YDL102W	S000002260	0.37	3.509	1.29594	23	Catalytic subunit of DNA polymerase delta; required for chromosomal DNA replication during mitosis and meiosis, intragenic recombination, repair of double strand DNA breaks, and DNA replication during nucleotide excision repair (NER)
QRI1	YDL103C	S000002261	-0.09	1.753	1.43609	30	UDP-N-acetylglucosamine pyrophosphorylase, catalyzes the formation of UDP-N-acetylglucosamine (UDP-GlcNAc), which is important in cell wall biosynthesis, protein N-glycosylation, and GPI anchor biosynthesis
NSE4	YDL105W	S000002263	-0.68	1.11	0.954092	3	Nuclear protein that plays a role in the function of the Smc5p-Rhc18p complex
PHO2	YDL106C	S000002264	-0.72	3.007	1.26804	6	Homeobox transcription factor; regulatory targets include genes involved in phosphate metabolism; binds cooperatively with Pho4p to the PHO5 promoter; phosphorylation of Pho2p facilitates interaction with Pho4p
MSS2	YDL107W	S000002265	-0.37	2.161	1.93502	2	Peripherally bound inner membrane protein of the mitochondrial matrix involved in membrane insertion of C-terminus of Cox2p, interacts genetically and physically with Cox18p
KIN28	YDL108W	S000002266	1.76	4.309	1.15553	6	Serine/threonine protein kinase, subunit of the transcription factor TFIIH; involved in transcription initiation at RNA polymerase II promoters
TMA17	YDL110C	S000002268	-0.02	3.388	3.46751	5	Protein of unknown function that associates with ribosomes
RRP42	YDL111C	S000002269	0.16	3.081	0.65738	3	Protein involved in rRNA processing; component of the exosome 3->5 exonuclease complex with Rrp4p, Rrp41p, Rrp43p and Dis3p
TRM3	YDL112W	S000002270	-0.37	3.949	1.01299	42	2'-O-ribose methyltransferase, catalyzes the ribose methylation of the guanosine nucleotide at position 18 of tRNAs
ATG20	YDL113C	S000002271	1.45	2.293	2.20274	11	Sorting nexin family member required for the cytoplasm-to-vacuole targeting (Cvt) pathway and for endosomal sorting; has a Phox homology domain that binds phosphatidylinositol-3-phosphate; interacts with Snx4p; potential Cdc28p substrate
NUP84	YDL116W	S000002274	-0.07	2.293	1.06253	11	Subunit of the nuclear pore complex (NPC), forms a subcomplex with Nup85p, Nup120p, Nup145p-C, Sec13p, and Seh1p that plays a role in nuclear mRNA export and NPC biogenesis
CYK3	YDL117W	S000002275	0.73	3.181	0.647679	10	SH3-domain protein located in the mother-bud neck and the cytokinetic actin ring; mutant phenotype and genetic interactions suggest a role in cytokinesis
YDL119C	YDL119C	S000002277	0.52	2.475	1.30686	6	Putative mitochondrial transport protein; GFP-fusion protein is induced in response to the DNA-damaging agent MMS; the authentic, non-tagged protein is detected in purified mitochondria
YFH1	YDL120W	S000002278	-2.74	3.563	0.628289	3	Frataxin, regulates mitochondrial iron accumulation; interacts with Isu1p which promotes Fe-S cluster assembly; interacts with electron transport chain components and may influence respiration; human homolog involved in Friedrich's ataxia
YDL121C	YDL121C	S000002279	-0.36	2.309	0.540812	3	Putative protein of unknown function; green fluorescent protein (GFP)-fusion protein localizes to the endoplasmic retiuculum; YDL121C is not an essential protein
UBP1	YDL122W	S000002280	1.1	3.692	0.844342	21	Ubiquitin-specific protease that removes ubiquitin from ubiquitinated proteins; cleaves at the C terminus of ubiquitin fusions irrespective of their size; capable of cleaving polyubiquitin chains
SNA4	YDL123W	S000002281	-0.13	3.765	1.94835	2	Protein of unknown function, localized to the vacuolar outer membrane
YDL124W	YDL124W	S000002282	0.58	2.331	4.52056	26	NADPH-dependent alpha-keto amide reductase; reduces aromatic alpha-keto amides, aliphatic alpha-keto esters, and aromatic alpha-keto esters; member of the aldo-keto reductase (AKR) family
HNT1	YDL125C	S000002283	-0.44	2.724	0.413025	5	Adenosine 5'-monophosphoramidase; interacts physically and genetically with Kin28p, a CDK and TFIIK subunit, and genetically with CAK1; member of the histidine triad (HIT) superfamily of nucleotide-binding proteins and similar to Hint
CDC48	YDL126C	S000002284	-1.99	1.67	1.14683	56	ATPase in ER, nuclear membrane and cytosol with homology to mammalian p97; in a complex with Npl4p and Ufd1p participates in retrotranslocation of ubiquitinated proteins from the ER into the cytosol for degradation by the proteasome
VCX1	YDL128W	S000002286	-0.18	3.66	1.10615	2	Vacuolar H+/Ca2+ exchanger involved in control of cytosolic Ca2+ concentration; has similarity to sodium/calcium exchangers, including the bovine Na+/Ca2+,K+ antiporter
RPP1B	YDL130W	S000002288	1.86	2.637	0.543603	2	Ribosomal protein P1 beta, component of the ribosomal stalk, which is involved in interaction of translational elongation factors with ribosome; accumulation is regulated by phosphorylation and interaction with the P2 stalk component
STF1	YDL130W-A	S000007232	0.05	1.614	2.15382	3	Protein involved in regulation of the mitochondrial F1F0-ATP synthase; Stf1p and Stf2p may act as stabilizing factors that enhance inhibitory action of the Inh1p protein
LYS21	YDL131W	S000002289	-0.38	1.5	0.848831	22	Homocitrate synthase isozyme, catalyzes the condensation of acetyl-CoA and alpha-ketoglutarate to form homocitrate, which is the first step in the lysine biosynthesis pathway; highly similar to the other isozyme, Lys20p
CDC53	YDL132W	S000002290	0.23	3.721	1.8474	29	Cullin, structural protein of SCF complexes (which also contain Skp1p, Cdc34p, Hrt1p and an F-box protein) involved in ubiquitination; SCF promotes the G1-S transition by targeting G1 cyclins and the Cln-CDK inhibitor Sic1p for degradation
YDL133W	YDL133W	S000002291	-0.63	2.686	0.936532	3	Putative protein of unknown function
PPH21	YDL134C	S000002292	-0.16	2.736	1.04117	12	Catalytic subunit of protein phosphatase 2A, functionally redundant with Pph22p; methylated at C terminus; forms alternate complexes with several regulatory subunits; involved in signal transduction and regulation of mitosis
RDI1	YDL135C	S000002294	-0.46	1.493	0.927632	8	Rho GDP dissociation inhibitor involved in the localization and regulation of Cdc42p
RPL35B	YDL136W	S000002295	-0.45	3.827	0.624295	12	Protein component of the large (60S) ribosomal subunit, identical to Rpl35Ap and has similarity to rat L35 ribosomal protein
ARF2	YDL137W	S000002296	-1.88	4.696	1.35116	12	ADP-ribosylation factor, GTPase of the Ras superfamily involved in regulation of coated formation vesicles in intracellular trafficking within the Golgi; functionally interchangeable with Arf1p
SCM3	YDL139C	S000002298	-0.06	2.537	0.741568	3	Nonhistone component of centromeric chromatin that binds stoichiometrically to CenH3-H4 histones, required for kinetochore assembly; contains nuclear export signal (NES); required for G2/M progression and localization of Cse4p
RPO21	YDL140C	S000002299	0.93	2.022	0.732703	61	RNA polymerase II largest subunit B220, part of central core; phosphorylation of C-terminal heptapeptide repeat domain regulates association with transcription and splicing factors; similar to bacterial beta-prime
BPL1	YDL141W	S000002300	-0.71	4.037	1.0946	17	Biotin:apoprotein ligase, covalently modifies proteins with the addition of biotin, required for acetyl-CoA carboxylase (Acc1p) holoenzyme formation
CCT4	YDL143W	S000002302	0.14	1.575	0.969223	24	Subunit of the cytosolic chaperonin Cct ring complex, related to Tcp1p, required for the assembly of actin and tubulins in vivo
YDL144C	YDL144C	S000002303	-0.51	3.879	0.946156	11	Putative protein of unknown function; green fluorescent protein (GFP)-fusion protein localizes to the cytoplasm and nucleus; YDL144C is not an essential gene.
COP1	YDL145C	S000002304	0.5	2.157	1.58216	55	Alpha subunit of COPI vesicle coatomer complex, which surrounds transport vesicles in the early secretory pathway
LDB17	YDL146W	S000002305	-0.1	1.945	1.99674	6	Protein of unknown function; GFP-fusion protein localizes to the cell periphery, cytoplasm, bud, and bud neck; null mutant shows a reduced affinity for the alcian blue dye suggesting a decreased net negative charge of the cell surface
RPN5	YDL147W	S000002306	0.34	1.551	1.70598	20	Essential, non-ATPase regulatory subunit of the 26S proteasome lid, similar to mammalian p55 subunit and to another S. cerevisiae regulatory subunit, Rpn7p
NOP14	YDL148C	S000002307	1.2	2.794	0.570639	16	Nucleolar protein, forms a complex with Noc4p that mediates maturation and nuclear export of 40S ribosomal subunits; also present in the small subunit processome complex, which is required for processing of pre-18S rRNA
ATG9	YDL149W	S000002308	0.77	1.472	11.953	5	Transmembrane protein involved in formation of Cvt and autophagic vesicles; cycles between the pre-autophagosomal structure and other cytosolic punctate structures, not found in autophagosomes
RPC53	YDL150W	S000002309	0.55	3.863	0.661609	10	RNA polymerase III subunit C53
SAS10	YDL153C	S000002312	0.9	2.245	0.444614	14	Component of the small (ribosomal) subunit (SSU) processosome required for pre-18S rRNa processing; essential nucleolar protein that, when overproduced, disrupts silencing
CLB3	YDL155W	S000002314	-0.81	2.03	4.30765	5	B-type cyclin involved in cell cycle progression; activates Cdc28p to promote the G2/M transition; may be involved in DNA replication and spindle assembly; accumulates during S phase and G2, then targeted for ubiquitin-mediated degradation
YDL156W	YDL156W	S000002315	-0.08	3.516	0.786054	9	Putative protein of unknown function; protein sequence contains three WD domains (WD-40 repeat); green fluorescent protein (GFP)-fusion protein localizes to the cytoplasm and nucleus
YDL157C	YDL157C	S000002316	1.99	2.174	0.69863	3	Putative protein of unknown function; the authentic, non-tagged protein is detected in highly purified mitochondria in high-throughput studies
STE7	YDL159W	S000002318	-0.89	3.9	1.23508	5	Signal transducing MAP kinase kinase involved in pheromone response, where it phosphorylates Fus3p, and in the pseudohyphal/invasive growth pathway, through phosphorylation of Kss1p; phosphorylated by Ste11p, degraded by ubiquitin pathway
DHH1	YDL160C	S000002319	-0.3	2.29	1.33682	17	Cytoplasmic DExD/H-box helicase, stimulates mRNA decapping, coordinates distinct steps in mRNA function and decay, interacts with both the decapping and deadenylase complexes, may have a role in mRNA export and translation
YDL160C-A	YDL160C-A	S000028520	0.58	2.758	1.37361	2	Putative protein of unknown function
ENT1	YDL161W	S000002320	0.16	2.72	1.09844	10	Epsin-like protein involved in endocytosis and actin patch assembly and functionally redundant with Ent2p; binds clathrin via a clathrin-binding domain motif at C-terminus
CDC9	YDL164C	S000002323	-1.25	3.026	1.48545	11	DNA ligase found in the nucleus and mitochondria, an essential enzyme that joins Okazaki fragments during DNA replication; also acts in nucleotide excision repair, base excision repair, and recombination
CDC36	YDL165W	S000002324	-0.74	3.997	0.970399	6	Component of the CCR4-NOT complex, which has multiple roles in regulating mRNA levels including regulation of transcription and destabilizing mRNAs by deadenylation; basal transcription factor
FAP7	YDL166C	S000002325	-0.23	4.513	0.871758	9	Essential NTPase required for small ribosome subunit synthesis, mediates processing of the 20S pre-rRNA at site D in the cytoplasm but associates only transiently with 43S preribosomes via Rps14p, may be the endonuclease for site D
NRP1	YDL167C	S000002326	0.48	4.483	0.446955	11	Protein of unknown function, rich in asparagine residues
SFA1	YDL168W	S000002327	0.01	1.579	0.981323	15	Bifunctional enzyme containing both alcohol dehydrogenase and glutathione-dependent formaldehyde dehydrogenase activities, functions in formaldehyde detoxification and formation of long chain and complex alcohols, regulated by Hog1p-Sko1p
UGA3	YDL170W	S000002329	-0.28	4.423	2.23612	3	Transcriptional activator necessary for gamma-aminobutyrate (GABA)-dependent induction of GABA genes (such as UGA1, UGA2, UGA4); zinc-finger transcription factor of the Zn(2)-Cys(6) binuclear cluster domain type; localized to the nucleus
GLT1	YDL171C	S000002330	-2.35	4.938	0.621941	80	NAD(+)-dependent glutamate synthase (GOGAT), synthesizes glutamate from glutamine and alpha-ketoglutarate; with Gln1p, forms the secondary pathway for glutamate biosynthesis from ammonia; expression regulated by nitrogen source
YDL173W	YDL173W	S000002332	0.12	4.325	1.36751	6	Putative protein of unknown function; green fluorescent protein (GFP)-fusion protein localizes to the cytoplasm; YDL173W is not an essential gene
DLD1	YDL174C	S000002333	-0.12	4.301	1.71398	21	D-lactate dehydrogenase, oxidizes D-lactate to pyruvate, transcription is heme-dependent, repressed by glucose, and derepressed in ethanol or lactate; located in the mitochondrial inner membrane
AIR2	YDL175C	S000002334	1.74	3.552	0.777277	7	RING finger protein that interacts with the arginine methyltransferase Hmt1p; may regulate methylation of Npl3p, which modulates Npl3p function in mRNA processing and export; has similarity to Air1p
YDL177C	YDL177C	S000002336	1.05	2.704	0.989108	2	Putative protein of unknown function; similar to the mouse IMPACT gene; YDL177C is not an essential gene
DLD2	YDL178W	S000002337	0.71	1.846	1.20717	18	D-lactate dehydrogenase, located in the mitochondrial matrix
YDL180W	YDL180W	S000002339	0.2	2.257	1.08798	2	Putative protein of unknown function; green fluorescent protein (GFP)-fusion protein localizes to the vacuole
INH1	YDL181W	S000002340	-0.5	2.045	1.03036	4	Protein that inhibits ATP hydrolysis by the F1F0-ATP synthase; inhibitory function is enhanced by stabilizing proteins Stf1p and Stf2p; has similarity to Stf1p; has a calmodulin-binding motif and binds calmodulin in vitro
LYS20	YDL182W	S000002341	-0.19	2.568	0.473915	5	Homocitrate synthase isozyme, catalyzes the condensation of acetyl-CoA and alpha-ketoglutarate to form homocitrate, which is the first step in the lysine biosynthesis pathway; highly similar to the other isozyme, Lys21p
YDL183C	YDL183C	S000002342	0.32	1.384	1.47744	2	Putative protein of unknown function; YDL183C is not an essential gene
TFP1	YDL185W	S000002344	-0.43	1.13	0.798963	70	Vacuolar ATPase V1 domain subunit A containing the catalytic nucleotide binding sites; protein precursor undergoes self-catalyzed splicing to yield the extein Tfp1p and the intein Vde (PI-SceI), which is a site-specific endonuclease
PPH22	YDL188C	S000002347	0.52	1.603	0.99711	2	Catalytic subunit of protein phosphatase 2A, functionally redundant with Pph21p; methylated at C terminus; forms alternate complexes with several regulatory subunits; involved in signal transduction and regulation of mitosis
RBS1	YDL189W	S000002348	0.45	2.79	1.03197	6	Protein of unknown function, identified as a high copy suppressor of psk1 psk2 mutations that confer temperature-sensitivity for galactose utilization; proposed to bind single-stranded nucleic acids via its R3H domain
UFD2	YDL190C	S000002349	1.12	1.32	1.73327	25	Ubiquitin chain assembly factor (E4) that cooperates with a ubiquitin-activating enzyme (E1), a ubiquitin-conjugating enzyme (E2), and a ubiquitin protein ligase (E3) to conjugate ubiquitin to substrates; also functions as an E3
ARF1	YDL192W	S000002351	-0.07	4.205	1.15493	4	ADP-ribosylation factor, GTPase of the Ras superfamily involved in regulation of coated vesicle formation in intracellular trafficking within the Golgi; functionally interchangeable with Arf2p
NUS1	YDL193W	S000002352	-0.04	2.353	2.59692	9	Prenyltransferase, required for cell viability; involved in protein trafficking
SNF3	YDL194W	S000002353	-0.21	2.067	0.399758	1	Plasma membrane glucose sensor that regulates glucose transport; has 12 predicted transmembrane segments; long cytoplasmic C-terminal tail is required for low glucose induction of hexose transporter genes HXT2 and HXT4
SEC31	YDL195W	S000002354	-0.58	2.627	1.08983	41	Essential phosphoprotein component (p150) of the COPII coat of secretory pathway vesicles, in complex with Sec13p; required for ER-derived transport vesicle formation
GGC1	YDL198C	S000002357	-1.26	1.063	1.43455	15	Mitochondrial GTP/GDP transporter, essential for mitochondrial genome maintenance; has a role in mitochondrial iron transport; member of the mitochondrial carrier family
YDL199C	YDL199C	S000002358	-0.78	4.722	2.5865	4	Putative transporter, member of the sugar porter family
TRM8	YDL201W	S000002360	-0.01	3.861	0.563144	12	Subunit of a tRNA methyltransferase complex composed of Trm8p and Trm82p that catalyzes 7-methylguanosine modification of tRNA
MRPL11	YDL202W	S000002361	0.87	1.978	1.03785	8	Mitochondrial ribosomal protein of the large subunit
YDL203C	YDL203C	S000002362	-0.07	1.6	0.999238	6	Putative protein of unknown function; GFP-fusion protein expression is induced in response to the DNA-damaging agent MMS; the authentic, non-tagged protein is detected in purified mitochondria
RTN2	YDL204W	S000002363	-0.63	1.224	4.75189	13	Protein of unknown function; has similarity to mammalian reticulon proteins; member of the RTNLA (reticulon-like A) subfamily
HEM3	YDL205C	S000002364	1.3	3.908	0.612465	9	Phorphobilinogen deaminase, catalyzes the conversion of 4-porphobilinogen to hydroxymethylbilane, the third step in the heme biosynthetic pathway; localizes to both the cytoplasm and nucleus; expression is regulated by Hap2p-Hap3p
GLE1	YDL207W	S000002366	-0.93	4.168	1.15217	5	Cytoplasmic nucleoporin required for polyadenylated RNA export but not for protein import; component of Nup82p nuclear pore subcomplex; contains a nuclear export signal
NHP2	YDL208W	S000002367	0.03	2.189	0.545622	4	Nuclear protein related to mammalian high mobility group (HMG) proteins, essential for function of H/ACA-type snoRNPs, which are involved in 18S rRNA processing
CWC2	YDL209C	S000002368	-0.5	1.873	0.875513	5	Protein involved in pre-mRNA splicing, component of a complex containing Cef1p; interacts with Prp19p; contains an RNA recognition motif; has similarity to S. pombe Cwf2p
SHR3	YDL212W	S000002371	-0.43	3.687	0.501736	2	Endoplasmic reticulum packaging chaperone, required for incorporation of amino acid permeases into COPII coated vesicles for transport to the cell surface
NOP6	YDL213C	S000002372	-0.24	4.315	0.624035	7	Putative RNA-binding protein implicated in ribosome biogenesis; contains an RNA recognition motif (RRM) and has similarity to hydrophilins; NOP6 may be a fungal-specific gene as no homologs have been yet identified in higher eukaryotes
GDH2	YDL215C	S000002374	0.19	3.652	2.74737	30	NAD(+)-dependent glutamate dehydrogenase, degrades glutamate to ammonia and alpha-ketoglutarate; expression sensitive to nitrogen catabolite repression and intracellular ammonia levels
RRI1	YDL216C	S000002375	-0.45	2.636	1.09977	3	Catalytic subunit of the COP9 signalosome (CSN) complex that acts as an isopeptidase in cleaving the ubiquitin-like protein Nedd8 from SCF ubiquitin ligases; metalloendopeptidase involved in the adaptation to pheromone signaling
TIM22	YDL217C	S000002376	-0.14	2.949	1.21285	3	Component of the mitochondrial Tim54p-Tim22p complex involved in insertion of polytopic proteins into the inner membrane
DTD1	YDL219W	S000002378	0.12	1.747	0.817279	4	D-Tyr-tRNA(Tyr) deacylase, functions in protein translation, may affect nonsense suppression via alteration of the protein synthesis machinery; ubiquitous among eukaryotes
CDC13	YDL220C	S000002379	-1.02	1.848	1.35238	5	Single stranded DNA-binding protein found at TG1-3 telomere G-tails; regulates telomere replication through recruitment of specific sub-complexes, but the essential function is telomere capping
FMP45	YDL222C	S000002381	-0.53	3.615	9.67392	5	Integral membrane protein localized to mitochondria (untagged protein) and eisosomes, immobile patches at the cortex associated with endocytosis; sporulation and sphingolipid content are altered in mutants; has homologs SUR7 and YNL194C
HBT1	YDL223C	S000002382	1.07	4.124	4.05682	44	Substrate of the Hub1p ubiquitin-like protein that localizes to the shmoo tip (mating projection); mutants are defective for mating projection formation, thereby implicating Hbt1p in polarized cell morphogenesis
WHI4	YDL224C	S000002383	0.89	4.325	0.813323	12	Putative RNA binding protein and partially redundant Whi3p homolog that regulates the cell size requirement for passage through Start and commitment to cell division
SHS1	YDL225W	S000002384	0.41	1.748	0.917322	24	One of five related septins (Cdc3p, Cdc10p, Cdc11p, Cdc12p, Shs1p) that form a cortical filamentous collar at the mother-bud neck which is necessary for normal morphogenesis and cytokinesis
GCS1	YDL226C	S000002385	-0.14	3.129	0.76724	24	ADP-ribosylation factor GTPase activating protein (ARF GAP), involved in ER-Golgi transport; shares functional similarity with Glo3p
SSB1	YDL229W	S000002388	2.16	2.721	0.72358	34	Cytoplasmic ATPase that is a ribosome-associated molecular chaperone, functions with J-protein partner Zuo1p; may be involved in folding of newly-made polypeptide chains; member of the HSP70 family; interacts with phosphatase subunit Reg1p
PTP1	YDL230W	S000002389	0.57	2.031	1.19785	6	Phosphotyrosine-specific protein phosphatase that dephosphorylates a broad range of substrates in vivo, including Fpr3p; localized to the cytoplasm and the mitochondria
GYP7	YDL234C	S000002393	-0.33	2.095	2.75977	17	GTPase-activating protein for yeast Rab family members including: Ypt7p (most effective), Ypt1p, Ypt31p, and Ypt32p (in vitro); involved in vesicle mediated protein trafficking
YPD1	YDL235C	S000002394	-0.49	1.082	0.949457	6	Phosphorelay intermediate protein, phosphorylated by the plasma membrane sensor Sln1p in response to osmotic stress and then in turn phosphorylates the response regulators Ssk1p in the cytosol and Skn7p in the nucleus
PHO13	YDL236W	S000002395	-0.44	1.016	0.995194	16	Alkaline phosphatase specific for p-nitrophenyl phosphate, involved in dephosphorylation of histone II-A and casein
YDL237W	YDL237W	S000002396	-0.97	2.866	0.736496	12	Putative protein of unknown function; YDL237W is not an essential gene; null mutant displays decreased frequency of mitochondrial genome loss (petite formation) and severe growth defect in minimal glycerol media
GUD1	YDL238C	S000002397	0.65	2.855	1.803	5	Guanine deaminase, a catabolic enzyme of the guanine salvage pathway producing xanthine and ammonia from guanine; activity is low in exponentially-growing cultures but expression is increased in post-diauxic and stationary-phase cultures
ADY3	YDL239C	S000002398	0.8	1.229	0.0129424	4	Protein required for spore wall formation, thought to mediate assembly of a Don1p-containing structure at the leading edge of the prospore membrane via interaction with spindle pole body components; potentially phosphorylated by Cdc28p
LRG1	YDL240W	S000002399	0.66	4.072	1.15613	8	Putative GTPase-activating protein (GAP) involved in the Pkc1p-mediated signaling pathway that controls cell wall integrity; appears to specifically regulate 1,3-beta-glucan synthesis
THI13	YDL244W	S000002403	-0.05	2.296	12.2217	4	Protein involved in synthesis of the thiamine precursor hydroxymethylpyrimidine (HMP); member of a subtelomeric gene family including THI5, THI11, THI12, and THI13
NTH1	YDR001C	S000002408	0.69	3.056	2.39994	37	Neutral trehalase, degrades trehalose; required for thermotolerance and may mediate resistance to other cellular stresses; may be phosphorylated by Cdc28p
YRB1	YDR002W	S000002409	-0.91	2.225	0.746997	8	Ran GTPase binding protein; involved in nuclear protein import and RNA export, ubiquitin-mediated protein degradation during the cell cycle; shuttles between the nucleus and cytoplasm; is essential; homolog of human RanBP1
RCR2	YDR003W	S000002410	-0.36	3.689	0.671845	4	Vacuolar protein that presumably functions within the endosomal-vacuolar trafficking pathway, affecting events that determine whether plasma membrane proteins are degraded or routed to the plasma membrane; similar to Rcr1p
MAF1	YDR005C	S000002412	0.63	1.419	1.46044	7	Negative regulator of RNA polymerase III; component of several signaling pathways that repress polymerase III transcription in response to changes in cellular environment; targets the initiation factor TFIIIB
SOK1	YDR006C	S000002413	-1.91	3.166	1.44143	20	Protein whose overexpression suppresses the growth defect of mutants lacking protein kinase A activity; involved in cAMP-mediated signaling; localized to the nucleus; similar to the mouse testis-specific protein PBS13
TRP1	YDR007W	S000002414	0.28	1.793	0.850038	3	Phosphoribosylanthranilate isomerase that catalyzes the third step in tryptophan biosynthesis; in 2004, the sequence of TRP1 from strain S228C was updated by changing the previously annotated internal STOP (TAA) to serine (TCA)
SNQ2	YDR011W	S000002418	-0.09	1.715	0.944485	33	Plasma membrane ATP-binding cassette (ABC) transporter, multidrug transporter involved in multidrug resistance and resistance to singlet oxygen species
RPL4B	YDR012W	S000002419	0.83	2.937	0.618009	1	Protein component of the large (60S) ribosomal subunit, nearly identical to Rpl4Ap and has similarity to E. coli L4 and rat L4 ribosomal proteins
RAD61	YDR014W	S000002421	0.21	1.947	1.55795	4	Protein of unknown function; mutation confers radiation sensitivity
KCS1	YDR017C	S000002424	0.18	2.019	0.957338	16	Inositol hexakisphosphate (IP6) and inositol heptakisphosphate (IP7) kinase; generation of high energy inositol pyrophosphates by Kcs1p is required for many processes such as vacuolar biogenesis, stress response and telomere maintenance
GCV1	YDR019C	S000002426	-0.94	2.979	0.761228	14	T subunit of the mitochondrial glycine decarboxylase complex, required for the catabolism of glycine to 5,10-methylene-THF; expression is regulated by levels of levels of 5,10-methylene-THF in the cytoplasm
YDR020C	YDR020C	S000002427	-2.07	3.308	0.803294	3	Predicted protein shares weak similarity with uridine kinases and with phosphoribokinases; null mutant suppresses dst1delta sensitivity for 6-azauracil
FAL1	YDR021W	S000002428	0.74	2.526	0.763976	6	Nucleolar protein required for maturation of 18S rRNA, member of the eIF4A subfamily of DEAD-box ATP-dependent RNA helicases
CIS1	YDR022C	S000002429	0.27	1.9	0.807761	5	Autophagy-specific protein required for autophagosome formation; may form a complex with Atg17p and Atg29p that localizes other proteins to the pre-autophagosomal structure; high-copy suppressor of CIK1 deletion
SES1	YDR023W	S000002430	0.19	1.223	0.636673	26	Cytosolic seryl-tRNA synthetase, class II aminoacyl-tRNA synthetase that aminoacylates tRNA(Ser), displays tRNA-dependent amino acid recognition which enhances discrimination of the serine substrate, interacts with peroxin Pex21p
VPS54	YDR027C	S000002434	-0.08	3.977	1.25688	12	Component of the GARP (Golgi-associated retrograde protein) complex, Vps51p-Vps52p-Vps53p-Vps54p, which is required for the recycling of proteins from endosomes to the late Golgi; potentially phosphorylated by Cdc28p
REG1	YDR028C	S000002435	-2.79	3.458	0.96731	28	Regulatory subunit of type 1 protein phosphatase Glc7p, involved in negative regulation of glucose-repressible genes
MIC14	YDR031W	S000002438	-1.82	2.817	0.891141	6	Mitochondrial intermembrane space cysteine motif protein of 14 kDa
PST2	YDR032C	S000002439	1.03	4.177	1.17572	7	Protein with similarity to members of a family of flavodoxin-like proteins; induced by oxidative stress in a Yap1p dependent manner; the authentic, non-tagged protein is detected in highly purified mitochondria in high-throughput studies
MRH1	YDR033W	S000002440	0.12	1.229	0.495515	3	Protein that localizes primarily to the plasma membrane, also found at the nuclear envelope; the authentic, non-tagged protein is detected in mitochondria in a phosphorylated state; has similarity to Hsp30p and Yro2p
LYS14	YDR034C	S000002441	0.04	3.329	0.972419	4	Transcriptional activator involved in regulation of genes of the lysine biosynthesis pathway; requires 2-aminoadipate semialdehyde as co-inducer
ARO3	YDR035W	S000002442	-1.32	2.923	0.828917	15	3-deoxy-D-arabino-heptulosonate-7-phosphate (DAHP) synthase, catalyzes the first step in aromatic amino acid biosynthesis and is feedback-inhibited by phenylalanine or high concentration of tyrosine or tryptophan
EHD3	YDR036C	S000002443	-0.22	1.717	0.984184	13	3-hydroxyisobutyryl-CoA hydrolase, member of a family of enoyl-CoA hydratase/isomerases; non-tagged protein is detected in highly purified mitochondria in high-throughput studies; phosphorylated; mutation affects fluid-phase endocytosis
KRS1	YDR037W	S000002444	0.15	2.49	0.566835	35	Lysyl-tRNA synthetase; also identified as a negative regulator of general control of amino acid biosynthesis
ENA5	YDR038C	S000002445	3.06	3.491	0.599903	13	Protein with similarity to P-type ATPase sodium pumps, member of the Na+ efflux ATPase family
ENA1	YDR040C	S000002447	3.29	3.553	0.662228	1	P-type ATPase sodium pump, involved in Na+ and Li+ efflux to allow salt tolerance
RSM10	YDR041W	S000002448	0.5	2.039	0.919327	5	Mitochondrial ribosomal protein of the small subunit, has similarity to E. coli S10 ribosomal protein; essential for viability, unlike most other mitoribosomal proteins
NRG1	YDR043C	S000002450	0.14	4.391	2.6479	4	Transcriptional repressor that recruits the Cyc8p-Tup1p complex to promoters; mediates glucose repression and negatively regulates a variety of processes including filamentous growth and alkaline pH response
HEM13	YDR044W	S000002451	-0.56	3.394	0.844635	12	Coproporphyrinogen III oxidase, an oxygen requiring enzyme that catalyzes the sixth step in the heme biosynthetic pathway; localizes to the mitochondrial inner membrane; transcription is repressed by oxygen and heme (via Rox1p and Hap1p)
RPC11	YDR045C	S000002452	-0.05	3.986	0.63874	1	RNA polymerase III subunit C11; mediates pol III RNA cleavage activity and is important for termination of transcription; homologous to TFIIS
BAP3	YDR046C	S000002453	0.54	3.814	0.463985	4	Amino acid permease involved in the uptake of cysteine, leucine, isoleucine and valine
HEM12	YDR047W	S000002454	-2.1	3.251	1.06028	17	Uroporphyrinogen decarboxylase, catalyzes the fifth step in the heme biosynthetic pathway; localizes to both the cytoplasm and nucleus; activity inhibited by Cu2+, Zn2+, Fe2+, Fe3+ and sulfhydryl-specific reagents
YDR049W	YDR049W	S000002456	-3.74	4.212	0.77164	13	Zinc finger protein; putative transcription factor that may interact with proteins involved in histone acetylation or deacetylation; may be involved in altering acetylation on histone lysines
TPI1	YDR050C	S000002457	-0.48	1.833	0.985686	21	Triose phosphate isomerase, abundant glycolytic enzyme; mRNA half-life is regulated by iron availability; transcription is controlled by activators Reb1p, Gcr1p, and Rap1p through binding sites in the 5' non-coding region
YDR051C	YDR051C	S000002458	0.53	1.023	0.828486	12	Protein of unknown function; interacts with Hsp82p in two-hybrid assay; deletion confers sensitivity to Nickel
CDC34	YDR054C	S000002461	0.17	2.878	0.667297	7	Ubiquitin-conjugating enzyme (E2) and catalytic subunit of SCF ubiquitin-protein ligase complex (together with Skp1p, Rbx1p, Cdc53p, and an F-box protein) that regulates cell cycle progression by targeting key substrates for degradation
PST1	YDR055W	S000002462	-0.91	2.25	4.65361	14	Cell wall protein that contains a putative GPI-attachment site; secreted by regenerating protoplasts; up-regulated by activation of the cell integrity pathway, as mediated by Rlm1p; upregulated by cell wall damage via disruption of FKS1
YDR056C	YDR056C	S000002463	-0.21	1.645	0.73995	4	Putative protein of unknown function; green fluorescent protein (GFP)-fusion protein localizes to the endoplasmic retiuculum; YDR056C is not an essential protein
YOS9	YDR057W	S000002464	1.79	3.189	1.0178	11	ER quality-control lectin; integral subunit of the HRD ligase; serves as a receptor for misfolded N-glycosylated proteins, participates in their targeting to ERAD; member of the OS-9 protein family
TGL2	YDR058C	S000002465	1.14	4.286	2.01056	6	Protein with lipolytic activity towards triacylglycerols and diacylglycerols when expressed in E. coli; role in yeast lipid degradation is unclear
MAK21	YDR060W	S000002467	0.44	2.755	0.759699	24	Constituent of 66S pre-ribosomal particles, required for large (60S) ribosomal subunit biogenesis; involved in nuclear export of pre-ribosomes; required for maintenance of dsRNA virus; homolog of human CAATT-binding protein
YDR061W	YDR061W	S000002468	-0.22	2.546	1.55995	12	Protein with similarity to ATP-binding cassette (ABC) transporter family members; lacks predicted membrane-spanning regions; transcriptionally activated by Yrm1p along with genes involved in multidrug resistance
LCB2	YDR062W	S000002469	-0.77	2.266	1.18509	15	Component of serine palmitoyltransferase, responsible along with Lcb1p for the first committed step in sphingolipid synthesis, which is the condensation of serine with palmitoyl-CoA to form 3-ketosphinganine
YDR063W	YDR063W	S000002470	-1.08	2.537	1.14163	2	Putative protein of unknown function; green fluorescent protein (GFP)-fusion protein localizes to the cytoplasm and nucleus; null mutant is viable and displays decreased frequency of mitochondrial genome loss (petite formation)
RPS13	YDR064W	S000002471	-0.17	1.343	0.575086	14	Protein component of the small (40S) ribosomal subunit; has similarity to E. coli S15 and rat S13 ribosomal proteins
YDR067C	YDR067C	S000002474	0.82	2.031	1.40065	2	Cytoplasmic protein required for replication of Brome mosaic virus in S. cerevisiae, which is a model system for studying replication of positive-strand RNA viruses in their natural hosts
DOS2	YDR068W	S000002475	0.11	1.621	0.801014	13	Protein of unknown function, green fluorescent protein (GFP)-fusion protein localizes to the cytoplasm
DOA4	YDR069C	S000002476	-1.2	2.144	2.23148	14	Ubiquitin isopeptidase, required for recycling ubiquitin from proteasome-bound ubiquitinated intermediates, acts at the late endosome/prevacuolar compartment to recover ubiquitin from ubiquitinated membrane proteins en route to the vacuole
YDR070C	YDR070C	S000002477	-0.99	3.079	26.4803	2	Putative protein of unknown function; the authentic, non-tagged protein is detected in highly purified mitochondria in high-throughput studies
PAA1	YDR071C	S000002478	0.28	1.837	0.943831	11	Polyamine acetyltransferase; acetylates polyamines (e.g. putrescine, spermidine, spermine) and also aralkylamines (e.g. tryptamine, phenylethylamine); may be involved in transcription and/or DNA replication
SNF11	YDR073W	S000002480	-0.92	2.384	0.798797	2	Subunit of the SWI/SNF chromatin remodeling complex involved in transcriptional regulation; interacts with a highly conserved 40-residue sequence of Snf2p
TPS2	YDR074W	S000002481	0.9	2.336	2.52415	47	Phosphatase subunit of the trehalose-6-phosphate synthase/phosphatase complex, which synthesizes the storage carbohydrate trehalose; expression is induced by stress conditions and repressed by the Ras-cAMP pathway
PPH3	YDR075W	S000002482	1.1	2.939	0.505594	7	Catalytic subunit of an evolutionarily conserved protein phosphatase complex containing Psy2p and the regulatory subunit Psy4p; required for cisplatin resistance; involved in activation of Gln3p
VPS41	YDR080W	S000002487	0.85	1.8	1.49252	9	Vacuolar membrane protein that is a subunit of the homotypic vacuole fusion and vacuole protein sorting (HOPS) complex; essential for membrane docking and fusion at the Golgi-to-endosome and endosome-to-vacuole stages of protein transport
PDC2	YDR081C	S000002488	-0.18	2.623	1.07897	10	Transcription factor required for the synthesis of the glycolytic enzyme pyruvate decarboxylase, required for high level expression of both the THI and the PDC genes
RRP8	YDR083W	S000002490	0.32	2.186	0.653881	8	Nucleolar protein involved in rRNA processing, pre-rRNA cleavage at site A2; also involved in telomere maintenance; mutation is synthetically lethal with a gar1 mutation
TVP23	YDR084C	S000002491	0.05	2.05	1.36694	6	Integral membrane protein localized to late Golgi vesicles along with the v-SNARE Tlg2p; green fluorescent protein (GFP)-fusion protein localizes to the cytoplasm in a punctate pattern
SSS1	YDR086C	S000002493	-0.1	1.836	0.959347	2	Subunit of the Sec61p translocation complex (Sec61p-Sss1p-Sbh1p) that forms a channel for passage of secretory proteins through the endoplasmic reticulum membrane, and of the Ssh1p complex (Ssh1p-Sbh2p-Sss1p); interacts with Ost4p and Wbp1p
RRP1	YDR087C	S000002494	-0.01	1.846	0.700424	11	Essential evolutionarily conserved nucleolar protein necessary for biogenesis of 60S ribosomal subunits and processing of pre-rRNAs to mature rRNAs, associated with several distinct 66S pre-ribosomal particles
SLU7	YDR088C	S000002495	-0.5	2.058	0.926139	10	RNA splicing factor, required for ATP-independent portion of 2nd catalytic step of spliceosomal RNA splicing; interacts with Prp18p; contains zinc knuckle domain
YDR089W	YDR089W	S000002496	-0.16	1.653	1.00208	9	Protein of unknown function; deletion confers resistance to Nickel
RLI1	YDR091C	S000002498	-0.69	1.613	0.667204	31	Essential iron-sulfur protein required for ribosome biogenesis and translation initiation; facilitates binding of a multifactor complex (MFC) of translation initiation factors to the small ribosomal subunit; predicted ABC family ATPase
UBC13	YDR092W	S000002499	1.89	3.252	0.97284	4	Ubiquitin-conjugating enzyme involved in the error-free DNA postreplication repair pathway; interacts with Mms2p to assemble ubiquitin chains at the Ub Lys-63 residue; DNA damage triggers redistribution from the cytoplasm to the nucleus
DNF2	YDR093W	S000002500	-0.29	2.664	0.896018	25	Aminophospholipid translocase (flippase) that localizes primarily to the plasma membrane; contributes to endocytosis, protein transport and cell polarity; type 4 P-type ATPase
GIS1	YDR096W	S000002503	2.3	3.321	1.22697	9	JmjC domain-containing histone demethylase; transcription factor involved in the expression of genes during nutrient limitation; also involved in the negative regulation of DPP1 and PHR1
MSH6	YDR097C	S000002504	0.91	2.606	1.09661	22	Protein required for mismatch repair in mitosis and meiosis, forms a complex with Msh2p to repair both single-base & insertion-deletion mispairs; potentially phosphorylated by Cdc28p
GRX3	YDR098C	S000002505	-0.59	1.983	1.11626	6	Hydroperoxide and superoxide-radical responsive glutathione-dependent oxidoreductase; monothiol glutaredoxin subfamily member along with Grx4p and Grx5p; protects cells from oxidative damage
BMH2	YDR099W	S000002506	-1.02	1.453	1.13455	18	14-3-3 protein, minor isoform; controls proteome at post-transcriptional level, binds proteins and DNA, involved in regulation of many processes including exocytosis, vesicle transport, Ras/MAPK signaling, and rapamycin-sensitive signaling
TVP15	YDR100W	S000002507	-0.56	2.927	0.843348	1	Integral membrane protein localized to late Golgi vesicles along with the v-SNARE Tlg2p
ARX1	YDR101C	S000002508	-0.21	2.001	0.462508	24	Shuttling pre-60S factor; involved in the biogenesis of ribosomal large subunit biogenesis; interacts directly with Alb1; responsible for Tif6 recycling defects in absence of Rei1; associated with the ribosomal export complex
STE5	YDR103W	S000002510	0.42	4.828	0.317241	2	Pheromone-response scaffold protein; binds kinases Ste11p, Ste7p, and Fus3p to form a MAPK cascade complex that interacts with the plasma membrane, via a PH (pleckstrin homology) and PM/NLS domain, and with Ste4p-Ste18p, during signaling
TMN2	YDR107C	S000002514	0.16	2.872	1.11806	9	Protein with a role in cellular adhesion and filamentous growth; similar to Emp70p and Tmn3p; member of the evolutionarily conserved Transmembrane Nine family of proteins with nine membrane-spanning segments
GSG1	YDR108W	S000002515	4.28	3.723	0.877578	10	Subunit of TRAPP (transport protein particle), a multi-subunit complex involved in targeting and/or fusion of ER-to-Golgi transport vesicles with their acceptor compartment; protein has late meiotic role, following DNA replication
YDR109C	YDR109C	S000002516	1.94	3.371	0.910007	12	Putative kinase
FOB1	YDR110W	S000002517	0.72	2.059	0.680869	4	Nucleolar protein required for DNA replication fork blocking and recombinational hotspot activities; binds to the replication fork barrier site in the rDNA region; related to retroviral integrases
ALT2	YDR111C	S000002518	0.36	3.82	0.612932	7	Putative alanine transaminase (glutamic pyruvic transaminase)
PDS1	YDR113C	S000002520	-3.37	2.412	0.772844	4	Securin that inhibits anaphase by binding separin Esp1p, also blocks cyclin destruction and mitotic exit, essential for cell cycle arrest in mitosis in the presence of DNA damage or aberrant mitotic spindles; also present in meiotic nuclei
MRPL1	YDR116C	S000002523	1.85	2.215	1.05015	9	Mitochondrial ribosomal protein of the large subunit
TMA64	YDR117C	S000002524	1.88	2.75	2.13969	15	Protein of unknown function that associates with ribosomes; has a putative RNA binding domain
APC4	YDR118W	S000002525	-0.11	1.15	1.41162	4	Subunit of the Anaphase-Promoting Complex/Cyclosome (APC/C), which is a ubiquitin-protein ligase required for degradation of anaphase inhibitors, including mitotic cyclins, during the metaphase/anaphase transition
VBA4	YDR119W	S000002526	-0.41	3.478	0.680303	4	Protein of unknown function with proposed role as a basic amino acid permease based on phylogeny; GFP-fusion protein localizes to vacuolar membrane; physical interaction with Atg27p suggests a possible role in autophagy; non-essential gene
TRM1	YDR120C	S000002527	0.54	2.424	0.535219	24	tRNA methyltransferase, localizes to both the nucleus and mitochondrion to produce the modified base N2,N2-dimethylguanosine in tRNAs in both compartments
DPB4	YDR121W	S000002528	-0.59	4.058	0.888134	10	Shared subunit of DNA polymerase (II) epsilon and of ISW2/yCHRAC chromatin accessibility complex; involved in both chromosomal DNA replication and in inheritance of telomeric silencing
KIN1	YDR122W	S000002529	-0.17	1.154	1.76443	20	Serine/threonine protein kinase involved in regulation of exocytosis; localizes to the cytoplasmic face of the plasma membrane; closely related to Kin2p
INO2	YDR123C	S000002530	-0.03	1.232	0.636442	3	Component of the heteromeric Ino2p/Ino4p basic helix-loop-helix transcription activator that binds inositol/choline-responsive elements (ICREs), required for derepression of phospholipid biosynthetic genes in response to inositol depletion
ARO1	YDR127W	S000002534	2.1	1.382	0.85107	76	Pentafunctional arom protein, catalyzes steps 2 through 6 in the biosynthesis of chorismate, which is a precursor to aromatic amino acids
YDR128W	YDR128W	S000002535	1.47	2.47	2.08125	6	Putative protein of unknown function; YDR128W is synthetically sick with cdc13-1
SAC6	YDR129C	S000002536	-1.25	1.756	1.28601	30	Fimbrin, actin-bundling protein; cooperates with Scp1p (calponin/transgelin) in the organization and maintenance of the actin cytoskeleton
FIN1	YDR130C	S000002537	-2.26	2.852	1.17723	3	Spindle pole body-related intermediate filament protein, forms cell cycle-specific filaments between spindle pole bodies in mother and daughter cells, able to self-assemble, expression induced during S/G2, localization cell-cycle dependent
YDR131C	YDR131C	S000002538	-1.72	3.18	1.68086	6	F-box protein, substrate-specific adaptor subunit that recruits substrates to a core ubiquitination complex
YCF1	YDR135C	S000002542	0.01	3.642	1.16143	37	Vacuolar glutathione S-conjugate transporter of the ATP-binding cassette family, has a role in detoxifying metals such as cadmium, mercury, and arsenite; also transports unconjugated bilirubin; similar to human cystic fibrosis protein CFTR
RGP1	YDR137W	S000002544	1.06	2.202	1.18378	9	Subunit of a Golgi membrane exchange factor (Ric1p-Rgp1p) that catalyzes nucleotide exchange on Ypt6p
HPR1	YDR138W	S000002545	-0.17	1.95	1.04511	12	Subunit of THO/TREX complexes that couple transcription elongation with mitotic recombination and with mRNA metabolism and export, subunit of an RNA Pol II complex; regulates lifespan; involved in telomere maintenance; similar to Top1p
RUB1	YDR139C	S000002546	-0.03	1.762	0.70647	2	Ubiquitin-like protein with similarity to mammalian NEDD8; conjugation (neddylation) substrates include the cullins Cdc53p, Rtt101p, and Cul3p; activated by Ula1p and Uba3p (E1 enzyme pair); conjugation mediated by Ubc12p (E2 enzyme)
MTQ2	YDR140W	S000002547	0.28	3.39	0.681129	3	S-adenosylmethionine-dependent methyltransferase of the seven beta-strand family; methylates release factor eRF1 (Sup45p) in vitro; is not an essential gene; similar to E.coli PrmC
DOP1	YDR141C	S000002548	-0.61	2.07	1.72752	45	Protein of unknown function, essential for viability, involved in establishing cellular polarity and morphogenesis; the authentic, non-tagged protein is detected in highly purified mitochondria in high-throughput studies
PEX7	YDR142C	S000002549	0.75	2.762	1.57047	7	Peroxisomal signal receptor for the N-terminal nonapeptide signal (PTS2) of peroxisomal matrix proteins; WD repeat protein; defects in human homolog cause lethal rhizomelic chondrodysplasia punctata (RCDP)
SAN1	YDR143C	S000002550	1.11	2.664	0.587231	10	Ubiquitin-protein ligase, involved in the proteasome-dependent degradation of aberrant nuclear proteins
MKC7	YDR144C	S000002551	-0.19	1.937	0.483069	5	GPI-anchored aspartyl protease (yapsin) involved in protein processing; shares functions with Yap3p and Kex2p
TAF12	YDR145W	S000002552	-0.15	3.106	0.95056	24	Subunit (61/68 kDa) of TFIID and SAGA complexes, involved in RNA polymerase II transcription initiation and in chromatin modification, similar to histone H2A
SWI5	YDR146C	S000002553	-0.58	3.477	0.231671	4	Transcription factor that activates transcription of genes expressed at the M/G1 phase boundary and in G1 phase; localization to the nucleus occurs during G1 and appears to be regulated by phosphorylation by Cdc28p kinase
EKI1	YDR147W	S000002554	-2.51	2.593	0.583903	8	Ethanolamine kinase, primarily responsible for phosphatidylethanolamine synthesis via the CDP-ethanolamine pathway; exhibits some choline kinase activity, thus contributing to phosphatidylcholine synthesis via the CDP-choline pathway
KGD2	YDR148C	S000002555	0.63	1.409	1.38569	8	Dihydrolipoyl transsuccinylase, component of the mitochondrial alpha-ketoglutarate dehydrogenase complex, which catalyzes the oxidative decarboxylation of alpha-ketoglutarate to succinyl-CoA in the TCA cycle; phosphorylated
NUM1	YDR150W	S000002557	0.11	2.957	1.15565	47	Protein required for nuclear migration, localizes to the mother cell cortex and the bud tip; may mediate interactions of dynein and cytoplasmic microtubules with the cell cortex
GIR2	YDR152W	S000002559	-0.03	1.868	0.707401	7	Highly-acidic cytoplasmic RWD domain-containing protein of unknown function, sensitive to proteolysis, N-terminal region has high content of acidic amino acid residues, putative IUP (intrinsically unstructured protein)
ENT5	YDR153C	S000002560	-0.62	2.941	0.992611	11	Protein containing an N-terminal epsin-like domain involved in clathrin recruitment and traffic between the Golgi and endosomes; associates with the clathrin adaptor Gga2p, clathrin adaptor complex AP-1, and clathrin
CPR1	YDR155C	S000002562	-0.96	3.771	1.17011	14	Cytoplasmic peptidyl-prolyl cis-trans isomerase (cyclophilin), catalyzes the cis-trans isomerization of peptide bonds N-terminal to proline residues; binds the drug cyclosporin A
RPA14	YDR156W	S000002563	-0.63	2.929	0.401675	4	RNA polymerase I subunit A14
HOM2	YDR158W	S000002565	0.55	1.921	0.70696	23	Aspartic beta semi-aldehyde dehydrogenase, catalyzes the second step in the common pathway for methionine and threonine biosynthesis; expression regulated by Gcn4p and the general control of amino acid synthesis
SAC3	YDR159W	S000002566	0.47	4.591	0.870701	12	Nuclear pore-associated protein, forms a complex with Thp1p that is involved in transcription and in mRNA export from the nucleus
YDR161W	YDR161W	S000002568	2.04	3.566	0.632396	11	Putative protein of unknown function; non-essential gene; proposed function in rRNA and ribosome biosynthesis based on transcriptional co-regulation
NBP2	YDR162C	S000002569	1.27	3.364	0.980167	4	Protein involved in the HOG (high osmolarity glycerol) pathway, negatively regulates Hog1p by recruitment of phosphatase Ptc1p the Pbs2p-Hog1p complex, found in the nucleus and cytoplasm, contains an SH3 domain that binds Pbs2p
CWC15	YDR163W	S000002570	0.38	1.598	0.601631	6	Non-essential protein involved in pre-mRNA splicing, component of a complex containing Cef1p; has similarity to S. pombe Cwf15p
SEC1	YDR164C	S000002571	-0.52	1.98	0.910938	14	Sm-like protein involved in docking and fusion of exocytic vesicles through binding to assembled SNARE complexes at the membrane; localization to sites of secretion (bud neck and bud tip) is dependent on SNARE function
TRM82	YDR165W	S000002572	0.38	1.873	0.539165	14	Subunit of a tRNA methyltransferase complex composed of Trm8p and Trm82p that catalyzes 7-methylguanosine modification of tRNA
SEC5	YDR166C	S000002573	-0.33	2.008	1.36722	20	Essential 107kDa subunit of the exocyst complex (Sec3p, Sec5p, Sec6p, Sec8p, Sec10p, Sec15p, Exo70p, and Exo84p), which has the essential function of mediating polarized targeting of secretory vesicles to active sites of exocytosis
TAF10	YDR167W	S000002574	0.17	2.13	0.769877	6	Subunit (145 kDa) of TFIID and SAGA complexes, involved in RNA polymerase II transcription initiation and in chromatin modification
CDC37	YDR168W	S000002575	3.44	3.792	1.25666	24	Essential Hsp90p co-chaperone; necessary for passage through the START phase of the cell cycle; stabilizes protein kinase nascent chains and participates along with Hsp90p in their folding
STB3	YDR169C	S000002576	-1.65	2.397	1.46145	13	Protein that binds Sin3p in a two-hybrid assay
SEC7	YDR170C	S000002577	-0.04	2.219	1.35689	58	Guanine nucleotide exchange factor (GEF) for ADP ribosylation factors involved in proliferation of the Golgi, intra-Golgi transport and ER-to-Golgi transport; found in the cytoplasm and on Golgi-associated coated vesicles
HSP42	YDR171W	S000002578	1.14	2.474	4.91741	13	Small heat shock protein (sHSP) with chaperone activity; forms barrel-shaped oligomers that suppress unfolded protein aggregation; involved in cytoskeleton reorganization after heat shock
SUP35	YDR172W	S000002579	0.16	2.265	1.00305	27	Translation termination factor eRF3; altered protein conformation creates the [PSI(+)] prion, a dominant cytoplasmically inherited protein aggregate that alters translational fidelity and creates a nonsense suppressor phenotype
HMO1	YDR174W	S000002581	0.29	1.526	0.864777	8	Chromatin associated high mobility group (HMG) family member involved in genome maintenance; rDNA-binding component of the Pol I transcription system; associates with a 5'-3' DNA helicase and Fpr1p, a prolyl isomerase
RSM24	YDR175C	S000002582	0.56	2.542	0.86331	10	Mitochondrial ribosomal protein of the small subunit
NGG1	YDR176W	S000002583	-0.47	3.403	0.732982	8	Transcriptional regulator involved in glucose repression of Gal4p-regulated genes; component of transcriptional adaptor and histone acetyltransferase complexes, the ADA complex, the SAGA complex, and the SLIK complex
UBC1	YDR177W	S000002584	-0.26	1.792	0.818469	9	Ubiquitin-conjugating enzyme that mediates selective degradation of short-lived and abnormal proteins; plays a role in vesicle biogenesis and ER-associated protein degradation (ERAD); component of the cellular stress response
SDH4	YDR178W	S000002585	0.08	1.916	1.9685	5	Membrane anchor subunit of succinate dehydrogenase (Sdh1p, Sdh2p, Sdh3p, Sdh4p), which couples the oxidation of succinate to the transfer of electrons to ubiquinone
YDR179W-A	YDR179W-A	S000002587	0.58	2.989	1.04456	1	Putative protein of unknown function
SCC2	YDR180W	S000002588	0.58	3.287	1.09627	15	Subunit of cohesin loading factor (Scc2p-Scc4p), a complex required for loading of cohesin complexes onto chromosomes; involved in establishing sister chromatid cohesion during DSB repair via histone H2AX; evolutionarily-conserved adherin
CDC1	YDR182W	S000002590	-0.74	2.085	1.06039	7	Putative membrane protein of unknown function involved in Mn2+ homeostasis; mutants display actin and general growth defects, heterogeneous cell cycle arrests, and pleiotropic defects in cell cycle progression and organelle distribution
PLP1	YDR183W	S000002591	2.64	1.986	1.24113	6	Protein with a possible role in folding of beta-tubulin; has weak similarity to phosducins, which are G-protein regulators
ATC1	YDR184C	S000002592	1.19	3.713	0.020023	5	Nuclear protein, possibly involved in regulation of cation stress responses and/or in the establishment of bipolar budding pattern
YDR186C	YDR186C	S000002594	0.81	4.262	1.66937	9	Putative protein of unknown function; may interact with ribosomes, based on co-purification experiments; green fluorescent protein (GFP)-fusion protein localizes to the cytoplasm
CCT6	YDR188W	S000002596	1.72	3.533	0.77795	23	Subunit of the cytosolic chaperonin Cct ring complex, related to Tcp1p, essential protein that is required for the assembly of actin and tubulins in vivo; contains an ATP-binding motif
SLY1	YDR189W	S000002597	-0.19	4.267	1.73454	16	Hydrophilic protein involved in vesicle trafficking between the ER and Golgi; SM (Sec1/Munc-18) family protein that binds the tSNARE Sed5p and stimulates its assembly into a trans-SNARE membrane-protein complex
RVB1	YDR190C	S000002598	0.48	3.011	1.01052	19	Essential protein involved in transcription regulation; component of chromatin remodeling complexes; required for assembly and function of the INO80 complex; member of the RUVB-like protein family
NUP42	YDR192C	S000002600	0.45	1.87	0.615434	2	Subunit of the nuclear pore complex (NPC) that localizes exclusively to the cytoplasmic side; involved in RNA export, most likely at a terminal step; interacts with Gle1p
MSS116	YDR194C	S000002602	-0.23	1.708	1.25749	22	DEAD-box protein required for efficient splicing of mitochondrial Group I and II introns; non-polar RNA helicase that also facilities strand annealing
REF2	YDR195W	S000002603	-0.4	1.282	0.840489	9	RNA-binding protein involved in the cleavage step of mRNA 3'-end formation prior to polyadenylation, and in snoRNA maturation; part of holo-CPF subcomplex APT, which associates with 3'-ends of snoRNA- and mRNA-encoding genes
YDR196C	YDR196C	S000002604	1.52	4.054	1.33621	6	Putative dephospho-CoA kinase (DPCK) that catalyzes the final step in Coenzyme A biosynthesis; essential for viability; the authentic, non-tagged protein is detected in highly purified mitochondria in high-throughput studies
CBS2	YDR197W	S000002605	0.15	2.096	1.8769	2	Mitochondrial translational activator of the COB mRNA; interacts with translating ribosomes, acts on the COB mRNA 5'-untranslated leader
RKM2	YDR198C	S000002606	0.24	1.977	0.658292	6	Ribosomal protein lysine methyltransferase, responsible for epsilon-trimethylation of the lysine residue at position 10 of Rpl12Ap and Rpl12Bp
VPS64	YDR200C	S000002608	-0.98	3.38	1.16046	7	Cytoplasmic protein required for cytoplasm to vacuole targeting of proteins; forms a complex with Far3p, Far7p, Far10p, and Far11p that is involved in pheromone-induced cell cycle arrest; also localized to the endoplasmic reticulum membrane
RAV2	YDR202C	S000002610	-1.72	2.99	1.36259	4	Subunit of RAVE (Rav1p, Rav2p, Skp1p), a complex that associates with the V1 domain of the vacuolar membrane (H+)-ATPase (V-ATPase) and promotes assembly and reassembly of the holoenzyme
COQ4	YDR204W	S000002612	-1.43	2.136	2.0282	6	Protein with a role in ubiquinone (Coenzyme Q) biosynthesis, possibly functioning in stabilization of Coq7p; located on the matrix face of the mitochondrial inner membrane; component of a mitochondrial ubiquinone-synthesizing complex
MSC2	YDR205W	S000002613	0.86	4.276	1.61519	4	Member of the cation diffusion facilitator family, localizes to the endoplasmic reticulum and nucleus; mutations affect the cellular distribution of zinc and also confer defects in meiotic recombination between homologous chromatids
EBS1	YDR206W	S000002614	-1.05	2.457	1.43709	10	Protein involved in inhibition of translation and nonsense-mediated decay; interacts with cap binding protein Cdc33p and with Nam7p; localizes to P-bodies upon glucose starvation; mRNA abundance regulated by mRNA decay factors
UME6	YDR207C	S000002615	-0.95	3.796	0.626745	10	Key transcriptional regulator of early meiotic genes, binds URS1 upstream regulatory sequence, couples metabolic responses to nutritional cues with initiation and progression of meiosis, forms complex with Ime1p, and also with Sin3p-Rpd3p
MSS4	YDR208W	S000002616	-0.25	2.111	1.02804	7	Phosphatidylinositol-4-phosphate 5-kinase, involved in actin cytoskeleton organization and cell morphogenesis; multicopy suppressor of stt4 mutation
YDR209C	YDR209C	S000002617	-0.11	1.526	1.86013	1	Dubious open reading frame unlikely to encode a protein, based on available experimental and comparative sequence data; partially overlaps uncharacterized gene YDR210W.
GCD6	YDR211W	S000002619	-0.19	1.741	0.855417	19	Catalytic epsilon subunit of the translation initiation factor eIF2B, the guanine-nucleotide exchange factor for eIF2; activity subsequently regulated by phosphorylated eIF2; first identified as a negative regulator of GCN4 expression
TCP1	YDR212W	S000002620	0.88	3.036	0.773461	27	Alpha subunit of chaperonin-containing T-complex, which mediates protein folding in the cytosol; involved in maintenance of actin cytoskeleton; homolog to Drosophila melanogaster and mouse tailless complex polypeptide
UPC2	YDR213W	S000002621	-1.45	1.628	0.746648	5	Sterol regulatory element binding protein, induces transcription of sterol transport and biosynthetic genes; involved in the anaerobic induction of DAN/TIR mannoproteins and seripauperins; binucleate zinc cluster protein; Ecm22p homolog
AHA1	YDR214W	S000002622	-0.65	1.534	1.75717	18	Co-chaperone that binds to Hsp82p and activates its ATPase activity; similar to Hch1p; expression is regulated by stresses such as heat shock
ADR1	YDR216W	S000002624	-0.07	3.509	2.52862	28	Carbon source-responsive zinc-finger transcription factor, required for transcription of the glucose-repressed gene ADH2, of peroxisomal protein genes, and of genes required for ethanol, glycerol, and fatty acid utilization
RAD9	YDR217C	S000002625	0.17	3.796	0.443298	6	DNA damage-dependent checkpoint protein, required for cell-cycle arrest in G1/S, intra-S, and G2/M; transmits checkpoint signal by activating Rad53p and Chk1p; hyperphosphorylated by Mec1p and Tel1p; potential Cdc28p substrate
MFB1	YDR219C	S000002627	0.35	2.871	0.844108	3	Mitochondria-associated F-box protein involved in maintenance of normal mitochondrial morphology; interacts with Skp1p through the F-box motif; preferentially localizes to the mother cell during budding
GTB1	YDR221W	S000002629	-0.45	2.365	0.852517	13	Glucosidase II beta subunit, forms a complex with alpha subunit Rot2p, involved in removal of two glucose residues from N-linked glycans during glycoprotein biogenesis in the ER
YDR222W	YDR222W	S000002630	0.07	3.25	0.421747	8	Protein of unknown function; green fluorescent protein (GFP)-fusion protein localizes to the cytoplasm in a punctate pattern
ADK1	YDR226W	S000002634	-0.82	1.545	0.84914	20	Adenylate kinase, required for purine metabolism; localized to the cytoplasm and the mitochondria; lacks cleavable signal sequence
SIR4	YDR227W	S000002635	-0.49	4.581	0.931708	10	Silent information regulator that, together with SIR2 and SIR3, is involved in assembly of silent chromatin domains at telomeres and the silent mating-type loci; potentially phosphorylated by Cdc28p; some alleles of SIR4 prolong lifespan
PCF11	YDR228C	S000002636	1.28	3.411	1.06721	16	mRNA 3' end processing factor, essential component of cleavage and polyadenylation factor IA (CF IA), involved in pre-mRNA 3' end processing and in transcription termination; binds C-terminal domain of largest subunit of RNA pol II (Rpo21p)
IVY1	YDR229W	S000002637	-0.33	2.186	0.842209	8	Phospholipid-binding protein that interacts with both Ypt7p and Vps33p, may partially counteract the action of Vps33p and vice versa, localizes to the rim of the vacuole as cells approach stationary phase
COX20	YDR231C	S000002639	2.18	2.349	1.15982	7	Mitochondrial inner membrane protein, required for proteolytic processing of Cox2p and its assembly into cytochrome c oxidase
HEM1	YDR232W	S000002640	0.31	2.017	0.677503	17	5-aminolevulinate synthase, catalyzes the first step in the heme biosynthetic pathway; an N-terminal signal sequence is required for localization to the mitochondrial matrix; expression is regulated by Hap2p-Hap3p
RTN1	YDR233C	S000002641	-0.66	2.084	1.2131	15	ER membrane protein that interacts with exocyst subunit Sec6p and with Yip3p; also interacts with Sbh1p; null mutant has an altered (mostly cisternal) ER morphology; member of the RTNLA (reticulon-like A) subfamily
LYS4	YDR234W	S000002642	0.81	1.841	0.570856	12	Homoaconitase, catalyzes the conversion of homocitrate to homoisocitrate, which is a step in the lysine biosynthesis pathway
PRP42	YDR235W	S000002643	1.05	1.915	1.27341	9	U1 snRNP protein involved in splicing, required for U1 snRNP biogenesis; contains multiple tetriatricopeptide repeats
FMN1	YDR236C	S000002644	-1.31	3.253	1.57664	4	Riboflavin kinase, phosphorylates riboflavin to form riboflavin monophosphate (FMN), which is a necessary cofactor for many enzymes; localizes to microsomes and to the mitochondrial inner membrane
MRPL7	YDR237W	S000002645	0.2	4.06	1.0949	4	Mitochondrial ribosomal protein of the large subunit
SEC26	YDR238C	S000002646	1.28	3.754	1.74376	35	Essential beta-coat protein of the COPI coatomer, involved in ER-to-Golgi protein trafficking and maintenance of normal ER morphology; shares 43% sequence identity with mammalian beta-coat protein (beta-COP)
YDR239C	YDR239C	S000002647	1.68	2.576	0.883131	12	Protein of unknown function that may interact with ribosomes, based on co-purification experiments
SNU56	YDR240C	S000002648	-0.69	4.129	0.801375	4	Component of U1 snRNP required for mRNA splicing via spliceosome; yeast specific, no metazoan counterpart; interacts with mRNA in commitment complex
PRP28	YDR243C	S000002651	-2.9	3.675	1.2364	4	RNA helicase in the DEAD-box family, involved in RNA isomerization at the 5' splice site
PEX5	YDR244W	S000002652	0.46	3.522	0.835942	6	Peroxisomal membrane signal receptor for the C-terminal tripeptide signal sequence (PTS1) of peroxisomal matrix proteins, required for peroxisomal matrix protein import; also proposed to have PTS1-receptor independent functions
MNN10	YDR245W	S000002653	-0.46	1.9	0.835175	10	Subunit of a Golgi mannosyltransferase complex also containing Anp1p, Mnn9p, Mnn11p, and Hoc1p that mediates elongation of the polysaccharide mannan backbone; membrane protein of the mannosyltransferase family
TRS23	YDR246W	S000002654	-0.29	2.476	0.885583	9	One of 10 subunits of the transport protein particle (TRAPP) complex of the cis-Golgi which mediates vesicle docking and fusion; involved in endoplasmic reticulum (ER) to Golgi membrane traffic; human homolog is TRAPPC4
YDR248C	YDR248C	S000002656	-0.12	2.674	1.71267	4	Putative protein of unknown function; green fluorescent protein (GFP)-fusion protein localizes to the cytoplasm
PAM1	YDR251W	S000002659	-0.3	4.488	1.04275	29	Essential protein of unknown function; exhibits variable expression during colony morphogenesis; overexpression permits survival without protein phosphatase 2A, inhibits growth, and induces a filamentous phenotype
BTT1	YDR252W	S000002660	0.01	3.369	0.371865	2	Beta3 subunit of the heterotrimeric nascent polypeptide-associated complex which binds ribosomes via its beta-subunits in close proximity to nascent polypeptides; interacts with Caf130p of the CCR4-NOT complex; similar to human BTF3
RMD5	YDR255C	S000002663	2.59	2.426	3.65609	4	Cytosolic protein required for sporulation; also required for the ubiquitination of the gluconeogenetic enzyme fructose-1,6-bisphosphatase, which is degraded rapidly after the switch from gluconeogenesis to glycolysis
SET7	YDR257C	S000002665	-0.77	1.751	1.04841	9	Nuclear protein that contains a SET-domain, which have been shown to mediate methyltransferase activity in other proteins
HSP78	YDR258C	S000002666	3.18	4.649	4.02196	38	Oligomeric mitochondrial matrix chaperone that cooperates with Ssc1p in mitochondrial thermotolerance after heat shock; prevents the aggregation of misfolded matrix proteins; component of the mitochondrial proteolysis system
EXG2	YDR261C	S000002669	-2.3	4.191	0.678655	14	Exo-1,3-beta-glucanase, involved in cell wall beta-glucan assembly; may be anchored to the plasma membrane via a glycosylphosphatidylinositol (GPI) anchor
YDR261C-D	YDR261C-D	S000007395	-1.58	2.533	0.50712	2	Retrotransposon TYA Gag and TYB Pol genes; in YDRCTY1-3 TYB is mutant and probably non-functional
YDR262W	YDR262W	S000002670	-0.36	2.328	2.68757	7	Putative protein of unknown function; green fluorescent protein (GFP)-fusion protein localizes to the vacuole and is induced in response to the DNA-damaging agent MMS; gene expression increases in response to Zymoliase treatment
AKR1	YDR264C	S000002672	-0.04	1.534	0.914544	10	Palmitoyl transferase involved in protein palmitoylation; acts as a negative regulator of pheromone response pathway; required for endocytosis of pheromone receptors; involved in cell shape control; contains ankyrin repeats
PEX10	YDR265W	S000002673	-0.71	1.812	5.52127	2	C3HC4-type RING-finger peroxisomal membrane peroxin required for peroxisomal matrix protein import, interacts with Pex12p, links ubiquitin-conjugating Pex4p to import machinery; mutations in human homolog cause various peroxisomal disorders
YDR266C	YDR266C	S000002674	-0.07	2.018	0.708996	14	Protein of unknown function that may interact with ribosomes, based on co-purification experiments;green fluorescent protein (GFP)-fusion protein localizes to the cytoplasm; contains a RING finger domain
CIA1	YDR267C	S000002675	-0.56	1.577	0.586621	5	Essential protein involved in assembly of cytosolic and nuclear iron-sulfur proteins
MSW1	YDR268W	S000002676	1.56	4.351	1.06955	5	Mitochondrial tryptophanyl-tRNA synthetase
CCC2	YDR270W	S000002678	1.24	3.146	0.782222	4	Cu(+2)-transporting P-type ATPase, required for export of copper from the cytosol into an extracytosolic compartment; has similarity to human proteins involved in Menkes and Wilsons diseases
GLO2	YDR272W	S000002680	-0.14	5.097	1.12016	13	Cytoplasmic glyoxalase II, catalyzes the hydrolysis of S-D-lactoylglutathione into glutathione and D-lactate
RNH202	YDR279W	S000002687	3.15	5.093	0.403405	7	Ribonuclease H2 subunit, required for RNase H2 activity
RRP45	YDR280W	S000002688	1.74	2.035	0.712716	7	Protein involved in rRNA processing; component of the exosome 3->5 exonuclease complex
GCN2	YDR283C	S000002691	-1.36	2.284	1.61844	21	Protein kinase, phosphorylates the alpha-subunit of translation initiation factor eIF2 (Sui2p) in response to starvation; activated by uncharged tRNAs and the Gcn1p-Gcn20p complex
DPP1	YDR284C	S000002692	-0.14	3.642	1.22536	3	Diacylglycerol pyrophosphate (DGPP) phosphatase, zinc-regulated vacuolar membrane-associated lipid phosphatase, dephosphorylates DGPP to phosphatidate (PA) and Pi, then PA to diacylglycerol; involved in lipid signaling and cell metabolism
INM2	YDR287W	S000002695	0.66	3.278	0.994194	3	Inositol monophosphatase, involved in biosynthesis of inositol; enzymatic activity requires magnesium ions and is inhibited by lithium and sodium ions; inm1 inm2 double mutant lacks inositol auxotrophy
NSE3	YDR288W	S000002696	-0.52	2.317	0.912755	2	Essential subunit of the Mms21-Smc5-Smc6 complex; protein of unknown function; required for DNA repair and growth
RTT103	YDR289C	S000002697	-0.33	1.442	1.02644	11	Protein that interacts with exonuclease Rat1p and Rai1p and plays a role in transcription termination by RNA polymerase II, has an RPR domain (carboxy-terminal domain interacting domain); also involved in regulation of Ty1 transposition
YDR291W	YDR291W	S000002699	0.56	2.071	1.82342	8	Putative DNA helicase
SRP101	YDR292C	S000002700	0.08	2.556	1.20773	21	Signal recognition particle (SRP) receptor - alpha subunit; contain GTPase domains; involved in SRP-dependent protein targeting; interacts with SRP102p
SSD1	YDR293C	S000002701	-0.07	1.529	2.0711	49	Protein with a role in maintenance of cellular integrity, interacts with components of the TOR pathway; ssd1 mutant of a clinical S. cerevisiae strain displays elevated virulence
DPL1	YDR294C	S000002702	-0.79	2.186	1.3027	16	Dihydrosphingosine phosphate lyase, regulates intracellular levels of sphingolipid long-chain base phosphates (LCBPs), degrades phosphorylated long chain bases, prefers C16 dihydrosphingosine-l-phosphate as a substrate
HDA2	YDR295C	S000002703	0.04	1.965	0.955217	13	Subunit of a possibly tetrameric trichostatin A-sensitive class II histone deacetylase complex containing an Hda1p homodimer and an Hda2p-Hda3p heterodimer; involved in telomere maintenance
MHR1	YDR296W	S000002704	-0.93	1.757	0.964966	4	Protein involved in homologous recombination in mitochondria and in transcription regulation in nucleus; binds to activation domains of acidic activators; required for recombination-dependent mtDNA partitioning
SUR2	YDR297W	S000002705	-0.73	1.296	0.58976	10	Sphinganine C4-hydroxylase, catalyses the conversion of sphinganine to phytosphingosine in sphingolipid biosyntheis
ATP5	YDR298C	S000002706	0.37	2.603	1.21495	13	Subunit 5 of the stator stalk of mitochondrial F1F0 ATP synthase, which is an evolutionarily conserved enzyme complex required for ATP synthesis; homologous to bovine subunit OSCP (oligomycin sensitivity-conferring protein); phosphorylated
BFR2	YDR299W	S000002707	-0.49	3.396	0.481264	19	Essential protein possibly involved in secretion; multicopy suppressor of sensitivity to Brefeldin A
PRO1	YDR300C	S000002708	-0.47	4.183	1.20606	14	Gamma-glutamyl kinase, catalyzes the first step in proline biosynthesis
CFT1	YDR301W	S000002709	-0.78	4.655	0.906702	21	RNA-binding subunit of the mRNA cleavage and polyadenylation factor; involved in poly(A) site recognition and required for both pre-mRNA cleavage and polyadenylation, 51% sequence similarity with mammalian AAUAA-binding subunit of CPSF
GPI11	YDR302W	S000002710	-2.2	2.028	0.867418	1	ER membrane protein involved in a late step of glycosylphosphatidylinositol (GPI) anchor assembly; involved in the addition of phosphoethanolamine to the multiply mannosylated GPI intermediate; human PIG-Fp is a functional homolog
RSC3	YDR303C	S000002711	0.26	2.203	1.31882	26	Component of the RSC chromatin remodeling complex; essential gene required for maintenance of proper ploidy and regulation of ribosomal protein genes and the cell wall/stress response; highly similar to Rsc30p
CPR5	YDR304C	S000002712	0.24	2.342	0.901282	12	Peptidyl-prolyl cis-trans isomerase (cyclophilin) of the endoplasmic reticulum, catalyzes the cis-trans isomerization of peptide bonds N-terminal to proline residues; transcriptionally induced in response to unfolded proteins in the ER
HNT2	YDR305C	S000002713	1.71	2.273	0.805636	3	Dinucleoside triphosphate hydrolase; has similarity to the tumor suppressor FHIT and belongs to the histidine triad (HIT) superfamily of nucleotide-binding proteins
YDR307W	YDR307W	S000002715	-0.42	1.621	1.04628	6	Putative protein of unknown function
GIC2	YDR309C	S000002717	-0.27	2.707	0.409235	3	Redundant rho-like GTPase Cdc42p effector; homolog of Gic1p; involved in initiation of budding and cellular polarization; interacts with Cdc42p via the Cdc42/Rac-interactive binding (CRIB) domain and with PI(4,5)P2 via a polybasic region
SUM1	YDR310C	S000002718	0.39	3.334	1.05541	22	Transcriptional repressor required for mitotic repression of middle sporulation-specific genes; involved in telomere maintenance, regulated by the pachytene checkpoint
TFB1	YDR311W	S000002719	0.5	5.05	0.9973	13	Subunit of TFIIH and nucleotide excision repair factor 3 complexes, required for nucleotide excision repair, target for transcriptional activators
SSF2	YDR312W	S000002720	-0.53	4.536	0.522626	10	Protein required for ribosomal large subunit maturation, functionally redundant with Ssf1p; member of the Brix family
PIB1	YDR313C	S000002721	0.32	1.156	1.47406	5	RING-type ubiquitin ligase of the endosomal and vacuolar membranes, binds phosphatidylinositol(3)-phosphate; contains a FYVE finger domain
OMS1	YDR316W	S000002724	-0.04	2.517	1.27086	7	Protein integral to the mitochondrial membrane; has a conserved methyltransferase motif; multicopy suppressor of respiratory defects caused by OXA1 mutations
SWA2	YDR320C	S000002728	-0.37	1.22	1.59052	19	Auxilin-like protein involved in vesicular transport; clathrin-binding protein required for uncoating of clathrin-coated vesicles
ASP1	YDR321W	S000002729	0.8	5.025	0.69532	9	Cytosolic L-asparaginase, involved in asparagine catabolism
TIM11	YDR322C-A	S000007255	0.06	2.65	1.07488	4	Subunit e of mitochondrial F1F0-ATPase, which is a large, evolutionarily conserved enzyme complex required for ATP synthesis; essential for the dimeric and oligomeric state of ATP synthase
MRPL35	YDR322W	S000002730	-1.05	1.502	1.14667	8	Mitochondrial ribosomal protein of the large subunit
PEP7	YDR323C	S000002731	-1.06	2.183	2.08046	5	Multivalent adaptor protein that facilitates vesicle-mediated vacuolar protein sorting by ensuring high-fidelity vesicle docking and fusion, which are essential for targeting of vesicles to the endosome; required for vacuole inheritance
UTP4	YDR324C	S000002732	-0.69	1.697	0.537915	28	Nucleolar protein, component of the small subunit (SSU) processome containing the U3 snoRNA that is involved in processing of pre-18S rRNA
YCG1	YDR325W	S000002733	0.5	2.621	1.1632	7	Non-SMC subunit of the condensin complex (Smc2p-Smc4p-Ycs4p-Brn1p-Ycg1p); required for establishment and maintenance of chromosome condensation, chromosome segregation and for chromatin binding of the condensin complex
YSP2	YDR326C	S000002734	0.01	3.476	0.636397	23	Protein involved in programmed cell death; mutant shows resistance to cell death induced by amiodarone or intracellular acidification
SKP1	YDR328C	S000002736	-0.43	1.137	0.794765	7	Evolutionarily conserved kinetochore protein that is part of multiple protein complexes, including the SCF ubiquitin ligase complex, the CBF3 complex that binds centromeric DNA, and the RAVE complex that regulates assembly of the V-ATPase
PEX3	YDR329C	S000002737	0.15	1.958	2.28477	4	Peroxisomal membrane protein (PMP) required required for the proper localization and stability of PMPs; interacts with Pex19p
UBX5	YDR330W	S000002738	0.9	1.541	1.04066	13	UBX (ubiquitin regulatory X) domain-containing protein that interacts with Cdc48p
GPI8	YDR331W	S000002739	-1.05	1.935	0.730218	3	ER membrane glycoprotein subunit of the glycosylphosphatidylinositol transamidase complex that adds glycosylphosphatidylinositol (GPI) anchors to newly synthesized proteins; human PIG-K protein is a functional homolog
IRC3	YDR332W	S000002740	0.04	2.404	3.29117	5	Putative protein of unknown function; null mutant displays increased levels of spontaneous Rad52p foci; green fluorescent protein (GFP)-fusion protein localizes to the mitochondrion
YDR333C	YDR333C	S000002741	0.57	3.35	1.28512	12	Putative protein of unknown function
SWR1	YDR334W	S000002742	-0.98	2.639	1.05343	12	Swi2/Snf2-related ATPase that is the structural component of the SWR1 complex, which exchanges histone variant H2AZ (Htz1p) for chromatin-bound histone H2A
MSN5	YDR335W	S000002743	-0.69	2.07	1.40398	32	Karyopherin involved in nuclear import and export; shown to be responsible for nuclear import of replication protein A and for export of several proteins including Swi6p, Far1p, and Pho4p; cargo dissociation involves binding to RanGTP
MRPS28	YDR337W	S000002745	0.1	1.483	0.95396	7	Mitochondrial ribosomal protein of the small subunit
FCF1	YDR339C	S000002747	-0.52	1.835	0.573752	3	Essential nucleolar protein that is a component of the SSU (small subunit) processome involved in the pre-rRNA processing steps of 40S ribosomal subunit biogenesis; contains a PINc domain; copurifies with Faf1p
YDR341C	YDR341C	S000002749	0.69	2.277	0.952143	44	Arginyl-tRNA synthetase, proposed to be cytoplasmic but the authentic, non-tagged protein is detected in highly purified mitochondria in high-throughput studies
HXT7	YDR342C	S000002750	0.08	2.196	0.365514	9	High-affinity glucose transporter of the major facilitator superfamily, nearly identical to Hxt6p, expressed at high basal levels relative to other HXTs, expression repressed by high glucose levels
HXT3	YDR345C	S000002753	-2.84	4.064	0.272381	9	Low affinity glucose transporter of the major facilitator superfamily, expression is induced in low or high glucose conditions
SVF1	YDR346C	S000002754	0	1.107	0.842647	14	Protein with a potential role in cell survival pathways, required for the diauxic growth shift; expression in mammalian cells increases survival under conditions inducing apoptosis
MRP1	YDR347W	S000002755	-0.47	1.232	0.922551	14	Mitochondrial ribosomal protein of the small subunit; MRP1 exhibits genetic interactions with PET122, encoding a COX3-specific translational activator, and with PET123, encoding a small subunit mitochondrial ribosomal protein
YDR348C	YDR348C	S000002756	-0.17	2.019	0.812759	13	Protein of unknown function; green fluorescent protein (GFP)-fusion protein localizes to the cell periphery and bud neck; potential Cdc28p substrate
YPS7	YDR349C	S000002757	-0.88	2.807	0.861546	4	Putative GPI-anchored aspartic protease, located in the cytoplasm and endoplasmic reticulum
SBE2	YDR351W	S000002759	0	1.666	1.35896	5	Protein involved in the transport of cell wall components from the Golgi to the cell surface; required for bud growth
TRR1	YDR353W	S000002761	-1.56	3.299	0.807761	17	Cytoplasmic thioredoxin reductase, key regulatory enzyme that determines the redox state of the thioredoxin system, which acts as a disulfide reductase system and protects cells against both oxidative and reductive stress
TRP4	YDR354W	S000002762	-0.14	2.666	0.88755	7	Anthranilate phosphoribosyl transferase of the tryptophan biosynthetic pathway, catalyzes the phosphoribosylation of anthranilate, subject to the general control system of amino acid biosynthesis
SPC110	YDR356W	S000002764	-0.85	1.844	0.85925	25	Inner plaque spindle pole body (SPB) component, ortholog of human kendrin; involved in connecting nuclear microtubules to SPB; interacts with Tub4p-complex and calmodulin; phosphorylated by Mps1p in cell cycle-dependent manner
YDR357C	YDR357C	S000002765	0.31	3.453	0.0240929	2	Protein of unknown function; green fluorescent protein (GFP)-fusion protein localizes to the cytoplasm in a punctate pattern
GGA1	YDR358W	S000002766	1.65	2.574	2.1202	10	Golgi-localized protein with homology to gamma-adaptin, interacts with and regulates Arf1p and Arf2p in a GTP-dependent manner in order to facilitate traffic through the late Golgi
EAF1	YDR359C	S000002767	0	2.133	1.26813	7	Component of the NuA4 histone acetyltransferase complex; required for initiation of pre-meiotic DNA replication, probably due to its requirement for significant expression of IME1
BCP1	YDR361C	S000002769	-0.2	1.504	0.753929	9	Essential protein involved in nuclear export of Mss4p, which is a lipid kinase that generates phosphatidylinositol 4,5-biphosphate and plays a role in actin cytoskeleton organization and vesicular transport
TFC6	YDR362C	S000002770	1.3	1.798	1.03265	4	One of six subunits of RNA polymerase III transcription initiation factor complex (TFIIIC); part of TFIIIC TauB domain that binds BoxB promoter sites of tRNA and other genes; cooperates with Tfc3p in DNA binding; human homolog is TFIIIC-110
ESC2	YDR363W	S000002771	-1.02	2.293	1.32887	5	Protein involved in mating-type locus silencing, interacts with Sir2p; probably functions to recruit or stabilize Sir proteins
CDC40	YDR364C	S000002772	0.14	2.321	0.839091	3	Pre-mRNA splicing factor, important for catalytic step II of pre-mRNA splicing and plays a role in cell cycle progression; required for DNA synthesis during mitosis and meiosis; has WD repeats
ESF1	YDR365C	S000002773	0.3	2.257	0.678749	12	Nucleolar protein involved in pre-rRNA processing; depletion causes severely decreased 18S rRNA levels
YDR367W	YDR367W	S000002775	-0.82	2.597	0.734355	2	Component of the inositol phosphorylceramide synthase; green fluorescent protein (GFP)-fusion protein localizes to the cytoplasm in a punctate pattern
YPR1	YDR368W	S000002776	1	2.904	1.26936	18	2-methylbutyraldehyde reductase, may be involved in isoleucine catabolism
XRS2	YDR369C	S000002777	-0.57	4.418	1.42598	6	Protein required for DNA repair; component of the Mre11 complex, which is involved in double strand breaks, meiotic recombination, telomere maintenance, and checkpoint signaling
CTS2	YDR371W	S000002779	-1.08	1.848	1.34229	10	Sporulation-specific chitinase
VPS74	YDR372C	S000002780	-0.25	1.947	1.08125	14	Protein required for Golgi localization of glycosyltransferases; binds the cytosolic domains of Golgi glycosyltransferases; functions as a heterotetramer
FRQ1	YDR373W	S000002781	-0.16	1.378	0.941609	4	N-myristoylated calcium-binding protein that may have a role in intracellular signaling through its regulation of the phosphatidylinositol 4-kinase Pik1p; member of the recoverin/frequenin branch of the EF-hand superfamily
YDR374W-A	YDR374W-A	S000113553	0.39	1.92	0.358414	3	Putative protein of unknown function
BCS1	YDR375C	S000002783	-0.93	1.308	1.77633	3	Protein of the mitochondrial inner membrane that functions as an ATP-dependent chaperone, required for the incorporation of the Rip1p and Qcr10p subunits into the cytochrome bc(1) complex; member of the CDC48/PAS1/SEC18 ATPase family
ARH1	YDR376W	S000002784	-0.86	2.018	1.23302	11	Oxidoreductase of the mitochondrial inner membrane, involved in cytoplasmic and mitochondrial iron homeostasis and required for activity of Fe-S cluster-containing enzymes; one of the few mitochondrial proteins essential for viability
ATP17	YDR377W	S000002785	0.89	2.939	1.23063	3	Subunit f of the F0 sector of mitochondrial F1F0 ATP synthase, which is a large, evolutionarily conserved enzyme complex required for ATP synthesis
LSM6	YDR378C	S000002786	0.79	3.497	0.855654	4	Lsm (Like Sm) protein; part of heteroheptameric complexes (Lsm2p-7p and either Lsm1p or 8p): cytoplasmic Lsm1p complex involved in mRNA decay; nuclear Lsm8p complex part of U6 snRNP and possibly involved in processing tRNA, snoRNA, and rRNA
RGA2	YDR379W	S000002787	-0.36	1.879	1.29289	12	GTPase-activating protein for the polarity-establishment protein Cdc42p; implicated in control of septin organization, pheromone response, and haploid invasive growth; regulated by Pho85p and Cdc28p
ARO10	YDR380W	S000002788	0.58	2.203	21.3106	11	Phenylpyruvate decarboxylase, catalyzes decarboxylation of phenylpyruvate to phenylacetaldehyde, which is the first specific step in the Ehrlich pathway
YDR381C-A	YDR381C-A	S000007650	0.04	3.119	0.963395	5	Protein of unknown function, localized to the mitochondrial outer membrane
YRA1	YDR381W	S000002789	-0.08	2.084	0.843933	11	Nuclear protein that binds to RNA and to Mex67p, required for export of poly(A)+ mRNA from the nucleus; member of the REF (RNA and export factor binding proteins) family; another family member, Yra2p, can substitute for Yra1p function
RPP2B	YDR382W	S000002790	-2.45	3.112	0.560214	7	Ribosomal protein P2 beta, a component of the ribosomal stalk, which is involved in the interaction between translational elongation factors and the ribosome; regulates the accumulation of P1 (Rpp1Ap and Rpp1Bp) in the cytoplasm
NKP1	YDR383C	S000002791	-0.22	3.317	0.811127	9	Non-essential kinetochore protein, subunit of the Ctf19 central kinetochore complex (Ctf19p-Mcm21p-Okp1p-Mcm22p-Mcm16p-Ctf3p-Chl4p-Mcm19p-Nkp1p-Nkp2p-Ame1p-Mtw1p)
ATO3	YDR384C	S000002792	2.02	3.529	0.209308	1	Plasma membrane protein, regulation pattern suggests a possible role in export of ammonia from the cell; phosphorylated in mitochondria; member of the TC 9.B.33 YaaH family of putative transporters
EFT2	YDR385W	S000002793	3.56	1.564	0.673815	68	Elongation factor 2 (EF-2), also encoded by EFT1; catalyzes ribosomal translocation during protein synthesis; contains diphthamide, the unique posttranslationally modified histidine residue specifically ADP-ribosylated by diphtheria toxin
RVS167	YDR388W	S000002796	0.23	3.671	1.32033	14	Actin-associated protein, subunit of a complex (Rvs161p-Rvs167p) involved in regulation of actin cytoskeleton, endocytosis, and viability following starvation or osmotic stress; homolog of mammalian amphiphysin
SAC7	YDR389W	S000002797	-2.2	2.592	0.81479	12	GTPase activating protein (GAP) for Rho1p, involved in signaling to the actin cytoskeleton, null mutations suppress tor2 mutations and temperature sensitive mutations in actin; potential Cdc28p substrate
UBA2	YDR390C	S000002798	-0.17	3.059	0.860919	12	Nuclear protein that acts as a heterodimer with Aos1p to activate Smt3p (SUMO) before its conjugation to proteins (sumoylation), which may play a role in protein targeting; essential for viability
YDR391C	YDR391C	S000002799	0.15	1.974	3.02388	7	Putative protein of unknown function, possibly involved in zinc homeostasis; Bdf1p-dependent transcription induced by salt stress; green fluorescent protein (GFP)-fusion protein localizes to both the cytoplasm and the nucleus
SPT3	YDR392W	S000002800	-0.12	4.085	1.75643	6	Subunit of the SAGA and SAGA-like transcriptional regulatory complexes, interacts with Spt15p to activate transcription of some RNA polymerase II-dependent genes, also functions to inhibit transcription at some promoters
RPT3	YDR394W	S000002802	0.57	4.314	1.85485	18	One of six ATPases of the 19S regulatory particle of the 26S proteasome involved in the degradation of ubiquitinated substrates; substrate of N-acetyltransferase B
SXM1	YDR395W	S000002803	-0.35	1.026	0.706788	26	Nuclear transport factor (karyopherin) involved in protein transport between the cytoplasm and nucleoplasm; similar to Nmd5p, Cse1p, Lph2p, and the human cellular apoptosis susceptibility protein, CAS1
NCB2	YDR397C	S000002805	0.14	1.531	0.616608	4	Subunit of a heterodimeric NC2 transcription regulator complex with Bur6p; complex binds to TBP and can repress transcription by preventing preinitiation complex assembly or stimulate activated transcription; homologous to human NC2beta
UTP5	YDR398W	S000002806	-0.62	1.119	0.653281	14	Nucleolar protein, component of the small subunit (SSU) processome containing the U3 snoRNA that is involved in processing of pre-18S rRNA
HPT1	YDR399W	S000002807	-0.2	3.107	0.464838	9	Dimeric hypoxanthine-guanine phosphoribosyltransferase, catalyzes the formation of both inosine monophosphate and guanosine monophosphate; mutations in the human homolog HPRT1 can cause Lesch-Nyhan syndrome and Kelley-Seegmiller syndrome
URH1	YDR400W	S000002808	-0.9	1.625	2.04475	4	Uridine nucleosidase (uridine-cytidine N-ribohydrolase), cleaves N-glycosidic bonds in nucleosides; involved in the pyrimidine salvage and nicotinamide riboside salvage pathways
RPB7	YDR404C	S000002812	0.42	1.981	0.526425	5	RNA polymerase II subunit B16; forms two subunit dissociable complex with Rpb4p
MRP20	YDR405W	S000002813	0.67	2.629	0.992404	5	Mitochondrial ribosomal protein of the large subunit
PDR15	YDR406W	S000002814	-0.73	3.099	0.751164	25	Plasma membrane ATP binding cassette (ABC) transporter, multidrug transporter and general stress response factor implicated in cellular detoxification; regulated by Pdr1p, Pdr3p and Pdr8p; promoter contains a PDR responsive element
TRS120	YDR407C	S000002815	-0.9	3.465	1.63427	26	One of 10 subunits of the transport protein particle (TRAPP) complex of the cis-Golgi which mediates vesicle docking and fusion; involved in endoplasmic reticulum (ER) to Golgi membrane traffic
ADE8	YDR408C	S000002816	-0.15	2.294	0.823934	5	Phosphoribosyl-glycinamide transformylase, catalyzes a step in the 'de novo' purine nucleotide biosynthetic pathway
SIZ1	YDR409W	S000002817	0.24	1.366	0.857376	9	SUMO/Smt3 ligase that promotes the attachment of sumo (Smt3p; small ubiquitin-related modifier) to proteins; binds Ubc9p and may bind septins; specifically required for sumoylation of septins in vivo; localized to the septin ring
STE14	YDR410C	S000002818	0.32	3.22	1.25727	1	Farnesyl cysteine-carboxyl methyltransferase, mediates the carboxyl methylation step during C-terminal CAAX motif processing of a-factor and RAS proteins in the endoplasmic reticulum, localizes to the ER membrane
DFM1	YDR411C	S000002819	-0.26	2.048	1.94588	10	ER localized derlin-like family member involved in ER stress and homeostasis; not involved in ERAD or substrate retrotranslocation; interacts with CDC48; contains four transmembrane domains and two SHP boxes
RRP17	YDR412W	S000002820	-0.1	2.466	0.657973	3	Component of the pre-60S pre-ribosomal particle; required for cell viability
YDR415C	YDR415C	S000002823	-1.12	3.274	2.50142	4	Putative protein of unknown function
SYF1	YDR416W	S000002824	2.31	2.513	1.51	4	Component of the spliceosome complex involved in pre-mRNA splicing; involved in regulation of cell cycle progression; similar to Drosophila crooked neck protein
RPL12B	YDR418W	S000002826	-0.4	1.154	0.553508	12	Protein component of the large (60S) ribosomal subunit, nearly identical to Rpl12Ap; rpl12a rpl12b double mutant exhibits slow growth and slow translation; has similarity to E. coli L11 and rat L12 ribosomal proteins
SIP1	YDR422C	S000002830	-0.81	3.326	0.719916	11	Alternate beta-subunit of the Snf1p kinase complex, may confer substrate specificity; vacuolar protein containing KIS (Kinase-Interacting Sequence) and ASC (Association with Snf1 kinase Complex) domains involved in protein interactions
CAD1	YDR423C	S000002831	0.03	2.027	1.13167	2	AP-1-like bZIP transcriptional activator involved in stress responses, iron metabolism, and pleiotropic drug resistance; controls a set of genes involved in stabilizing proteins; binds consensus sequence TTACTAA; 5' UTR contains uORFs
DYN2	YDR424C	S000002832	0.48	1.576	1.03163	4	Cytoplasmic light chain dynein, microtubule motor protein; proposed to be involved in the assembly of the nuclear pore complex
SNX41	YDR425W	S000002833	-0.19	1.318	1.84689	7	Sorting nexin, involved in the retrieval of late-Golgi SNAREs from the post-Golgi endosome to the trans-Golgi network; interacts with Snx4p
RPN9	YDR427W	S000002835	-1.35	1.754	1.47488	23	Non-ATPase regulatory subunit of the 26S proteasome, has similarity to putative proteasomal subunits in other species; null mutant is temperature sensitive and exhibits cell cycle and proteasome assembly defects
BNA7	YDR428C	S000002836	0.59	3.839	0.767001	5	Formylkynurenine formamidase, involved in the de novo biosynthesis of NAD from tryptophan via kynurenine
TIF35	YDR429C	S000002837	-0.02	1.451	0.854913	12	Subunit of the core complex of translation initiation factor 3(eIF3), which is essential for translation
CYM1	YDR430C	S000002838	0.03	2.914	0.923446	29	Lysine-specific metalloprotease of the mitochondrial intermembrane space, member of the pitrilysin family; degrades proteins and presequence peptides cleaved from imported proteins; required for normal mitochondrial morphology
NPL3	YDR432W	S000002840	-0.02	2.195	0.78328	11	RNA-binding protein that carries poly(A)+ mRNA from the nucleus into the cytoplasm; dissociation from mRNAs is promoted by Mtr10p; phosphorylated by Sky1p in the cytoplasm
GPI17	YDR434W	S000002842	-1.23	2.511	0.940402	8	Transmembrane protein subunit of the glycosylphosphatidylinositol transamidase complex that adds GPIs to newly synthesized proteins; human PIG-Sp homolog
PPM1	YDR435C	S000002843	-0.37	1.706	1.09536	12	Carboxyl methyltransferase, methylates the C terminus of the protein phosphatase 2A catalytic subunit (Pph21p or Pph22p), which is important for complex formation with regulatory subunits
PPZ2	YDR436W	S000002844	-0.97	2.13	1.44683	11	Serine/threonine protein phosphatase Z, isoform of Ppz1p; involved in regulation of potassium transport, which affects osmotic stability, cell cycle progression, and halotolerance
LRS4	YDR439W	S000002847	-1.08	5.437	0.843231	3	Protein involved in rDNA silencing; positively charged coiled-coil protein with limited similarity to myosin
DOT1	YDR440W	S000002848	0.54	4.061	0.919136	6	Nucleosomal histone H3-Lys79 methylase, associates with transcriptionally active genes, functions in gene silencing at telomeres, most likely by directly modulating chromatin structure and Sir protein localization
APT2	YDR441C	S000002849	0.08	1.401	0.607097	3	Apparent pseudogene, not transcribed or translated under normal conditions; encodes a protein with similarity to adenine phosphoribosyltransferase, but artificially expressed protein exhibits no enzymatic activity
SSN2	YDR443C	S000002851	-0.49	4.992	1.46495	12	Subunit of the RNA polymerase II mediator complex; associates with core polymerase subunits to form the RNA polymerase II holoenzyme; required for stable association of Srb10p-Srb11p kinase; essential for transcriptional regulation
YDR444W	YDR444W	S000002852	0.23	3.648	1.16401	4	Putative protein of unknown function
RPS17B	YDR447C	S000002855	0.29	2.156	0.558721	11	Ribosomal protein 51 (rp51) of the small (40s) subunit; nearly identical to Rps17Ap and has similarity to rat S17 ribosomal protein
ADA2	YDR448W	S000002856	1.1	3.293	0.88629	8	Transcription coactivator, component of the ADA and SAGA transcriptional adaptor/HAT (histone acetyltransferase) complexes
UTP6	YDR449C	S000002857	0.42	1.519	0.798575	14	Nucleolar protein, component of the small subunit (SSU) processome containing the U3 snoRNA that is involved in processing of pre-18S rRNA
RPS18A	YDR450W	S000002858	0.38	1.522	0.590108	18	Protein component of the small (40S) ribosomal subunit; nearly identical to Rps18Bp and has similarity to E. coli S13 and rat S18 ribosomal proteins
PPN1	YDR452W	S000002860	-0.27	4.229	1.02406	13	Vacuolar endopolyphosphatase with a role in phosphate metabolism; functions as a homodimer
TSA2	YDR453C	S000002861	-0.68	1.449	4.06175	7	Stress inducible cytoplasmic thioredoxin peroxidase; cooperates with Tsa1p in the removal of reactive oxygen, nitrogen and sulfur species using thioredoxin as hydrogen donor; deletion enhances the mutator phenotype of tsa1 mutants
GUK1	YDR454C	S000002862	-0.24	3.967	0.825305	9	Guanylate kinase, converts GMP to GDP; required for growth and mannose outer chain elongation of cell wall N-linked glycoproteins
NHX1	YDR456W	S000002864	0.06	2.844	0.827195	1	Endosomal Na+/H+ exchanger, required for intracellular sequestration of Na+; required for osmotolerance to acute hypertonic shock
TOM1	YDR457W	S000002865	0.74	1.596	1.25458	73	E3 ubiquitin ligase of the hect-domain class; has a role in mRNA export from the nucleus and may regulate transcriptional coactivators
HEH2	YDR458C	S000002866	-0.32	3.729	0.944289	13	Inner nuclear membrane (INM) protein; contains helix-extension-helix (HEH) motif, nuclear localization signal sequence; targeting to the INM requires the Srp1p-Kap95p karyopherins and the Ran cycle
TFB3	YDR460W	S000002868	-1.16	1.613	0.963128	11	Subunit of TFIIH and nucleotide excision repair factor 3 complexes, involved in transcription initiation, required for nucleotide excision repair; ring finger protein similar to mammalian CAK and TFIIH subunit
YDR461C-A	YDR461C-A	S000087209	0.54	3.687	1.67999	2	Putative protein of unknown function
MRPL28	YDR462W	S000002870	-0.12	2.416	0.720315	3	Mitochondrial ribosomal protein of the large subunit
STP1	YDR463W	S000002871	-0.39	1.642	0.305872	3	Transcription factor, activated by proteolytic processing in response to signals from the SPS sensor system for external amino acids; activates transcription of amino acid permease genes and may have a role in tRNA processing
SPP41	YDR464W	S000002872	1.1	1.557	0.471703	12	Protein involved in negative regulation of expression of spliceosome components PRP4 and PRP3
RMT2	YDR465C	S000002873	-0.53	3.707	0.677997	6	Arginine methyltransferase; ribosomal protein L12 is a substrate
PKH3	YDR466W	S000002874	0.83	2.973	1.37989	16	Protein kinase with similarity to mammalian phosphoinositide-dependent kinase 1 (PDK1) and yeast Pkh1p and Pkh2p, two redundant upstream activators of Pkc1p; identified as a multicopy suppressor of a pkh1 pkh2 double mutant
TLG1	YDR468C	S000002876	-0.75	2.228	0.784176	2	Essential t-SNARE that forms a complex with Tlg2p and Vti1p and mediates fusion of endosome-derived vesicles with the late Golgi; binds the docking complex VFT (Vps fifty-three) through interaction with Vps51p
SDC1	YDR469W	S000002877	-1.82	3.598	0.908684	5	Subunit of the COMPASS (Set1C) complex, which methylates histone H3 on lysine 4 and is required in transcriptional silencing near telomeres; has similarity to C. elegans Dpy-30
UGO1	YDR470C	S000002878	0.23	1.657	1.75285	4	Protein of unknown function; outer membrane component of the mitochondrial fusion machinery; Ugo1p bind directly to Fzo1p and Mgm1p and thereby link these two GTPases during mitochondrial fusion
RPL27B	YDR471W	S000002879	-0.38	2.197	0.632045	12	Protein component of the large (60S) ribosomal subunit, nearly identical to Rpl27Ap and has similarity to rat L27 ribosomal protein
TRS31	YDR472W	S000002880	-0.74	2.356	0.84288	11	One of 10 subunits of the transport protein particle (TRAPP) complex of the cis-Golgi which mediates vesicle docking and fusion; involved in endoplasmic reticulum (ER) to Golgi membrane traffic
PRP3	YDR473C	S000002881	2.17	2.884	1.31513	3	Splicing factor, component of the U4/U6-U5 snRNP complex
JIP4	YDR475C	S000002883	2.44	1.731	1.08802	5	Protein of unknown function; previously annotated as two separate ORFs, YDR474C and YDR475C, which were merged as a result of corrections to the systematic reference sequence
YDR476C	YDR476C	S000002884	1.97	4.247	3.08357	5	Putative protein of unknown function; green fluorescent protein (GFP)-fusion protein localizes to the endoplasmic reticulum; YDR476C is not an essential gene
SNF1	YDR477W	S000002885	0.45	1.566	1.01501	21	AMP-activated serine/threonine protein kinase found in a complex containing Snf4p and members of the Sip1p/Sip2p/Gal83p family; required for transcription of glucose-repressed genes, thermotolerance, sporulation, and peroxisome biogenesis
DIG2	YDR480W	S000002888	-3.78	2.087	1.22918	4	Regulatory protein of unknown function, pheromone-inducible, involved in the regulation of mating-specific genes and the invasive growth pathway, required for MAP-kinase imposed repression, inhibits pheromone-responsive transcription
PHO8	YDR481C	S000002889	-0.04	5.841	1.21046	16	Repressible alkaline phosphatase, a glycoprotein localized to the vacuole; regulated by levels of inorganic phosphate and by a system consisting of Pho4p, Pho9p, Pho80p, Pho81p and Pho85p; dephosphorylates phosphotyrosyl peptides
CWC21	YDR482C	S000002890	-0.3	2.411	1.32216	1	Component of a complex containing Cef1p, putatively involved in pre-mRNA splicing; may bind RNA; has similarity to S. pombe Cwf21p
KRE2	YDR483W	S000002891	0.67	2.631	0.802626	15	Alpha1,2-mannosyltransferase of the Golgi involved in protein mannosylation
VPS52	YDR484W	S000002892	0.88	4.929	1.66734	4	Component of the GARP (Golgi-associated retrograde protein) complex, Vps51p-Vps52p-Vps53p-Vps54p, which is required for the recycling of proteins from endosomes to the late Golgi; involved in localization of actin and chitin
VPS72	YDR485C	S000002893	0.2	2.622	0.777061	9	Htz1p-binding component of the SWR1 complex, which exchanges histone variant H2AZ (Htz1p) for chromatin-bound histone H2A; required for vacuolar protein sorting
VPS60	YDR486C	S000002894	1.44	2.801	0.842618	2	Cytoplasmic and vacuolar membrane protein involved in late endosome to vacuole transport; required for normal filament maturation during pseudohyphal growth; may function in targeting cargo proteins for degradation; interacts with Vta1p
RIB3	YDR487C	S000002895	-0.76	2.997	0.791905	11	3,4-dihydroxy-2-butanone-4-phosphate synthase (DHBP synthase), required for riboflavin biosynthesis from ribulose-5-phosphate, also has an unrelated function in mitochondrial respiration
SLD5	YDR489W	S000002897	-2.44	2.887	0.976539	2	Subunit of the GINS complex (Sld5p, Psf1p, Psf2p, Psf3p), which is localized to DNA replication origins and implicated in assembly of the DNA replication machinery
PKH1	YDR490C	S000002898	1.11	3.713	1.65153	11	Serine/threonine protein kinase involved in sphingolipid-mediated signaling pathway that controls endocytosis; activates Ypk1p and Ykr2p, components of signaling cascade required for maintenance of cell wall integrity; redundant with Pkh2p
YDR493W	YDR493W	S000002901	0.85	3.517	0.996989	2	Protein of unknown function; non-tagged protein detected in purified mitochondria in high-throughput studies; null mutant displays decreased frequency of mitochondrial genome loss and severe growth defect in minimal glycerol media
RSM28	YDR494W	S000002902	-0.39	1.777	1.23277	3	Mitochondrial ribosomal protein of the small subunit; genetic interactions suggest a possible role in promoting translation initiation
VPS3	YDR495C	S000002903	0.21	3.004	1.15573	9	Component of CORVET tethering complex; cytoplasmic protein required for the sorting and processing of soluble vacuolar proteins, acidification of the vacuolar lumen, and assembly of the vacuolar H+-ATPase
PUF6	YDR496C	S000002904	0.29	2.383	0.736445	18	Pumilio-homology domain protein that binds ASH1 mRNA at PUF consensus sequences in the 3' UTR and represses its translation, resulting in proper asymmetric localization of ASH1 mRNA
ITR1	YDR497C	S000002905	-0.74	2.378	0.32375	4	Myo-inositol transporter with strong similarity to the minor myo-inositol transporter Itr2p, member of the sugar transporter superfamily; expression is repressed by inositol and choline via Opi1p and derepressed via Ino2p and Ino4p
SEC20	YDR498C	S000002906	0.3	2.895	0.990274	5	Membrane glycoprotein v-SNARE involved in retrograde transport from the Golgi to the ER; required for N- and O-glycosylation in the Golgi but not in the ER; forms a complex with the cytosolic Tip20p
RPL37B	YDR500C	S000002908	-0.35	1.693	0.637866	6	Protein component of the large (60S) ribosomal subunit, has similarity to Rpl37Ap and to rat L37 ribosomal protein
SAM2	YDR502C	S000002910	0.82	2.236	1.01003	24	S-adenosylmethionine synthetase, catalyzes transfer of the adenosyl group of ATP to the sulfur atom of methionine; one of two differentially regulated isozymes (Sam1p and Sam2p)
LPP1	YDR503C	S000002911	0.45	2.249	1.9857	2	Lipid phosphate phosphatase, catalyzes Mg(2+)-independent dephosphorylation of phosphatidic acid (PA), lysophosphatidic acid, and diacylglycerol pyrophosphate; involved in control of the cellular levels of phosphatidylinositol and PA
PSP1	YDR505C	S000002913	0.05	2.592	1.71309	17	Asn and gln rich protein of unknown function; high-copy suppressor of POL1 (DNA polymerase alpha) and partial suppressor of CDC2 (polymerase delta) and CDC6 (pre-RC loading factor) mutations; overexpression results in growth inhibition
YDR506C	YDR506C	S000002914	-0.66	2.998	1.35679	7	Possible membrane-localized protein
GIN4	YDR507C	S000002915	0.17	1.757	1.2314	29	Protein kinase involved in bud growth and assembly of the septin ring, proposed to have kinase-dependent and kinase-independent activities; undergoes autophosphorylation; similar to Kcc4p and Hsl1p
GNP1	YDR508C	S000002916	-0.48	1.866	0.50569	12	High-affinity glutamine permease, also transports Leu, Ser, Thr, Cys, Met and Asn; expression is fully dependent on Grr1p and modulated by the Ssy1p-Ptr3p-Ssy5p (SPS) sensor of extracellular amino acids
SMT3	YDR510W	S000002918	-1.18	2.696	0.812393	6	Ubiquitin-like protein of the SUMO family, conjugated to lysine residues of target proteins; regulates chromatid cohesion, chromosome segregation, APC-mediated proteolysis, DNA replication and septin ring dynamics
ACN9	YDR511W	S000002919	-0.2	1.041	1.06441	4	Protein of the mitochondrial intermembrane space, required for acetate utilization and gluconeogenesis; has orthologs in higher eukaryotes
EMI1	YDR512C	S000002920	0.25	2.921	0.672404	1	Non-essential protein of unknown function required for transcriptional induction of the early meiotic-specific transcription factor IME1, also required for sporulation
GRX2	YDR513W	S000002921	-0.31	1.023	1.36718	8	Cytoplasmic glutaredoxin, thioltransferase, glutathione-dependent disulfide oxidoreductase involved in maintaining redox state of target proteins, also exhibits glutathione peroxidase activity, expression induced in response to stress
YDR514C	YDR514C	S000002922	-2.13	1.834	1.06703	4	Putative protein of unknown function
SLF1	YDR515W	S000002923	0.18	1.774	0.965334	5	RNA binding protein that associates with polysomes; proposed to be involved in regulating mRNA translation; involved in the copper-dependent mineralization of copper sulfide complexes on cell surface in cells cultured in copper salts
EMI2	YDR516C	S000002924	-2.47	3.349	1.28176	26	Non-essential protein of unknown function required for transcriptional induction of the early meiotic-specific transcription factor IME1; required for sporulation; expression is regulated by glucose-repression transcription factors Mig1/2p
GRH1	YDR517W	S000002925	2.08	2.578	0.93174	8	Acetylated, cis-golgi localized protein involved in ER to Golgi transport; homolog of human GRASP65; forms a complex with the coiled-coil protein Bug1p; mutants are compromised for the fusion of ER-derived vesicles with Golgi membranes
EUG1	YDR518W	S000002926	0.6	2.303	2.3827	13	Protein disulfide isomerase of the endoplasmic reticulum lumen, function overlaps with that of Pdi1p; may interact with nascent polypeptides in the ER
FPR2	YDR519W	S000002927	-0.08	1.266	1.30989	5	Membrane-bound peptidyl-prolyl cis-trans isomerase (PPIase), binds to the drugs FK506 and rapamycin; expression pattern suggests possible involvement in ER protein trafficking
URC2	YDR520C	S000002928	0.39	1.543	0.497752	2	Putative transcription factor; contains the (Zn(II)2Cys6 motif; GFP-fusion protein localizes to the cytoplasm and nucleus; null mutant is viable and sensitive to caffeine; similar to the S. Kluyveri URC2 uracil catabolism gene
SNA2	YDR525W-A	S000007236	0.17	1.39	0.689394	1	Protein of unknown function, has similarity to Pmp3p, which is involved in cation transport; green fluorescent protein (GFP)-fusion protein localizes to the cytoplasm in a punctate pattern
RBA50	YDR527W	S000002935	-0.5	3.231	0.734712	10	Protein involved in transcription; interacts with RNA polymerase II subunits Rpb2p, Rpb3, and Rpb11p; has similarity to human RPAP1
QCR7	YDR529C	S000002937	-0.99	2.941	1.30053	7	Subunit 7 of the ubiquinol cytochrome-c reductase complex, which is a component of the mitochondrial inner membrane electron transport chain; oriented facing the mitochondrial matrix; N-terminus appears to play a role in complex assembly
APA2	YDR530C	S000002938	1.04	3.795	1.37454	6	Diadenosine 5',5''-P1,P4-tetraphosphate phosphorylase II (AP4A phosphorylase), involved in catabolism of bis(5'-nucleosidyl) tetraphosphates; has similarity to Apa1p
YDR531W	YDR531W	S000002939	2.51	2.052	0.74185	9	Pantothenate kinase (ATP:D-pantothenate 4'-phosphotransferase, EC 2.7.1.33); catalyzes the first committed step in the universal biosynthetic pathway leading to coenzyme A1
YDR532C	YDR532C	S000002940	0.41	2.572	0.932386	3	Protein of unknown function that localizes to the nuclear side of the spindle pole body and along short spindles; deletion mutants have short telomeres; forms a complex with Spc105p
HSP31	YDR533C	S000002941	0.21	1.674	3.25893	11	Possible chaperone and cysteine protease with similarity to E. coli Hsp31; member of the DJ-1/ThiJ/PfpI superfamily, which includes human DJ-1 involved in Parkinson's disease; exists as a dimer and contains a putative metal-binding site
YDR539W	YDR539W	S000002947	0.67	2.534	1.0274	14	Putative protein of unknown function; green fluorescent protein (GFP)-fusion protein localizes to the cytoplasm; YDR539W is not an essential gene; homolog of E. coli UbiD
IRC4	YDR540C	S000002948	-0.87	3.835	3.48558	2	Putative protein of unknown function; null mutant displays increased levels of spontaneous Rad52p foci; green fluorescent protein (GFP)-fusion protein localizes to the cytoplasm and nucleus
YRF1-1	YDR545W	S000002953	-0.64	1.464	9.19947	2	Helicase encoded by the Y' element of subtelomeric regions, highly expressed in the mutants lacking the telomerase component TLC1; potentially phosphorylated by Cdc28p
IRC22	YEL001C	S000000727	0.24	1.857	0.741285	3	Putative protein of unknown function; green fluorescent protein (GFP)-fusion localizes to the ER; YEL001C is non-essential; null mutant displays increased levels of spontaneous Rad52p foci
WBP1	YEL002C	S000000728	-0.18	1.839	1.05702	14	Beta subunit of the oligosaccharyl transferase (OST) glycoprotein complex; required for N-linked glycosylation of proteins in the endoplasmic reticulum
GIM4	YEL003W	S000000729	0.32	1.772	0.652749	5	Subunit of the heterohexameric cochaperone prefoldin complex which binds specifically to cytosolic chaperonin and transfers target proteins to it
YEA6	YEL006W	S000000732	-0.12	2.088	1.70161	3	Putative mitochondrial NAD+ transporter, member of the mitochondrial carrier subfamily (see also YIA6); has putative human ortholog
YEL007W	YEL007W	S000000733	-0.4	1.687	1.18386	7	Putative protein with sequence similarity to S. pombe gti1+ (gluconate transport inducer 1)
GLC3	YEL011W	S000000737	0.4	2.665	2.66734	25	Glycogen branching enzyme, involved in glycogen accumulation; green fluorescent protein (GFP)-fusion protein localizes to the cytoplasm in a punctate pattern
UBC8	YEL012W	S000000738	-0.45	3.172	1.51992	3	Ubiquitin-conjugating enzyme that negatively regulates gluconeogenesis by mediating the glucose-induced ubiquitination of fructose-1,6-bisphosphatase (FBPase); cytoplasmic enzyme that catalyzes the ubiquitination of histones in vitro
VAC8	YEL013W	S000000739	-1.1	1.948	1.02505	18	Phosphorylated vacuolar membrane protein that interacts with Atg13p, required for the cytoplasm-to-vacuole targeting (Cvt) pathway; interacts with Nvj1p to form nucleus-vacuole junctions
EDC3	YEL015W	S000000741	0.8	5.051	1.22744	14	Non-essential conserved protein of unknown function, plays a role in mRNA decapping by specifically affecting the function of the decapping enzyme Dcp1p; localizes to cytoplasmic mRNA processing bodies
GTT3	YEL017W	S000000743	-0.23	3.435	0.686818	5	Protein of unknown function with a possible role in glutathione metabolism, as suggested by computational analysis of large-scale protein-protein interaction data; GFP-fusion protein localizes to the nuclear periphery
EAF5	YEL018W	S000000744	1.47	2.392	0.486058	5	Esa1p-associated factor, non-essential subunit of the NuA4 acetyltransferase complex
YEL020C	YEL020C	S000000746	0.35	1.77	1.48442	9	Hypothetical protein with low sequence identity to Pdc1p
TIM9	YEL020W-A	S000007256	0.54	2.828	0.846276	4	Mitochondrial intermembrane space protein, forms a complex with Mrs11p/Tim10p that mediates import and insertion of a subset of polytopic inner membrane proteins; may prevent aggregation of incoming proteins in a chaperone-like manner
GEA2	YEL022W	S000000748	-0.21	2.229	1.28045	34	Guanine nucleotide exchange factor for ADP ribosylation factors (ARFs), involved in vesicular transport between the Golgi and ER, Golgi organization, and actin cytoskeleton organization; similar to but not functionally redundant with Gea1p
RIP1	YEL024W	S000000750	0.87	3.289	1.25806	6	Ubiquinol-cytochrome-c reductase, a Rieske iron-sulfur protein of the mitochondrial cytochrome bc1 complex; transfers electrons from ubiquinol to cytochrome c1 during respiration
SNU13	YEL026W	S000000752	-0.7	5.077	0.641268	6	RNA binding protein, part of U3 snoRNP involved in rRNA processing, part of U4/U6-U5 tri-snRNP involved in mRNA splicing, similar to human 15.5K protein
CUP5	YEL027W	S000000753	0.37	2.913	0.821197	1	Proteolipid subunit of the vacuolar H(+)-ATPase V0 sector (subunit c; dicyclohexylcarbodiimide binding subunit); required for vacuolar acidification and important for copper and iron metal ion homeostasis
BUD16	YEL029C	S000000755	-0.56	3.276	0.73344	6	Putative pyridoxal kinase, key enzyme in vitamin B6 metabolism; involved in maintaining levels of pyridoxal 5'-phosphate, the active form of vitamin B6; required for genome integrity; homolog of E. coli PdxK; involved in bud-site selection
ECM10	YEL030W	S000000756	0.68	1.876	1.09771	9	Heat shock protein of the Hsp70 family, localized in mitochondrial nucleoids, plays a role in protein translocation, interacts with Mge1p in an ATP-dependent manner; overexpression induces extensive mitochondrial DNA aggregations
SPF1	YEL031W	S000000757	-0.99	2.721	1.79024	52	P-type ATPase, ion transporter of the ER membrane involved in ER function and Ca2+ homeostasis; required for regulating Hmg2p degradation; confers sensitivity to a killer toxin (SMKT) produced by Pichia farinosa KK1
MCM3	YEL032W	S000000758	-0.38	2.92	0.695586	35	Protein involved in DNA replication; component of the Mcm2-7 hexameric complex that binds chromatin as a part of the pre-replicative complex
HYP2	YEL034W	S000000760	-0.02	1.971	0.85441	7	Translation initiation factor eIF-5A, promotes formation of the first peptide bond; similar to and functionally redundant with Anb1p; possible role in translation elongation; undergoes an essential hypusination modification
ANP1	YEL036C	S000000762	0.6	3.909	0.96413	10	Subunit of the alpha-1,6 mannosyltransferase complex; type II membrane protein; has a role in retention of glycosyltransferases in the Golgi; involved in osmotic sensitivity and resistance to aminonitrophenyl propanediol
RAD23	YEL037C	S000000763	-1.9	2.229	0.792674	11	Protein with ubiquitin-like N terminus, recognizes and binds damaged DNA (with Rad4p) during nucleotide excision repair; regulates Rad4p levels, subunit of Nuclear Excision Repair Factor 2 (NEF2); homolog of human HR23A and HR23B proteins
UTR4	YEL038W	S000000764	-0.17	1.539	0.963863	9	Protein of unknown function with sequence similarity to 2,3-diketo-5-methylthiopentyl-1-phosphate enolase-phosphatases, found in both the cytoplasm and nucleus
CYC7	YEL039C	S000000765	0.02	1.287	0.86814	5	Cytochrome c isoform 2, expressed under hypoxic conditions; electron carrier of the mitochondrial intermembrane space that transfers electrons from ubiquinone-cytochrome c oxidoreductase to cytochrome c oxidase during cellular respiration
UTR2	YEL040W	S000000766	-0.32	3.099	0.225758	4	Cell wall protein that functions in the transfer of chitin to beta(1-6)glucan; putative chitin transglycosidase; glycosylphosphatidylinositol (GPI)-anchored protein localized to the bud neck; has a role in cell wall maintenance
YEF1	YEL041W	S000000767	0.31	1.349	1.87306	3	ATP-NADH kinase; phosphorylates both NAD and NADH; homooctameric structure consisting of 60-kDa subunits; sequence similarity to Utr1p and Pos5p; overexpression complements certain pos5 phenotypes
GDA1	YEL042W	S000000768	1.73	2.591	0.477294	10	Guanosine diphosphatase located in the Golgi, involved in the transport of GDP-mannose into the Golgi lumen by converting GDP to GMP after mannose is transferred its substrate
YEL043W	YEL043W	S000000769	3.25	3.16	0.954026	12	Predicted cytoskeleton protein involved in intracellular signalling based on quantitative analysis of protein-protein interaction maps; may interact with ribosomes, based on co-purification studies; contains fibronectin type III domain fold
IES6	YEL044W	S000000770	0.07	1.373	1.03061	5	Protein that associates with the INO80 chromatin remodeling complex under low-salt conditions
GLY1	YEL046C	S000000772	-0.19	1.168	0.42762	15	Threonine aldolase, catalyzes the cleavage of L-allo-threonine and L-threonine to glycine; involved in glycine biosynthesis
YEL047C	YEL047C	S000000773	2.11	1.845	1.12896	27	Soluble fumarate reductase, required with isoenzyme Osm1p for anaerobic growth; may interact with ribosomes, based on co-purification experiments; authentic, non-tagged protein is detected in purified mitochondria in high-throughput studies
YEL048C	YEL048C	S000000774	-0.33	1.944	0.849479	2	Putative protein of unknown function; synthetic lethal with gcs1delta
RML2	YEL050C	S000000776	0.46	1.022	1.17239	4	Mitochondrial ribosomal protein of the large subunit, has similarity to E. coli L2 ribosomal protein; fat21 mutant allele causes inability to utilize oleate and may interfere with activity of the Adr1p transcription factor
VMA8	YEL051W	S000000777	-1.53	3.315	0.862966	6	Subunit D of the eight-subunit V1 peripheral membrane domain of the vacuolar H+-ATPase (V-ATPase), an electrogenic proton pump found throughout the endomembrane system; plays a role in the coupling of proton transport and ATP hydrolysis
AFG1	YEL052W	S000000778	0.75	4.023	1.51645	13	Conserved protein that may act as a chaperone in the degradation of misfolded or unassembled cytochrome c oxidase subunits; localized to matrix face of the mitochondrial inner membrane; member of the AAA family but lacks a protease domain
MAK10	YEL053C	S000000779	1.84	2.813	0.886382	7	Non-catalytic subunit of N-terminal acetyltransferase of the NatC type, required for replication of dsRNA virus; expression is glucose-repressible
POL5	YEL055C	S000000781	0.69	2.947	0.980915	29	DNA Polymerase phi; has sequence similarity to the human MybBP1A and weak sequence similarity to B-type DNA polymerases, not required for chromosomal DNA replication; required for the synthesis of rRNA
HAT2	YEL056W	S000000782	-0.28	2.223	0.883836	10	Subunit of the Hat1p-Hat2p histone acetyltransferase complex; required for high affinity binding of the complex to free histone H4, thereby enhancing Hat1p activity; similar to human RbAp46 and 48; has a role in telomeric silencing
PCM1	YEL058W	S000000784	0.28	1.232	1.32629	22	Essential N-acetylglucosamine-phosphate mutase; converts GlcNAc-6-P to GlcNAc-1-P, which is a precursor for the biosynthesis of chitin and for the formation of N-glycosylated mannoproteins and glycosylphosphatidylinositol anchors
PRB1	YEL060C	S000000786	-0.12	1.482	6.9644	24	Vacuolar proteinase B (yscB), a serine protease of the subtilisin family; involved in protein degradation in the vacuole and required for full protein degradation during sporulation
CIN8	YEL061C	S000000787	0.04	3.987	2.56312	10	Kinesin motor protein involved in mitotic spindle assembly and chromosome segregation
NPR2	YEL062W	S000000788	0.85	2.145	1.211	3	Protein with a possible role in regulating expression of nitrogen permeases; transcription is induced in response to proline and urea; contains two PEST sequences; null mutant is resistant to cisplatin and doxorubicin
HPA3	YEL066W	S000000792	0.32	1.755	0.708088	7	D-Amino acid N-acetyltransferase, catalyzes N-acetylation of D-amino acids through ordered bi-bi mechanism in which acetyl-CoA is first substrate bound and CoA is last product liberated; similar to Hpa2p, acetylates histones weakly in vitro
DLD3	YEL071W	S000000797	2.66	5.488	0.409689	19	D-lactate dehydrogenase, part of the retrograde regulon which consists of genes whose expression is stimulated by damage to mitochondria and reduced in cells grown with glutamate as the sole nitrogen source, located in the cytoplasm
MNN1	YER001W	S000000803	-0.31	1.989	0.575066	21	Alpha-1,3-mannosyltransferase, integral membrane glycoprotein of the Golgi complex, required for addition of alpha1,3-mannose linkages to N-linked and O-linked oligosaccharides, one of five S. cerevisiae proteins of the MNN1 family
NOP16	YER002W	S000000804	1.69	2.144	0.52807	7	Constituent of 66S pre-ribosomal particles, involved in 60S ribosomal subunit biogenesis
PMI40	YER003C	S000000805	1.04	1.24	1.50264	23	Mannose-6-phosphate isomerase, catalyzes the interconversion of fructose-6-P and mannose-6-P; required for early steps in protein mannosylation
FMP52	YER004W	S000000806	-1.57	2.594	0.835146	9	Protein of unknown function, localized to the mitochondrial outer membrane; induced by treatment with 8-methoxypsoralen and UVA irradiation
YND1	YER005W	S000000807	1.11	2.575	0.546919	7	Apyrase with wide substrate specificity, involved in preventing the inhibition of glycosylation by hydrolyzing nucleoside tri- and diphosphates which are inhibitors of glycotransferases; partially redundant with Gda1p
NUG1	YER006W	S000000808	0.35	3.67	0.629139	20	GTPase that associates with nuclear 60S pre-ribosomes, required for export of 60S ribosomal subunits from the nucleus
TMA20	YER007C-A	S000002957	-0.73	2.175	0.949605	8	Protein of unknown function that associates with ribosomes and has a putative RNA binding domain; interacts with Tma22p; null mutant exhibits translation defects; has homology to human oncogene MCT-1
PAC2	YER007W	S000000809	0.36	2.593	2.59125	2	Microtubule effector required for tubulin heterodimer formation, binds alpha-tubulin, required for normal microtubule function, null mutant exhibits cold-sensitive microtubules and sensitivity to benomyl
SEC3	YER008C	S000000810	1.45	2.505	1.27438	18	Non-essential subunit of the exocyst complex (Sec3p, Sec5p, Sec6p, Sec8p, Sec10p, Sec15p, Exo70p, Exo84p) which mediates targeting of post-Golgi vesicles to sites of active exocytosis; Sec3p specifically is a spatial landmark for secretion
NTF2	YER009W	S000000811	2.11	3.654	0.672078	5	Nuclear envelope protein, interacts with GDP-bound Gsp1p and with proteins of the nuclear pore to transport Gsp1p into the nucleus where it is an essential player in nucleocytoplasmic transport
YER010C	YER010C	S000000812	-2.89	4.056	0.914909	4	Protein of unknown function, forms a ring-shaped homotrimer; has similarity to members of the prokaryotic rraA family; possibly involved in a phosphotransfer reaction
PRE1	YER012W	S000000814	0.25	1.348	1.06862	6	Beta 4 subunit of the 20S proteasome; localizes to the nucleus throughout the cell cycle
PRP22	YER013W	S000000815	-0.74	3.013	1.28512	5	DEAH-box RNA-dependent ATPase/ATP-dependent RNA helicase, associates with lariat intermediates before the second catalytic step of splicing; mediates ATP-dependent mRNA release from the spliceosome and unwinds RNA duplexes
HEM14	YER014W	S000000816	0.61	1.564	1.31089	12	Protoporphyrinogen oxidase, a mitochondrial enzyme that catalyzes the seventh step in the heme biosynthetic pathway, converting protoporphyrinogen IX to protoporphyrin IX
FAA2	YER015W	S000000817	-0.26	1.986	1.73941	5	Long chain fatty acyl-CoA synthetase; accepts a wider range of acyl chain lengths than Faa1p, preferring C9:0-C13:0; involved in the activation of endogenous pools of fatty acids
BIM1	YER016W	S000000818	-0.41	4.471	1.00486	11	Microtubule-binding protein that together with Kar9p makes up the cortical microtubule capture site and delays the exit from mitosis when the spindle is oriented abnormally
AFG3	YER017C	S000000819	-0.53	2.507	2.06845	14	Component, with Yta12p, of the mitochondrial inner membrane m-AAA protease that mediates degradation of misfolded or unassembled proteins and is also required for correct assembly of mitochondrial enzyme complexes
SPC25	YER018C	S000000820	0.05	4.282	0.812985	3	Component of the evolutionarily conserved kinetochore-associated Ndc80 complex (Ndc80p-Nuf2p-Spc24p-Spc25p); involved in chromosome segregation, spindle checkpoint activity and kinetochore clustering
SBH2	YER019C-A	S000002127	-0.52	3.446	0.688558	1	Ssh1p-Sss1p-Sbh2p complex component, involved in protein translocation into the endoplasmic reticulum; homologous to Sbh1p
ISC1	YER019W	S000000821	0.18	1.924	1.05669	8	Mitochondrial membrane localized inositol phosphosphingolipid phospholipase C, hydrolyzes complex sphingolipids to produce ceramide; activated by phosphatidylserine, cardiolipin, and phosphatidylglycerol; mediates Na+ and Li+ halotolerance
GPA2	YER020W	S000000822	0.94	2.859	1.76841	16	Nucleotide binding alpha subunit of the heterotrimeric G protein that interacts with the receptor Gpr1p, has signaling role in response to nutrients; green fluorescent protein (GFP)-fusion protein localizes to the cell periphery
RPN3	YER021W	S000000823	-0.39	1.093	1.48147	22	Essential, non-ATPase regulatory subunit of the 26S proteasome lid, similar to the p58 subunit of the human 26S proteasome; temperature-sensitive alleles cause metaphase arrest, suggesting a role for the proteasome in cell cycle control
SRB4	YER022W	S000000824	-0.2	4.337	1.01094	13	Subunit of the RNA polymerase II mediator complex; associates with core polymerase subunits to form the RNA polymerase II holoenzyme; essential for transcriptional regulation
PRO3	YER023W	S000000825	0.61	1.319	0.756769	10	Delta 1-pyrroline-5-carboxylate reductase, catalyzes the last step in proline biosynthesis
GCD11	YER025W	S000000827	-0.26	3.94	0.655719	30	Gamma subunit of the translation initiation factor eIF2, involved in the identification of the start codon; binds GTP when forming the ternary complex with GTP and tRNAi-Met
CHO1	YER026C	S000000828	-0.44	5.062	0.857317	7	Phosphatidylserine synthase, functions in phospholipid biosynthesis; catalyzes the reaction CDP-diaclyglycerol + L-serine = CMP + L-1-phosphatidylserine, transcriptionally repressed by myo-inositol and choline
GAL83	YER027C	S000000829	2.23	2.564	0.842296	7	One of three possible beta-subunits of the Snf1 kinase complex, allows nuclear localization of the Snf1 kinase complex in the presence of a nonfermentable carbon source; contains glycogen-binding domain
SMB1	YER029C	S000000831	-1.29	3.077	0.73596	6	Core Sm protein Sm B; part of heteroheptameric complex (with Smd1p, Smd2p, Smd3p, Sme1p, Smx3p, and Smx2p) that is part of the spliceosomal U1, U2, U4, and U5 snRNPs; homolog of human Sm B and Sm B'
CHZ1	YER030W	S000000832	-0.45	3.512	0.744323	8	Histone chaperone for Htz1p/H2A-H2B dimer; required for the stabilization of the Chz1p-Htz1-H2B complex; has overlapping function with Nap1p; null mutant displays weak sensitivity to MMS and benomyl; contains a highly conserved CHZ motif
YPT31	YER031C	S000000833	-0.17	1.368	0.782168	15	GTPase of the Ypt/Rab family, very similar to Ypt32p; involved in the exocytic pathway; mediates intra-Golgi traffic or the budding of post-Golgi vesicles from the trans-Golgi
FIR1	YER032W	S000000834	0.67	2.136	0.463069	3	Protein involved in 3' mRNA processing, interacts with Ref2p; potential Cdc28p substrate
ZRG8	YER033C	S000000835	-2.97	2.574	1.05409	7	Protein of unknown function; authentic, non-tagged protein is detected in highly purified mitochondria in high-throughput studies; GFP-fusion protein is localized to the cytoplasm; transcription induced under conditions of zinc deficiency
YER034W	YER034W	S000000836	-0.71	3.328	0.630503	2	Putative protein of unknown function; non-essential gene; expression induced upon calcium shortage
ARB1	YER036C	S000000838	1.34	4.855	1.04402	31	ATPase of the ATP-binding cassette (ABC) family involved in 40S and 60S ribosome biogenesis, has similarity to Gcn20p; shuttles from nucleus to cytoplasm, physically interacts with Tif6p, Lsg1p
PHM8	YER037W	S000000839	-1.77	4.603	0.73217	4	Protein of unknown function, expression is induced by low phosphate levels and by inactivation of Pho85p
HVG1	YER039C	S000000841	0.11	2.84	1.52436	1	Protein of unknown function, has homology to Vrg4p
GLN3	YER040W	S000000842	-0.23	3.696	0.779273	7	Transcriptional activator of genes regulated by nitrogen catabolite repression (NCR), localization and activity regulated by quality of nitrogen source
YEN1	YER041W	S000000843	0.4	3.535	2.8161	3	Protein of unknown function, has similarity to endonuclease Rth1p; potentially phosphorylated by Cdc28p
MXR1	YER042W	S000000844	-0.04	3.082	0.818526	7	Peptide methionine sulfoxide reductase, reverses the oxidation of methionine residues; involved in oxidative damage repair, providing resistance to oxidative stress and regulation of lifespan
SAH1	YER043C	S000000845	0.56	1.814	0.708972	27	S-adenosyl-L-homocysteine hydrolase, catabolizes S-adenosyl-L-homocysteine which is formed after donation of the activated methyl group of S-adenosyl-L-methionine (AdoMet) to an acceptor
ERG28	YER044C	S000000846	0.06	2.479	1.00989	2	Endoplasmic reticulum membrane protein, may facilitate protein-protein interactions between the Erg26p dehydrogenase and the Erg27p 3-ketoreductase and/or tether these enzymes to the ER, also interacts with Erg6p
SPO73	YER046W	S000000848	-0.25	3.432	9.16827	2	Meiosis-specific protein of unknown function, required for spore wall formation during sporulation; dispensible for both nuclear divisions during meiosis
SAP1	YER047C	S000000849	-0.07	2.678	1.62127	6	Putative ATPase of the AAA family, interacts with the Sin1p transcriptional repressor in the two-hybrid system
CAJ1	YER048C	S000000850	1.13	1.589	1.01526	24	Nuclear type II J heat shock protein of the E. coli dnaJ family, contains a leucine zipper-like motif, binds to non-native substrates for presentation to Ssa3p, may function during protein translocation, assembly and disassembly
ISD11	YER048W-A	S000007237	-0.54	1.688	1.09225	8	Protein required for mitochondrial iron-sulfur cluster biosynthesis
TPA1	YER049W	S000000851	0.61	1.326	0.66762	25	Protein of unknown function; interacts with Sup45p (eRF1), Sup35p (eRF3) and Pab1p; has a role in translation termination efficiency, mRNA poly(A) tail length and mRNA stability
RSM18	YER050C	S000000852	-0.13	2.17	0.952176	1	Mitochondrial ribosomal protein of the small subunit, has similarity to E. coli S18 ribosomal protein
HOM3	YER052C	S000000854	-0.04	1.893	0.872	21	Aspartate kinase (L-aspartate 4-P-transferase); cytoplasmic enzyme that catalyzes the first step in the common pathway for methionine and threonine biosynthesis; expression regulated by Gcn4p and the general control of amino acid synthesis
PIC2	YER053C	S000000855	-0.04	2.563	4.50773	10	Mitochondrial phosphate carrier, imports inorganic phosphate into mitochondria; functionally redundant with Mir1p but less abundant than Mir1p under normal conditions; expression is induced at high temperature
GIP2	YER054C	S000000856	-4.02	3.472	1.73436	5	Putative regulatory subunit of the protein phosphatase Glc7p, involved in glycogen metabolism; contains a conserved motif (GVNK motif) that is also found in Gac1p, Pig1p, and Pig2p
HIS1	YER055C	S000000857	-0.07	1.689	0.701663	18	ATP phosphoribosyltransferase, a hexameric enzyme, catalyzes the first step in histidine biosynthesis; mutations cause histidine auxotrophy and sensitivity to Cu, Co, and Ni salts; transcription is regulated by general amino acid control
FCY2	YER056C	S000000858	-2.18	3.062	0.157274	4	Purine-cytosine permease, mediates purine (adenine, guanine, and hypoxanthine) and cytosine accumulation
RPL34A	YER056C-A	S000002135	-0.61	2.329	0.646849	7	Protein component of the large (60S) ribosomal subunit, nearly identical to Rpl34Bp and has similarity to rat L34 ribosomal protein
HMF1	YER057C	S000000859	0.12	2.927	0.920858	7	Member of the p14.5 protein family with similarity to Mmf1p, functionally complements Mmf1p function when targeted to mitochondria; heat shock inducible; high-dosage growth inhibitor; forms a homotrimer in vitro
PET117	YER058W	S000000860	0.23	4.757	0.959198	1	Protein required for assembly of cytochrome c oxidase
PCL6	YER059W	S000000861	0.09	1.13	0.99447	9	Pho85p cyclin of the Pho80p subfamily; forms the major Glc8p kinase together with Pcl7p and Pho85p; involved in the control of glycogen storage by Pho85p; stabilized by Elongin C binding
FCY21	YER060W	S000000862	-1.06	2.907	2.0282	1	Putative purine-cytosine permease, very similar to Fcy2p but cannot substitute for its function
CEM1	YER061C	S000000863	-0.1	4.335	0.779273	9	Mitochondrial beta-keto-acyl synthase with possible role in fatty acid synthesis; required for mitochondrial respiration
HOR2	YER062C	S000000864	-0.57	2.559	1.96003	18	One of two redundant DL-glycerol-3-phosphatases (RHR2/GPP1 encodes the other) involved in glycerol biosynthesis; induced in response to hyperosmotic stress and oxidative stress, and during the diauxic transition
THO1	YER063W	S000000865	0.13	3.73	0.837406	8	Conserved nuclear RNA-binding protein; specifically binds to transcribed chromatin in a THO- and RNA-dependent manner, genetically interacts with shuttling hnRNP NAB2; overproduction suppresses transcriptional defect caused by hpr1 mutation
YER064C	YER064C	S000000866	0.14	3.684	0.526097	2	Non-essential nuclear protein; null mutation has global effects on transcription
YER067W	YER067W	S000000869	-0.05	2.003	1.52615	3	Putative protein of unknown function; green fluorescent protein (GFP)-fusion protein localizes to the cytoplasm and nucleus; YER067W is not an essential gene
MOT2	YER068W	S000000870	0.33	2.874	1.02972	16	Component of the CCR4-NOT complex, which has multiple roles in transcription regulation, mRNA degradation, and post-transcriptional modifications; with Ubc4p, ubiquitylates subunits of the nascent polypeptide-associated complex (NAC)
ARG5	YER069W	S000000871	0.82	1.972	1.00863	27	Protein that is processed in the mitochondrion to yield acetylglutamate kinase and N-acetyl-gamma-glutamyl-phosphate reductase, which catalyze the 2nd and 3rd steps in arginine biosynthesis; enzymes form a complex with Arg2p
RNR1	YER070W	S000000872	-0.3	3.303	0.237122	33	One of two large regulatory subunits of ribonucleotide-diphosphate reductase; the RNR complex catalyzes rate-limiting step in dNTP synthesis, regulated by DNA replication and DNA damage checkpoint pathways via localization of small subunits
YER071C	YER071C	S000000873	0.96	2.365	1.22799	3	Protein of unknown function; green fluorescent protein (GFP)-fusion protein localizes to the cytoplasm in a punctate pattern
ALD5	YER073W	S000000875	-1.63	2.202	0.839848	23	Mitochondrial aldehyde dehydrogenase, involved in regulation or biosynthesis of electron transport chain components and acetate formation; activated by K+; utilizes NADP+ as the preferred coenzyme; constitutively expressed
RPS24A	YER074W	S000000876	-0.13	2.554	0.58976	17	Protein component of the small (40S) ribosomal subunit; identical to Rps24Bp and has similarity to rat S24 ribosomal protein
YOS1	YER074W-A	S000007651	0.78	2.143	0.91475	2	Integral membrane protein required for ER to Golgi transport; localized to the Golgi, the ER, and COPII vesicles; interacts with Yip1p and Yif1p
PTP3	YER075C	S000000877	-0.25	2.139	0.554151	4	Phosphotyrosine-specific protein phosphatase involved in the inactivation of mitogen-activated protein kinase (MAPK) during osmolarity sensing; dephosporylates Hog1p MAPK and regulates its localization; localized to the cytoplasm
YER077C	YER077C	S000000879	0.24	2.401	2.33302	4	Putative protein of unknown function; green fluorescent protein (GFP)-fusion protein localizes to the mitochondrion
YER078C	YER078C	S000000880	0.63	1.613	0.936402	7	Putative mitochondrial metallopeptidase
YER079W	YER079W	S000000881	-0.54	2.853	1.20539	7	Putative protein of unknown function
YER080W	YER080W	S000000882	0.79	4.635	1.18711	24	Putative protein of unknown function; the authentic, non-tagged protein is detected in highly purified mitochondria in high-throughput studies; null mutant displays decreased frequency of mitochondrial genome loss (petite formation)
SER3	YER081W	S000000883	-1.56	2.485	2.3361	14	3-phosphoglycerate dehydrogenase, catalyzes the first step in serine and glycine biosynthesis; isozyme of Ser33p
UTP7	YER082C	S000000884	0.44	3.131	0.572997	14	Nucleolar protein, component of the small subunit (SSU) processome containing the U3 snoRNA that is involved in processing of pre-18S rRNA
GET2	YER083C	S000000885	0.14	3.083	0.921273	4	Subunit of the GET complex; required for meiotic nuclear division and for the retrieval of HDEL proteins from the Golgi to the ER in an ERD2 dependent fashion; may be involved in cell wall function
ILV1	YER086W	S000000888	-1.65	1.411	1.16028	30	Threonine deaminase, catalyzes the first step in isoleucine biosynthesis; expression is under general amino acid control; ILV1 locus exhibits highly positioned nucleosomes whose organization is independent of known ILV1 regulation
SBH1	YER087C-B	S000002128	0.05	2.607	1.24764	2	Beta subunit of the Sec61p ER translocation complex (Sec61p-Sss1p-Sbh1p); involved in protein translocation into the endoplasmic reticulum; interacts with the exocyst complex and also with Rtn1p; homologous to Sbh2p
YER087W	YER087W	S000000889	-0.94	2.535	1.03656	9	Protein with similarity to tRNA synthetases; non-tagged protein is detected in purified mitochondria; null mutant displays decreased frequency of mitochondrial genome loss (petite formation), severe growth defect in minimal glycerol media
DOT6	YER088C	S000000890	1.04	2.485	0.104589	13	Protein of unknown function, involved in telomeric gene silencing and filamentation
PTC2	YER089C	S000000891	0.08	2.217	0.663181	16	Type 2C protein phosphatase; dephosphorylates Hog1p to limit maximal osmostress induced kinase activity; dephosphorylates Ire1p to downregulate the unfolded protein response; dephosphorylates Cdc28p; role in DNA checkpoint inactivation
TRP2	YER090W	S000000892	-0.98	2.793	0.878674	21	Anthranilate synthase, catalyzes the initial step of tryptophan biosynthesis, forms multifunctional hetero-oligomeric anthranilate synthase:indole-3-glycerol phosphate synthase enzyme complex with Trp3p
MET6	YER091C	S000000893	1.33	4.174	0.547223	57	Cobalamin-independent methionine synthase, involved in amino acid biosynthesis; requires a minimum of two glutamates on the methyltetrahydrofolate substrate, similar to bacterial metE homologs
IES5	YER092W	S000000894	1.45	2.137	0.852221	3	Protein that associates with the INO80 chromatin remodeling complex under low-salt conditions
TSC11	YER093C	S000000895	-0.38	2.609	0.955051	6	Subunit of TORC2 (Tor2p-Lst8p-Avo1-Avo2-Tsc11p-Bit61p), a membrane-associated complex that regulates actin cytoskeletal dynamics during polarized growth and cell wall integrity; involved in sphingolipid metabolism; contains a RasGEFN domain
PUP3	YER094C	S000000896	-0.31	3.73	0.934457	6	Beta 3 subunit of the 20S proteasome involved in ubiquitin-dependent catabolism; human homolog is subunit C10
RAD51	YER095W	S000000897	-0.27	1.382	0.591152	9	Strand exchange protein, forms a helical filament with DNA that searches for homology; involved in the recombinational repair of double-strand breaks in DNA during vegetative growth and meiosis; homolog of Dmc1p and bacterial RecA protein
UBP9	YER098W	S000000900	0.19	1.304	1.39255	4	Ubiquitin carboxyl-terminal hydrolase, ubiquitin-specific protease that cleaves ubiquitin-protein fusions
PRS2	YER099C	S000000901	0.15	4.533	1.0638	6	5-phospho-ribosyl-1(alpha)-pyrophosphate synthetase, synthesizes PRPP, which is required for nucleotide, histidine, and tryptophan biosynthesis; one of five related enzymes, which are active as heteromultimeric complexes
UBC6	YER100W	S000000902	0.8	3.713	0.791576	5	Ubiquitin-conjugating enzyme involved in ER-associated protein degradation; located at the cytosolic side of the ER membrane; tail region contains a transmembrane segment at the C-terminus; substrate of the ubiquitin-proteasome pathway
AST2	YER101C	S000000903	-0.25	3.38	0.98265	4	Protein that may have a role in targeting of plasma membrane [H+]ATPase (Pma1p) to the plasma membrane, as suggested by analysis of genetic interactions
SSA4	YER103W	S000000905	-0.35	2.419	8.48668	11	Heat shock protein that is highly induced upon stress; plays a role in SRP-dependent cotranslational protein-membrane targeting and translocation; member of the HSP70 family; cytoplasmic protein that concentrates in nuclei upon starvation
NUP157	YER105C	S000000907	-0.98	2.449	1.24341	28	Abundant subunit of the nuclear pore complex (NPC), present on both sides of the NPC, has similarity to Nup170p
GLE2	YER107C	S000000909	-0.06	3.743	1.03075	13	Component of the nuclear pore complex required for polyadenylated RNA export but not for protein import, homologous to S. pombe Rae1p
KAP123	YER110C	S000000912	-0.07	4.182	0.739822	46	Karyopherin beta, mediates nuclear import of ribosomal proteins prior to assembly into ribosomes and import of histones H3 and H4; localizes to the nuclear pore, nucleus, and cytoplasm; exhibits genetic interactions with RAI1
SWI4	YER111C	S000000913	-0.54	2.383	0.967746	9	DNA binding component of the SBF complex (Swi4p-Swi6p), a transcriptional activator that in concert with MBF (Mbp1-Swi6p) regulates late G1-specific transcription of targets including cyclins and genes required for DNA synthesis and repair
LSM4	YER112W	S000000914	-0.09	4.532	0.763897	7	Lsm (Like Sm) protein; part of heteroheptameric complexes (Lsm2p-7p and either Lsm1p or 8p): cytoplasmic Lsm1p complex involved in mRNA decay; nuclear Lsm8p complex part of U6 snRNP and possibly involved in processing tRNA, snoRNA, and rRNA
TMN3	YER113C	S000000915	0.07	1.158	1.03319	5	Protein with a role in cellular adhesion and filamentous growth; similar to Emp70p and Tmn2p; member of Transmembrane Nine family with 9 transmembrane segments; localizes to Golgi; induced by 8-methoxypsoralen plus UVA irradiation
BOI2	YER114C	S000000916	0.25	4.905	1.01028	14	Protein implicated in polar growth, functionally redundant with Boi1p; interacts with bud-emergence protein Bem1p; contains an SH3 (src homology 3) domain and a PH (pleckstrin homology) domain
SHO1	YER118C	S000000920	0.58	1.947	1.02331	4	Transmembrane osmosensor, participates in activation of both the Cdc42p- and MAP kinase-dependent filamentous growth pathway and the high-osmolarity glycerol response pathway
AVT6	YER119C	S000000921	-0.58	2.216	1.12023	1	Vacuolar amino acid transporter, exports aspartate and glutamate from the vacuole; member of a family of seven S. cerevisiae genes (AVT1-7) related to vesicular GABA-glycine transporters
SCS2	YER120W	S000000922	0.1	4.994	0.716878	13	Integral ER membrane protein that regulates phospholipid metabolism via an interaction with the FFAT motif of Opi1p, also involved in telomeric silencing, disruption causes inositol auxotrophy above 34 degrees C, VAP homolog
GLO3	YER122C	S000000924	-0.99	1.308	0.890014	19	ADP-ribosylation factor GTPase activating protein (ARF GAP), involved in ER-Golgi transport; shares functional similarity with Gcs1p
YCK3	YER123W	S000000925	-0.22	2.178	1.02961	9	Palmitoylated, vacuolar membrane-localized casein kinase I isoform; negatively regulates vacuole fusion during hypertonic stress via phosphorylation of the HOPS complex subunit, Vps41p; shares overlapping essential functions with Hrr25p
RSP5	YER125W	S000000927	0.21	2.254	0.980881	31	Ubiquitin-protein ligase involved in ubiquitin-mediated protein degradation; functions in multivesicular body sorting, heat shock response and ubiquitylation of arrested RNAPII; contains a hect (homologous to E6-AP carboxyl terminus) domain
NSA2	YER126C	S000000928	1.92	2.751	0.381063	5	Protein constituent of 66S pre-ribosomal particles, contributes to processing of the 27S pre-rRNA
LCP5	YER127W	S000000929	0.24	2.542	0.536314	6	Essential protein involved in maturation of 18S rRNA; depletion leads to inhibited pre-rRNA processing and reduced polysome levels; localizes primarily to the nucleolus
YER128W	YER128W	S000000930	-0.1	1.829	0.907456	3	Putative protein of unknown function
SAK1	YER129W	S000000931	-0.26	2.547	1.82956	2	Upstream serine/threonine kinase for the SNF1 complex; partially redundant with Elm1p and Tos3p; members of this family have functional orthology with LKB1, a mammalian kinase associated with Peutz-Jeghers cancer-susceptibility syndrome
YER130C	YER130C	S000000932	-0.92	1.744	1.50901	2	Hypothetical protein
RPS26B	YER131W	S000000933	-0.82	3.231	0.588902	6	Protein component of the small (40S) ribosomal subunit; nearly identical to Rps26Ap and has similarity to rat S26 ribosomal protein
PMD1	YER132C	S000000934	-1.1	2.183	1.60225	7	Protein with an N-terminal kelch-like domain, putative negative regulator of early meiotic gene expression; required, with Mds3p, for growth under alkaline conditions
GLC7	YER133W	S000000935	1.63	3.635	1.04442	14	Catalytic subunit of type 1 serine/threonine protein phosphatase, involved in many processes including glycogen metabolism, sporulation, and mitosis; interacts with multiple regulatory subunits; predominantly isolated with Sds22p
YER134C	YER134C	S000000936	0.05	1.698	1.06869	8	Putative protein of unknown function; non-essential gene
GDI1	YER136W	S000000938	0.03	1.374	1.33321	25	GDP dissociation inhibitor, regulates vesicle traffic in secretory pathways by regulating the dissociation of GDP from the Sec4/Ypt/rab family of GTP binding proteins
RTR1	YER139C	S000000941	0.34	3.191	0.8284	5	Protein with a role in transcription; interacts with Rpo21p; has a cysteine-rich motif required for function and conserved in eukaryotes; shuttles between the nucleus and cytoplasm; RTR1 shows genetic interactions with RPB4, 5, 7, and 9
COX15	YER141W	S000000943	-1.58	2.031	1.32666	6	Protein required for the hydroxylation of heme O to form heme A, which is an essential prosthetic group for cytochrome c oxidase
MAG1	YER142C	S000000944	0.47	3.326	1.31467	4	3-methyl-adenine DNA glycosylase involved in protecting DNA against alkylating agents; initiates base excision repair by removing damaged bases to create abasic sites that are subsequently repaired
DDI1	YER143W	S000000945	1.79	3.643	1.05793	10	DNA damage-inducible v-SNARE binding protein, contains a ubiquitin-associated (UBA) domain, may act as a negative regulator of constitutive exocytosis, may play a role in S-phase checkpoint control
UBP5	YER144C	S000000946	-1.4	4.572	2.72489	6	Putative ubiquitin-specific protease, closest paralog of Doa4p but has no functional overlap; concentrates at the bud neck
FTR1	YER145C	S000000947	0.35	2.389	0.687771	5	High affinity iron permease involved in the transport of iron across the plasma membrane; forms complex with Fet3p; expression is regulated by iron
LSM5	YER146W	S000000948	-0.43	3.11	0.73881	4	Lsm (Like Sm) protein; part of heteroheptameric complexes (Lsm2p-7p and either Lsm1p or 8p): cytoplasmic Lsm1p complex involved in mRNA decay; nuclear Lsm8p complex part of U6 snRNP and possibly involved in processing tRNA, snoRNA, and rRNA
SCC4	YER147C	S000000949	0.14	2.856	1.82311	7	Subunit of cohesin loading factor (Scc2p-Scc4p), a complex required for the loading of cohesin complexes onto chromosomes; involved in establishing sister chromatid cohesion during double-strand break repair via phosphorylated histone H2AX
SPT15	YER148W	S000000950	-0.17	1.487	0.661036	8	TATA-binding protein, general transcription factor that interacts with other factors to form the preinitiation complex at promoters, essential for viability
PEA2	YER149C	S000000951	-3.2	1.189	0.981595	13	Coiled-coil polarisome protein required for polarized morphogenesis, cell fusion, and low affinity Ca2+ influx; forms polarisome complex with Bni1p, Bud6p, and Spa2p; localizes to sites of polarized growth
UBP3	YER151C	S000000953	-1.14	1.623	1.32547	28	Ubiquitin-specific protease that interacts with Bre5p to co-regulate anterograde and retrograde transport between endoplasmic reticulum and Golgi compartments; inhibitor of gene silencing; cleaves ubiquitin fusions but not polyubiquitin
YER152C	YER152C	S000000954	-0.55	4.176	0.943307	12	Putative protein of unknown function; shares amino acid similarity with the aminotransferases Aro8p and Aro9p; YER152C is not an essential gene
OXA1	YER154W	S000000956	0.17	4.855	1.03864	4	Mitochondrial inner membrane insertase, mediates the insertion of both mitochondrial- and nuclear-encoded proteins from the matrix into the inner membrane, interacts with mitochondrial ribosomes; conserved from bacteria to animals
BEM2	YER155C	S000000957	-0.58	1.929	1.24332	55	Rho GTPase activating protein (RhoGAP) involved in the control of cytoskeleton organization and cellular morphogenesis; required for bud emergence
YER156C	YER156C	S000000958	-1.08	2.199	1.00347	15	Putative protein of unknown function; identified as interacting with Hsp82p in a high-throughput two-hybrid screen; green fluorescent protein (GFP)-fusion protein localizes to the cytoplasm and nucleus
COG3	YER157W	S000000959	-0.02	2.698	1.44293	15	Essential component of the conserved oligomeric Golgi complex (Cog1p through Cog8p), a cytosolic tethering complex that functions in protein trafficking to mediate fusion of transport vesicles to Golgi compartments
BUR6	YER159C	S000000961	-2.84	2.191	0.9164	6	Subunit of a heterodimeric NC2 transcription regulator complex with Ncb2p; complex binds to TBP and can repress transcription by preventing preinitiation complex assembly or stimulate activated transcription; homologous to human NC2alpha
SPT2	YER161C	S000000963	1.59	2.034	1.23529	4	Protein involved in negative regulation of transcription; required for RNA polyadenylation; exhibits regulated interactions with both histones and SWI-SNF components, has similarity to mammalian HMG1 proteins
RAD4	YER162C	S000000964	1.12	3.561	2.2287	5	Protein that recognizes and binds damaged DNA (with Rad23p) during nucleotide excision repair; subunit of Nuclear Excision Repair Factor 2 (NEF2); homolog of human XPC protein
YER163C	YER163C	S000000965	2.51	2.623	0.936597	6	Putative protein of unknown function; green fluorescent protein (GFP)-fusion protein localizes to the cytoplasm and nucleus
CHD1	YER164W	S000000966	-0.01	2.281	1.23234	29	Nucleosome remodeling factor that functions in regulation of transcription elongation; contains a chromo domain, a helicase domain and a DNA-binding domain; component of both the SAGA and SLIK complexes
PAB1	YER165W	S000000967	-0.13	3.608	0.834567	35	Poly(A) binding protein, part of the 3'-end RNA-processing complex, mediates interactions between the 5' cap structure and the 3' mRNA poly(A) tail, involved in control of poly(A) tail length, interacts with translation factor eIF-4G
DNF1	YER166W	S000000968	-0.78	2.516	0.892671	21	Aminophospholipid translocase (flippase) that localizes primarily to the plasma membrane; contributes to endocytosis, protein transport and cell polarity; type 4 P-type ATPase
BCK2	YER167W	S000000969	0.92	2.581	2.3235	5	Protein rich in serine and threonine residues involved in protein kinase C signaling pathway, which controls cell integrity; overproduction suppresses pkc1 mutations
CCA1	YER168C	S000000970	-2.43	4.078	1.2758	8	ATP (CTP):tRNA-specific tRNA nucleotidyltransferase; different forms targeted to the nucleus, cytosol, and mitochondrion are generated via the use of multiple transcriptional and translational start sites
RPH1	YER169W	S000000971	0	2.095	1.26243	9	JmjC domain-containing histone demethylase which can specifically demethylate H3K36 tri- and dimethyl modification states; transcriptional repressor of PHR1; Rph1p phosphorylation during DNA damage is under control of the MEC1-RAD53 pathway
RAD3	YER171W	S000000973	-0.97	3.026	1.18748	13	5' to 3' DNA helicase, involved in nucleotide excision repair and transcription; subunit of RNA polymerase II transcription initiation factor TFIIH; subunit of Nucleotide Excision Repair Factor 3 (NEF3); homolog of human XPD protein
BRR2	YER172C	S000000974	-0.42	1.912	1.06443	26	RNA-dependent ATPase RNA helicase (DEIH box); required for disruption of U4/U6 base-pairing in native snRNPs to activate the spliceosome for catalysis; homologous to human U5-200kD
GRX4	YER174C	S000000976	-1.78	2.19	0.876089	6	Hydroperoxide and superoxide-radical responsive glutathione-dependent oxidoreductase; monothiol glutaredoxin subfamily member along with Grx3p and Grx5p; protects cells from oxidative damage
TMT1	YER175C	S000000977	-0.96	3.224	1.59278	6	Trans-aconitate methyltransferase, cytosolic enzyme that catalyzes the methyl esterification of 3-isopropylmalate, an intermediate of the leucine biosynthetic pathway, and trans-aconitate, which inhibits the citric acid cycle
ECM32	YER176W	S000000978	-1.04	3.517	1.39194	19	DNA dependent ATPase/DNA helicase belonging to the Dna2p- and Nam7p-like family of helicases that is involved in modulating translation termination; interacts with the translation termination factors, localized to polysomes
BMH1	YER177W	S000000979	0.11	3.725	1.08448	4	14-3-3 protein, major isoform; controls proteome at post-transcriptional level, binds proteins and DNA, involved in regulation of many processes including exocytosis, vesicle transport, Ras/MAPK signaling, and rapamycin-sensitive signaling
PDA1	YER178W	S000000980	-0.57	1.879	0.850097	31	E1 alpha subunit of the pyruvate dehydrogenase (PDH) complex, catalyzes the direct oxidative decarboxylation of pyruvate to acetyl-CoA; phosphorylated; regulated by glucose
YER182W	YER182W	S000000984	0.31	1.245	1.53602	5	Putative protein of unknown function; the authentic, non-tagged protein is detected in highly purified mitochondria in high-throughput studies
FAU1	YER183C	S000000985	-0.22	1.94	1.12381	4	5,10-methenyltetrahydrofolate synthetase, involved in folic acid biosynthesis
DEG1	YFL001W	S000001895	0.6	4.155	0.917131	6	Non-essential tRNA:pseudouridine synthase, introduces pseudouridines at position 38 or 39 in tRNA, important for maintenance of translation efficiency and normal cell growth, localizes to both the nucleus and cytoplasm
SPB4	YFL002C	S000001894	4.28	3.905	0.811718	14	Putative ATP-dependent RNA helicase, nucleolar protein required for synthesis of 60S ribosomal subunits at a late step in the pathway; sediments with 66S pre-ribosomes in sucrose gradients
VTC2	YFL004W	S000001890	0.33	5.089	1.16629	30	Vacuolar membrane protein involved in vacuolar polyphosphate accumulation; functions as a regulator of vacuolar H+-ATPase activity and vacuolar transporter chaperones; involved in protein localization and non-autophagic vacuolar fusion
SEC4	YFL005W	S000001889	0.25	2.127	1.0674	11	Secretory vesicle-associated Rab GTPase essential for exocytosis; associates with the exocyst component Sec15p and may regulate polarized delivery of transport vesicles to the exocyst at the plasma membrane
BLM10	YFL007W	S000001887	-0.07	1.378	0.81609	44	Proteosome activator subunit; found in association with core particles, with and without the 19S regulatory particle; required for resistance to bleomycin, may be involved in protecting against oxidative damage; similar to mammalian PA200
SMC1	YFL008W	S000001886	-0.66	3.122	1.43587	30	Subunit of the multiprotein cohesin complex, essential protein involved in chromosome segregation and in double-strand DNA break repair; SMC chromosomal ATPase family member, binds DNA with a preference for DNA with secondary structure
CDC4	YFL009W	S000001885	0.4	1.857	0.488574	6	F-box protein required for G1/S and G2/M transition, associates with Skp1p and Cdc53p to form a complex, SCFCdc4, which acts as ubiquitin-protein ligase directing ubiquitination of the phosphorylated CDK inhibitor Sic1p
WWM1	YFL010C	S000001884	-0.62	3.803	0.866757	5	WW domain containing protein of unknown function; binds to Mca1p, a caspase-related protease that regulates H2O2-induced apoptosis; overexpression causes Gi phase growth arrest and clonal death that is suppressed by overexpression of MCA1
IES1	YFL013C	S000001881	-2.05	3.004	1.2683	12	Subunit of the INO80 chromatin remodeling complex
HSP12	YFL014W	S000001880	0.07	1.98	3.10157	9	Plasma membrane localized protein that protects membranes from desiccation; induced by heat shock, oxidative stress, osmostress, stationary phase entry, glucose depletion, oleate and alcohol; regulated by the HOG and Ras-Pka pathways
MDJ1	YFL016C	S000001878	-0.05	2.22	1.34913	12	Co-chaperone that stimulates the ATPase activity of the HSP70 protein Ssc1p; involved in protein folding/refolding in the mitochodrial matrix; required for proteolysis of misfolded proteins; member of the HSP40 (DnaJ) family of chaperones
GNA1	YFL017C	S000001877	-0.02	2.646	0.84443	8	Evolutionarily conserved glucosamine-6-phosphate acetyltransferase required for multiple cell cycle events including passage through START, DNA synthesis, and mitosis; involved in UDP-N-acetylglucosamine synthesis, forms GlcNAc6P from AcCoA
SMX2	YFL017W-A	S000002965	-0.19	1.381	0.655731	2	Core Sm protein Sm G; part of heteroheptameric complex (with Smb1p, Smd1p, Smd2p, Smd3p, Sme1p, and Smx3p) that is part of the spliceosomal U1, U2, U4, and U5 snRNPs; homolog of human Sm G
LPD1	YFL018C	S000001876	-0.58	2	1.17105	23	Dihydrolipoamide dehydrogenase, the lipoamide dehydrogenase component (E3) of the pyruvate dehydrogenase and 2-oxoglutarate dehydrogenase multi-enzyme complexes
GAT1	YFL021W	S000001873	0.76	2.058	1.61027	4	Transcriptional activator of genes involved in nitrogen catabolite repression; contains a GATA-1-type zinc finger DNA-binding motif; activity and localization regulated by nitrogen limitation and Ure2p
FRS2	YFL022C	S000001872	-0.64	1.931	0.814395	27	Alpha subunit of cytoplasmic phenylalanyl-tRNA synthetase, forms a tetramer with Frs1p to form active enzyme; evolutionarily distant from mitochondrial phenylalanyl-tRNA synthetase based on protein sequence, but substrate binding is similar
BUD27	YFL023W	S000001871	0.14	3.189	0.64441	16	Protein involved in bud-site selection, nutrient signaling, and gene expression controlled by TOR kinase; diploid mutants show a random budding pattern rather than the wild-type bipolar pattern; plays a role in regulating Ty1 transposition
EPL1	YFL024C	S000001870	0.21	1.455	0.922199	9	Component of NuA4, which is an essential histone H4/H2A acetyltransferase complex; homologous to Drosophila Enhancer of Polycomb
BST1	YFL025C	S000001869	-0.51	2.537	0.979217	3	GPI inositol deacylase of the ER that negatively regulates COPII vesicle formation, prevents production of vesicles with defective subunits, required for proper discrimination between resident ER proteins and Golgi-bound cargo molecules
STE2	YFL026W	S000001868	-1.53	2.155	0.0349528	9	Receptor for alpha-factor pheromone; seven transmembrane-domain GPCR that interacts with both pheromone and a heterotrimeric G protein to initiate the signaling response that leads to mating between haploid a and alpha cells
CAF16	YFL028C	S000001866	-0.07	1.501	0.925433	11	Part of the evolutionarily-conserved CCR4-NOT transcriptional regulatory complex involved in controlling mRNA initiation, elongation, and degradation; putative ABC ATPase; interacts with Ssn2p, Ssn3p, and Ssn8p
CAK1	YFL029C	S000001865	0.56	1.892	1.92352	8	Cyclin-dependent kinase-activating kinase required for passage through the cell cycle, phosphorylates and activates Cdc28p; nucleotide-binding pocket differs significantly from those of most other protein kinases
AGX1	YFL030W	S000001864	1.08	3.175	4.74859	8	Alanine:glyoxylate aminotransferase (AGT), catalyzes the synthesis of glycine from glyoxylate, which is one of three pathways for glycine biosynthesis in yeast; has similarity to mammalian and plant alanine:glyoxylate aminotransferases
RIM15	YFL033C	S000001861	-1.2	2.849	1.63071	8	Glucose-repressible protein kinase involved in signal transduction during cell proliferation in response to nutrients, specifically the establishment of stationary phase; identified as a regulator of IME2; substrate of Pho80p-Pho85p kinase
RPL22B	YFL034C-A	S000006436	-0.15	1.953	0.616512	4	Protein component of the large (60S) ribosomal subunit, has similarity to Rpl22Ap and to rat L22 ribosomal protein
MOB2	YFL034C-B	S000001859	0.09	3.782	1.21681	5	Component of the RAM signaling network, localizes and activates the Ace2p in the daughter cell nucleus to direct daughter cell-specific transcription of several genes involved in cell separation; Mob1p-like protein
YFL034W	YFL034W	S000001860	-0.11	2.336	0.970029	5	Putative integral membrane protein that interacts with Rpp0p, which is a component of the ribosomal stalk
RPO41	YFL036W	S000001858	-1.78	2.469	0.849626	9	Mitochondrial RNA polymerase; single subunit enzyme similar to those of T3 and T7 bacteriophages; requires a specificity subunit encoded by MTF1 for promoter recognition
TUB2	YFL037W	S000001857	-0.24	2.22	1.09369	21	Beta-tubulin; associates with alpha-tubulin (Tub1p and Tub3p) to form tubulin dimer, which polymerizes to form microtubules
YPT1	YFL038C	S000001856	1.26	1.527	1.08741	11	Ras-like small GTPase, involved in the ER-to-Golgi step of the secretory pathway; complex formation with the Rab escort protein Mrs6p is required for prenylation of Ypt1p by protein geranylgeranyltransferase type II (Bet2p-Bet4p)
ACT1	YFL039C	S000001855	-1.48	4.413	0.987704	26	Actin, structural protein involved in cell polarization, endocytosis, and other cytoskeletal functions
FET5	YFL041W	S000001853	0.04	1.603	0.867719	11	Multicopper oxidase, integral membrane protein with similarity to Fet3p; may have a role in iron transport
YFL042C	YFL042C	S000001852	-1.43	3.595	1.62873	12	Putative protein of unknown function; YFL042C is not an essential gene
OTU1	YFL044C	S000001850	0.77	1.903	1.26173	3	Deubiquitylation enzyme that binds to the chaperone-ATPase Cdc48p; may contribute to regulation of protein degradation by deubiquitylating substrates that have been ubiquitylated by Ufd2p; member of the Ovarian Tumor (OTU) family
SEC53	YFL045C	S000001849	0.19	3.165	1.39658	19	Phosphomannomutase, involved in synthesis of GDP-mannose and dolichol-phosphate-mannose; required for folding and glycosylation of secretory proteins in the ER lumen
RGD2	YFL047W	S000001847	0.19	3.248	0.983894	22	GTPase-activating protein (RhoGAP) for Cdc42p and Rho5p
EMP47	YFL048C	S000001846	-0.7	3.714	0.896298	19	Integral membrane component of endoplasmic reticulum-derived COPII-coated vesicles, which function in ER to Golgi transport
SWP82	YFL049W	S000001845	1.08	2.172	1.38214	7	Member of the SWI/SNF chromatin remodeling complex in which it plays an as yet unidentified role; has identifiable counterparts in closely related yeast species; abundantly expressed in many growth conditions; paralog of Npl6p
ALR2	YFL050C	S000001844	0.42	2.615	0.824762	3	Probable Mg(2+) transporter; overexpression confers increased tolerance to Al(3+) and Ga(3+) ions; plays a role in regulating Ty1 transposition
SNZ3	YFL059W	S000001835	-0.13	2.373	2.12344	6	Member of a stationary phase-induced gene family; transcription of SNZ2 is induced prior to diauxic shift, and also in the absence of thiamin in a Thi2p-dependent manner; forms a coregulated gene pair with SNO3
LOC1	YFR001W	S000001897	0.29	1.73	0.551545	6	Nuclear protein involved in asymmetric localization of ASH1 mRNA; binds double-stranded RNA in vitro; constituent of 66S pre-ribosomal particles
NIC96	YFR002W	S000001898	-0.6	3.744	1.46947	27	Component of the nuclear pore complex, required for nuclear pore formation; forms a subcomplex with Nsp1p, Nup57p, and Nup49p
YPI1	YFR003C	S000001899	-2.15	2.038	1.04167	5	Inhibitor of the type I protein phosphatase Glc7p, which is involved in regulation of a variety of metabolic processes; overproduction causes decreased cellular content of glycogen
RPN11	YFR004W	S000001900	-1.92	2.039	1.09185	14	Metalloprotease subunit of the 19S regulatory particle of the 26S proteasome lid; couples the deubiquitination and degradation of proteasome substrates
SAD1	YFR005C	S000001901	0.4	2.526	1.06629	7	Conserved zinc-finger domain protein involved in pre-mRNA splicing, required for assembly of U4 snRNA into the U4/U6 particle
YFR006W	YFR006W	S000001902	0.91	2.102	1.07276	16	Putative X-Pro aminopeptidase; green fluorescent protein (GFP)-fusion protein localizes to the cytoplasm; YFR006W is not an essential gene
YFH7	YFR007W	S000001903	0.03	1.569	1.26085	9	Putative kinase with similarity to the phosphoribulokinase/uridine kinase/bacterial pantothenate kinase (PRK/URK/PANK) subfamily of P-loop kinases; null mutant displays decreased frequency of mitochondrial genome loss (petite formation)
GCN20	YFR009W	S000001905	-0.33	2.852	1.49133	29	Positive regulator of the Gcn2p kinase activity, forms a complex with Gcn1p; proposed to stimulate Gcn2p activation by an uncharged tRNA
UBP6	YFR010W	S000001906	0.35	2.705	1.47307	28	Ubiquitin-specific protease situated in the base subcomplex of the 26S proteasome, releases free ubiquitin from branched polyubiquitin chains; works in opposition to polyubiquitin elongation activity of Hul5p
YFR011C	YFR011C	S000001907	0.11	3.196	0.806726	7	Putative protein of unknown function; non-tagged protein is detected in highly purified mitochondria; null mutant displays increased frequency of mitochondrial genome loss (petite formation) and reduced growth rate in minimal glycerol media
IOC3	YFR013W	S000001909	3.87	3.916	1.05146	19	Member of a complex (Isw1a) with Isw1p that has nucleosome-stimulated ATPase activity and represses transcription initiation by specific positioning of a promoter proximal dinucleosome; has homology to Esc8p, which is involved in silencing
CMK1	YFR014C	S000001910	-0.16	4.51	1.31928	14	Calmodulin-dependent protein kinase; may play a role in stress response, many CA++/calmodulan dependent phosphorylation substrates demonstrated in vitro, amino acid sequence similar to Cmk2p and mammalian Cam Kinase II
GSY1	YFR015C	S000001911	2.61	4.174	1.08817	23	Glycogen synthase with similarity to Gsy2p, the more highly expressed yeast homolog; expression induced by glucose limitation, nitrogen starvation, environmental stress, and entry into stationary phase
YFR016C	YFR016C	S000001912	-1.14	3.849	1.1195	48	Putative protein of unknown function; green fluorescent protein (GFP)-fusion protein localizes to the cytoplasm and bud; interacts with Spa2p; YFL016C is not an essential gene
YFR017C	YFR017C	S000001913	0.41	5.405	2.49303	3	Putative protein of unknown function; green fluorescent protein (GFP)-fusion protein localizes to the cytoplasm and is induced in response to the DNA-damaging agent MMS; YFR017C is not an essential gene
YFR018C	YFR018C	S000001914	-0.63	3.634	54.0417	3	Putative protein of unknown function
FAB1	YFR019W	S000001915	0.18	2.313	1.58474	14	1-phosphatidylinositol-3-phosphate 5-kinase; vacuolar membrane kinase that generates phosphatidylinositol (3,5)P2, which is involved in vacuolar sorting and homeostasis
ATG18	YFR021W	S000001917	0.05	2.048	1.12027	8	Phosphoinositide binding protein required for vesicle formation in autophagy and the cytoplasm-to-vacuole targeting (Cvt) pathway; binds both phosphatidylinositol (3,5)-bisphosphate and phosphatidylinositol 3-phosphate; WD-40 repeat protein
LSB3	YFR024C-A	S000002968	-2.8	3.721	1.30667	21	Protein containing a C-terminal SH3 domain; binds Las17p, which is a homolog of human Wiskott-Aldrich Syndrome protein involved in actin patch assembly and actin polymerization
HIS2	YFR025C	S000001921	-0.44	1.251	0.879954	7	Histidinolphosphatase, catalyzes the eighth step in histidine biosynthesis; mutations cause histidine auxotrophy and sensitivity to Cu, Co, and Ni salts; transcription is regulated by general amino acid control
YFR026C	YFR026C	S000001922	2.28	3.597	20.6161	3	Putative protein of unknown function
CDC14	YFR028C	S000001924	-3.7	3.638	0.919168	13	Protein phosphatase required for mitotic exit; located in the nucleolus until liberated by the FEAR and Mitotic Exit Network in anaphase, enabling it to act on key substrates to effect a decrease in CDK/B-cyclin activity and mitotic exit
PTR3	YFR029W	S000001925	-1.81	2.862	0.789302	4	Component of the SPS plasma membrane amino acid sensor system (Ssy1p-Ptr3p-Ssy5p), which senses external amino acid concentration and transmits intracellular signals that result in regulation of expression of amino acid permease genes
MET10	YFR030W	S000001926	-0.09	1.791	1.04178	11	Subunit alpha of assimilatory sulfite reductase, which is responsible for the conversion of sulfite into sulfide
SMC2	YFR031C	S000001927	1.4	3.111	1.80525	11	Component of the condensin complex, essential SMC chromosomal ATPase family member that forms a complex with Smc4p to form the active ATPase; Smc2p/Smc4p complex binds DNA, possibly in the cleft formed by the coiled-coil of the folded dimer
RPL2A	YFR031C-A	S000002104	-0.4	1.616	0.614996	20	Protein component of the large (60S) ribosomal subunit, identical to Rpl2Bp and has similarity to E. coli L2 and rat L8 ribosomal proteins
QCR6	YFR033C	S000001929	1.12	3.271	1.07099	2	Subunit 6 of the ubiquinol cytochrome-c reductase complex, which is a component of the mitochondrial inner membrane electron transport chain; highly acidic protein; required for maturation of cytochrome c1
RSC8	YFR037C	S000001933	0.52	1.95	0.970197	26	Component of the RSC chromatin remodeling complex; essential for viability and mitotic growth; homolog of SWI/SNF subunit Swi3p, but unlike Swi3p, does not activate transcription of reporters
IRC5	YFR038W	S000001934	1.08	1.45	0.603698	3	Putative ATPase containing the DEAD/H helicase-related sequence motif; null mutant displays increased levels of spontaneous Rad52p foci
YFR039C	YFR039C	S000001935	1.29	1.914	1.60753	8	Putative protein of unknown function; may be involved in response to high salt and changes in carbon source
SAP155	YFR040W	S000001936	-0.94	4.807	0.939979	19	Protein that forms a complex with the Sit4p protein phosphatase and is required for its function; member of a family of similar proteins including Sap4p, Sap185p, and Sap190p
ERJ5	YFR041C	S000001937	0.21	3.921	2.18503	10	Type I membrane protein with a J domain is required to preserve the folding capacity of the endoplasmic reticulum; loss of the non-essential ERJ5 gene leads to a constitutively induced unfolded protein response
KEG1	YFR042W	S000001938	-1.09	3.37	2.16115	1	Integral membrane protein of the ER; physically interacts with Kre6p; has a role in the synthesis of beta-1,6-glucan in the cell wall; required for cell viability
DUG1	YFR044C	S000001940	0.54	3.717	1.32388	24	Probable di- and tri-peptidase; forms a complex with Dug2p and Dug3p to degrade glutathione (GSH) and other peptides containing a gamma-glu-X bond in an alternative pathway to GSH degradation by gamma-glutamyl transpeptidase (Ecm38p)
YFR045W	YFR045W	S000001941	-0.03	1.265	1.05541	6	Putative mitochondrial transport protein; null mutant is viable, exhibits decreased levels of chitin and normal resistance to calcofluor white
BNA6	YFR047C	S000001943	0.53	2.68	1.23161	8	Quinolinate phosphoribosyl transferase, required for the de novo biosynthesis of NAD from tryptophan via kynurenine; expression regulated by Hst1p
RMD8	YFR048W	S000001944	0.1	4.375	1.39262	6	Cytosolic protein required for sporulation
YMR31	YFR049W	S000001945	-0.69	2.1	1.53076	6	Mitochondrial ribosomal protein of the small subunit, has similarity to human mitochondrial ribosomal protein MRP-S36
PRE4	YFR050C	S000001946	2.3	3.839	1.08418	12	Beta 7 subunit of the 20S proteasome
RET2	YFR051C	S000001947	-2.26	5.056	1.71475	20	Delta subunit of the coatomer complex (COPI), which coats Golgi-derived transport vesicles; involved in retrograde transport between Golgi and ER
RPN12	YFR052W	S000001948	1.16	2.416	1.19897	13	Subunit of the 19S regulatory particle of the 26S proteasome lid; synthetically lethal with RPT1, which is an ATPase component of the 19S regulatory particle; physically interacts with Nob1p and Rpn3p
HXK1	YFR053C	S000001949	-0.33	2.763	1.73327	26	Hexokinase isoenzyme 1, a cytosolic protein that catalyzes phosphorylation of glucose during glucose metabolism; expression is highest during growth on non-glucose carbon sources; glucose-induced repression involves the hexokinase Hxk2p
ERG26	YGL001C	S000002969	0.65	1.323	1.55542	13	C-3 sterol dehydrogenase, catalyzes the second of three steps required to remove two C-4 methyl groups from an intermediate in ergosterol biosynthesis
CDH1	YGL003C	S000002971	0.45	3.72	0.821909	2	Cell-cycle regulated activator of the anaphase-promoting complex/cyclosome (APC/C), which directs ubiquitination of cyclins resulting in mitotic exit; targets the APC/C to specific substrates including CDC20, ASE1, CIN8 and FIN1
RPN14	YGL004C	S000002972	0.15	2.843	0.948388	8	Putative non-ATPase subunit of the 19S regulatory particle of the 26S proteasome; localized to the cytoplasm
COG7	YGL005C	S000002973	-0.08	2.667	0.853492	6	Component of the conserved oligomeric Golgi complex (Cog1p through Cog8p), a cytosolic tethering complex that functions in protein trafficking to mediate fusion of transport vesicles to Golgi compartments
PMC1	YGL006W	S000002974	-0.49	4.666	3.49647	33	Vacuolar Ca2+ ATPase involved in depleting cytosol of Ca2+ ions; prevents growth inhibition by activation of calcineurin in the presence of elevated concentrations of calcium; similar to mammalian PMCA1a
PMA1	YGL008C	S000002976	-0.25	2.56	0.621489	40	Plasma membrane H+-ATPase, pumps protons out of the cell; major regulator of cytoplasmic pH and plasma membrane potential; part of the P2 subgroup of cation-transporting ATPases
LEU1	YGL009C	S000002977	-0.24	1.371	1.1867	37	Isopropylmalate isomerase, catalyzes the second step in the leucine biosynthesis pathway
SCL1	YGL011C	S000002979	-0.19	2.068	1.04178	18	Alpha 1 subunit of the 20S core complex of the 26S proteasome involved in the degradation of ubiquitinated substrates; essential for growth; detected in the mitochondria
ERG4	YGL012W	S000002980	0.3	2.435	1.0237	10	C-24(28) sterol reductase, catalyzes the final step in ergosterol biosynthesis; mutants are viable, but lack ergosterol
PDR1	YGL013C	S000002981	0.33	1.999	0.845807	18	Zinc cluster protein that is a master regulator involved in recruiting other zinc cluster proteins to pleiotropic drug response elements (PDREs) to fine tune the regulation of multidrug resistance genes
PUF4	YGL014W	S000002982	-0.38	2.968	0.890384	17	Member of the PUF protein family, which is defined by the presence of Pumilio homology domains that confer RNA binding activity; preferentially binds mRNAs encoding nucleolar ribosomal RNA-processing factors
KAP122	YGL016W	S000002984	-2.12	4.379	0.932257	18	Karyopherin beta, responsible for import of the Toa1p-Toa2p complex into the nucleus; binds to nucleoporins Nup1p and Nup2p; may play a role in regulation of pleiotropic drug resistance
ATE1	YGL017W	S000002985	0.15	1.253	0.879923	10	Arginyl-tRNA-protein transferase, catalyzes post-translational conjugation of arginine to the amino termini of acceptor proteins which are then subject to degradation via the N-end rule pathway
JAC1	YGL018C	S000002986	-1.65	2.36	1.0527	4	Specialized J-protein that functions with Hsp70 in Fe-S cluster biogenesis in mitochondria, involved in iron metabolism; contains a J domain typical to J-type chaperones; localizes to the mitochondrial matrix
CKB1	YGL019W	S000002987	3.04	2.531	0.829435	7	Beta regulatory subunit of casein kinase 2, a Ser/Thr protein kinase with roles in cell growth and proliferation; the holoenzyme also contains CKA1, CKA2 and CKB2, the many substrates include transcription factors and all RNA polymerases
GET1	YGL020C	S000002988	-0.19	1.846	0.909062	8	Subunit of the GET complex; required for the retrieval of HDEL proteins from the Golgi to the ER in an ERD2 dependent fashion and for normal mitochondrial morphology and inheritance
ALK1	YGL021W	S000002989	-0.66	2.035	0.356754	3	Protein kinase; accumulation and phosphorylation are periodic during the cell cycle; phosphorylated in response to DNA damage; contains characteristic motifs for degradation via the APC pathway; similar to Alk2p and to mammalian haspins
STT3	YGL022W	S000002990	1.3	3.297	0.838452	24	Subunit of the oligosaccharyltransferase complex of the ER lumen, which catalyzes asparagine-linked glycosylation of newly synthesized proteins; forms a subcomplex with Ost3p and Ost4p and is directly involved in catalysis
PIB2	YGL023C	S000002991	-0.04	3.359	0.797041	18	Protein binding phosphatidylinositol 3-phosphate, involved in telomere-proximal repression of gene expression; similar to Fab1 and Vps27
PGD1	YGL025C	S000002993	-0.37	2.073	0.618213	6	Subunit of the RNA polymerase II mediator complex; associates with core polymerase subunits to form the RNA polymerase II holoenzyme; essential for basal and activated transcription; direct target of Cyc8p-Tup1p transcriptional corepressor
TRP5	YGL026C	S000002994	0.63	1.813	1.27147	39	Tryptophan synthase involved in tryptophan biosynthesis, regulated by the general control system of amino acid biosynthesis
CWH41	YGL027C	S000002995	0.25	2.34	0.756232	26	Processing alpha glucosidase I, ER type II integral membrane N-glycoprotein involved in assembly of cell wall beta 1,6 glucan and asparagine-linked protein glycosylation; also involved in ER protein quality control and sensing of ER stress
SCW11	YGL028C	S000002996	-1.85	4.555	1.23465	3	Cell wall protein with similarity to glucanases; may play a role in conjugation during mating based on its regulation by Ste12p
RPL30	YGL030W	S000002998	0.09	2.025	0.633668	14	Protein component of the large (60S) ribosomal subunit, has similarity to rat L30 ribosomal protein; involved in pre-rRNA processing in the nucleolus; autoregulates splicing of its transcript
RPL24A	YGL031C	S000002999	0.07	1.441	0.645304	18	Ribosomal protein L30 of the large (60S) ribosomal subunit, nearly identical to Rpl24Bp and has similarity to rat L24 ribosomal protein; not essential for translation but may be required for normal translation rate
MIG1	YGL035C	S000003003	2.59	4.411	0.493219	9	Transcription factor involved in glucose repression; sequence specific DNA binding protein containing two Cys2His2 zinc finger motifs; regulated by the SNF1 kinase and the GLC7 phosphatase
YGL036W	YGL036W	S000003004	-0.1	1.513	1.38266	8	Putative protein of unknown function; green fluorescent protein (GFP)-fusion protein localizes to the cytoplasm; YGL036W is not an essential gene
PNC1	YGL037C	S000003005	0.15	1.841	2.36772	9	Nicotinamidase that converts nicotinamide to nicotinic acid as part of the NAD(+) salvage pathway, required for life span extension by calorie restriction; PNC1 expression responds to all known stimuli that extend replicative life span
OCH1	YGL038C	S000003006	0.32	4.707	2.07355	17	Mannosyltransferase of the cis-Golgi apparatus, initiates the polymannose outer chain elongation of N-linked oligosaccharides of glycoproteins
YGL039W	YGL039W	S000003007	0.16	1.909	0.654425	13	Oxidoreductase, catalyzes NADPH-dependent reduction of the bicyclic diketone bicyclo[2.2.2]octane-2,6-dione (BCO2,6D) to the chiral ketoalcohol (1R,4S,6S)-6-hydroxybicyclo[2.2.2]octane-2-one (BCO2one6ol)
HEM2	YGL040C	S000003008	-0.55	4.594	0.755158	16	Delta-aminolevulinate dehydratase, a homo-octameric enzyme, catalyzes the conversion of delta-aminolevulinic acid to porphobilinogen, the second step in the heme biosynthetic pathway; localizes to both the cytoplasm and nucleus
YGL041W-A	YGL041W-A	S000028826	-0.87	1.872	1.20255	3	Putative protein of unknown function, conserved in fungi; identified by expression profiling and mass spectrometry
DST1	YGL043W	S000003011	-0.65	3.19	1.105	14	General transcription elongation factor TFIIS, enables RNA polymerase II to read through blocks to elongation by stimulating cleavage of nascent transcripts stalled at transcription arrest sites
RNA15	YGL044C	S000003012	-1.22	4.117	0.875725	4	Cleavage and polyadenylation factor I (CF I) component involved in cleavage and polyadenylation of mRNA 3' ends; interacts with the A-rich polyadenylation signal in complex with Rna14p and Hrp1p
ALG13	YGL047W	S000003015	0.36	2.159	1.14926	3	Catalytic component of UDP-GlcNAc transferase, required for the second step of dolichyl-linked oligosaccharide synthesis; anchored to the ER membrane via interaction with Alg14p; similar to bacterial and human glycosyltransferases
RPT6	YGL048C	S000003016	-0.37	3.543	1.83955	20	One of six ATPases of the 19S regulatory particle of the 26S proteasome involved in the degradation of ubiquitinated substrates; bound by ubiquitin-protein ligases Ubr1p and Ufd4p; localized mainly to the nucleus throughout the cell cycle
TIF4632	YGL049C	S000003017	0.01	1.645	0.913072	26	Translation initiation factor eIF4G, subunit of the mRNA cap-binding protein complex (eIF4F) that also contains eIF4E (Cdc33p); associates with the poly(A)-binding protein Pab1p, also interacts with eIF4A (Tif1p); homologous to Tif4631p
TYW3	YGL050W	S000003018	0.18	1.659	0.807481	11	tRNA methyltransferase required for synthesis of wybutosine, a modified guanosine found at the 3'-position adjacent to the anticodon of phenylalanine tRNA which supports reading frame maintenance by stabilizing codon-anticodon interactions
PRM8	YGL053W	S000003021	-0.18	3.958	5.63064	3	Pheromone-regulated protein with 2 predicted transmembrane segments and an FF sequence, a motif involved in COPII binding; forms a complex with Prp9p in the ER; member of DUP240 gene family
ERV14	YGL054C	S000003022	-0.03	3.645	0.902125	1	Protein localized to COPII-coated vesicles, involved in vesicle formation and incorporation of specific secretory cargo; required for the delivery of bud-site selection protein Axl2p to cell surface; related to Drosophila cornichon
OLE1	YGL055W	S000003023	0.21	1.811	1.00736	12	Delta(9) fatty acid desaturase, required for monounsaturated fatty acid synthesis and for normal distribution of mitochondria
SDS23	YGL056C	S000003024	0.3	3.983	1.40201	12	One of two S. cerevisiae homologs (Sds23p and Sds24p) of the Schizosaccharomyces pombe Sds23 protein, which genetic studies have implicated in APC/cyclosome regulation
YGL057C	YGL057C	S000003025	-0.74	3.008	1.676	4	Putative protein of unknown function; the authentic, non-tagged protein is detected in highly purified mitochondria in high-throughput studies; null mutant exhibits a growth defect on a non-fermentable (respiratory) carbon source
RAD6	YGL058W	S000003026	-0.01	5.029	0.506453	1	Ubiquitin-conjugating enzyme (E2), involved in postreplication repair (with Rad18p), sporulation, telomere silencing, and ubiquitin-mediated N-end rule protein degradation (with Ubr1p)
PKP2	YGL059W	S000003027	0.01	1.986	3.76226	4	Mitochondrial protein kinase that negatively regulates activity of the pyruvate dehydrogenase complex by phosphorylating the ser-133 residue of the Pda1p subunit; acts in concert with kinase Pkp1p and phosphatases Ptc5p and Ptc6p
YBP2	YGL060W	S000003028	-0.41	3.421	1.31035	4	Central kinetochore associated protein that mediates mitotic progression; interacts with several central kinetochore proteins and the centromeric histone Cse4p; role in resistance to oxidative stress; similarity to Ybp1p and Slk19p
DUO1	YGL061C	S000003029	-0.68	1.852	0.665864	7	Essential subunit of the Dam1 complex (aka DASH complex), couples kinetochores to the force produced by MT depolymerization thereby aiding in chromosome segregation; is transferred to the kinetochore prior to mitosis
PYC1	YGL062W	S000003030	-1.6	3.531	1.36722	16	Pyruvate carboxylase isoform, cytoplasmic enzyme that converts pyruvate to oxaloacetate; highly similar to isoform Pyc2p but differentially regulated; mutations in the human homolog are associated with lactic acidosis
MRH4	YGL064C	S000003032	0.24	2.135	1.75546	6	Mitochondrial ATP-dependent RNA helicase of the DEAD-box family, plays an essential role in mitochondrial function
ALG2	YGL065C	S000003033	0.63	1.879	1.73375	12	Mannosyltransferase that catalyzes two consecutive steps in the N-linked glycosylation pathway; alg2 mutants exhibit temperature-sensitive growth and abnormal accumulation of the lipid-linked oligosaccharide Man2GlcNAc2-PP-Dol
SGF73	YGL066W	S000003034	-0.18	3.702	0.888596	11	Subunit of SAGA histone acetyltransferase complex; involved in formation of the preinitiation complex assembly at promoters; null mutant displays defects in premeiotic DNA synthesis
NPY1	YGL067W	S000003035	-1.69	2.542	1.05775	13	NADH diphosphatase (pyrophosphatase), hydrolyzes the pyrophosphate linkage in NADH and related nucleotides; localizes to peroxisomes
MNP1	YGL068W	S000003036	-0.06	2.744	0.989074	8	Protein associated with the mitochondrial nucleoid; putative mitochondrial ribosomal protein with similarity to E. coli L7/L12 ribosomal protein; required for normal respiratory growth
RPB9	YGL070C	S000003038	-0.78	4.149	0.61741	5	RNA polymerase II subunit B12.6; contacts DNA; mutations affect transcription start site; involved in telomere maintenance
AFT1	YGL071W	S000003039	-0.51	3.051	0.603636	4	Transcription factor involved in iron utilization and homeostasis; binds the consensus site PyPuCACCCPu and activates the expression of target genes in response to changes in iron availability
HSF1	YGL073W	S000003041	-1.79	1.575	1.51703	16	Trimeric heat shock transcription factor, activates multiple genes in response to stresses that include hyperthermia; recognizes variable heat shock elements (HSEs) consisting of inverted NGAAN repeats; posttranslationally regulated
RPL7A	YGL076C	S000003044	-1.24	2.318	0.621015	28	Protein component of the large (60S) ribosomal subunit, nearly identical to Rpl7Bp and has similarity to E. coli L30 and rat L7 ribosomal proteins; contains a conserved C-terminal Nucleic acid Binding Domain (NDB2)
HNM1	YGL077C	S000003045	0.18	1.928	0.485385	5	Choline/ethanolamine transporter; involved in the uptake of nitrogen mustard and the uptake of glycine betaine during hypersaline stress; co-regulated with phospholipid biosynthetic genes and negatively regulated by choline and myo-inositol
DBP3	YGL078C	S000003046	-0.03	2.494	0.714794	23	Putative ATP-dependent RNA helicase of the DEAD-box family involved in ribosomal biogenesis
YGL079W	YGL079W	S000003047	0.67	1.749	0.641179	1	Putative protein of unknown function; green fluorescent protein (GFP)-fusion protein localizes to the endosome; identified as a transcriptional activator in a high-throughput yeast one-hybrid assay
YGL080W	YGL080W	S000003048	0.06	2.275	4.28397	2	Putative protein of unknown function; highly conserved across species and orthologous to human gene BRP44L; the authentic, non-tagged protein is detected in highly purified mitochondria in high-throughput studies
YGL082W	YGL082W	S000003050	-0.58	2.009	0.976709	15	Putative protein of unknown function; predicted prenylation/proteolysis target of Afc1p and Rce1p; green fluorescent protein (GFP)-fusion protein localizes to the cytoplasm and nucleus; YGL082W is not an essential gene
SCY1	YGL083W	S000003051	0.81	2.696	0.976573	16	Putative kinase, suppressor of GTPase mutant, similar to bovine rhodopsin kinase
GUP1	YGL084C	S000003052	-0.48	1.668	1.68424	8	Plasma membrane protein involved in remodeling GPI anchors; member of the MBOAT family of putative membrane-bound O-acyltransferases; proposed to be involved in glycerol transport
MAD1	YGL086W	S000003054	0.55	1.965	0.930321	23	Coiled-coil protein involved in the spindle-assembly checkpoint; phosphorylated by Mps1p upon checkpoint activation which leads to inhibition of the activity of the anaphase promoting complex; forms a complex with Mad2p
MMS2	YGL087C	S000003055	0.14	2.587	1.18112	4	Protein involved in error-free postreplication DNA repair; forms a heteromeric complex with Ubc13p that has a ubiquitin-conjugating activity; cooperates with chromatin-associated RING finger proteins, Rad18p and Rad5p
NBP35	YGL091C	S000003059	-1.11	1.931	0.952341	4	Essential iron-sulfur cluster binding protein localized in the cytoplasm; forms a complex with Cfd1p that is involved in iron-sulfur protein assembly in the cytosol; similar to P-loop NTPases
NUP145	YGL092W	S000003060	0.18	2.8	1.09168	32	Essential nucleoporin, catalyzes its own cleavage in vivo to generate a C-terminal fragment that assembles into the Nup84p subcomplex of the nuclear pore complex, and an N-terminal fragment of unknown function that is homologous to Nup100p
SPC105	YGL093W	S000003061	0.09	3.204	0.607013	3	Protein required for accurate chromosome segregation, localizes to the nuclear side of the spindle pole body; forms a complex with Ydr532cp
PAN2	YGL094C	S000003062	0.13	2.442	1.57293	16	Essential subunit of the Pan2p-Pan3p poly(A)-ribonuclease complex, which acts to control poly(A) tail length and regulate the stoichiometry and activity of postreplication repair complexes
VPS45	YGL095C	S000003063	-0.44	3.789	1.50817	9	Protein of the Sec1p/Munc-18 family, essential for vacuolar protein sorting; required for the function of Pep12p and the early endosome/late Golgi SNARE Tlg2p; essential for fusion of Golgi-derived vesicles with the prevacuolar compartment
SRM1	YGL097W	S000003065	-2.08	3.043	0.667667	14	Nucleotide exchange factor for Gsp1p, localizes to the nucleus, required for nucleocytoplasmic trafficking of macromolecules; suppressor of the pheromone response pathway; potentially phosphorylated by Cdc28p
USE1	YGL098W	S000003066	-0.49	1.59	0.726734	3	Essential SNARE protein localized to the ER, involved in retrograde traffic from the Golgi to the ER; forms a complex with the SNAREs Sec22p, Sec20p and Ufe1p
LSG1	YGL099W	S000003067	-0.85	1.759	0.891496	22	Putative GTPase involved in 60S ribosomal subunit biogenesis; required for the release of Nmd3p from 60S subunits in the cytoplasm
SEH1	YGL100W	S000003068	0.56	3.357	1.03215	14	Nuclear pore protein that is part of the evolutionarily conserved Nup84p complex (Nup84p, Nup85p, Nup120p, Nup145p, and Seh1p); homologous to Sec13p
YGL101W	YGL101W	S000003069	2.66	3.025	0.562432	6	Putative protein of unknown function; non-essential gene with similarity to YBR242W; interacts with the DNA helicase Hpr5p
RPL28	YGL103W	S000003071	-0.15	1.651	0.631804	9	Ribosomal protein of the large (60S) ribosomal subunit, has similarity to E. coli L15 and rat L27a ribosomal proteins; may have peptidyl transferase activity; can mutate to cycloheximide resistance
VPS73	YGL104C	S000003072	-0.96	2.97	1.70861	2	Mitochondrial protein; mutation affects vacuolar protein sorting; putative transporter; member of the sugar porter family
ARC1	YGL105W	S000003073	-0.89	1.517	0.91764	22	Protein that binds tRNA and methionyl- and glutamyl-tRNA synthetases (Mes1p and Gus1p), delivering tRNA to them, stimulating catalysis, and ensuring their localization to the cytoplasm; also binds quadruplex nucleic acids
MLC1	YGL106W	S000003074	1.22	1.8	0.70477	14	Essential light chain for Myo1p, light chain for Myo2p; stabilizes Myo2p by binding to the neck region; interacts with Myo1p, Iqg1p, and Myo2p to coordinate formation and contraction of the actomyosin ring with targeted membrane deposition
RMD9	YGL107C	S000003075	0.23	3.469	1.44608	14	Mitochondrial protein required for respiratory growth; mutant phenotype and genetic interactions suggest a role in delivering mt mRNAs to ribosomes; located on matrix face of the inner membrane and loosely associated with mitoribosomes
CUE3	YGL110C	S000003078	1.76	2.116	1.43018	7	Protein of unknown function; has a CUE domain that binds ubiquitin, which may facilitate intramolecular monoubiquitination
NSA1	YGL111W	S000003079	0.04	1.87	0.592916	14	Constituent of 66S pre-ribosomal particles, involved in 60S ribosomal subunit biogenesis
TAF6	YGL112C	S000003080	0.96	2.332	1.08953	15	Subunit (60 kDa) of TFIID and SAGA complexes, involved in transcription initiation of RNA polymerase II and in chromatin modification, similar to histone H4
YGL114W	YGL114W	S000003082	0.37	3.292	1.18698	1	Putative protein of unknown function; predicted member of the oligopeptide transporter (OPT) family of membrane transporters
SNF4	YGL115W	S000003083	-1.76	3.471	0.830125	13	Activating gamma subunit of the AMP-activated Snf1p kinase complex (contains Snf1p and a Sip1p/Sip2p/Gal83p family member); activates glucose-repressed genes, represses glucose-induced genes; role in sporulation, and peroxisome biogenesis
YGL117W	YGL117W	S000003085	-1.08	1.461	2.2935	2	Putative protein of unknown function
ABC1	YGL119W	S000003087	-1.42	3.198	1.34504	6	Protein required for ubiquinone (coenzyme Q) biosynthesis and for respiratory growth; exhibits genetic interaction with COQ9, suggesting a common function; similar to prokaryotic proteins involved in early steps of ubiquinone biosynthesis
PRP43	YGL120C	S000003088	-2.12	2.505	0.952671	25	RNA helicase in the DEAH-box family, functions in both RNA polymerase I and polymerase II transcript metabolism, involved in release of the lariat-intron from the spliceosome
GPG1	YGL121C	S000003089	-1.53	3.377	2.49139	2	Proposed gamma subunit of the heterotrimeric G protein that interacts with the receptor Grp1p; involved in regulation of pseudohyphal growth; requires Gpb1p or Gpb2p to interact with Gpa2p
NAB2	YGL122C	S000003090	0.24	1.013	0.794132	12	Nuclear polyadenylated RNA-binding protein; autoregulates mRNA levels; related to human hnRNPs; has nuclear localization signal sequence that binds to Kap104p; required for poly(A) tail length control and nuclear mRNA export
RPS2	YGL123W	S000003091	-0.01	1.498	0.592259	19	Protein component of the small (40S) subunit, essential for control of translational accuracy; has similarity to E. coli S5 and rat S2 ribosomal proteins
MON1	YGL124C	S000003092	0.17	1.919	1.23362	5	Protein required for fusion of cvt-vesicles and autophagosomes with the vacuole; associates, as a complex with Ccz1p, with a perivacuolar compartment; potential Cdc28p substrate
MET13	YGL125W	S000003093	-1.21	3.3	1.36344	20	Isozyme of methylenetetrahydrofolate reductase, catalyzes the reduction of 5,10-methylenetetrahydrofolate to 5-methyltetrahydrofolate in the methionine biosynthesis pathway
SCS3	YGL126W	S000003094	-0.53	2.679	4.65264	7	Protein required for inositol prototrophy, identified as an ortholog of the FIT family of proteins involved in triglyceride droplet biosynthesis; disputed role in the synthesis of inositol phospholipids from inositol
RSM23	YGL129C	S000003097	-0.03	2.462	1.03656	15	Mitochondrial ribosomal protein of the small subunit, has similarity to mammalian apoptosis mediator proteins; null mutation prevents induction of apoptosis by overproduction of metacaspase Mca1p
CEG1	YGL130W	S000003098	-0.81	2.207	1.20911	12	Alpha (guanylyltransferase) subunit of the mRNA capping enzyme, a heterodimer (the other subunit is CET1, an RNA 5'-triphophatase) involved in adding the 5' cap to mRNA; the mammalian enzyme is a single bifunctional polypeptide
ITC1	YGL133W	S000003101	0.39	3.424	1.20251	26	Component of the ATP-dependent Isw2p-Itc1p chromatin remodeling complex, required for repression of a-specific genes, repression of early meiotic genes during mitotic growth, and repression of INO1
RPL1B	YGL135W	S000003103	3.2	4.566	0.57058	17	N-terminally acetylated protein component of the large (60S) ribosomal subunit, nearly identical to Rpl1Ap and has similarity to E. coli L1 and rat L10a ribosomal proteins; rpl1a rpl1b double null mutation is lethal
SEC27	YGL137W	S000003105	0.61	1.792	1.16518	39	Essential beta'-coat protein of the COPI coatomer, involved in ER-to-Golgi and Golgi-to-ER transport; contains WD40 domains that mediate cargo selective interactions; 45% sequence identity to mammalian beta'-COP
FLC3	YGL139W	S000003107	0.69	3.152	0.615807	8	Putative FAD transporter, similar to Flc1p and Flc2p; localized to the ER
YGL140C	YGL140C	S000003108	-0.76	1.654	1.26523	13	Putative protein of unknown function; non-essential gene; contains multiple predicted transmembrane domains
HUL5	YGL141W	S000003109	0.24	2.252	1.68974	12	Ubiquitin-conjugating enzyme (E4), elongates polyubiquitin chains on substrate proteins; works in opposition to Ubp6p polyubiquitin-shortening activity; required for retrograde transport of misfolded proteins into cytoplasm during ERAD
GPI10	YGL142C	S000003110	1.43	3.015	0.795095	3	Integral membrane protein involved in glycosylphosphatidylinositol (GPI) anchor synthesis; putative alpha 1,2 mannosyltransferase required for addition of the third mannose onto the GPI core structure; human PIG-Bp is a functional homolog
MRF1	YGL143C	S000003111	0.03	2.445	0.697904	1	Mitochondrial translation release factor, involved in stop codon recognition and hydrolysis of the peptidyl-tRNA bond during mitochondrial translation; lack of MRF1 causes mitochondrial genome instability
ROG1	YGL144C	S000003112	-0.84	2.349	1.02052	5	Protein with putative serine active lipase domain
TIP20	YGL145W	S000003113	-0.98	3.638	1.6032	14	Peripheral membrane protein required for fusion of COPI vesicles with the ER, prohibits back-fusion of COPII vesicles with the ER, may act as a sensor for vesicles at the ER membrane; interacts with Sec20p
RPL9A	YGL147C	S000003115	-1.46	2.937	0.640247	10	Protein component of the large (60S) ribosomal subunit, nearly identical to Rpl9Bp and has similarity to E. coli L6 and rat L9 ribosomal proteins
ARO2	YGL148W	S000003116	-0.95	1.787	0.710718	21	Bifunctional chorismate synthase and flavin reductase, catalyzes the conversion of 5-enolpyruvylshikimate 3-phosphate (EPSP) to form chorismate, which is a precursor to aromatic amino acids
INO80	YGL150C	S000003118	-0.87	1.515	1.36174	30	ATPase that forms a large complex, containing actin and several actin-related proteins, that has chromatin remodeling activity and 3' to 5' DNA helicase activity in vitro; shows similarity to the Snf2p family of ATPases
NUT1	YGL151W	S000003119	-0.83	2.659	1.53954	19	Component of the RNA polymerase II mediator complex, which is required for transcriptional activation and also has a role in basal transcription
PEX14	YGL153W	S000003121	0.59	1.559	0.73913	15	Peroxisomal membrane peroxin that is a central component of the peroxisomal protein import machinery; interacts with both PTS1 (Pex5p) and PTS2 (Pex7p), peroxisomal matrix protein signal recognition factors and membrane receptor Pex13p
CDC43	YGL155W	S000003123	-0.05	1.395	0.837929	2	Beta subunit of geranylgeranyltransferase type I, catalyzes geranylgeranylation to the cysteine residue in proteins containing a C-terminal CaaX sequence ending in Leu or Phe; has substrates important for morphogenesis
AMS1	YGL156W	S000003124	0.01	2.552	11.6338	42	Vacuolar alpha mannosidase, involved in free oligosaccharide (fOS) degradation; delivered to the vacuole in a novel pathway separate from the secretory pathway
YGL157W	YGL157W	S000003125	-0.03	2.492	1.76786	17	Oxidoreductase, catalyzes NADPH-dependent reduction of the bicyclic diketone bicyclo[2.2.2]octane-2,6-dione (BCO2,6D) to the chiral ketoalcohol (1R,4S,6S)-6-hydroxybicyclo[2.2.2]octane-2-one (BCO2one6ol)
YGL159W	YGL159W	S000003127	-0.44	3.485	0.861158	10	Putative protein of unknown function; deletion mutant has no detectable phenotype
YGL160W	YGL160W	S000003128	-2.07	3.221	1.29433	7	Putative protein of unknown function; similar to iron/copper reductases (FRE1-8), possibly involved in iron homeostasis; may interact with ribosomes, null mutant displays increased frequency of mitochondrial genome loss (petite formation)
YIP5	YGL161C	S000003129	-0.72	3.184	1.106	4	Protein that interacts with Rab GTPases, localized to late Golgi vesicles; computational analysis of large-scale protein-protein interaction data suggests a possible role in vesicle-mediated transport
YRB30	YGL164C	S000003132	1.01	2.308	1.34798	14	RanGTP-binding protein, inhibits RanGAP1 (Rna1p)-mediated GTP hydrolysis of RanGTP (Gsp1p); shares similarity to proteins in other fungi but not in higher eukaryotes
CUP2	YGL166W	S000003134	-0.96	2.132	1.22459	3	Copper-binding transcription factor; activates transcription of the metallothionein genes CUP1-1 and CUP1-2 in response to elevated copper concentrations
PMR1	YGL167C	S000003135	-0.36	1.075	2.22068	21	High affinity Ca2+/Mn2+ P-type ATPase required for Ca2+ and Mn2+ transport into Golgi; involved in Ca2+ dependent protein sorting and processing; mutations in human homolog ATP2C1 cause acantholytic skin condition Hailey-Hailey disease
SUA5	YGL169W	S000003137	-0.39	1.515	0.826336	8	Protein required for respiratory growth; null mutation suppresses the Cyc1p translation defect caused by the presence of an aberrant ATG codon upstream of the correct start
ROK1	YGL171W	S000003139	1.43	1.346	0.60462	21	ATP-dependent RNA helicase of the DEAD box family; required for 18S rRNA synthesis
NUP49	YGL172W	S000003140	-0.48	1.796	0.876423	7	Subunit of the Nsp1p-Nup57p-Nup49p-Nic96p subcomplex of the nuclear pore complex (NPC), required for nuclear export of ribosomes
KEM1	YGL173C	S000003141	-0.01	2.083	1.08805	54	Evolutionarily-conserved 5'-3' exonuclease component of cytoplasmic processing (P) bodies involved in mRNA decay; plays a role in microtubule-mediated processes, filamentous growth, ribosomal RNA maturation, and telomere maintenance
BUD13	YGL174W	S000003142	0	2.238	0.894157	4	Subunit of the RES complex, which is required for nuclear pre-mRNA retention and splicing; involved in bud-site selection; diploid mutants display a unipolar budding pattern instead of the wild-type bipolar pattern
MPT5	YGL178W	S000003146	-0.09	2.766	3.55574	16	Member of the Puf family of RNA-binding proteins; binds to mRNAs encoding chromatin modifiers and spindle pole body components; involved in longevity, maintenance of cell wall integrity, and sensitivity to and recovery from pheromone arrest
ATG1	YGL180W	S000003148	0.12	3.373	4.89701	10	Protein serine/threonine kinase required for vesicle formation in autophagy and the cytoplasm-to-vacuole targeting (Cvt) pathway; structurally required for pre-autophagosome formation; during autophagy forms a complex with Atg13p and Atg17p
GTS1	YGL181W	S000003149	-0.18	1.793	0.97803	8	Protein that localizes to the nucleus and is involved in transcription regulation; also localizes to actin patches and plays a role in endocytosis; N-terminus contains an ARF-GAP domain and C-terminus contains a Gln-rich domain
STR3	YGL184C	S000003152	-0.58	4.173	3.16916	1	Cystathionine beta-lyase, converts cystathionine into homocysteine
YGL185C	YGL185C	S000003153	-0.22	3.989	1.75163	8	Putative protein with sequence similarity to hydroxyacid dehydrogenases; green fluorescent protein (GFP)-fusion protein localizes to the cytoplasm
COX4	YGL187C	S000003155	0.4	3.259	1.28498	6	Subunit IV of cytochrome c oxidase, which is the terminal member of the mitochondrial inner membrane electron transport chain; N-terminal 25 residues of precursor are cleaved during mitochondrial import; phosphorylated
CDC55	YGL190C	S000003158	-1.25	1.733	0.970719	14	Non-essential regulatory subunit B of protein phosphatase 2A, which has multiple roles in mitosis and protein biosynthesis; involved in regulation of mitotic exit; found in the nucleus of most cells, also at the bud neck and at the bud tip
COX13	YGL191W	S000003159	0.1	2.23	1.59129	3	Subunit VIa of cytochrome c oxidase, which is the terminal member of the mitochondrial inner membrane electron transport chain; not essential for cytochrome c oxidase activity but may modulate activity in response to ATP
HOS2	YGL194C	S000003162	-0.17	1.654	0.91048	4	Histone deacetylase required for gene activation via specific deacetylation of lysines in H3 and H4 histone tails; subunit of the Set3 complex, a meiotic-specific repressor of sporulation specific genes that contains deacetylase activity
GCN1	YGL195W	S000003163	-0.8	1.733	1.40094	104	Positive regulator of the Gcn2p kinase activity, forms a complex with Gcn20p; proposed to stimulate Gcn2p activation by an uncharged tRNA
DSD1	YGL196W	S000003164	-0.17	1.774	1.13926	10	D-serine dehydratase (aka D-serine ammonia-lyase); converts D-serine to pyruvate and ammonia; specifc for D-serine, unlike the bacterial enzyme which recognizes both D-serine and L-serine as substrates
MDS3	YGL197W	S000003165	1.49	3.235	1.31686	21	Protein with an N-terminal kelch-like domain, putative negative regulator of early meiotic gene expression; required, with Pmd1p, for growth under alkaline conditions
YIP4	YGL198W	S000003166	-1	2.139	1.18411	2	Protein that interacts with Rab GTPases, localized to late Golgi vesicles; computational analysis of large-scale protein-protein interaction data suggests a possible role in vesicle-mediated transport
EMP24	YGL200C	S000003168	0.76	1.827	1.41627	6	Integral membrane component of endoplasmic reticulum-derived COPII-coated vesicles, which function in ER to Golgi transport
MCM6	YGL201C	S000003169	-1.05	2.404	0.797441	26	Protein involved in DNA replication; component of the Mcm2-7 hexameric complex that binds chromatin as a part of the pre-replicative complex
ARO8	YGL202W	S000003170	0.19	1.464	0.824505	26	Aromatic aminotransferase I, expression is regulated by general control of amino acid biosynthesis
KEX1	YGL203C	S000003171	-2.24	4.359	0.725979	14	Protease involved in the processing of killer toxin and alpha factor precursor; cleaves Lys and Arg residues from the C-terminus of peptides and proteins
POX1	YGL205W	S000003173	1.48	1.263	0.200399	4	Fatty-acyl coenzyme A oxidase, involved in the fatty acid beta-oxidation pathway; localized to the peroxisomal matrix
CHC1	YGL206C	S000003174	0.7	3.584	1.22095	81	Clathrin heavy chain, subunit of the major coat protein involved in intracellular protein transport and endocytosis; two heavy chains form the clathrin triskelion structural component; the light chain (CLC1) is thought to regulate function
SPT16	YGL207W	S000003175	1.37	2.16	0.955266	48	Subunit of the heterodimeric FACT complex (Spt16p-Pob3p), facilitates RNA Polymerase II transcription elongation through nucleosomes by destabilizing and then reassembling nucleosome structure
SIP2	YGL208W	S000003176	0.37	1.142	0.942915	7	One of three beta subunits of the Snf1 serine/threonine protein kinase complex involved in the response to glucose starvation; null mutants exhibit accelerated aging; N-myristoylprotein localized to the cytoplasm and the plasma membrane
YPT32	YGL210W	S000003178	-0.57	3.034	1.03183	3	GTPase of the Ypt/Rab family, very similar to Ypt31p; involved in the exocytic pathway; mediates intra-Golgi traffic or the budding of post-Golgi vesicles from the trans-Golgi
NCS6	YGL211W	S000003179	-0.14	4.091	0.589883	5	Protein required for thiolation of the uridine at the wobble position of Gln, Lys, and Glu tRNAs; has a role in urmylation and in invasive and pseudohyphal growth; inhibits replication of Brome mosaic virus in S. cerevisiae
VAM7	YGL212W	S000003180	-2.39	1.774	0.787062	6	Component of the vacuole SNARE complex involved in vacuolar morphogenesis; SNAP-25 homolog; functions with a syntaxin homolog Vam3p in vacuolar protein trafficking
SKI8	YGL213C	S000003181	-0.43	3.078	0.751633	5	Protein involved in exosome mediated 3' to 5' mRNA degradation and translation inhibition of non-poly(A) mRNAs as well as double-strand break formation during meiotic recombination; required for repressing propagation of dsRNA viruses
KIP3	YGL216W	S000003184	0.23	3.708	1.42227	9	Kinesin-related motor protein involved in mitotic spindle positioning
MDM34	YGL219C	S000003187	-0.41	3.578	0.389684	2	Mitochondrial outer membrane protein, required for normal mitochondrial morphology and inheritance; localizes to dots on the mitochondrial surface near mtDNA nucleoids; interacts genetically with MDM31 and MDM32
FRA2	YGL220W	S000003188	0.13	1.787	0.706862	3	Protein involved in negative regulation of transcription of iron regulon; forms an iron independent complex with Fra2p, Grx3p, and Grx4p; null mutant fails to repress iron regulon and is sensitive to nickel
NIF3	YGL221C	S000003189	0	1.239	0.916813	14	Protein of unknown function, similar to Listeria monocytogenes major sigma factor (rpoD gene product); the authentic, non-tagged protein is detected in highly purified mitochondria in high-throughput studies
COG1	YGL223C	S000003191	-0.34	1.962	1.13989	5	Essential component of the conserved oligomeric Golgi complex (Cog1p through Cog8p), a cytosolic tethering complex that functions in protein trafficking to mediate fusion of transport vesicles to Golgi compartments
SDT1	YGL224C	S000003192	5.86	4.533	1.39407	9	Pyrimidine nucleotidase; overexpression suppresses the 6-AU sensitivity of transcription elongation factor S-II, as well as resistance to other pyrimidine derivatives
VRG4	YGL225W	S000003193	0.84	2.975	2.31434	2	Golgi GDP-mannose transporter; regulates Golgi function and glycosylation in Golgi
OST5	YGL226C-A	S000003194	1.19	3.896	0.527704	2	Zeta subunit of the oligosaccharyltransferase complex of the ER lumen, which catalyzes asparagine-linked glycosylation of newly synthesized proteins
VID30	YGL227W	S000003196	2.31	2.465	2.29119	17	Protein involved in proteasome-dependent catabolite degradation of fructose-1,6-bisphosphatase (FBPase); shifts the balance of nitrogen metabolism toward the production of glutamate; localized to the nucleus and the cytoplasm
SHE10	YGL228W	S000003197	-0.35	2.608	1.4854	23	Putative glycosylphosphatidylinositol (GPI)-anchored protein of unknown function; overexpression causes growth arrest
SAP4	YGL229C	S000003198	-1.76	2.805	1.96973	2	Protein required for function of the Sit4p protein phosphatase, member of a family of similar proteins that form complexes with Sit4p, including Sap155p, Sap185p, and Sap190p
YGL231C	YGL231C	S000003200	-0.07	1.85	0.85696	7	Putative protein of unknown function; green fluorescent protein (GFP)-fusion protein localizes to the endoplasmic reticulum
TAN1	YGL232W	S000003201	-0.02	2.397	0.761861	16	Putative tRNA acetyltransferase, RNA-binding protein required for the formation of the modified nucleoside N(4)-acetylcytidine in serine and leucine tRNAs but not required for the same modification in 18S rRNA
SEC15	YGL233W	S000003202	1.87	2.945	1.44123	15	Essential 113kDa subunit of the exocyst complex (Sec3p, Sec5p, Sec6p, Sec8p, Sec10p, Sec15p, Exo70p, and Exo84p), which mediates polarized targeting of vesicles to active sites of exocytosis; Sec15p associates with Sec4p and vesicles
ADE5	YGL234W	S000003203	3.32	2.305	0.859518	32	Bifunctional enzyme of the 'de novo' purine nucleotide biosynthetic pathway, contains aminoimidazole ribotide synthetase and glycinamide ribotide synthetase activities
MTO1	YGL236C	S000003205	-1.24	2.038	1.01882	4	Mitochondrial protein, forms a heterodimer complex with Mss1p that performs the 5-carboxymethylaminomethyl modification of the wobble uridine base in mitochondrial tRNAs; required for respiration in paromomycin-resistant 15S rRNA mutants
CSE1	YGL238W	S000003207	0.76	2.731	1.23097	19	Nuclear envelope protein that mediates the nuclear export of importin alpha (Srp1p), homolog of metazoan CAS protein, required for accurate chromosome segregation
DOC1	YGL240W	S000003209	-0.29	1.762	1.26519	2	Processivity factor required for the ubiquitination activity of the anaphase promoting complex (APC), mediates the activity of the APC by contributing to substrate recognition; involved in cyclin proteolysis
KAP114	YGL241W	S000003210	-0.28	2.413	1.17572	16	Karyopherin, responsible for nuclear import of Spt15p, histones H2A and H2B, and Nap1p; amino terminus shows similarity to those of other importins, particularly Cse1p; localization is primarily nuclear
YGL242C	YGL242C	S000003211	-0.58	4.462	0.946484	4	Putative protein of unknown function; deletion mutant is viable
RTF1	YGL244W	S000003213	0.04	1.5	0.847127	12	Subunit of the RNA polymerase II-associated Paf1 complex; directly or indirectly regulates DNA-binding properties of Spt15p and relative activities of different TATA elements; involved in telomere maintenance
GUS1	YGL245W	S000003214	-0.5	1.386	0.930031	50	Glutamyl-tRNA synthetase (GluRS), forms a complex with methionyl-tRNA synthetase (Mes1p) and Arc1p; complex formation increases the catalytic efficiency of both tRNA synthetases and ensures their correct localization to the cytoplasm
RAI1	YGL246C	S000003215	0.55	3.88	0.692843	13	Nuclear protein that binds to and stabilizes the exoribonuclease Rat1p, required for pre-rRNA processing
PDE1	YGL248W	S000003217	-0.17	1.023	1.07289	7	Low-affinity cyclic AMP phosphodiesterase, controls glucose and intracellular acidification-induced cAMP signaling, target of the cAMP-protein kinase A (PKA) pathway; glucose induces transcription and inhibits translation
RTG2	YGL252C	S000003221	-0.45	2.156	1.28886	17	Sensor of mitochondrial dysfunction; regulates the subcellular location of Rtg1p and Rtg3p, transcriptional activators of the retrograde (RTG) and TOR pathways; Rtg2p is inhibited by the phosphorylated form of Mks1p
HXK2	YGL253W	S000003222	-0.36	2.337	0.930417	30	Hexokinase isoenzyme 2 that catalyzes phosphorylation of glucose in the cytosol; predominant hexokinase during growth on glucose; functions in the nucleus to repress expression of HXK1 and GLK1 and to induce expression of its own gene
FZF1	YGL254W	S000003223	0.35	1.604	1.11539	2	Transcription factor involved in sulfite metabolism, sole identified regulatory target is SSU1, overexpression suppresses sulfite-sensitivity of many unrelated mutants due to hyperactivation of SSU1, contains five zinc fingers
ZRT1	YGL255W	S000003224	-0.52	2.213	0.0513818	7	High-affinity zinc transporter of the plasma membrane, responsible for the majority of zinc uptake; transcription is induced under low-zinc conditions by the Zap1p transcription factor
ADH4	YGL256W	S000003225	-0.37	2.421	1.62254	4	Alcohol dehydrogenase isoenzyme type IV, dimeric enzyme demonstrated to be zinc-dependent despite sequence similarity to iron-activated alcohol dehydrogenases; transcription is induced in response to zinc deficiency
MNT2	YGL257C	S000003226	-0.32	2.016	1.07824	2	Mannosyltransferase involved in adding the 4th and 5th mannose residues of O-linked glycans
YGR001C	YGR001C	S000003233	-0.16	1.586	0.980541	10	Putative protein of unknown function with similarity to methyltransferase family members; green fluorescent protein (GFP)-fusion protein localizes to the cytoplasm; required for replication of Brome mosaic virus in S. cerevisiae
SWC4	YGR002C	S000003234	-0.49	2.161	0.900064	8	Component of the Swr1p complex that incorporates Htz1p into chromatin; component of the NuA4 histone acetyltransferase complex
CUL3	YGR003W	S000003235	-0.12	1.623	1.22429	6	Ubiquitin-protein ligase, member of the cullin family with similarity to Cdc53p and human CUL3; required for ubiquitin-dependent degredation of the RNA Polymerase II subunit RPO21
PEX31	YGR004W	S000003236	-1.91	3.807	0.720665	4	Peroxisomal integral membrane protein, involved in negative regulation of peroxisome size; partially functionally redundant with Pex30p and Pex32p; probably acts at a step downstream of steps mediated by Pex28p and Pex29p
TFG2	YGR005C	S000003237	-0.39	2.412	0.850864	9	TFIIF (Transcription Factor II) middle subunit; involved in both transcription initiation and elongation of RNA polymerase II; homologous to human RAP30
PRP18	YGR006W	S000003238	-0.32	1.866	0.950659	5	Splicing factor involved in the positioning of the 3' splice site during the second catalytic step of splicing, part of snRNP U5, interacts with Slu7p
MUQ1	YGR007W	S000003239	0.65	1.754	0.682216	7	Choline phosphate cytidylyltransferase, catalyzes the second step of phosphatidylethanolamine biosynthesis; involved in the maintenance of plasma membrane; similar to mammalian CTP: phosphocholine cytidylyl-transferases
STF2	YGR008C	S000003240	0.13	1.737	7.94667	4	Protein involved in regulation of the mitochondrial F1F0-ATP synthase; Stf1p and Stf2p may act as stabilizing factors that enhance inhibitory action of the Inh1p protein
SEC9	YGR009C	S000003241	-0.5	2.001	0.908023	17	t-SNARE protein important for fusion of secretory vesicles with the plasma membrane; similar to but not functionally redundant with Spo20p; SNAP-25 homolog
NMA2	YGR010W	S000003242	-0.72	5.006	1.19856	7	Nicotinic acid mononucleotide adenylyltransferase, involved in de novo and salvage synthesis of NAD(+)
YGR012W	YGR012W	S000003244	-1.09	2.996	1.05114	12	Putative cysteine synthase, localized to the mitochondrial outer membrane
SNU71	YGR013W	S000003245	0.05	3.291	1.1202	10	Component of U1 snRNP required for mRNA splicing via spliceosome; yeast specific, no metazoan counterpart
MSB2	YGR014W	S000003246	-0.18	3.293	1.76926	2	Mucin family member involved in the Cdc42p- and MAP kinase-dependent filamentous growth signaling pathway; also functions as an osmosensor in parallel to the Sho1p-mediated pathway; potential Cdc28p substrate
YGR017W	YGR017W	S000003249	-0.12	2.983	0.79471	6	Putative protein of unknown function; green fluorescent protein (GFP)-fusion protein localizes to both the nucleus and the cytoplasm
UGA1	YGR019W	S000003251	-0.85	1.344	2.78413	28	Gamma-aminobutyrate (GABA) transaminase (4-aminobutyrate aminotransferase) involved in the 4-aminobutyrate and glutamate degradation pathways; required for normal oxidative stress tolerance and nitrogen utilization
VMA7	YGR020C	S000003252	-0.33	1.985	0.586377	4	Subunit F of the eight-subunit V1 peripheral membrane domain of vacuolar H+-ATPase (V-ATPase), an electrogenic proton pump found throughout the endomembrane system; required for the V1 domain to assemble onto the vacuolar membrane
YGR021W	YGR021W	S000003253	0.01	2.227	0.792207	2	Putative protein of unknown function; the authentic, non-tagged protein is detected in highly purified mitochondria in high-throughput studies
MTL1	YGR023W	S000003255	0.75	2.017	1.35924	3	Protein with both structural and functional similarity to Mid2p, which is a plasma membrane sensor required for cell integrity signaling during pheromone-induced morphogenesis; suppresses rgd1 null mutations
THG1	YGR024C	S000003256	0.17	1.469	1.27491	4	tRNAHis guanylyltransferase, adds a guanosine residue to the 5' end of tRNAHis after transcription and RNase P cleavage; couples nuclear division and migration to cell budding and cytokinesis; essential enzyme conserved among eukaryotes
YGR026W	YGR026W	S000003258	-0.77	2.615	1.42331	6	Putative protein of unknown function; green fluorescent protein (GFP)-fusion protein localizes to the cell periphery
RPS25A	YGR027C	S000003259	0.7	1.695	0.573892	12	Protein component of the small (40S) ribosomal subunit; nearly identical to Rps25Bp and has similarity to rat S25 ribosomal protein
MSP1	YGR028W	S000003260	0.07	2.39	2.83274	10	Mitochondrial protein involved in sorting of proteins in the mitochondria; putative membrane-spanning ATPase
ERV1	YGR029W	S000003261	0.08	1.501	0.902563	7	Flavin-linked sulfhydryl oxidase of the mitochondrial intermembrane space (IMS), oxidizes Mia40p as part of a disulfide relay system that promotes IMS retention of imported proteins; ortholog of human hepatopoietin (ALR)
POP6	YGR030C	S000003262	0.32	1.932	0.717226	5	Subunit of both RNase MRP, which cleaves pre-rRNA, and nuclear RNase P, which cleaves tRNA precursors to generate mature 5' ends
YGR031W	YGR031W	S000003263	0.26	2.671	1.00926	7	Putative protein of unknown function; the authentic, non-tagged protein is detected in highly purified mitochondria in high-throughput studies
GSC2	YGR032W	S000003264	0.12	2.447	1.14844	54	Catalytic subunit of 1,3-beta-glucan synthase, involved in formation of the inner layer of the spore wall; activity positively regulated by Rho1p and negatively by Smk1p; has similarity to an alternate catalytic subunit, Fks1p (Gsc1p)
TIM21	YGR033C	S000003265	0.13	1.627	1.3544	6	Constituent of the mitochondrial inner membrane presequence translocase (TIM23 complex); may regulate protein import by binding to both the translocase of the outer membrane (TOM) and presequence-associated motor (PAM) complexes
RPL26B	YGR034W	S000003266	-0.33	1.667	0.618052	17	Protein component of the large (60S) ribosomal subunit, nearly identical to Rpl26Ap and has similarity to E. coli L24 and rat L26 ribosomal proteins; binds to 5.8S rRNA
CAX4	YGR036C	S000003268	1.66	4.191	1.3633	2	Dolichyl pyrophosphate (Dol-P-P) phosphatase with a luminally oriented active site in the ER, cleaves the anhydride linkage in Dol-P-P, required for Dol-P-P-linked oligosaccharide intermediate synthesis and protein N-glycosylation
ACB1	YGR037C	S000003269	0.73	2.35	1.38713	3	Acyl-CoA-binding protein, transports newly synthesized acyl-CoA esters from fatty acid synthetase (Fas1p-Fas2p) to acyl-CoA-consuming processes
ORM1	YGR038W	S000003270	-0.55	3.21	3.56351	3	Evolutionarily conserved protein with similarity to Orm2p, required for resistance to agents that induce the unfolded protein response; human ortholog is located in the endoplasmic reticulum
KSS1	YGR040W	S000003272	-0.19	2.066	3.05633	3	Mitogen-activated protein kinase (MAPK) involved in signal transduction pathways that control filamentous growth and pheromone response; the KSS1 gene is nonfunctional in S288C strains and functional in W303 strains
BUD9	YGR041W	S000003273	-0.19	1.841	0.596875	1	Protein involved in bud-site selection; diploid mutants display a unipolar budding pattern instead of the wild-type bipolar pattern, and bud at the distal pole
YGR043C	YGR043C	S000003275	-2.19	2.858	17.4493	19	Protein of unknown function; transcription is repressed by Mot1p and induced by alpha-factor and during diauxic shift; null mutant non-quiescent cells exhibit reduced reproductive capacity
RME1	YGR044C	S000003276	0.58	2.989	0.83729	2	Zinc finger protein involved in control of meiosis; prevents meiosis by repressing IME1 expression and promotes mitosis by activating CLN2 expression; directly repressed by a1-a2 regulator; mediates cell type control of sporulation
TAM41	YGR046W	S000003278	0.29	1.438	1.91189	3	Mitochondrial protein involved in protein import into the mitochondrial matrix; maintains the functional integrity of the TIM23 protein translocator complex; viability of null mutant is strain-dependent; mRNA is targeted to the bud
TFC4	YGR047C	S000003279	-1.39	3.818	1.03362	15	One of six subunits of the RNA polymerase III transcription initiation factor complex (TFIIIC); part of the TauA domain of TFIIIC that binds BoxA DNA promoter sites of tRNA and similar genes; has TPR motifs; human homolog is TFIIIC-102
UFD1	YGR048W	S000003280	-2.91	3.532	1.24998	13	Protein that interacts with Cdc48p and Npl4p, involved in recognition of polyubiquitinated proteins and their presentation to the 26S proteasome for degradation; involved in transporting proteins from the ER to the cytosol
SCM4	YGR049W	S000003281	0.39	1.675	0.976776	3	Potential regulatory effector of CDC4 function, suppresses a temperature-sensitive allele of CDC4, tripartite protein structure in which a charged region separates two uncharged domains, not essential for mitosis or meiosis
YGR054W	YGR054W	S000003286	0.73	3.12	0.726533	19	Eukaryotic initiation factor (eIF) 2A; associates specifically with both 40S subunits and 80 S ribosomes, and interacts genetically with both eIF5b and eIF4E; homologous to mammalian eIF2A
MUP1	YGR055W	S000003287	-0.14	2.116	2.13406	6	High affinity methionine permease, integral membrane protein with 13 putative membrane-spanning regions; also involved in cysteine uptake
RSC1	YGR056W	S000003288	0.06	1.756	1.28552	12	Component of the RSC chromatin remodeling complex; required for expression of mid-late sporulation-specific genes; contains two essential bromodomains, a bromo-adjacent homology (BAH) domain, and an AT hook
PEF1	YGR058W	S000003290	-0.49	1.106	0.831046	1	Penta-EF-hand protein required for polar bud growth and cell wall abscission; binds calcium and zinc with different affinity; localizes to bud site in G1, bud neck in G2
ERG25	YGR060W	S000003292	2.55	4.479	0.65581	7	C-4 methyl sterol oxidase, catalyzes the first of three steps required to remove two C-4 methyl groups from an intermediate in ergosterol biosynthesis; mutants accumulate the sterol intermediate 4,4-dimethylzymosterol
ADE6	YGR061C	S000003293	0.96	5.158	0.527521	57	Formylglycinamidine-ribonucleotide (FGAM)-synthetase, catalyzes a step in the 'de novo' purine nucleotide biosynthetic pathway
COX18	YGR062C	S000003294	1.06	3.079	1.68133	3	Mitochondrial integral inner membrane protein required for membrane insertion of C-terminus of Cox2p; interacts genetically and physically with Mss2p and Pnt1p; similar to S. cerevisiae Oxa1, N. crassa Oxa2p, and E. coli YidC
SPT4	YGR063C	S000003295	-0.18	4.162	1.17589	2	Protein that forms a complex with Spt5p and mediates both activation and inhibition of transcription elongation, and plays a role in pre-mRNA processing; in addition, Spt4p is involved in kinetochore function and gene silencing
VHT1	YGR065C	S000003297	1.08	1.712	0.0958053	8	High-affinity plasma membrane H+-biotin (vitamin H) symporter; mutation results in fatty acid auxotrophy; 12 transmembrane domain containing major facilitator subfamily member; mRNA levels negatively regulated by iron deprivation and biotin
YGR068C	YGR068C	S000003300	-0.15	2.255	0.837174	3	Putative protein of unknown function; YGR068C is not an essential gene.
YGR071C	YGR071C	S000003303	0.67	3.932	1.22357	3	Putative protein of unknown function; deletion mutant has increased glycogen accumulation; green fluorescent protein (GFP)-fusion protein localizes to the nucleus
UPF3	YGR072W	S000003304	-0.67	2.522	0.943814	6	Component of the nonsense-mediated mRNA decay (NMD) pathway, along with Nam7p and Nmd2p; involved in decay of mRNA containing nonsense codons; involved in telomere maintenance
SMD1	YGR074W	S000003306	1.01	4.305	0.76985	3	Core Sm protein Sm D1; part of heteroheptameric complex (with Smb1p, Smd2p, Smd3p, Sme1p, Smx3p, and Smx2p) that is part of the spliceosomal U1, U2, U4, and U5 snRNPs; homolog of human Sm D1
PRP38	YGR075C	S000003307	1.14	3.142	0.965066	3	Unique component of the U4/U6.U5 tri-snRNP particle, required for conformational changes which result in the catalytic activation of the spliceosome; dispensible for spliceosome assembly
MRPL25	YGR076C	S000003308	-0.53	1.927	0.702368	4	Mitochondrial ribosomal protein of the large subunit
PEX8	YGR077C	S000003309	1.27	3.129	1.73171	6	Intraperoxisomal organizer of the peroxisomal import machinery, tightly associated with the lumenal face of the peroxisomal membrane, essential for peroxisome biogenesis, binds PTS1-signal receptor Pex5p
PAC10	YGR078C	S000003310	3.3	2.475	0.719392	6	Part of the heteromeric co-chaperone GimC/prefoldin complex, which promotes efficient protein folding
TWF1	YGR080W	S000003312	0.29	4	1.51803	14	Twinfilin, highly conserved actin monomer-sequestering protein involved in regulation of the cortical actin cytoskeleton, composed of two cofilin-like regions, localizes actin monomers to sites of rapid filament assembly
SLX9	YGR081C	S000003313	-1.85	2.752	0.222878	6	Protein required for pre-rRNA processing; associated with the 90S pre-ribosome and 43S small ribosomal subunit precursor; interacts with U3 snoRNA; deletion mutant has synthetic fitness defect with an sgs1 deletion mutant
TOM20	YGR082W	S000003314	-1.6	1.675	0.738464	7	Component of the TOM (translocase of outer membrane) complex responsible for recognition and initial import steps for all mitochondrially directed proteins; acts as a receptor for incoming precursor proteins
GCD2	YGR083C	S000003315	0.42	3.016	0.923318	15	Delta subunit of the translation initiation factor eIF2B, the guanine-nucleotide exchange factor for eIF2; activity subsequently regulated by phosphorylated eIF2; first identified as a negative regulator of GCN4 expression
MRP13	YGR084C	S000003316	0.32	3.901	1.00118	4	Mitochondrial ribosomal protein of the small subunit
RPL11B	YGR085C	S000003317	0.05	3.24	0.639005	12	Protein component of the large (60S) ribosomal subunit, nearly identical to Rpl11Ap; involved in ribosomal assembly; depletion causes degradation of proteins and RNA of the 60S subunit; has similarity to E. coli L5 and rat L11
PIL1	YGR086C	S000003318	-0.49	1.865	0.940891	17	Primary component of eisosomes, which are large immobile cell cortex structures associated with endocytosis; null mutants show activation of Pkc1p/Ypk1p stress resistance pathways; detected in phosphorylated state in mitochondria
PDC6	YGR087C	S000003319	0.06	1.228	0.842618	8	Minor isoform of pyruvate decarboxylase, decarboxylates pyruvate to acetaldehyde, involved in amino acid catabolism; transcription is glucose- and ethanol-dependent, and is strongly induced during sulfur limitation
CTT1	YGR088W	S000003320	-0.14	2.276	5.11594	21	Cytosolic catalase T, has a role in protection from oxidative damage by hydrogen peroxide
NNF2	YGR089W	S000003321	1.22	3.406	1.45181	6	Protein that exhibits physical and genetic interactions with Rpb8p, which is a subunit of RNA polymerases I, II, and III; computational analysis of large-scale protein-protein interaction data suggests a role in chromosome segregation
UTP22	YGR090W	S000003322	1.97	3.805	0.717301	40	Possible U3 snoRNP protein involved in maturation of pre-18S rRNA, based on computational analysis of large-scale protein-protein interaction data
PRP31	YGR091W	S000003323	2.24	3.299	0.985959	2	Splicing factor, component of the U4/U6-U5 snRNP complex
DBF2	YGR092W	S000003324	0.2	2.494	0.761518	4	Ser/Thr kinase involved in transcription and stress response; functions as part of a network of genes in exit from mitosis; localization is cell cycle regulated; activated by Cdc15p during the exit from mitosis
YGR093W	YGR093W	S000003325	0.34	3.526	0.684964	8	Putative debranching enzyme associated ribonuclease; green fluorescent protein (GFP)-fusion protein localizes to the nucleus
VAS1	YGR094W	S000003326	2.29	2.178	0.653722	50	Mitochondrial and cytoplasmic valyl-tRNA synthetase
RRP46	YGR095C	S000003327	-1.45	2.481	0.643093	3	Protein involved in rRNA processing; component of the exosome 3->5 exonuclease complex
ASK10	YGR097W	S000003329	0.05	3.493	1.93553	20	Component of the RNA polymerase II holoenzyme, phosphorylated in response to oxidative stress; has a role in destruction of Ssn8p, which relieves repression of stress-response genes
ESP1	YGR098C	S000003330	-1.46	1.587	1.83732	5	Separase, a caspase-like cysteine protease that promotes sister chromatid separation by mediating dissociation of the cohesin Scc1p from chromatin; inhibits protein phosphatase 2A-Cdc55p to promote mitotic exit; inhibited by Pds1p
TEL2	YGR099W	S000003331	-0.23	1.069	1.33348	3	Essential DNA-binding protein specific to single-stranded yeast telomeric DNA repeats, required for telomere length regulation and telomere position effect
MDR1	YGR100W	S000003332	-0.54	1.589	1.32956	18	Cytoplasmic GTPase-activating protein for Ypt/Rab transport GTPases Ypt6p, Ypt31p and Sec4p; involved in recycling of internalized proteins and regulation of Golgi secretory function
NOP7	YGR103W	S000003335	0.26	2.27	0.607603	22	Nucleolar protein involved in rRNA processing and 60S ribosomal subunit biogenesis; constituent of several different pre-ribosomal particles; required for exit from G<sub>0</sub> and the initiation of cell proliferation
SRB5	YGR104C	S000003336	0.79	2.813	0.848567	6	Subunit of the RNA polymerase II mediator complex; associates with core polymerase subunits to form the RNA polymerase II holoenzyme; essential for transcriptional regulation; involved in telomere maintenance
YGR106C	YGR106C	S000003338	-0.27	1.37	0.606698	2	Putative protein of unknown function; green fluorescent protein (GFP)-fusion protein localizes to the vacuolar memebrane
YGR111W	YGR111W	S000003343	-0.74	1.572	1.42351	18	Putative protein of unknown function; green fluorescent protein (GFP)-fusion protein localizes to both the cytoplasm and the nucleus
SHY1	YGR112W	S000003344	1.68	3.373	0.911712	4	Mitochondrial inner membrane protein required for assembly of cytochrome c oxidase (complex IV); associates with complex IV assembly intermediates and complex III/complex IV supercomplexes; similar to human SURF1 involved in Leigh Syndrome
DAM1	YGR113W	S000003345	-0.26	1.897	0.733668	5	Essential subunit of the Dam1 complex (aka DASH complex), couples kinetochores to the force produced by MT depolymerization thereby aiding in chromosome segregation; Ipl1p target for regulating kinetochore-MT attachments
SPT6	YGR116W	S000003348	-0.57	2.261	1.02243	46	Transcription elongation factor required for the maintenance of chromatin structure during transcription in order to inhibit transcription from promoters within the coding region
YGR117C	YGR117C	S000003349	0.69	2.125	1.77719	11	Putative protein of unknown function; green fluorescent protein (GFP)-fusion protein localizes to the cytoplasm
RPS23A	YGR118W	S000003350	-0.07	1.397	0.618223	13	Ribosomal protein 28 (rp28) of the small (40S) ribosomal subunit, required for translational accuracy; nearly identical to Rps23Bp and similar to E. coli S12 and rat S23 ribosomal proteins; deletion of both RPS23A and RPS23B is lethal
NUP57	YGR119C	S000003351	-0.89	2.957	0.841654	11	Nucleoporin, essential subunit of the nuclear pore complex (NPC), functions as the organizing center of an NPC subcomplex containing Nsp1p, Nup49p, Nup57p, and Nic96p
COG2	YGR120C	S000003352	-3.2	2.567	0.77733	10	Essential component of the conserved oligomeric Golgi complex (Cog1p through Cog8p), a cytosolic tethering complex that functions in protein trafficking to mediate fusion of transport vesicles to Golgi compartments
YGR122W	YGR122W	S000003354	-0.22	2.667	1.65428	5	Putative protein of unknown function; deletion mutants do not properly process Rim101p and have decreased resistance to rapamycin; green fluorescent protein (GFP)-fusion protein localizes to the cytoplasm
PPT1	YGR123C	S000003355	-0.61	3.428	0.742133	16	Protein serine/threonine phosphatase with similarity to human phosphatase PP5; present in both the nucleus and cytoplasm; expressed during logarithmic growth; computational analyses suggest roles in phosphate metabolism and rRNA processing
ASN2	YGR124W	S000003356	-0.11	1.124	0.89145	32	Asparagine synthetase, isozyme of Asn1p; catalyzes the synthesis of L-asparagine from L-aspartate in the asparagine biosynthetic pathway
YGR125W	YGR125W	S000003357	-0.56	3.109	1.62512	16	Putative protein of unknown function; deletion mutant has decreased rapamycin resistance but normal wormannin resistance; green fluorescent protein (GFP)-fusion protein localizes to the vacuole
YGR126W	YGR126W	S000003358	-2.33	3.859	0.775823	5	Putative protein of unknown function; green fluorescent protein (GFP)-fusion protein localizes to both the cytoplasm and the nucleus and is induced in response to the DNA-damaging agent MMS
YGR127W	YGR127W	S000003359	-0.02	2.032	2.72433	9	Putative protein of unknown function; expression is regulated by Msn2p/Msn4p, indicating a possible role in stress response
UTP8	YGR128C	S000003360	0.69	1.975	0.594006	19	Nucleolar protein required for export of tRNAs from the nucleus; also copurifies with the small subunit (SSU) processome containing the U3 snoRNA that is involved in processing of pre-18S rRNA
SYF2	YGR129W	S000003361	-0.02	3.334	0.581903	4	Component of the spliceosome complex involved in pre-mRNA splicing; involved in regulation of cell cycle progression
YGR130C	YGR130C	S000003362	-0.54	3.672	0.765567	23	Putative protein of unknown function; green fluorescent protein (GFP)-fusion protein localizes to the cytoplasm; specifically phosphorylated in vitro by mammalian diphosphoinositol pentakisphosphate (IP7)
PHB1	YGR132C	S000003364	0.94	1.294	1.4007	14	Subunit of the prohibitin complex (Phb1p-Phb2p), a 1.2 MDa ring-shaped inner mitochondrial membrane chaperone that stabilizes newly synthesized proteins; determinant of replicative life span; involved in mitochondrial segregation
PEX4	YGR133W	S000003365	0.17	3.047	1.06955	1	Peroxisomal ubiquitin conjugating enzyme required for peroxisomal matrix protein import and peroxisome biogenesis
CAF130	YGR134W	S000003366	-0.04	3.445	1.22366	9	Part of the evolutionarily-conserved CCR4-NOT transcriptional regulatory complex involved in controlling mRNA initiation, elongation, and degradation
PRE9	YGR135W	S000003367	0.62	2.397	1.0358	12	Alpha 3 subunit of the 20S proteasome, the only nonessential 20S subunit; may be replaced by the alpha 4 subunit (Pre6p) under stress conditions to create a more active proteasomal isoform
LSB1	YGR136W	S000003368	1.25	2.193	0.693924	4	Protein containing an N-terminal SH3 domain; binds Las17p, which is a homolog of human Wiskott-Aldrich Syndrome protein involved in actin patch assembly and actin polymerization
TPO2	YGR138C	S000003370	0.84	3.825	0.292392	2	Polyamine transport protein specific for spermine; localizes to the plasma membrane; transcription of TPO2 is regulated by Haa1p; member of the major facilitator superfamily
CBF2	YGR140W	S000003372	1.1	1.591	0.893661	13	Essential kinetochore protein, component of the CBF3 multisubunit complex that binds to the CDEIII region of the centromere; Cbf2p also binds to the CDEII region possibly forming a different multimeric complex, ubiquitinated in vivo
VPS62	YGR141W	S000003373	0.12	1.633	1.3262	7	Vacuolar protein sorting (VPS) protein required for cytoplasm to vacuole targeting of proteins
SKN1	YGR143W	S000003375	1.45	2.974	0.711458	8	Protein involved in sphingolipid biosynthesis; type II membrane protein with similarity to Kre6p
ENP2	YGR145W	S000003377	0.06	1.675	0.484141	11	Essential nucleolar protein of unknown function; contains WD repeats, interacts with Mpp10p and Bfr2p, and has homology to Spb1p
NAT2	YGR147C	S000003379	1.17	2.201	1.16135	5	Protein with an apparent role in acetylation of N-terminal methionine residues
RPL24B	YGR148C	S000003380	-0.17	2.504	0.662572	2	Ribosomal protein L30 of the large (60S) ribosomal subunit, nearly identical to Rpl24Ap and has similarity to rat L24 ribosomal protein; not essential for translation but may be required for normal translation rate
YGR149W	YGR149W	S000003381	2.76	2.972	2.48397	3	Putative protein of unknown function; predicted to be an integal membrane protein
RSR1	YGR152C	S000003384	2.42	2.695	1.02669	6	GTP-binding protein of the ras superfamily required for bud site selection, morphological changes in response to mating pheromone, and efficient cell fusion; localized to the plasma membrane; significantly similar to mammalian Rap GTPases
CYS4	YGR155W	S000003387	-0.97	2.583	0.647836	33	Cystathionine beta-synthase, catalyzes the synthesis of cystathionine from serine and homocysteine, the first committed step in cysteine biosynthesis
PTI1	YGR156W	S000003388	0.34	4.574	1.16026	5	Pta1p Interacting protein
CHO2	YGR157W	S000003389	-0.82	1.939	1.1902	30	Phosphatidylethanolamine methyltransferase (PEMT), catalyzes the first step in the conversion of phosphatidylethanolamine to phosphatidylcholine during the methylation pathway of phosphatidylcholine biosynthesis
MTR3	YGR158C	S000003390	-0.69	3.247	0.687711	4	3'5' exoribonuclease, exosome subunit; nucleolar protein involved in export of mRNA and ribosomal subunits; homologous to the E. coli exonuclease RNase PH
NSR1	YGR159C	S000003391	-0.01	2.721	0.50874	15	Nucleolar protein that binds nuclear localization sequences, required for pre-rRNA processing and ribosome biogenesis
RTS3	YGR161C	S000003393	1.65	3.368	15.336	6	Putative component of the protein phosphatase type 2A complex
TIF4631	YGR162W	S000003394	0.43	2.597	0.673197	33	Translation initiation factor eIF4G, subunit of the mRNA cap-binding protein complex (eIF4F) that also contains eIF4E (Cdc33p); associates with the poly(A)-binding protein Pab1p, also interacts with eIF4A (Tif1p); homologous to Tif4632p
GTR2	YGR163W	S000003395	-0.38	2.189	1.40678	5	Putative GTP binding protein that negatively regulates Ran/Tc4 GTPase cycle; activates transcription; subunit of EGO and GSE complexes; required for sorting of Gap1p; localizes to cytoplasm and to chromatin; homolog of human RagC and RagD
MRPS35	YGR165W	S000003397	-0.15	3.428	1.19528	12	Mitochondrial ribosomal protein of the small subunit
KRE11	YGR166W	S000003398	-0.09	3.876	1.29298	9	Protein involved in biosynthesis of cell wall beta-glucans; subunit of the TRAPP (transport protein particle) complex, which is involved in the late steps of endoplasmic reticulum to Golgi transport
CLC1	YGR167W	S000003399	-1.26	2.793	1.0873	10	Clathrin light chain, subunit of the major coat protein involved in intracellular protein transport and endocytosis; thought to regulate clathrin function; two Clathrin heavy chains (CHC1) form the clathrin triskelion structural component
YGR169C-A	YGR169C-A	S000028521	0.95	2.079	0.692411	1	Putative protein of unknown function
PSD2	YGR170W	S000003402	-0.94	2.532	1.59008	8	Phosphatidylserine decarboxylase of the Golgi and vacuolar membranes, converts phosphatidylserine to phosphatidylethanolamine
MSM1	YGR171C	S000003403	-0.53	2.092	1.15621	5	Mitochondrial methionyl-tRNA synthetase (MetRS), functions as a monomer in mitochondrial protein synthesis; functions similarly to cytoplasmic MetRS although the cytoplasmic form contains a zinc-binding domain not found in Msm1p
YIP1	YGR172C	S000003404	0.5	1.901	1.09825	1	Integral membrane protein required for the biogenesis of ER-derived COPII transport vesicles; interacts with Yif1p and Yos1p; localizes to the Golgi, the ER, and COPII vesicles
RBG2	YGR173W	S000003405	1.65	4.966	0.788728	13	Protein with similarity to mammalian developmentally regulated GTP-binding protein
CBP4	YGR174C	S000003406	-0.33	2.533	1.51924	3	Mitochondrial protein required for assembly of ubiquinol cytochrome-c reductase complex (cytochrome bc1 complex); interacts with Cbp3p and function is partially redundant with that of Cbp3p
ERG1	YGR175C	S000003407	0.08	3.109	0.728298	20	Squalene epoxidase, catalyzes the epoxidation of squalene to 2,3-oxidosqualene; plays an essential role in the ergosterol-biosynthesis pathway and is the specific target of the antifungal drug terbinafine
ATF2	YGR177C	S000003409	1.8	3.892	0.48083	9	Alcohol acetyltransferase, may play a role in steroid detoxification; forms volatile esters during fermentation, which is important in brewing
PBP1	YGR178C	S000003410	-3.25	3.351	0.886566	21	Protein interacting with poly(A)-binding protein Pab1p; likely involved in controlling the extent of mRNA polyadenylation; forms a complex with Mkt1p that may regulate HO translation; interacts with Lsm12p in a copurification assay
OKP1	YGR179C	S000003411	-0.31	1.73	0.907519	3	Outer kinetochore protein, required for accurate mitotic chromosome segregation; component of the kinetochore sub-complex COMA (Ctf19p, Okp1p, Mcm21p, Ame1p) that functions as a platform for kinetochore assembly
RNR4	YGR180C	S000003412	0.53	2.4	0.982821	25	Ribonucleotide-diphosphate reductase (RNR), small subunit; the RNR complex catalyzes the rate-limiting step in dNTP synthesis and is regulated by DNA replication and DNA damage checkpoint pathways via localization of the small subunits
TIM13	YGR181W	S000003413	-0.73	2.611	0.828056	5	Mitochondrial intermembrane space protein, forms a complex with TIm8p that mediates import and insertion of a subset of polytopic inner membrane proteins; may prevent aggregation of incoming proteins in a chaperone-like manner
UBR1	YGR184C	S000003416	-0.17	1.118	0.83047	41	Ubiquitin-protein ligase (E3) that interacts with Rad6p/Ubc2p to ubiquitinate substrates of the N-end rule pathway; binds to the Rpn2p, Rpt1p, and Rpt6p proteins of the 19S particle of the 26S proteasome
TYS1	YGR185C	S000003417	0.52	2.763	0.741516	26	Cytoplasmic tyrosyl-tRNA synthetase, class I aminoacyl-tRNA synthetase that aminoacylates tRNA(Tyr), required for cytoplasmic protein synthesis, interacts with positions 34 and 35 of the anticodon of tRNATyr
TFG1	YGR186W	S000003418	1.48	2.355	0.780029	15	TFIIF (Transcription Factor II) largest subunit; involved in both transcription initiation and elongation of RNA polymerase II; homologous to human RAP74
HGH1	YGR187C	S000003419	-0.77	4.023	0.710546	13	Nonessential protein of unknown function; green fluorescent protein (GFP)-fusion protein localizes to the cytoplasm; similar to mammalian BRP16 (Brain protein 16)
CRH1	YGR189C	S000003421	-0.69	1.864	5.45678	14	Putative chitin transglycosidase, cell wall protein that functions in the transfer of chitin to beta(1-6)glucan; localizes to sites of polarized growth; expression is induced under cell wall stress conditions
HIP1	YGR191W	S000003423	-2.18	2.613	0.569987	5	High-affinity histidine permease, also involved in the transport of manganese ions
TDH3	YGR192C	S000003424	1.08	2.081	0.931175	48	Glyceraldehyde-3-phosphate dehydrogenase, isozyme 3, involved in glycolysis and gluconeogenesis; tetramer that catalyzes the reaction of glyceraldehyde-3-phosphate to 1,3 bis-phosphoglycerate; detected in the cytoplasm and cell-wall
PDX1	YGR193C	S000003425	-0.23	2.905	1.01836	11	Dihydrolipoamide dehydrogenase (E3)-binding protein (E3BP) of the mitochondrial pyruvate dehydrogenase (PDH) complex, plays a structural role in the complex by binding and positioning E3 to the dihydrolipoamide acetyltransferase (E2) core
XKS1	YGR194C	S000003426	0.2	2.909	1.18107	19	Xylulokinase, converts D-xylulose and ATP to xylulose 5-phosphate and ADP; rate limiting step in fermentation of xylulose; required for xylose fermentation by recombinant S. cerevisiae strains
SKI6	YGR195W	S000003427	0.3	3.02	0.655219	6	3'-to-5' phosphorolytic exoribonuclease that is a subunit of the exosome; required for 3' processing of the 5.8S rRNA; involved in 3' to 5' mRNA degradation and translation inhibition of non-poly(A) mRNAs
FYV8	YGR196C	S000003428	-1.25	4.075	1.01136	11	Protein of unknown function, required for survival upon exposure to K1 killer toxin
SNG1	YGR197C	S000003429	0.27	1.6	1.1	3	Protein involved in nitrosoguanidine (MNNG) resistance; expression is regulated by transcription factors involved in multidrug resistance
YPP1	YGR198W	S000003430	-0.41	4.42	1.09104	15	Cargo-transport protein involved in endocytosis; may interact with ribosomes, based on co-purification experiments; GFP-fusion protein localizes to the cytoplasm; YGR198W is an essential gene
PMT6	YGR199W	S000003431	0.68	2.829	0.946123	8	Protein O-mannosyltransferase, transfers mannose from dolichyl phosphate-D-mannose to protein serine/threonine residues of secretory proteins; reaction is essential for cell wall rigidity; member of a family of mannosyltransferases
ELP2	YGR200C	S000003432	0.57	2.345	0.606635	27	Subunit of Elongator complex, which is required for modification of wobble nucleosides in tRNA; target of Kluyveromyces lactis zymocin
YGR201C	YGR201C	S000003433	0.15	1.907	42.7425	3	Putative protein of unknown function
PCT1	YGR202C	S000003434	1.38	3.981	0.756363	8	Cholinephosphate cytidylyltransferase, also known as CTP:phosphocholine cytidylyltransferase, rate-determining enzyme of the CDP-choline pathway for phosphatidylcholine synthesis, inhibited by Sec14p, activated upon lipid-binding
YGR203W	YGR203W	S000003435	-0.69	1.687	0.923574	8	Putative protein with sequence similarity to protein tyrosine phosphatases of the CDC25-like phosphatase family; green fluorescent protein (GFP)-fusion protein localizes to both the cytoplasm and the nucleus
ADE3	YGR204W	S000003436	-0.55	1.705	0.844986	36	Cytoplasmic trifunctional enzyme C1-tetrahydrofolate synthase, involved in single carbon metabolism and required for biosynthesis of purines, thymidylate, methionine, and histidine
YGR205W	YGR205W	S000003437	0	1.41	0.752519	9	ATP-binding protein of unknown function; crystal structure resembles that of E.coli pantothenate kinase and other small kinases
YGR207C	YGR207C	S000003439	-0.06	1.53	0.959763	10	Protein that interacts with frataxin (Yfh1p); putative homolog of mammalian electron transfer flavoprotein complex subunit ETF-beta; authentic, non-tagged protein is detected in highly purified mitochondria in high-throughput studies
SER2	YGR208W	S000003440	0.13	2.027	0.986489	6	Phosphoserine phosphatase of the phosphoglycerate pathway, involved in serine and glycine biosynthesis, expression is regulated by the available nitrogen source
TRX2	YGR209C	S000003441	-0.8	1.961	1.22863	8	Cytoplasmic thioredoxin isoenzyme of the thioredoxin system which protects cells against oxidative and reductive stress, forms LMA1 complex with Pbi2p, acts as a cofactor for Tsa1p, required for ER-Golgi transport and vacuole inheritance
YGR210C	YGR210C	S000003442	-0.28	1.087	0.869284	11	Putative protein of unknown function; green fluorescent protein (GFP)-fusion protein localizes to the cytoplasm
ZPR1	YGR211W	S000003443	0.06	2.127	0.656015	15	Essential protein with two zinc fingers, present in the nucleus of growing cells but relocates to the cytoplasm in starved cells via a process mediated by Cpr1p; binds to translation elongation factor eEF-1 (Tef1p)
SLI1	YGR212W	S000003444	2.64	3.554	0.995712	6	N-acetyltransferase, confers resistance to the sphingolipid biosynthesis inhibitor myriocin (ISP-1) by converting it into N-acetyl-myriocin, co-operates with Ypk1p in mediating resistance to myriocin
RPS0A	YGR214W	S000003446	-0.19	2.452	0.537468	12	Protein component of the small (40S) ribosomal subunit, nearly identical to Rps0Bp; required for maturation of 18S rRNA along with Rps0Bp; deletion of either RPS0 gene reduces growth rate, deletion of both genes is lethal
GPI1	YGR216C	S000003448	-0.47	4.188	2.40044	1	Membrane protein involved in the synthesis of N-acetylglucosaminyl phosphatidylinositol (GlcNAc-PI), the first intermediate in the synthesis of glycosylphosphatidylinositol (GPI) anchors; human and mouse GPI1p are functional homologs
CCH1	YGR217W	S000003449	2.88	1.915	1.10995	7	Voltage-gated high-affinity calcium channel involved in calcium influx in response to some environmental stresses as well as exposure to mating pheromones; interacts and co-localizes with Mid1p, suggesting Cch1p and Mid1p function together
CRM1	YGR218W	S000003450	-1.75	5.129	1.52975	41	Major karyopherin, involved in export of proteins, RNAs, and ribosomal subunits from the nucleus
MRPL9	YGR220C	S000003452	-0.43	1.699	1.04111	4	Mitochondrial ribosomal protein of the large subunit
PET54	YGR222W	S000003454	-0.43	3.78	2.04245	10	Mitochondrial inner membrane protein that binds to the 5' UTR of the COX3 mRNA to activate its translation together with Pet122p and Pet494p; also binds to the COX1 Group I intron AI5 beta to facilitate exon ligation during splicing
HSV2	YGR223C	S000003455	0.83	2.262	1.06385	6	Phosphatidylinositol 3,5-bisphosphate-binding protein, predicted to fold as a seven-bladed beta-propeller; displays punctate cytoplasmic localization
DIE2	YGR227W	S000003459	0.96	1.713	0.890523	2	Dolichyl-phosphoglucose-dependent alpha-1,2 glucosyltransferase of the ER, functions in the pathway that synthesizes the dolichol-linked oligosaccharide precursor for N-linked protein glycosylation, has a role in regulation of ITR1 and INO1
SMI1	YGR229C	S000003461	0.5	3.488	0.707548	16	Protein involved in the regulation of cell wall synthesis; proposed to be involved in coordinating cell cycle progression with cell wall integrity
PHB2	YGR231C	S000003463	0.62	2.95	1.54483	12	Subunit of the prohibitin complex (Phb1p-Phb2p), a 1.2 MDa ring-shaped inner mitochondrial membrane chaperone that stabilizes newly synthesized proteins; determinant of replicative life span; involved in mitochondrial segregation
NAS6	YGR232W	S000003464	0.63	1.526	1.02612	12	Regulatory, non-ATPase subunit of the 26S proteasome; homolog of the human oncoprotein gankyrin, which interacts with the retinoblastoma tumor suppressor (Rb) and cyclin-dependent kinase 4/6
PHO81	YGR233C	S000003465	0.04	4.075	1.77313	13	Cyclin-dependent kinase (CDK) inhibitor, regulates Pho80p-Pho85p and Pcl7p-Pho85p cyclin-CDK complexes in response to phosphate levels; inhibitory activity for Pho80p-Pho85p requires myo-D-inositol heptakisphosphate (IP7) generated by Vip1p
YHB1	YGR234W	S000003466	0.36	1.128	0.382704	12	Nitric oxide oxidoreductase, flavohemoglobin involved in nitric oxide detoxification; plays a role in the oxidative and nitrosative stress responses
YGR235C	YGR235C	S000003467	0.05	2.471	0.90576	3	Putative protein of unknown function; the authentic, non-tagged protein is detected in highly purified mitochondria in high-throughput studies
YGR237C	YGR237C	S000003469	-0.44	3.224	1.55283	14	Putative protein of unknown function; green fluorescent protein (GFP)-fusion protein localizes to the cytoplasm
KEL2	YGR238C	S000003470	-1.14	5.102	0.733414	9	Protein that functions in a complex with Kel1p to negatively regulate mitotic exit, interacts with Tem1p and Lte1p; localizes to regions of polarized growth; potential Cdc28p substrate
PFK1	YGR240C	S000003472	-0.22	3.038	0.973447	50	Alpha subunit of heterooctameric phosphofructokinase involved in glycolysis, indispensable for anaerobic growth, activated by fructose-2,6-bisphosphate and AMP, mutation inhibits glucose induction of cell cycle-related genes
YAP1802	YGR241C	S000003473	0.35	1.933	2.69363	2	Protein involved in clathrin cage assembly; binds Pan1p and clathrin; homologous to Yap1801p, member of the AP180 protein family
YGR243W	YGR243W	S000003475	-0.2	2.972	12.8581	2	Putative protein of unknown function; the authentic, non-tagged protein is detected in highly purified mitochondria in high-throughput studies
LSC2	YGR244C	S000003476	-0.17	1.313	2.65498	21	Beta subunit of succinyl-CoA ligase, which is a mitochondrial enzyme of the TCA cycle that catalyzes the nucleotide-dependent conversion of succinyl-CoA to succinate
SDA1	YGR245C	S000003477	-1.57	2.963	0.383567	12	Highly conserved nuclear protein required for actin cytoskeleton organization and passage through Start, plays a critical role in G1 events, binds Nap1p, also involved in 60S ribosome biogenesis
BRF1	YGR246C	S000003478	-1.09	2.462	0.492604	7	TFIIIB B-related factor, one of three subunits of RNA polymerase III transcription initiation factor TFIIIB, binds TFIIIC and TBP and recruits RNA pol III to promoters, amino-terminal half is homologous to TFIIB
CPD1	YGR247W	S000003479	1.49	4.036	0.921305	4	Cyclic nucleotide phosphodiesterase, hydrolyzes ADP-ribose 1'', 2''-cyclic phosphate to ADP-ribose 1''-phosphate; may have a role in tRNA splicing; no detectable phenotype is conferred by null mutation or by overexpression
SOL4	YGR248W	S000003480	-0.56	2.353	2.18472	10	6-phosphogluconolactonase with similarity to Sol3p
MGA1	YGR249W	S000003481	0.6	1.761	2.06709	1	Protein similar to heat shock transcription factor; multicopy suppressor of pseudohyphal growth defects of ammonium permease mutants
YGR250C	YGR250C	S000003482	1.77	3.51	2.00743	26	Putative protein of unknown function; green fluorescent protein (GFP)-fusion protein localizes to the cytoplasm
YGR251W	YGR251W	S000003483	-3.15	4.011	0.360307	3	Putative protein of unknown function; deletion mutant has defects in pre-rRNA processing; green fluorescent protein (GFP)-fusion protein localizes to both the nucleus and the nucleolus; YGR251W is an essential gene
GCN5	YGR252W	S000003484	-0.81	4.542	1.06496	7	Histone acetyltransferase, acetylates N-terminal lysines on histones H2B and H3; catalytic subunit of the ADA and SAGA histone acetyltransferase complexes; founding member of the Gcn5p-related N-acetyltransferase superfamily
PUP2	YGR253C	S000003485	-0.41	1.361	1.016	13	Alpha 5 subunit of the 20S proteasome involved in ubiquitin-dependent catabolism; human homolog is subunit zeta
ENO1	YGR254W	S000003486	0.25	3.496	1.26304	41	Enolase I, a phosphopyruvate hydratase that catalyzes the conversion of 2-phosphoglycerate to phosphoenolpyruvate during glycolysis and the reverse reaction during gluconeogenesis; expression is repressed in response to glucose
COQ6	YGR255C	S000003487	0.37	2.857	1.89428	12	Putative flavin-dependent monooxygenase, involved in ubiquinone (Coenzyme Q) biosynthesis; localizes to the matrix face of the mitochondrial inner membrane in a large complex with other ubiquinone biosynthetic enzymes
GND2	YGR256W	S000003488	-1.28	4.188	5.54236	32	6-phosphogluconate dehydrogenase (decarboxylating), catalyzes an NADPH regenerating reaction in the pentose phosphate pathway; required for growth on D-glucono-delta-lactone
RAD2	YGR258C	S000003490	1.19	2.838	1.86963	10	Single-stranded DNA endonuclease, cleaves single-stranded DNA during nucleotide excision repair to excise damaged DNA; subunit of Nucleotide Excision Repair Factor 3 (NEF3); homolog of human XPG protein
TNA1	YGR260W	S000003492	0.58	3.969	0.223919	5	High affinity nicotinic acid plasma membrane permease, responsible for uptake of low levels of nicotinic acid; expression of the gene increases in the absence of extracellular nicotinic acid or para-aminobenzoate (PABA)
APL6	YGR261C	S000003493	0.8	1.358	1.18875	28	Beta3-like subunit of the yeast AP-3 complex; functions in transport of alkaline phosphatase to the vacuole via the alternate pathway; exists in both cytosolic and peripherally associated membrane-bound pools
BUD32	YGR262C	S000003494	0.08	4.835	1.02449	4	Protein kinase proposed to be involved in bud-site selection, telomere uncapping and elongation, and transcription; component of the EKC/KEOPS protein complex with Kae1p, Cgi121p, Pcc1p, and Gon7p
SAY1	YGR263C	S000003495	1.42	2.282	1.63376	6	Sterol deacetylase; component of the sterol acetylation/deacetylation cycle along with Atf2p; integral membrane protein with active site in the ER lumen; green fluorescent protein (GFP)-fusion protein localizes to the endoplasmic reticulum
MES1	YGR264C	S000003496	-0.8	3.684	0.64432	48	Methionyl-tRNA synthetase, forms a complex with glutamyl-tRNA synthetase (Gus1p) and Arc1p, which increases the catalytic efficiency of both tRNA synthetases; also has a role in nuclear export of tRNAs
YGR266W	YGR266W	S000003498	-0.92	3.092	0.796033	21	Protein of unknown function, predicted to contain a single transmembrane domain; localized to both the mitochondrial outer membrane and the plasma membrane
FOL2	YGR267C	S000003499	-0.44	1.757	0.664711	11	GTP-cyclohydrolase I, catalyzes the first step in the folic acid biosynthetic pathway
YTA7	YGR270W	S000003502	0.84	2.17	1.55498	27	Protein that localizes to chromatin and has a role in regulation of histone gene expression; has a bromodomain-like region that interacts with the N-terminal tail of histone H3, and an ATPase domain; potentially phosphorylated by Cdc28p
EFG1	YGR271C-A	S000007608	-0.68	2.46	0.504736	5	Protein of unknown function; null mutant is sensitive to hydroxyurea and is delayed in recovering from alpha-factor arrest; green fluorescent protein (GFP)-fusion protein localizes to the nucleolus
SLH1	YGR271W	S000003503	-0.8	1.975	1.75443	23	Putative RNA helicase related to Ski2p, involved in translation inhibition of non-poly(A) mRNAs; required for repressing propagation of dsRNA viruses
TAF1	YGR274C	S000003506	0.61	2.397	1.23225	14	TFIID subunit (145 kDa), involved in RNA polymerase II transcription initiation, has histone acetyltransferase activity, involved in promoter binding and G1/S progression
RTT102	YGR275W	S000003507	-0.91	1.914	0.7252	4	Component of both the SWI/SNF and RSC chromatin remodeling complexes, suggested role in chromosome maintenance; possible weak regulator of Ty1 transposition
RNH70	YGR276C	S000003508	2.23	1.92	1.05753	11	3' exoribonuclease, required for 5S rRNA and tRNA-Arg3 maturation
YGR277C	YGR277C	S000003509	0.8	2.068	0.922742	11	Putative pantetheine-phosphate adenylyltransferase (PPAT) that catalyzes the fourth step in the biosynthesis of coenzyme A from pantothenate; conserved in bacteria, humans, and plants; essential for viability
CWC22	YGR278W	S000003510	0.59	2.391	1.48129	6	Essential protein, component of a complex containing Cef1p, has similarity to S. pombe Cwf22p; putative spliceosomal component, based on computational analysis of large-scale protein-protein interaction data
SCW4	YGR279C	S000003511	-0.67	1.917	1.35397	9	Cell wall protein with similarity to glucanases; scw4 scw10 double mutants exhibit defects in mating
PXR1	YGR280C	S000003512	1.15	1.899	0.382041	6	Essential protein involved in rRNA and snoRNA maturation; competes with TLC1 RNA for binding to Est2p, suggesting a role in negative regulation of telomerase; human homolog inhibits telomerase; contains a G-patch RNA interacting domain
YOR1	YGR281W	S000003513	0.88	2.13	1.16445	24	Plasma membrane ATP-binding cassette (ABC) transporter, multidrug transporter mediates export of many different organic anions including oligomycin
BGL2	YGR282C	S000003514	-0.15	3.007	1.93925	7	Endo-beta-1,3-glucanase, major protein of the cell wall, involved in cell wall maintenance
YGR283C	YGR283C	S000003515	-0.59	3.249	0.600735	3	Protein of unknown function; may interact with ribosomes, based on co-purification experiments; deletion mutant is resistant to fluconazole; green fluorescent protein (GFP)-fusion protein localizes to the nucleolus
ERV29	YGR284C	S000003516	-0.99	3.046	3.18965	7	Protein localized to COPII-coated vesicles, involved in vesicle formation and incorporation of specific secretory cargo
ZUO1	YGR285C	S000003517	0.54	1.868	0.74582	19	Cytosolic ribosome-associated chaperone that acts, together with Ssz1p and the Ssb proteins, as a chaperone for nascent polypeptide chains; contains a DnaJ domain and functions as a J-protein partner for Ssb1p and Ssb2p
BIO2	YGR286C	S000003518	0.67	1.305	0.105138	12	Biotin synthase, catalyzes the conversion of dethiobiotin to biotin, which is the last step of the biotin biosynthesis pathway; complements E. coli bioB mutant
YGR287C	YGR287C	S000003519	0.09	1.287	1.30767	5	Protein of unknown function that may interact with ribosomes, based on co-purification experiments; has similarity to alpha-D-glucosidase (maltase); authentic, non-tagged protein detected in purified mitochondria in high-throughput studies
RPL14B	YHL001W	S000000993	0.22	1.09	0.640624	16	Protein component of the large (60S) ribosomal subunit, nearly identical to Rpl14Ap and has similarity to rat L14 ribosomal protein
HSE1	YHL002W	S000000994	-0.14	2.004	1.35505	10	Subunit of the endosomal Vps27p-Hse1p complex required for sorting of ubiquitinated membrane proteins into intralumenal vesicles prior to vacuolar degradation, as well as for recycling of Golgi proteins and formation of lumenal membranes
LAG1	YHL003C	S000000995	-1.05	2.954	0.929547	5	Ceramide synthase component, involved in synthesis of ceramide from C26(acyl)-coenzyme A and dihydrosphingosine or phytosphingosine, functionally equivalent to Lac1p
MRP4	YHL004W	S000000996	0	2.281	0.933842	8	Mitochondrial ribosomal protein of the small subunit
SHU1	YHL006C	S000000998	-0.18	1.705	1.48895	2	Protein of unassigned function involved in mutation suppression, important for error-free repair of spontaneous and induced DNA lesions to protect the genome from mutation; associates with Shu2p, Psy3p, and Csm2p
STE20	YHL007C	S000000999	-0.45	3.574	0.907142	23	Signal transducing kinase of the PAK (p21-activated kinase) family, involved in pheromone response and pseudohyphal/invasive growth pathways, activated by Cdc42p; binds Ste4p at a GBB motif present in noncatalytic domains of PAK kinases
YHL008C	YHL008C	S000001000	0.39	2.938	0.65738	1	Putative protein of unknown function, does not appear to be involved in monocarboxylic acid transport; green fluorescent protein (GFP)-fusion protein localizes to the vacuole
YAP3	YHL009C	S000001001	0.49	3.447	0.875725	8	Basic leucine zipper (bZIP) transcription factor
YHL010C	YHL010C	S000001002	-1.73	2.713	2.33383	3	Putative protein of unknown function, contains a zinc finger region and has homology to human BRAP2, which is a cytoplasmic protein that binds nuclear localization sequences
PRS3	YHL011C	S000001003	0.65	2.654	0.935461	12	5-phospho-ribosyl-1(alpha)-pyrophosphate synthetase, synthesizes PRPP, which is required for nucleotide, histidine, and tryptophan biosynthesis; one of five related enzymes, which are active as heteromultimeric complexes
OTU2	YHL013C	S000001005	-0.16	2.507	0.957935	6	Protein of unknown function that may interact with ribosomes, based on co-purification experiments; member of the ovarian tumor-like (OTU) superfamily of predicted cysteine proteases; shows cytoplasmic localization
YLF2	YHL014C	S000001006	2.84	3.85	1.33154	2	Protein of unknown function, has weak similarity to E. coli GTP-binding protein gtp1; the authentic, non-tagged protein is detected in highly purified mitochondria in high-throughput studies
RPS20	YHL015W	S000001007	0.59	1.897	0.564326	13	Protein component of the small (40S) ribosomal subunit; overproduction suppresses mutations affecting RNA polymerase III-dependent transcription; has similarity to E. coli S10 and rat S20 ribosomal proteins
YHL017W	YHL017W	S000001009	-0.06	1.704	0.793609	1	Putative protein of unknown function; green fluorescent protein (GFP)-fusion protein co-localizes with clathrin-coated vesicles
YHL018W	YHL018W	S000001010	0.15	1.492	1.09851	2	Putative protein of unknown function; green fluorescent protein (GFP)-fusion protein localizes to mitochondria and is induced in response to the DNA-damaging agent MMS
APM2	YHL019C	S000001011	0.09	2.917	1.17032	4	Protein of unknown function, homologous to the medium chain of mammalian clathrin-associated protein complex; involved in vesicular transport
OPI1	YHL020C	S000001012	1.34	2.514	0.518386	9	Transcriptional regulator of a variety of genes; phosphorylation by protein kinase A stimulates Opi1p function in negative regulation of phospholipid biosynthetic genes; involved in telomere maintenance
YHL021C	YHL021C	S000001013	-0.6	2.727	2.7708	12	Putative protein of unknown function; the authentic, non-tagged protein is detected in highly purified mitochondria in high-throughput studies; null mutant displays decreased frequency of mitochondrial genome loss (petite formation)
RMD11	YHL023C	S000001015	-0.8	4.534	1.21858	6	Protein required for meiosis
RIM4	YHL024W	S000001016	-0.14	4.771	0.423021	1	Putative RNA-binding protein required for the expression of early and middle sporulation genes
SNF6	YHL025W	S000001017	-0.07	3.081	0.827023	5	Subunit of the SWI/SNF chromatin remodeling complex involved in transcriptional regulation; functions interdependently in transcriptional activation with Snf2p and Snf5p
RIM101	YHL027W	S000001019	-1.74	2.158	0.596254	5	Transcriptional repressor involved in response to pH and in cell wall construction; required for alkaline pH-stimulated haploid invasive growth and sporulation; activated by proteolytic processing; similar to A. nidulans PacC
WSC4	YHL028W	S000001020	1.64	3.106	0.0661049	3	ER membrane protein involved in the translocation of soluble secretory proteins and insertion of membrane proteins into the ER membrane; may also have a role in the stress response but has only partial functional overlap with WSC1-3
YHL029C	YHL029C	S000001021	0.1	2.308	0.978945	7	Cytoplasmic protein required for replication of Brome mosaic virus in S. cerevisiae, which is a model system for studying replication of positive-strand RNA viruses in their natural hosts
ECM29	YHL030W	S000001022	-0.05	2.747	1.49723	55	Major component of the proteasome; tethers the proteasome core particle to the regulatory particle, and enhances the stability of the proteasome
GOS1	YHL031C	S000001023	0.19	3.06	0.932354	12	v-SNARE protein involved in Golgi transport, homolog of the mammalian protein GOS-28/GS28
GUT1	YHL032C	S000001024	-0.24	2.103	0.825034	2	Glycerol kinase, converts glycerol to glycerol-3-phosphate; glucose repression of expression is mediated by Adr1p and Ino2p-Ino4p; derepression of expression on non-fermentable carbon sources is mediated by Opi1p and Rsf1p
RPL8A	YHL033C	S000001025	0.33	1.629	0.619081	32	Ribosomal protein L4 of the large (60S) ribosomal subunit, nearly identical to Rpl8Bp and has similarity to rat L7a ribosomal protein; mutation results in decreased amounts of free 60S subunits
SBP1	YHL034C	S000001026	-0.6	1.763	0.952836	8	Putative RNA binding protein; involved in translational repression and found in cytoplasmic P bodies; found associated with small nucleolar RNAs snR10 and snR11
VMR1	YHL035C	S000001027	-0.75	2.102	1.04138	3	Protein of unknown function that may interact with ribosomes, based on co-purification experiments; member of the ATP-binding cassette (ABC) family; potential Cdc28p substrate; detected in purified mitochondria in high-throughput studies
CBP2	YHL038C	S000001030	0.56	2.386	1.75887	6	Mitochondrial protein required for splicing of the group I intron aI5 of the COB pre-mRNA, binds to the RNA to promote splicing; also involved in but not essential for splicing of the COB bI2 intron and the intron in the 21S rRNA gene
YHL039W	YHL039W	S000001031	-1.44	4.47	0.833267	20	Putative protein of unknown function; green fluorescent protein (GFP)-fusion protein localizes to the cytoplasm
COS8	YHL048W	S000001040	0.27	1.988	19.0036	2	Nuclear membrane protein, member of the DUP380 subfamily of conserved, often subtelomerically-encoded proteins; regulation suggests a potential role in the unfolded protein response
OSH7	YHR001W	S000001043	-0.18	1.912	1.15934	15	Member of an oxysterol-binding protein family with seven members in S. cerevisiae; family members have overlapping, redundant functions in sterol metabolism and collectively perform a function essential for viability
QCR10	YHR001W-A	S000003529	-0.24	1.511	1.73201	2	Subunit of the ubiqunol-cytochrome c oxidoreductase complex which includes Cobp, Rip1p, Cyt1p, Cor1p, Qcr2p, Qcr6p, Qcr7p, Qcr8p, Qcr9p, and Qcr10p and comprises part of the mitochondrial respiratory chain
YHR003C	YHR003C	S000001045	-0.47	3.872	1.2524	11	Protein of unknown function, localized to the mitochondrial outer membrane
GPA1	YHR005C	S000001047	-0.88	2.1	0.929805	17	GTP-binding alpha subunit of the heterotrimeric G protein that couples to pheromone receptors; negatively regulates the mating pathway by sequestering G(beta)gamma and by triggering an adaptive response; activates Vps34p at the endosome
MRS11	YHR005C-A	S000003530	0.96	2.875	0.557329	7	Essential protein of the mitochondrial intermembrane space, forms a complex with Tim9p (TIM10 complex) that mediates insertion of hydrophobic proteins at the inner membrane, has homology to Mrs5p, which is also involved in this process
STP2	YHR006W	S000001048	-1.99	3.056	0.454767	1	Transcription factor, activated by proteolytic processing in response to signals from the SPS sensor system for external amino acids; activates transcription of amino acid permease genes
ERG11	YHR007C	S000001049	-0.64	1.877	0.681011	16	Lanosterol 14-alpha-demethylase, catalyzes the C-14 demethylation of lanosterol to form 4,4''-dimethyl cholesta-8,14,24-triene-3-beta-ol in the ergosterol biosynthesis pathway; member of the cytochrome P450 family
SOD2	YHR008C	S000001050	-1.34	1.741	1.3108	11	Mitochondrial superoxide dismutase, protects cells against oxygen toxicity; phosphorylated
YHR009C	YHR009C	S000001051	-0.04	5.858	0.822764	18	Putative protein of unknown function; not an essential gene
DIA4	YHR011W	S000001053	0.65	3.207	1.28045	2	Probable mitochondrial seryl-tRNA synthetase, mutant displays increased invasive and pseudohyphal growth
VPS29	YHR012W	S000001054	-0.26	2.842	1.48741	7	Endosomal protein that is a subunit of the membrane-associated retromer complex essential for endosome-to-Golgi retrograde transport; forms a subcomplex with Vps35p and Vps26p that selects cargo proteins for endosome-to-Golgi retrieval
ARD1	YHR013C	S000001055	0.11	2.217	0.697372	12	Subunit of the N-terminal acetyltransferase NatA (Nat1p, Ard1p, Nat5p); N-terminally acetylates many proteins, which influences multiple processes such as the cell cycle, heat-shock resistance, mating, sporulation, and telomeric silencing
YSC84	YHR016C	S000001058	-0.26	4.287	1.74857	10	Protein involved in the organization of the actin cytoskeleton; contains SH3 domain similar to Rvs167p
YSC83	YHR017W	S000001059	0.11	2.348	2.41245	6	Non-essential mitochondrial protein of unknown function; mRNA induced during meiosis, peaking between mid to late prophase of meiosis I; similar to S. douglasii YSD83
ARG4	YHR018C	S000001060	2.39	2.961	0.761808	23	Argininosuccinate lyase, catalyzes the final step in the arginine biosynthesis pathway
DED81	YHR019C	S000001061	1.78	4.571	0.615316	27	Cytosolic asparaginyl-tRNA synthetase, required for protein synthesis, catalyzes the specific attachment of asparagine to its cognate tRNA
YHR020W	YHR020W	S000001062	0.52	2.737	0.829435	40	Protein of unknown function that may interact with ribosomes, based on co-purification experiments; has similarity to proline-tRNA ligase; YHR020W is an essential gene
RPS27B	YHR021C	S000001063	-0.39	2.269	0.490976	4	Protein component of the small (40S) ribosomal subunit; nearly identical to Rps27Ap and has similarity to rat S27 ribosomal protein
MYO1	YHR023W	S000001065	0.82	1.981	0.578825	25	Type II myosin heavy chain, required for wild-type cytokinesis and cell separation; localizes to the actomyosin ring; binds to myosin light chains Mlc1p and Mlc2p through its IQ1 and IQ2 motifs respectively
MAS2	YHR024C	S000001066	0.46	2.496	0.900189	17	Larger subunit of the mitochondrial processing protease (MPP), essential processing enzyme that cleaves the N-terminal targeting sequences from mitochondrially imported proteins
THR1	YHR025W	S000001067	-0.24	1.551	0.682973	15	Homoserine kinase, conserved protein required for threonine biosynthesis; expression is regulated by the GCN4-mediated general amino acid control pathway
RPN1	YHR027C	S000001069	-1.13	3.434	1.20694	38	Non-ATPase base subunit of the 19S regulatory particle of the 26S proteasome; may participate in the recognition of several ligands of the proteasome; contains a leucine-rich repeat (LRR) domain, a site for protein?protein interactions
DAP2	YHR028C	S000001070	0.88	2.091	0.904129	14	Dipeptidyl aminopeptidase, synthesized as a glycosylated precursor; localizes to the vacuolar membrane; similar to Ste13p
YHI9	YHR029C	S000001071	-0.44	2.365	1.19681	11	Protein of unknown function; null mutant is defective in unfolded protein response; possibly involved in a membrane regulation metabolic pathway; member of the PhzF superfamily, though most likely not involved in phenazine production
SLT2	YHR030C	S000001072	0.11	2.233	3.69276	21	Serine/threonine MAP kinase involved in regulating the maintenance of cell wall integrity and progression through the cell cycle; regulated by the PKC1-mediated signaling pathway
RRM3	YHR031C	S000001073	-1.22	2.438	1.09771	3	DNA helicase involved in rDNA replication and Ty1 transposition; relieves replication fork pauses at telomeric regions; structurally and functionally related to Pif1p
PIH1	YHR034C	S000001076	0.85	3.585	0.82863	4	Protein of unresolved function; may function in protein folding and/or rRNA processing, interacts with a chaperone (Hsp82p), two chromatin remodeling factors (Rvb1p, Rvb2p) and two rRNA processing factors (Rrp43p, Nop58p)
[truncated: 2,476 more rows]
