# Supplementary material for: Quantification of tunicamycin-induced protein expression and N-glycosylation changes in yeast
Source: Royal Society of Chemistry journal article supplement (doi:10.1039/c6an00144k), 2016-01-01
Supplement: c6an00144k3.xlsx [file c6an00144k3.xlsx]

## Sheet: Unique Sites Identified
Table S-5. Identified Glycosylation Sites (448)
Gene Symbol	Reference	SGD ID	PPM	XCorr	z	Obs m/z	Glycoeptide	Site	ModScore	Annotation
YPS3	YLR121C	S000004111	-0.14	3.093	3	1000.45	K.TLGYYEYTCPSSDN*K#TSVAFDFGGFR@.I	328	1000	Aspartic protease, attached to the plasma membrane via a glycosylphosphatidylinositol (GPI) anchor
YPS3	YLR121C	S000004111	0.3	2.308	2	532.823	K.R@N*ITLTTTK#.L	275	1000	Aspartic protease, attached to the plasma membrane via a glycosylphosphatidylinositol (GPI) anchor
PST1	YDR055W	S000002462	3.94	3.129	2	1096.02	K.SPVETVSDSLQFSFN*GN*QTK.I	194	1000	Cell wall protein that contains a putative GPI-attachment site; secreted by regenerating protoplasts; up-regulated by activation of the cell integrity pathway, as mediated by Rlm1p; upregulated by cell wall damage via disruption of FKS1
PST1	YDR055W	S000002462	3.94	3.129	2	1096.02	K.SPVETVSDSLQFSFN*GN*QTK.I	196	1000	Cell wall protein that contains a putative GPI-attachment site; secreted by regenerating protoplasts; up-regulated by activation of the cell integrity pathway, as mediated by Rlm1p; upregulated by cell wall damage via disruption of FKS1
PST1	YDR055W	S000002462	0.49	4.039	2	760.898	R.CDTLVGN*LTIGGGLK.T	57	1000	Cell wall protein that contains a putative GPI-attachment site; secreted by regenerating protoplasts; up-regulated by activation of the cell integrity pathway, as mediated by Rlm1p; upregulated by cell wall damage via disruption of FKS1
EXG2	YDR261C	S000002669	-0.52	2.204	3	1370.61	R.YDGSYYN*TTLFTTN*DKPVGTCISQN*SLADWTQDYR@.D	401	1000	Exo-1,3-beta-glucanase, involved in cell wall beta-glucan assembly; may be anchored to the plasma membrane via a glycosylphosphatidylinositol (GPI) anchor
EXG2	YDR261C	S000002669	-0.52	2.204	3	1370.61	R.YDGSYYN*TTLFTTN*DKPVGTCISQN*SLADWTQDYR@.D	408	1000	Exo-1,3-beta-glucanase, involved in cell wall beta-glucan assembly; may be anchored to the plasma membrane via a glycosylphosphatidylinositol (GPI) anchor
EXG2	YDR261C	S000002669	-0.52	2.204	3	1370.61	R.YDGSYYN*TTLFTTN*DKPVGTCISQN*SLADWTQDYR@.D	419	1000	Exo-1,3-beta-glucanase, involved in cell wall beta-glucan assembly; may be anchored to the plasma membrane via a glycosylphosphatidylinositol (GPI) anchor
SKN1	YGR143W	S000003375	-2.36	5.582	2	1128.55	K.DLEWYSPDAVTTTN*GTLTLR.M	426	1000	Protein involved in sphingolipid biosynthesis; type II membrane protein with similarity to Kre6p
PLB3	YOL011W	S000005371	0.21	4.275	2	733.853	R.ATAN*FSDSSEVLSK#.L	82	1000	Phospholipase B (lysophospholipase) involved in phospholipid metabolism; hydrolyzes phosphatidylinositol and phosphatidylserine and displays transacylase activity in vitro
SIP18	YMR175W	S000004787	3.14	1.286	4	530.938	R.DDMN*MDM^GMGHDQSEGGM^K.M	36	1000	Protein of unknown function whose expression is induced by osmotic stress
TDH3	YGR192C	S000003424	4.94	2.991	3	868.111	K.VIN*DAFGIEEGLM^TTVHSLTATQK#.T	163	1000	Glyceraldehyde-3-phosphate dehydrogenase, isozyme 3, involved in glycolysis and gluconeogenesis; tetramer that catalyzes the reaction of glyceraldehyde-3-phosphate to 1,3 bis-phosphoglycerate; detected in the cytoplasm and cell-wall
PMT3	YOR321W	S000005848	1.07	2.49	3	511.266	R.IR@GVEPWTDAEN*K#.T	398	1000	Protein O-mannosyltransferase, transfers mannose residues from dolichyl phosphate-D-mannose to protein serine/threonine residues; acts in a complex with Pmt5p, can instead interact with Pmt1p in some conditions; target for new antifungals
EGT2	YNL327W	S000005271	-0.15	3.846	3	934.788	K.GSQQN*ITFQVPDAFSSFPQEPFSIK.H	65	1000	Glycosylphosphatidylinositol (GPI)-anchored cell wall endoglucanase required for proper cell separation after cytokinesis, expression is activated by Swi5p and tightly regulated in a cell cycle-dependent manner
ROT1	YMR200W	S000004813	0.24	2.072	2	521.247	R.YN*QTETFK#.E	139	1000	Essential ER membrane protein; may be involved in protein folding; mutation causes defects in cell wall synthesis and in lysis of autophagic bodies, suppresses tor2 mutations, and is synthetically lethal with kar2-1 and with rot2 mutations
CRH1	YGR189C	S000003421	0.06	2.774	3	523.234	K.FHN*YTLDWAM^DK#.T	177	1000	Putative chitin transglycosidase, cell wall protein that functions in the transfer of chitin to beta(1-6)glucan; localizes to sites of polarized growth; expression is induced under cell wall stress conditions
YLR001C	YLR001C	S000003991	0.2	2.835	3	490.571	K.YLHGLN*CSEFVK.E	333	1000	Putative protein of unknown function; the authentic, non-tagged protein is detected in highly purified mitochondria in high-throughput studies; YLR001C is not an essential gene
ROT2	YBR229C	S000000433	0.16	2.738	3	602.982	K.ER@M^PTN*SSGLLISSQR@.F	114	1000	Glucosidase II catalytic subunit required for normal cell wall synthesis; mutations in rot2 suppress tor2 mutations, and are synthetically lethal with rot1 mutations
STE13	YOR219C	S000005745	0.28	3.327	2	592.77	R.FN*DTSVDDIR.L	377	1000	Dipeptidyl aminopeptidase, Golgi integral membrane protein that cleaves on the carboxyl side of repeating -X-Ala- sequences, required for maturation of alpha factor, transcription is induced by a-factor
SLN1	YIL147C	S000001409	0.54	2.693	3	578.97	K.VFSIKN*DTFISSAFR.N	272	1000	Histidine kinase osmosensor that regulates a MAP kinase cascade; transmembrane protein with an intracellular kinase domain that signals to Ypd1p and Ssk1p, thereby forming a phosphorelay system similar to bacterial two-component regulators
HMG2	YLR450W	S000004442	-0.9	2.828	3	750.725	R.YLLSEEPKIPTELVSEN*GTK.W	150	1000	One of two isozymes of HMG-CoA reductase that convert HMG-CoA to mevalonate, a rate-limiting step in sterol biosynthesis; overproduction induces assembly of peripheral ER membrane arrays and short nuclear-associated membrane stacks
ENO2	YHR174W	S000001217	1.69	3.45	2	712.401	K.LGAN*AILGVSMAAAR@.A	109	1000	Enolase II, a phosphopyruvate hydratase that catalyzes the conversion of 2-phosphoglycerate to phosphoenolpyruvate during glycolysis and the reverse reaction during gluconeogenesis; expression is induced in response to glucose
PLB3	YOL011W	S000005371	-0.34	3.471	3	465.592	R.IN*STHLPSFITR@.L	351	1000	Phospholipase B (lysophospholipase) involved in phospholipid metabolism; hydrolyzes phosphatidylinositol and phosphatidylserine and displays transacylase activity in vitro
SOP4	YJL192C	S000003728	-1.17	2.364	2	784.413	R.LDLAASN*ITGFVSTR.T	35	1000	ER-membrane protein; suppressor of pma1-7, deletion of SOP4 slows down the export of wild-type Pma1p and Pma1-7 from the ER
KRE5	YOR336W	S000005863	0.56	2.301	3	721.714	K.SVEYPLTHPLEITLQN*GSR@.M	228	1000	Protein required for beta-1,6 glucan biosynthesis; mutations result in aberrant morphology and severe growth defects
MNN4	YKL201C	S000001684	-0.15	2.519	2	684.832	K.SMN*QTTLDQVTK.I	915	1000	Putative positive regulator of mannosylphosphate transferase (Mnn6p), involved in mannosylphosphorylation of N-linked oligosaccharides; expression increases in late-logarithmic and stationary growth phases
CPS1	YJL172W	S000003708	0.46	2.627	4	543.026	K.HSVDTILHDPAFRN*SSIEK.L	88	1000	Vacuolar carboxypeptidase yscS; expression is induced under low-nitrogen conditions
PMT2	YAL023C	S000000021	-0.24	4.236	2	1280.12	R.GLPSWSEN*ETDIEYLK#PGTSYR@.L	403	1000	Protein O-mannosyltransferase, transfers mannose residues from dolichyl phosphate-D-mannose to protein serine/threonine residues; acts in a complex with Pmt1p, can instead interact with Pmt5p in some conditions; target for new antifungals
VAN1	YML115C	S000004583	-1.76	4.841	3	863.44	R.HLQN*GTLSQIFQEIDAVIDSQTK.G	251	1000	Component of the mannan polymerase I, which contains Van1p and Mnn9p and is involved in the first steps of mannan synthesis; mutants are vanadate-resistant
MNL1	YHR204W	S000001247	-0.57	3.134	3	654.987	K.HSPVLTSN*GTR@EEDEFK#.M	762	1000	Alpha mannosidase-like protein of the endoplasmic reticulum required for degradation of glycoproteins but not for processing of N-linked oligosaccharides
KRE5	YOR336W	S000005863	0.52	2.249	2	563.798	K.DITATLN*FTK.S	293	1000	Protein required for beta-1,6 glucan biosynthesis; mutations result in aberrant morphology and severe growth defects
APE3	YBR286W	S000000490	0.3	2.802	3	548.279	K.AHHLN*YTLVPFDGR.S	427	1000	Vacuolar aminopeptidase Y, processed to mature form by Prb1p
LHS1	YKL073W	S000001556	0.28	4.399	2	791.385	K.LSN*ESELYDVFTR@.G	458	1000	Molecular chaperone of the endoplasmic reticulum lumen, involved in polypeptide translocation and folding; member of the Hsp70 family; localizes to the lumen of the ER; regulated by the unfolded protein response pathway
AXL2	YIL140W	S000001402	0.17	4.031	2	751.397	K.FQSSN*LTLAGEVPK#.N	403	1000	Integral plasma membrane protein required for axial budding in haploid cells, localizes to the incipient bud site and bud neck; glycosylated by Pmt4p; potential Cdc28p substrate
KRE6	YPR159W	S000006363	-0.39	3.522	2	1135.05	K.DLEWYSPDASTTVN*GTLQLR.M	374	1000	Protein required for beta-1,6 glucan biosynthesis; putative beta-glucan synthase; appears functionally redundant with Skn1p
APE3	YBR286W	S000000490	1.2	3.539	2	1019.02	K.SFAN*TTAFALSPPVDGFVGK#.L	162	1000	Vacuolar aminopeptidase Y, processed to mature form by Prb1p
ROT2	YBR229C	S000000433	0.25	3.172	3	667.006	K.ISSFLSLSN*STADTFHLR.N	173	1000	Glucosidase II catalytic subunit required for normal cell wall synthesis; mutations in rot2 suppress tor2 mutations, and are synthetically lethal with rot1 mutations
EXG2	YDR261C	S000002669	0.26	3.226	2	748.364	K.FASYYAN*DTITVK.G	50	1000	Exo-1,3-beta-glucanase, involved in cell wall beta-glucan assembly; may be anchored to the plasma membrane via a glycosylphosphatidylinositol (GPI) anchor
ROT2	YBR229C	S000000433	-0.61	1.661	2	418.201	R.FN*ETWK#.Y	126	1000	Glucosidase II catalytic subunit required for normal cell wall synthesis; mutations in rot2 suppress tor2 mutations, and are synthetically lethal with rot1 mutations
PRC1	YMR297W	S000004912	1.27	4.153	3	626.655	K.VRN*WTASITDEVAGEVK.S	479	1000	Vacuolar carboxypeptidase Y (proteinase C), broad-specificity C-terminal exopeptidase involved in non-specific protein degradation in the vacuole; member of the serine carboxypeptidase family
POM152	YMR129W	S000004736	0.87	2.315	2	625.32	K.IM^N*VTTDSLTK#.V	569	1000	Nuclear pore membrane glycoprotein; may be involved in duplication of nuclear pores and nuclear pore complexes during S-phase;
DCW1	YKL046C	S000001529	-0.63	4.335	2	826.355	K.YVYDGVSIDDN*CTK.V	240	1000	Putative mannosidase, GPI-anchored membrane protein required for cell wall biosynthesis in bud formation;homologous to Dfg5p
PDI1	YCL043C	S000000548	0.07	2.754	3	1075.25	K.QSQPAVAVVADLPAYLAN*ETFVTPVIVQSGK#.I	155	1000	Protein disulfide isomerase, multifunctional protein resident in the endoplasmic reticulum lumen, essential for the formation of disulfide bonds in secretory and cell-surface proteins, unscrambles non-native disulfide bonds
YNR048W	YNR048W	S000005331	0.39	4.421	2	1223.09	K.VAVQPQWMVLTDPELGN*QTCR.I	123	1000	Protein proposed to interact with phospholipid translocases, shares similarity to Cdc50p
POM152	YMR129W	S000004736	1.26	3.368	2	955.468	R.IN*STEEIEYIELEYR@.D	280	1000	Nuclear pore membrane glycoprotein; may be involved in duplication of nuclear pores and nuclear pore complexes during S-phase;
NCR1	YPL006W	S000005927	0.27	4.92	2	1083.04	R.APYSTALVYN*ETSVSASVFR.T	940	1000	Vacuolar membrane protein that transits through the biosynthetic vacuolar protein sorting pathway, involved in sphingolipid metabolism; glycoprotein and functional orthologue of human Niemann Pick C1 (NPC1) protein
APE3	YBR286W	S000000490	-0.35	3.593	3	603.986	K.IK#VDDLN*ATAWDLYR@.L	85	1000	Vacuolar aminopeptidase Y, processed to mature form by Prb1p
GPI16	YHR188C	S000001231	1.21	3.859	3	620.308	R.RSYASDIGAPLFN*STEK.L	184	1000	Transmembrane protein subunit of the glycosylphosphatidylinositol transamidase complex that adds GPIs to newly synthesized proteins; human PIG-Tp homolog
MCD4	YKL165C	S000001648	1.52	6.208	3	808.061	R.HLDQLFHN*STLN*STLDYEIR.Q	198	1000	Protein involved in glycosylphosphatidylinositol (GPI) anchor synthesis; multimembrane-spanning protein that localizes to the endoplasmic reticulum; highly conserved among eukaryotes
MCD4	YKL165C	S000001648	1.52	6.208	3	808.061	R.HLDQLFHN*STLN*STLDYEIR.Q	202	1000	Protein involved in glycosylphosphatidylinositol (GPI) anchor synthesis; multimembrane-spanning protein that localizes to the endoplasmic reticulum; highly conserved among eukaryotes
ECM38	YLR299W	S000004290	-0.62	3.493	3	617.3	K.EDWSFVLN*STHDGVLK.E	270	1000	Gamma-glutamyltranspeptidase, major glutathione-degrading enzyme; involved in detoxification of electrophilic xenobiotics; expression induced mainly by nitrogen starvation
NPP1	YCR026C	S000000621	-0.18	3.151	3	560.924	K.AATHMWPGSDVN*YTK.Y	296	1000	Nucleotide pyrophosphatase/phosphodiesterase family member; mediates extracellular nucleotide phosphate hydrolysis along with Npp2p and Pho5p; activity and expression enhanced during conditions of phosphate starvation
APE3	YBR286W	S000000490	1.22	2.695	3	532.252	R.LAN*YSTPDYGHPTR.V	96	1000	Vacuolar aminopeptidase Y, processed to mature form by Prb1p
GAA1	YLR088W	S000004078	-0.02	2.344	2	615.756	K.EMVN*MTSMER.N	87	1000	Subunit of the GPI (glycosylphosphatidylinositol):protein transamidase complex, removes the GPI-anchoring signal and attaches GPI to proteins in the ER
EPS1	YIL005W	S000001267	-0.19	2.692	2	644.326	K.FPN*ITEGELEK#.K	299	1000	ER protein with chaperone and co-chaperone activity, involved in retention of resident ER proteins; has a role in recognizing proteins targeted for ER-associated degradation (ERAD), member of the protein disulfide isomerase family
YBR139W	YBR139W	S000000343	-0.17	4.761	2	976.371	R.GPCEDN*STDGM^CYTGLR.Y	339	1000	Putative serine type carboxypeptidase with a role in phytochelatin synthesis; green fluorescent protein (GFP)-fusion protein localizes to the vacuole; expression induced by nitrogen limitation in a GLN3, GAT1-independent manner
TED1	YIL039W	S000001301	0.76	3.071	3	575.975	K.FN*GSTVLLTHVPFYK.R	307	1000	Conserved phosphoesterase domain-containing protein that acts together with Emp24p/Erv25p in cargo exit from the ER; deletion confers sensitivity to 4-(N-(S-glutathionylacetyl)amino) phenylarsenoxide (GSAO)
WBP1	YEL002C	S000000728	0.34	3.293	3	936.443	R.LTLSPSGN*DSETQYYTTGEFILPDR.H	332	1000	Beta subunit of the oligosaccharyl transferase (OST) glycoprotein complex; required for N-linked glycosylation of proteins in the endoplasmic reticulum
KRE5	YOR336W	S000005863	0.49	2.168	2	825.474	R.FLFLDVLLPQN*ISK.V	1195	1000	Protein required for beta-1,6 glucan biosynthesis; mutations result in aberrant morphology and severe growth defects
YGP1	YNL160W	S000005104	0.31	2.715	2	524.774	R.VVN*ETIQDK.S	118	1000	Cell wall-related secretory glycoprotein; induced by nutrient deprivation-associated growth arrest and upon entry into stationary phase; may be involved in adaptation prior to stationary phase entry; has similarity to Sps100p
CPS1	YJL172W	S000003708	-1.75	3.252	2	731.381	K.LVEYISN*QSHLR.S	381	1000	Vacuolar carboxypeptidase yscS; expression is induced under low-nitrogen conditions
APE3	YBR286W	S000000490	0.93	4.109	2	699.357	K.IISFN*LSDAETGK.S	150	1000	Vacuolar aminopeptidase Y, processed to mature form by Prb1p
PDI1	YCL043C	S000000548	2.69	4.733	3	876.456	K.RLAPTYQELADTYAN*ATSDVLIAK.L	425	1000	Protein disulfide isomerase, multifunctional protein resident in the endoplasmic reticulum lumen, essential for the formation of disulfide bonds in secretory and cell-surface proteins, unscrambles non-native disulfide bonds
YBR074W	YBR074W	S000000278	-0.61	4.851	2	902.938	R.SILFQQQDPFN*ESSR@.F	121	1000	Putative metalloprotease
MID1	YNL291C	S000005235	-0.61	3.566	3	772.039	K.TLM^AQTYDHIAEALYAN*FSK#.A	407	1000	N-glycosylated integral membrane protein of the ER membrane and plasma membrane, functions as a stretch-activated Ca2+-permeable cation channel required for Ca2+ influx stimulated by pheromone; interacts with Cch1p; forms an oligomer
PHO8	YDR481C	S000002889	0.47	3.284	3	1034.18	R.QVTASYPQYVWYPQVLAN*ATHSGEFLK.R	401	1000	Repressible alkaline phosphatase, a glycoprotein localized to the vacuole; regulated by levels of inorganic phosphate and by a system consisting of Pho4p, Pho9p, Pho80p, Pho81p and Pho85p; dephosphorylates phosphotyrosyl peptides
DCW1	YKL046C	S000001529	-0.19	4.354	2	789.354	R.YTGN*QTYVDWAEK.V	203	1000	Putative mannosidase, GPI-anchored membrane protein required for cell wall biosynthesis in bud formation;homologous to Dfg5p
PDR15	YDR406W	S000002814	1.01	4.825	3	838.082	R.RFPCAQYIPAGPAYQN*ITGTQR.V	744	1000	Plasma membrane ATP binding cassette (ABC) transporter, multidrug transporter and general stress response factor implicated in cellular detoxification; regulated by Pdr1p, Pdr3p and Pdr8p; promoter contains a PDR responsive element
YNL217W	YNL217W	S000005161	-0.01	4.327	3	687.371	K.IGGLGEN*ITM^ILLGDFIHK.G	90	1000	Hypothetical protein
GAS1	YMR307W	S000004924	-0.14	1.408	3	603.61	R.VYAIN*TTLDHSECM^K#.A	95	1000	Beta-1,3-glucanosyltransferase, required for cell wall assembly; localizes to the cell surface via a glycosylphosphatidylinositol (GPI) anchor
KTR1	YOR099W	S000005625	-0.3	2.843	2	590.819	K.N*VTSALVSGTTK.Y	120	1000	Alpha-1,2-mannosyltransferase involved in O- and N-linked protein glycosylation; type II membrane protein; member of the KRE2/MNT1 mannosyltransferase family
YLR001C	YLR001C	S000003991	0.36	1.679	2	485.781	K.IVGSQN*LTK#.I	569	1000	Putative protein of unknown function; the authentic, non-tagged protein is detected in highly purified mitochondria in high-throughput studies; YLR001C is not an essential gene
RAX2	YLR084C	S000004074	-0.87	2.254	2	702.342	K.SN*FTSTRLN*ETK.V	613	1000	N-glycosylated protein involved in the maintenance of bud site selection during bipolar budding; localization requires Rax1p
RAX2	YLR084C	S000004074	-0.87	2.254	2	702.342	K.SN*FTSTRLN*ETK.V	620	1000	N-glycosylated protein involved in the maintenance of bud site selection during bipolar budding; localization requires Rax1p
GAS5	YOL030W	S000005390	0.71	3.072	3	1050.17	R.GVDYQPGGSSN*LTDPLADASVCDRDVPVLK.D	60	1000	1,3-beta-glucanosyltransferase, has similarity to Gas1p; localizes to the cell wall
YLR001C	YLR001C	S000003991	-0.07	3.179	2	592.782	R.DLEN*GTYLEK.R	112	1000	Putative protein of unknown function; the authentic, non-tagged protein is detected in highly purified mitochondria in high-throughput studies; YLR001C is not an essential gene
FET3	YMR058W	S000004662	0.33	2.156	3	512.931	R.YTVLVHTKN*DTDK.N	265	1000	Ferro-O2-oxidoreductase required for high-affinity iron uptake and involved in mediating resistance to copper ion toxicity, belongs to class of integral membrane multicopper oxidases
PLB1	YMR008C	S000004610	0.55	4.45	2	762.373	K.DAGFN*ISLADVWGR.A	215	1000	Phospholipase B (lysophospholipase) involved in lipid metabolism, required for deacylation of phosphatidylcholine and phosphatidylethanolamine but not phosphatidylinositol
PHO3	YBR092C	S000000296	0.22	5.252	2	1476.67	R.EFLAQYGYM^FEN*QTSFPIFAASSER.V	162	1000	Constitutively expressed acid phosphatase similar to Pho5p; brought to the cell surface by transport vesicles; hydrolyzes thiamin phosphates in the periplasmic space, increasing cellular thiamin uptake; expression is repressed by thiamin
ECM33	YBR078W	S000000282	0.55	4.994	2	1170.12	K.VQTVGGAIEVTGN*FSTLDLSSLK.S	304	1000	GPI-anchored protein of unknown function, has a possible role in apical bud growth; GPI-anchoring on the plasma membrane crucial to function; phosphorylated in mitochondria; similar to Sps2p and Pst1p
CPS1	YJL172W	S000003708	-0.49	1.717	2	488.736	K.YYWN*LSK.N	525	1000	Vacuolar carboxypeptidase yscS; expression is induced under low-nitrogen conditions
MNS1	YJR131W	S000003892	1.2	3.499	3	712.37	R.M^LGGLLSAYHLSDVLEVGN*K.T	155	1000	Alpha-1,2-mannosidase involved in ER quality control; catalyzes the removal of one mannose residue from Man9GlcNAc to produce a single isomer of Man8GlcNAc in N-linked oligosaccharide biosynthesis; integral to ER membrane
RAX2	YLR084C	S000004074	-0.47	2.351	3	471.912	K.N*QTIQGDVHGITK.T	677	1000	N-glycosylated protein involved in the maintenance of bud site selection during bipolar budding; localization requires Rax1p
PLB2	YMR006C	S000004608	0.04	2.391	2	795.882	K.QESLN*ATLPPECTK.C	567	1000	Phospholipase B (lysophospholipase) involved in phospholipid metabolism; displays transacylase activity in vitro; overproduction confers resistance to lysophosphatidylcholine
MKC7	YDR144C	S000002551	0.91	3.969	2	754.836	K.STAYSLFAN*DSDSK.H	286	1000	GPI-anchored aspartyl protease (yapsin) involved in protein processing; shares functions with Yap3p and Kex2p
MKC7	YDR144C	S000002551	0.18	2.815	3	513.926	K.GDKEDN*LTTLTTTK.I	346	1000	GPI-anchored aspartyl protease (yapsin) involved in protein processing; shares functions with Yap3p and Kex2p
ALG12	YNR030W	S000005313	0.29	3.514	3	1262.93	K.TEN*TTLLQEM^WPSFDFLITHEPTASQLPFEN*K.T	445	1000	Alpha-1,6-mannosyltransferase localized to the ER; responsible for the addition of the alpha-1,6 mannose to dolichol-linked Man7GlcNAc2, acts in the dolichol pathway for N-glycosylation
ALG12	YNR030W	S000005313	0.29	3.514	3	1262.93	K.TEN*TTLLQEM^WPSFDFLITHEPTASQLPFEN*K.T	473	1000	Alpha-1,6-mannosyltransferase localized to the ER; responsible for the addition of the alpha-1,6 mannose to dolichol-linked Man7GlcNAc2, acts in the dolichol pathway for N-glycosylation
MNN5	YJL186W	S000003722	1.01	2.576	2	489.269	K.LN*FSIPQR.E	136	1000	Alpha-1,2-mannosyltransferase, responsible for addition of the second alpha-1,2-linked mannose of the branches on the mannan backbone of oligosaccharides, localizes to an early Golgi compartment
PLB2	YMR006C	S000004608	0.57	4.817	2	827.902	K.SDAGFN*ISLSDLWAR.A	217	1000	Phospholipase B (lysophospholipase) involved in phospholipid metabolism; displays transacylase activity in vitro; overproduction confers resistance to lysophosphatidylcholine
LEM3	YNL323W	S000005267	0.22	2.969	3	668	K.TKYN*YTQIAPPPYWEK.M	279	1000	Membrane protein of the plasma membrane and ER, involved in translocation of phospholipids and alkylphosphocholine drugs across the plasma membrane
STE13	YOR219C	S000005745	2.42	4.879	2	1235.08	K.YAM^AVAPVTN*WTLYDSVYTER.Y	814	1000	Dipeptidyl aminopeptidase, Golgi integral membrane protein that cleaves on the carboxyl side of repeating -X-Ala- sequences, required for maturation of alpha factor, transcription is induced by a-factor
PLB1	YMR008C	S000004610	-0.04	2.778	2	791.362	R.EASGLSDN*ETEWLK.K	52	1000	Phospholipase B (lysophospholipase) involved in lipid metabolism, required for deacylation of phosphatidylcholine and phosphatidylethanolamine but not phosphatidylinositol
KRE2	YDR483W	S000002891	0.42	3.04	3	574.267	K.EHWSYPEWIN*QTK.A	197	1000	Alpha1,2-mannosyltransferase of the Golgi involved in protein mannosylation
GDA1	YEL042W	S000000768	-0.97	4.748	3	755.027	K.FGDEN*YTLYQFSHLGYGLK#.E	280	1000	Guanosine diphosphatase located in the Golgi, involved in the transport of GDP-mannose into the Golgi lumen by converting GDP to GMP after mannose is transferred its substrate
PHO11	YAR071W	S000000094	-0.37	2.195	2	507.765	K.HYN*DTLLK#.Q	461	1000	One of three repressible acid phosphatases, a glycoprotein that is transported to the cell surface by the secretory pathway; induced by phosphate starvation and coordinately regulated by PHO4 and PHO2
GNT1	YOR320C	S000005847	-0.26	3.249	2	692.853	K.LLVFN*QTEFDR.V	187	1000	N-acetylglucosaminyltransferase capable of modification of N-linked glycans in the Golgi apparatus
RAX2	YLR084C	S000004074	3.62	4.739	2	1094.55	R.LGSFN*LTN*STM^IPLLSGSEGK.L	980	1000	N-glycosylated protein involved in the maintenance of bud site selection during bipolar budding; localization requires Rax1p
RAX2	YLR084C	S000004074	3.62	4.739	2	1094.55	R.LGSFN*LTN*STM^IPLLSGSEGK.L	983	1000	N-glycosylated protein involved in the maintenance of bud site selection during bipolar budding; localization requires Rax1p
PHO11	YAR071W	S000000094	0.33	2.977	2	646.777	K.FQCSN*DTYVR.Y	390	1000	One of three repressible acid phosphatases, a glycoprotein that is transported to the cell surface by the secretory pathway; induced by phosphate starvation and coordinately regulated by PHO4 and PHO2
AXL2	YIL140W	S000001402	1.69	4.571	2	899.913	R.VN*ESFTFQISN*DTYK.S	41	1000	Integral plasma membrane protein required for axial budding in haploid cells, localizes to the incipient bud site and bud neck; glycosylated by Pmt4p; potential Cdc28p substrate
AXL2	YIL140W	S000001402	1.69	4.571	2	899.913	R.VN*ESFTFQISN*DTYK.S	50	1000	Integral plasma membrane protein required for axial budding in haploid cells, localizes to the incipient bud site and bud neck; glycosylated by Pmt4p; potential Cdc28p substrate
CWH41	YGL027C	S000002995	-0.01	2.453	2	750.374	K.FTN*ESLLWAPYR.S	42	1000	Processing alpha glucosidase I, ER type II integral membrane N-glycoprotein involved in assembly of cell wall beta 1,6 glucan and asparagine-linked protein glycosylation; also involved in ER protein quality control and sensing of ER stress
YBR074W	YBR074W	S000000278	0.34	4.581	3	643.322	K.RVLEITGN*SSFASVSDDK.E	96	1000	Putative metalloprotease
PHO3	YBR092C	S000000296	0.17	1.937	2	368.21	K.GLN*LTSK.D	250	1000	Constitutively expressed acid phosphatase similar to Pho5p; brought to the cell surface by transport vesicles; hydrolyzes thiamin phosphates in the periplasmic space, increasing cellular thiamin uptake; expression is repressed by thiamin
PHO3	YBR092C	S000000296	-0.2	1.731	2	378.692	K.LSN*YTR.Q	97	1000	Constitutively expressed acid phosphatase similar to Pho5p; brought to the cell surface by transport vesicles; hydrolyzes thiamin phosphates in the periplasmic space, increasing cellular thiamin uptake; expression is repressed by thiamin
KEX1	YGL203C	S000003171	0.76	3.649	4	628.052	K.YDRN*LTFVSVYN*ASHMVPFDK.S	459	1000	Protease involved in the processing of killer toxin and alpha factor precursor; cleaves Lys and Arg residues from the C-terminus of peptides and proteins
KEX1	YGL203C	S000003171	0.76	3.649	4	628.052	K.YDRN*LTFVSVYN*ASHMVPFDK.S	467	1000	Protease involved in the processing of killer toxin and alpha factor precursor; cleaves Lys and Arg residues from the C-terminus of peptides and proteins
YPS7	YDR349C	S000002757	0.78	2.467	3	1072.51	K.HPSYLM^N*DSTSSVPVSPGQIYEISFIDGR.A	106	1000	Putative GPI-anchored aspartic protease, located in the cytoplasm and endoplasmic reticulum
KTR7	YIL085C	S000001347	0.52	3.295	2	586.788	K.MN*ASFVMLTR.N	89	1000	Putative mannosyltransferase involved in protein glycosylation; member of the KRE2/MNT1 mannosyltransferase family
UTR2	YEL040W	S000000766	0.59	3.368	3	560.942	R.TLYKN*ETYN*ATTQK.Y	233	1000	Cell wall protein that functions in the transfer of chitin to beta(1-6)glucan; putative chitin transglycosidase; glycosylphosphatidylinositol (GPI)-anchored protein localized to the bud neck; has a role in cell wall maintenance
UTR2	YEL040W	S000000766	0.59	3.368	3	560.942	R.TLYKN*ETYN*ATTQK.Y	237	1000	Cell wall protein that functions in the transfer of chitin to beta(1-6)glucan; putative chitin transglycosidase; glycosylphosphatidylinositol (GPI)-anchored protein localized to the bud neck; has a role in cell wall maintenance
GAS1	YMR307W	S000004924	15.02	1.939	3	1029.45	R.GVAYQADTAN*ETSGSTVN*DPLAN*YESCSR.D	57	1000	Beta-1,3-glucanosyltransferase, required for cell wall assembly; localizes to the cell surface via a glycosylphosphatidylinositol (GPI) anchor
GAS1	YMR307W	S000004924	15.02	1.939	3	1029.45	R.GVAYQADTAN*ETSGSTVN*DPLAN*YESCSR.D	65	1000	Beta-1,3-glucanosyltransferase, required for cell wall assembly; localizes to the cell surface via a glycosylphosphatidylinositol (GPI) anchor
GAS1	YMR307W	S000004924	15.02	1.939	3	1029.45	R.GVAYQADTAN*ETSGSTVN*DPLAN*YESCSR.D	70	1000	Beta-1,3-glucanosyltransferase, required for cell wall assembly; localizes to the cell surface via a glycosylphosphatidylinositol (GPI) anchor
YLR413W	YLR413W	S000004405	-0.23	4.301	3	1043.24	K.VMPQVGPILTVLGSALTAPN*TTVDTIFGALK.A	72	1000	Putative protein of unknown function; YLR413W is not an essential gene
FET3	YMR058W	S000004662	0.21	3.058	2	771.89	K.N*VTDM^LYITVAQR.Y	244	1000	Ferro-O2-oxidoreductase required for high-affinity iron uptake and involved in mediating resistance to copper ion toxicity, belongs to class of integral membrane multicopper oxidases
GAS3	YMR215W	S000004828	0.25	2.176	2	931.987	K.ILTDYAVPTTFN*YTIK.N	422	1000	Putative 1,3-beta-glucanosyltransferase, has similarity to Gas1p; localizes to the cell wall
YLR413W	YLR413W	S000004405	0.03	2.292	2	1454.76	K.YVPYLFSLLAASSDPVSSFSSLVN*ITK.W	405	1000	Putative protein of unknown function; YLR413W is not an essential gene
SUR4	YLR372W	S000004364	-0.38	3.848	3	1010.81	-.M^N*TTTSTVIAAVADQFQSLN*SSSSCFLK.V	2	1000	Elongase, involved in fatty acid and sphingolipid biosynthesis; synthesizes very long chain 20-26-carbon fatty acids from C18-CoA primers; involved in regulation of sphingolipid biosynthesis
SUR4	YLR372W	S000004364	-0.38	3.848	3	1010.81	-.M^N*TTTSTVIAAVADQFQSLN*SSSSCFLK.V	20	1000	Elongase, involved in fatty acid and sphingolipid biosynthesis; synthesizes very long chain 20-26-carbon fatty acids from C18-CoA primers; involved in regulation of sphingolipid biosynthesis
YLR413W	YLR413W	S000004405	0.26	1.867	3	1064.21	K.AAM^GALTDLLN*YTTN*QTELLTSVESLALSK.E	318	1000	Putative protein of unknown function; YLR413W is not an essential gene
YLR413W	YLR413W	S000004405	0.26	1.867	3	1064.21	K.AAM^GALTDLLN*YTTN*QTELLTSVESLALSK.E	322	1000	Putative protein of unknown function; YLR413W is not an essential gene
CPR4	YCR069W	S000000665	1.1	3.576	2	1113.03	R.LAM^AYFGPDSN*TSEFIITTK.A	166	1000	Peptidyl-prolyl cis-trans isomerase (cyclophilin), catalyzes the cis-trans isomerization of peptide bonds N-terminal to proline residues; has a potential role in the secretory pathway
GTB1	YDR221W	S000002629	2.17	3.29	2	802.376	K.TFEYEPPKFN*LSE.-	699	1000	Glucosidase II beta subunit, forms a complex with alpha subunit Rot2p, involved in removal of two glucose residues from N-linked glycans during glycoprotein biogenesis in the ER
MNS1	YJR131W	S000003892	0.75	2.732	2	537.28	K.YLAYLTGN*R.T	224	1000	Alpha-1,2-mannosidase involved in ER quality control; catalyzes the removal of one mannose residue from Man9GlcNAc to produce a single isomer of Man8GlcNAc in N-linked oligosaccharide biosynthesis; integral to ER membrane
ECM33	YBR078W	S000000282	8.57	5.418	2	1122.1	K.AAFSN*LTTVGGGFIIAN*NTQLK.V	267	291.571	GPI-anchored protein of unknown function, has a possible role in apical bud growth; GPI-anchoring on the plasma membrane crucial to function; phosphorylated in mitochondria; similar to Sps2p and Pst1p
YGP1	YNL160W	S000005104	3.11	5.87	2	1012.53	R.LFN*SSSALN*ITELYNVAR@.V	100	244.911	Cell wall-related secretory glycoprotein; induced by nutrient deprivation-associated growth arrest and upon entry into stationary phase; may be involved in adaptation prior to stationary phase entry; has similarity to Sps100p
PLB1	YMR008C	S000004610	-2.15	5.266	2	1260.58	R.ATSN*FSDTSLLSTLFGSN*SSNMPK#.I	78	208.86	Phospholipase B (lysophospholipase) involved in lipid metabolism, required for deacylation of phosphatidylcholine and phosphatidylethanolamine but not phosphatidylinositol
GTB1	YDR221W	S000002629	0.3	5.097	3	934.78	R.GEYFNQLSHDPILYQFEQLN*STR.L	240	183.987	Glucosidase II beta subunit, forms a complex with alpha subunit Rot2p, involved in removal of two glucose residues from N-linked glycans during glycoprotein biogenesis in the ER
TED1	YIL039W	S000001301	-1.18	4.937	2	1067.48	K.DNYWIEYETN*TTHPWR@.I	266	183.277	Conserved phosphoesterase domain-containing protein that acts together with Emp24p/Erv25p in cargo exit from the ER; deletion confers sensitivity to 4-(N-(S-glutathionylacetyl)amino) phenylarsenoxide (GSAO)
RAX2	YLR084C	S000004074	0.25	5.011	2	813.893	R.N*LTM^IAN*ETLGSNAR.I	884	175.933	N-glycosylated protein involved in the maintenance of bud site selection during bipolar budding; localization requires Rax1p
PDI1	YCL043C	S000000548	0.77	4.739	2	855.883	K.IDADFN*ATFYSMANK.H	174	171.488	Protein disulfide isomerase, multifunctional protein resident in the endoplasmic reticulum lumen, essential for the formation of disulfide bonds in secretory and cell-surface proteins, unscrambles non-native disulfide bonds
FET5	YFL041W	S000001853	-0.53	3.822	3	673.661	K.LN*YTASWVTANPDGLHEK.R	24	166.516	Multicopper oxidase, integral membrane protein with similarity to Fet3p; may have a role in iron transport
FMP45	YDL222C	S000002381	0.06	4.859	2	1273.5	R.WYNYNWCGYEDGQLAN*CSSR.A	73	164.775	Integral membrane protein localized to mitochondria (untagged protein) and eisosomes, immobile patches at the cortex associated with endocytosis; sporulation and sphingolipid content are altered in mutants; has homologs SUR7 and YNL194C
PST1	YDR055W	S000002462	0.79	5.534	2	1037.03	K.IN*SSLGFIN*NSISSLN*FTK#.L	228	159.548	Cell wall protein that contains a putative GPI-attachment site; secreted by regenerating protoplasts; up-regulated by activation of the cell integrity pathway, as mediated by Rlm1p; upregulated by cell wall damage via disruption of FKS1
WBP1	YEL002C	S000000728	4.47	6.134	2	1249.61	R.NYKLEYLDIN*STSTTVDLYDK.E	60	158.84	Beta subunit of the oligosaccharyl transferase (OST) glycoprotein complex; required for N-linked glycosylation of proteins in the endoplasmic reticulum
YJL171C	YJL171C	S000003707	-0.91	6.062	3	1193.47	R.TSQYPTNAN*CSCWASGCGEYDIFEAM^N*GTEK#.N	267	151.699	GPI-anchored cell wall protein of unknown function; induced in response to cell wall damaging agents and by mutations in genes involved in cell wall biogenesis; sequence similarity to YBR162C/TOS1, a covalently bound cell wall protein
PLB2	YMR006C	S000004608	-4.12	4.211	2	1259.6	R.ATSN*FSDTSLLSTLFSSN*SSNVPK#.I	80	150.054	Phospholipase B (lysophospholipase) involved in phospholipid metabolism; displays transacylase activity in vitro; overproduction confers resistance to lysophosphatidylcholine
RAX2	YLR084C	S000004074	-1.86	3.555	2	703.321	K.N*SSLYADIYDNK.L	640	148.399	N-glycosylated protein involved in the maintenance of bud site selection during bipolar budding; localization requires Rax1p
YUR1	YJL139C	S000003675	-0.4	3.305	2	764.328	R.NSYDDYTLN*YTR.Q	77	147.628	Mannosyltransferase of the KTR1 family, involved in protein N-glycosylation; located in the Golgi apparatus
GAS3	YMR215W	S000004828	-0.8	4.155	2	1214.59	K.LN*STFEDAVIPLIFSEYGCNK#.N	269	147.336	Putative 1,3-beta-glucanosyltransferase, has similarity to Gas1p; localizes to the cell wall
YGP1	YNL160W	S000005104	-1.06	5.06	2	1009.51	R.LFN*SSSALN*ITELYNVAR.V	106	146.622	Cell wall-related secretory glycoprotein; induced by nutrient deprivation-associated growth arrest and upon entry into stationary phase; may be involved in adaptation prior to stationary phase entry; has similarity to Sps100p
RAX2	YLR084C	S000004074	0.25	5.011	2	813.893	R.N*LTM^IAN*ETLGSNAR.I	890	146.622	N-glycosylated protein involved in the maintenance of bud site selection during bipolar budding; localization requires Rax1p
KTR6	YPL053C	S000005974	-0.2	3.762	2	1123.53	K.SYGGN*ETTLGFMVPSYINHR.G	98	145.045	Probable mannosylphosphate transferase involved in the synthesis of core oligosaccharides in protein glycosylation pathway; member of the KRE2/MNT1 mannosyltransferase family
YJL171C	YJL171C	S000003707	6.77	3.722	2	1261.14	K.N*SSSIGYYDLPAIWLLNDHIAR.T	219	138.848	GPI-anchored cell wall protein of unknown function; induced in response to cell wall damaging agents and by mutations in genes involved in cell wall biogenesis; sequence similarity to YBR162C/TOS1, a covalently bound cell wall protein
PEP1	YBL017C	S000000113	-0.3	4.761	2	1010.48	R.AVATAMN*GSYLYITNDQGK.S	96	132.105	Type I transmembrane sorting receptor for multiple vacuolar hydrolases; cycles between the late-Golgi and prevacuolar endosome-like compartments
PST1	YDR055W	S000002462	0.79	5.534	2	1037.03	K.IN*SSLGFIN*NSISSLN*FTK#.L	242	123.857	Cell wall protein that contains a putative GPI-attachment site; secreted by regenerating protoplasts; up-regulated by activation of the cell integrity pathway, as mediated by Rlm1p; upregulated by cell wall damage via disruption of FKS1
RAX2	YLR084C	S000004074	1.28	5.188	2	1002.99	R.GIVN*VTMWNQQN*NTIMK#.T	516	122.185	N-glycosylated protein involved in the maintenance of bud site selection during bipolar budding; localization requires Rax1p
DCW1	YKL046C	S000001529	3.7	4.017	2	861.446	R.NQIMSWLN*TSAIAAAK.S	337	115.974	Putative mannosidase, GPI-anchored membrane protein required for cell wall biosynthesis in bud formation;homologous to Dfg5p
DCW1	YKL046C	S000001529	-0.3	5.694	3	1193.19	K.EFLN*ASQVFFHDGIVYEAACQGPNSCNTDQR.S	281	115.342	Putative mannosidase, GPI-anchored membrane protein required for cell wall biosynthesis in bud formation;homologous to Dfg5p
YOR389W	YOR389W	S000005916	0.02	2.706	3	517.252	K.EK#LN*LTDDGENER@.M	219	110.807	Putative protein of unknown function; expression regulated by copper levels
GPI17	YDR434W	S000002842	-3.14	6.308	3	1176.25	R.VPWSLQVLPYN*ETIEQMESEGNQFHVVTLK#.L	100	110.756	Transmembrane protein subunit of the glycosylphosphatidylinositol transamidase complex that adds GPIs to newly synthesized proteins; human PIG-Sp homolog
APE3	YBR286W	S000000490	0.65	5.599	3	897.764	R.FAWWAAEEEGLLGSNFYAYN*LTK#.E	371	109.943	Vacuolar aminopeptidase Y, processed to mature form by Prb1p
DSE4	YNR067C	S000005350	-0.52	2.658	2	550.771	K.LN*GTWAADNK#.D	886	109.529	Daughter cell-specific secreted protein with similarity to glucanases, degrades cell wall from the daughter side causing daughter to separate from mother
SUR7	YML052W	S000004516	0.18	5.328	2	1064.99	R.FYWVQGN*TTGIPNAGDETR.W	47	104.477	Putative integral membrane protein; component of eisosomes; associated with endocytosis, along with Pil1p and Lsp1p; sporulation and plasma membrane sphingolipid content are altered in mutants
YBR074W	YBR074W	S000000278	4.85	5.987	3	1161.56	R.TLIFNFNNNEEFGLLGASTYFDHSWSN*LTK.Y	217	99.844	Putative metalloprotease
AXL2	YIL140W	S000001402	0.92	3.282	3	670.353	K.NALK#LDPNEVFN*VTFDR@.S	163	99.228	Integral plasma membrane protein required for axial budding in haploid cells, localizes to the incipient bud site and bud neck; glycosylated by Pmt4p; potential Cdc28p substrate
EXG2	YDR261C	S000002669	0.45	3.079	2	982.459	K.EANLFPSPFDN*YTYFK#.A	480	99.228	Exo-1,3-beta-glucanase, involved in cell wall beta-glucan assembly; may be anchored to the plasma membrane via a glycosylphosphatidylinositol (GPI) anchor
DFG16	YOR030W	S000005556	-0.3	4.36	2	869.44	R.AYN*YTLNYPSFLIR.C	110	97.748	Probable multiple transmembrane protein, involved in diploid invasive and pseudohyphal growth upon nitrogen starvation; required for accumulation of processed Rim101p
PST1	YDR055W	S000002462	-0.39	2.864	2	569.762	K.SSN*FSCNALK#.A	329	97.748	Cell wall protein that contains a putative GPI-attachment site; secreted by regenerating protoplasts; up-regulated by activation of the cell integrity pathway, as mediated by Rlm1p; upregulated by cell wall damage via disruption of FKS1
RAX2	YLR084C	S000004074	-2.96	3.767	2	653.367	K.VGN*TTLNLFPVK.N	626	97.748	N-glycosylated protein involved in the maintenance of bud site selection during bipolar budding; localization requires Rax1p
ALG12	YNR030W	S000005313	-0.17	3.145	3	485.58	K.TTNHWELVN*TTK#.M	483	97.602	Alpha-1,6-mannosyltransferase localized to the ER; responsible for the addition of the alpha-1,6 mannose to dolichol-linked Man7GlcNAc2, acts in the dolichol pathway for N-glycosylation
PLB1	YMR008C	S000004610	-0.84	3.003	3	991.174	R.QFGSQGLN*LSFPYVPDVNTFVNLGLNK.K	459	97.565	Phospholipase B (lysophospholipase) involved in lipid metabolism, required for deacylation of phosphatidylcholine and phosphatidylethanolamine but not phosphatidylinositol
LRO1	YNR008W	S000005291	1.39	4.58	3	755.709	K.WAQGASPYNPAGIN*VTIVEM^K.H	594	94.163	Acyltransferase that catalyzes diacylglycerol esterification; one of several acyltransferases that contribute to triglyceride synthesis; putative homolog of human lecithin cholesterol acyltransferase
BAR1	YIL015W	S000001277	0.03	5.046	3	1298.3	K.FSGDLFTFPM^VNEYPTIVDAPATLAM^TIQGLGAQN*K.S	268	94.023	Aspartyl protease secreted into the periplasmic space of mating type a cells, helps cells find mating partners, cleaves and inactivates alpha factor allowing cells to recover from alpha-factor-induced cell cycle arrest
PST1	YDR055W	S000002462	2.6	2.675	2	1214.14	K.N*LSFSN*LSTIGGALVVAN*NTGLQK.I	268	91.9	Cell wall protein that contains a putative GPI-attachment site; secreted by regenerating protoplasts; up-regulated by activation of the cell integrity pathway, as mediated by Rlm1p; upregulated by cell wall damage via disruption of FKS1
MRL1	YPR079W	S000006283	-0.07	2.904	2	630.249	K.YEN*GSMCPNGK.D	178	87.265	Membrane protein with similarity to mammalian mannose-6-phosphate receptors, possibly functions as a sorting receptor in the delivery of vacuolar hydrolases
YPS7	YDR349C	S000002757	0.37	4.21	2	832.384	R.GNYYVN*STFGTPGQR.Q	59	85.529	Putative GPI-anchored aspartic protease, located in the cytoplasm and endoplasmic reticulum
PLB2	YMR006C	S000004608	-0.09	3.431	2	1103.1	K.N*LTDLEYIPPLVVYIPNTK.H	491	84.498	Phospholipase B (lysophospholipase) involved in phospholipid metabolism; displays transacylase activity in vitro; overproduction confers resistance to lysophosphatidylcholine
APE3	YBR286W	S000000490	4.02	3.651	2	1413.58	R.VFMDYDMMASPN*YEYEIYDANNK.E	393	82.387	Vacuolar aminopeptidase Y, processed to mature form by Prb1p
PST1	YDR055W	S000002462	0.29	2.591	2	1214.14	K.N*LSFSN*LSTIGGALVVAN*NTGLQK.I	263	82.279	Cell wall protein that contains a putative GPI-attachment site; secreted by regenerating protoplasts; up-regulated by activation of the cell integrity pathway, as mediated by Rlm1p; upregulated by cell wall damage via disruption of FKS1
ATH1	YPR026W	S000006230	0.14	4.386	3	1257.25	K.YN*SSLGLYETYN*LTDPDEFANHINNGAFTNAGIK.T	628	81.709	Acid trehalase required for utilization of extracellular trehalose
YFR018C	YFR018C	S000001914	-1.56	5.346	2	1040.5	K.EYNDLESNTVVSN*STLGVK#.I	179	81.692	Putative protein of unknown function
PLB2	YMR006C	S000004608	0.38	4.442	2	862.441	K.SIVNPGGSN*LTYTIER.W	193	81.692	Phospholipase B (lysophospholipase) involved in phospholipid metabolism; displays transacylase activity in vitro; overproduction confers resistance to lysophosphatidylcholine
PDI1	YCL043C	S000000548	0.75	3.501	3	1090.51	K.N*ITLAQIDCTENQDLCMEHNIPGFPSLK#.I	82	78.964	Protein disulfide isomerase, multifunctional protein resident in the endoplasmic reticulum lumen, essential for the formation of disulfide bonds in secretory and cell-surface proteins, unscrambles non-native disulfide bonds
GAS1	YMR307W	S000004924	0.19	4.028	2	1116.53	K.N*LSIPVFFSEYGCNEVTPR.L	253	78.616	Beta-1,3-glucanosyltransferase, required for cell wall assembly; localizes to the cell surface via a glycosylphosphatidylinositol (GPI) anchor
MID1	YNL291C	S000005235	-0.69	5.519	2	1380.64	K.NGPYLVSSQN*TSN*ATVTSN*STNPLER.T	285	78.156	N-glycosylated integral membrane protein of the ER membrane and plasma membrane, functions as a stretch-activated Ca2+-permeable cation channel required for Ca2+ influx stimulated by pheromone; interacts with Cch1p; forms an oligomer
ERO1	YML130C	S000004599	-0.53	3.213	2	749.918	K.AEIVPR@PSN*GTVNK#.W	491	76.733	Thiol oxidase required for oxidative protein folding in the endoplasmic reticulum
PMT6	YGR199W	S000003431	0.42	3.983	2	768.376	R.SSGLELDQN*GTLNGK.I	404	76.733	Protein O-mannosyltransferase, transfers mannose from dolichyl phosphate-D-mannose to protein serine/threonine residues of secretory proteins; reaction is essential for cell wall rigidity; member of a family of mannosyltransferases
ECM33	YBR078W	S000000282	-1.07	5.534	2	937.403	R.GGANFDSSSSN*FSCNALK#.K	328	76.733	GPI-anchored protein of unknown function, has a possible role in apical bud growth; GPI-anchoring on the plasma membrane crucial to function; phosphorylated in mitochondria; similar to Sps2p and Pst1p
TRE1	YPL176C	S000006097	-1.72	5.065	2	1133.51	R.LAGEEEFM^AYSNYPGN*VSLR.V	213	76.733	Plasma membrane protein that binds to Bsd2p and regulates ubiquitylation and vacuolar degradation of the metal transporter Smf1p; function is redundant with that of Tre2p; has similarity to transferrin receptors
YLR413W	YLR413W	S000004405	-0.63	4.618	2	946.5	K.ILNSAVN*M^TTITPEQLK.E	429	76.733	Putative protein of unknown function; YLR413W is not an essential gene
ATH1	YPR026W	S000006230	-0.88	4.979	3	1116.88	K.QITN*LTAGVPGDVAFSALDGN*NYTHWQPLDK.I	972	75.102	Acid trehalase required for utilization of extracellular trehalose
SLN1	YIL147C	S000001409	0.72	4.472	3	923.8	K.SVFN*DTTALEHSTIAIISAVYNSQGK.A	224	74.853	Histidine kinase osmosensor that regulates a MAP kinase cascade; transmembrane protein with an intracellular kinase domain that signals to Ypd1p and Ssk1p, thereby forming a phosphorelay system similar to bacterial two-component regulators
DDR48	YMR173W	S000004784	12.12	4.503	3	863.689	R.N*KN*SYGSSN*YGSSNNDDSYGSSNR@.G	403	73.616	DNA damage-responsive protein, expression is increased in response to heat-shock stress or treatments that produce DNA lesions; contains multiple repeats of the amino acid sequence NNNDSYGS
ADP1	YCR011C	S000000604	-0.4	3.003	2	629.287	K.VFSGCN*VTNEK.I	165	73.311	Putative ATP-dependent permease of the ABC transporter family of proteins
OSM1	YJR051W	S000003812	0.99	4.704	2	955.935	K.VYEN*YTNNINFYMSK#.N	355	73.311	Fumarate reductase, catalyzes the reduction of fumarate to succinate, required for the reoxidation of intracellular NADH under anaerobic conditions; mutations cause osmotic sensitivity
DAP2	YHR028C	S000001070	-0.46	4.59	3	1068.49	R.YM^HTPQENFDGYVESSVHN*VTALAQANR@.F	738	71.949	Dipeptidyl aminopeptidase, synthesized as a glycosylated precursor; localizes to the vacuolar membrane; similar to Ste13p
YLR001C	YLR001C	S000003991	4.53	5.402	3	935.153	K.FLELHLIPAN*VTQNLLDCN*GSISTK.L	679	71.067	Putative protein of unknown function; the authentic, non-tagged protein is detected in highly purified mitochondria in high-throughput studies; YLR001C is not an essential gene
PLB1	YMR008C	S000004610	1.12	3.265	3	745.072	R.N*LTDLEYIPPLIVYIPNSR.H	489	68.171	Phospholipase B (lysophospholipase) involved in lipid metabolism, required for deacylation of phosphatidylcholine and phosphatidylethanolamine but not phosphatidylinositol
SUC2	YIL162W	S000001424	-0.46	3.569	2	830.93	K.NPVLAAN*STQFRDPK.V	165	65.44	Invertase, sucrose hydrolyzing enzyme; a secreted, glycosylated form is regulated by glucose repression, and an intracellular, nonglycosylated enzyme is produced constitutively
MNN1	YER001W	S000000803	1.75	4.735	2	884.415	K.TLN*ATFPNYDPDNFK#.K	225	65.44	Alpha-1,3-mannosyltransferase, integral membrane glycoprotein of the Golgi complex, required for addition of alpha1,3-mannose linkages to N-linked and O-linked oligosaccharides, one of five S. cerevisiae proteins of the MNN1 family
GNT1	YOR320C	S000005847	1.9	4.648	2	1105.52	K.TLDNDGNDIPVGLN*DSVAYSK.Y	425	64.398	N-acetylglucosaminyltransferase capable of modification of N-linked glycans in the Golgi apparatus
YLR001C	YLR001C	S000003991	4.53	5.402	3	935.153	K.FLELHLIPAN*VTQNLLDCN*GSISTK.L	688	62.715	Putative protein of unknown function; the authentic, non-tagged protein is detected in highly purified mitochondria in high-throughput studies; YLR001C is not an essential gene
RNY1	YPL123C	S000006044	0.06	3.014	2	593.302	K.NDLN*ETELVK#.E	70	61.092	RNAse; member of the T(2) family of endoribonucleases
PLB1	YMR008C	S000004610	-7.97	5.327	2	1260.58	R.ATSN*FSDTSLLSTLFGSN*SSNMPK#.I	92	61.092	Phospholipase B (lysophospholipase) involved in lipid metabolism, required for deacylation of phosphatidylcholine and phosphatidylethanolamine but not phosphatidylinositol
DDR48	YMR173W	S000004784	11.23	4.979	3	863.688	R.N*KN*SYGSSN*YGSSNNDDSYGSSNR@.G	397	59.367	DNA damage-responsive protein, expression is increased in response to heat-shock stress or treatments that produce DNA lesions; contains multiple repeats of the amino acid sequence NNNDSYGS
TUL1	YKL034W	S000001517	0.91	5.02	2	1190.59	K.LSYQDMLNNPLQN*ATYPLPGK.D	79	59.298	Golgi-localized RING-finger ubiquitin ligase (E3), involved in ubiquitinating and sorting membrane proteins that contain polar transmembrane domains to multivesicular bodies for delivery to the vacuole for quality control purposes
DCW1	YKL046C	S000001529	1.03	3.869	2	996.488	K.VYEWM^VGVNLISN*GTYK.Y	225	59.298	Putative mannosidase, GPI-anchored membrane protein required for cell wall biosynthesis in bud formation;homologous to Dfg5p
DFG5	YMR238W	S000004851	0.94	5.672	2	1140.05	K.GDANAGMN*SSTTNVLQNNLNIK.K	417	59.298	Putative mannosidase, essential glycosylphosphatidylinositol (GPI)-anchored membrane protein required for cell wall biogenesis in bud formation, involved in filamentous growth, homologous to Dcw1p
PRY3	YJL078C	S000003614	0.37	2.591	3	817.71	K.YN*YSNPGFSESTGHFTQVVWK.S	101	59.298	Protein of unknown function, has similarity to Pry1p and Pry2p and to the plant PR-1 class of pathogen related proteins
ROT1	YMR200W	S000004813	0.61	4.394	3	1265.94	R.NPTCPM^ASLIYQHGTYN*ISEN*GTLVLNPIEVDGR.Q	107	58.167	Essential ER membrane protein; may be involved in protein folding; mutation causes defects in cell wall synthesis and in lysis of autophagic bodies, suppresses tor2 mutations, and is synthetically lethal with kar2-1 and with rot2 mutations
YCL045C	YCL045C	S000000550	3.57	3.464	3	1242.91	R.N*VLPFTIDEIQLDSNDHNAMVCVN*SSSNHWQK#.Y	83	56.916	Protein of unknown function; green fluorescent protein (GFP)-fusion protein localizes to the ER; interacts with Gal80p; YCL045C is not an essential gene
ECM33	YBR078W	S000000282	13.04	2.26	2	938.91	R.GGAN*FDSSSSN*FSCNALK#.K	321	56.122	GPI-anchored protein of unknown function, has a possible role in apical bud growth; GPI-anchoring on the plasma membrane crucial to function; phosphorylated in mitochondria; similar to Sps2p and Pst1p
MCD4	YKL165C	S000001648	1.3	4.415	3	1112.52	K.SNPVNFDSFFN*QSTHTYSFGSPDILPMFK#.D	138	56.026	Protein involved in glycosylphosphatidylinositol (GPI) anchor synthesis; multimembrane-spanning protein that localizes to the endoplasmic reticulum; highly conserved among eukaryotes
DDR48	YMR173W	S000004784	11.23	4.979	3	863.688	R.N*KN*SYGSSN*YGSSNNDDSYGSSNR@.G	395	55.776	DNA damage-responsive protein, expression is increased in response to heat-shock stress or treatments that produce DNA lesions; contains multiple repeats of the amino acid sequence NNNDSYGS
ROT1	YMR200W	S000004813	-0.48	4.578	3	1265.94	R.NPTCPM^ASLIYQHGTYN*ISEN*GTLVLNPIEVDGR.Q	103	55.461	Essential ER membrane protein; may be involved in protein folding; mutation causes defects in cell wall synthesis and in lysis of autophagic bodies, suppresses tor2 mutations, and is synthetically lethal with kar2-1 and with rot2 mutations
ECM33	YBR078W	S000000282	-0.88	5.72	3	1203.96	R.DVNSISFGSLQTVN*ASLGFIN*NTLPSLN*LTQLSK#.V	227	55.37	GPI-anchored protein of unknown function, has a possible role in apical bud growth; GPI-anchoring on the plasma membrane crucial to function; phosphorylated in mitochondria; similar to Sps2p and Pst1p
YNR048W	YNR048W	S000005331	1.46	2.913	2	902.937	K.TEYN*ASDIVPPPNWAK.L	240	53.71	Protein proposed to interact with phospholipid translocases, shares similarity to Cdc50p
ENO2	YHR174W	S000001217	0.4	4.278	2	982.512	K.GVM^N*AVNNVNNVIAAAFVK.A	64	53.534	Enolase II, a phosphopyruvate hydratase that catalyzes the conversion of 2-phosphoglycerate to phosphoenolpyruvate during glycolysis and the reverse reaction during gluconeogenesis; expression is induced in response to glucose
ATH1	YPR026W	S000006230	-0.06	4.997	2	993.433	K.YEN*STNPINSSESFEEK#.D	370	53.534	Acid trehalase required for utilization of extracellular trehalose
DAP2	YHR028C	S000001070	1.9	5.526	2	1148.6	K.TFIHNGQN*LTVESITASPDLK#.R	139	53.534	Dipeptidyl aminopeptidase, synthesized as a glycosylated precursor; localizes to the vacuolar membrane; similar to Ste13p
SUC2	YIL162W	S000001424	4.53	3.677	2	814.424	K.AEPILN*ISNAGPWSR.F	356	53.534	Invertase, sucrose hydrolyzing enzyme; a secreted, glycosylated form is regulated by glucose repression, and an intracellular, nonglycosylated enzyme is produced constitutively
DCW1	YKL046C	S000001529	-0.12	3.883	3	1243.6	K.VTSYQWTYNQGLLLAGSAYLYN*FTGSDLWHTR.T	265	52.391	Putative mannosidase, GPI-anchored membrane protein required for cell wall biosynthesis in bud formation;homologous to Dfg5p
GPI13	YLL031C	S000003954	1.55	4.263	2	787.882	R.HVLDNISSQN*ETSK.L	71	51.004	ER membrane localized phosphoryltransferase that adds phosphoethanolamine onto the third mannose residue of the glycosylphosphatidylinositol (GPI) anchor precursor; similar to human PIG-O protein
ERG3	YLR056W	S000004046	-0.89	5.221	2	1124.09	K.LLGLNSGFSN*STILQETLNSK#.N	45	51.004	C-5 sterol desaturase, catalyzes the introduction of a C-5(6) double bond into episterol, a precursor in ergosterol biosynthesis; mutants are viable, but cannot grow on non-fermentable carbon sources
CHS3	YBR023C	S000000227	-0.64	3.909	2	1192.01	K.SN*SSIPHDDDNNLAWYFPCK.L	303	49.312	Chitin synthase III, catalyzes the transfer of N-acetylglucosamine (GlcNAc) to chitin; required for synthesis of the majority of cell wall chitin, the chitin ring during bud emergence, and spore wall chitosan
ERO1	YML130C	S000004599	-0.16	3.148	2	597.305	R.YTIENIN*STK#.E	458	48.874	Thiol oxidase required for oxidative protein folding in the endoplasmic reticulum
BAR1	YIL015W	S000001277	-0.21	4.713	2	810.909	K.ISLAQANWN*ASEVSK.K	398	48.874	Aspartyl protease secreted into the periplasmic space of mating type a cells, helps cells find mating partners, cleaves and inactivates alpha factor allowing cells to recover from alpha-factor-induced cell cycle arrest
CWH41	YGL027C	S000002995	-0.51	3.654	2	664.36	K.NNLN*LTVYFVK.S	122	48.874	Processing alpha glucosidase I, ER type II integral membrane N-glycoprotein involved in assembly of cell wall beta 1,6 glucan and asparagine-linked protein glycosylation; also involved in ER protein quality control and sensing of ER stress
PLB2	YMR006C	S000004608	0.53	1.778	2	515.232	K.MNYN*VTER.L	524	48.874	Phospholipase B (lysophospholipase) involved in phospholipid metabolism; displays transacylase activity in vitro; overproduction confers resistance to lysophosphatidylcholine
YCR061W	YCR061W	S000000657	0.9	5.173	2	1176.54	R.LYWENYN*TTTYFTTQAGNR@.S	87	48.874	Protein of unknown function; green fluorescent protein (GFP)-fusion protein localizes to the cytoplasm in a punctate pattern; induced by treatment with 8-methoxypsoralen and UVA irradiation
YFR018C	YFR018C	S000001914	0.86	1.944	2	495.287	K.NLLLPFN*R.T	63	47.808	Putative protein of unknown function
ATH1	YPR026W	S000006230	-0.69	2.325	3	1140.26	K.ILDNVPVSPSEPYYEASR@N*QSLIEILPSN*R@.T	1157	46.873	Acid trehalase required for utilization of extracellular trehalose
OST1	YJL002C	S000003539	0	3.698	3	949.166	R.FSSN*ETLAIVYSHNAPLNQVVNLRR.D	217	45.598	Alpha subunit of the oligosaccharyltransferase complex of the ER lumen, which catalyzes asparagine-linked glycosylation of newly synthesized proteins
MNT3	YIL014W	S000001276	0.01	6.651	3	1149.53	R.SYDYCFLSGQLDPTAIFAN*STVNPHDLQNR.M	168	45.026	Alpha-1,3-mannosyltransferase, adds the fourth and fifth alpha-1,3-linked mannose residues to O-linked glycans during protein O-glycosylation
ATH1	YPR026W	S000006230	0.14	4.386	3	1257.25	K.YN*SSLGLYETYN*LTDPDEFANHINNGAFTNAGIK.T	638	44.753	Acid trehalase required for utilization of extracellular trehalose
VTH1	YIL173W	S000001435	0.11	4.995	3	910.795	R.LVHN*STGLYTTGDLGNIIM^YIPYR.S	479	44.612	Putative membrane glycoprotein with strong similarity to Vth2p and Pep1p/Vps10p, may be involved in vacuolar protein sorting
ROT2	YBR229C	S000000433	0.35	2.05	2	603.335	K.NNLQHN*ITLK#.D	907	44.278	Glucosidase II catalytic subunit required for normal cell wall synthesis; mutations in rot2 suppress tor2 mutations, and are synthetically lethal with rot1 mutations
MID1	YNL291C	S000005235	-0.69	5.519	2	1380.64	K.NGPYLVSSQN*TSN*ATVTSN*STNPLER.T	282	44.278	N-glycosylated integral membrane protein of the ER membrane and plasma membrane, functions as a stretch-activated Ca2+-permeable cation channel required for Ca2+ influx stimulated by pheromone; interacts with Cch1p; forms an oligomer
ECM33	YBR078W	S000000282	-0.09	3.46	3	1201.29	R.DVNSISFGSLQTVN*ASLGFIN*NTLPSLN*LTQLSK.V	241	43.066	GPI-anchored protein of unknown function, has a possible role in apical bud growth; GPI-anchoring on the plasma membrane crucial to function; phosphorylated in mitochondria; similar to Sps2p and Pst1p
TUL1	YKL034W	S000001517	3.36	4.935	3	1350.71	K.LIDDELNWPLGRPAN*LSSLPPINVVSGLLYSPDCGVR.L	356	42.869	Golgi-localized RING-finger ubiquitin ligase (E3), involved in ubiquitinating and sorting membrane proteins that contain polar transmembrane domains to multivesicular bodies for delivery to the vacuole for quality control purposes
PLB3	YOL011W	S000005371	-0.99	4.673	2	1063.48	K.NYCWN*GTLDTTPLPDVEK.D	588	42.098	Phospholipase B (lysophospholipase) involved in phospholipid metabolism; hydrolyzes phosphatidylinositol and phosphatidylserine and displays transacylase activity in vitro
SOP4	YJL192C	S000003728	0.08	3.56	2	736.89	K.NLEN*GTLQLNAFK#.N	115	42.098	ER-membrane protein; suppressor of pma1-7, deletion of SOP4 slows down the export of wild-type Pma1p and Pma1-7 from the ER
YCL045C	YCL045C	S000000550	-0.76	2.05	3	953.133	R.LSN*SSDNFSYDPLTGHINK#PQFQTK#.Q	574	40.978	Protein of unknown function; green fluorescent protein (GFP)-fusion protein localizes to the ER; interacts with Gal80p; YCL045C is not an essential gene
MNN1	YER001W	S000000803	-3.16	5.766	4	962.711	R.SPDFKPVENNYDN*STNVPQEIWFLDVSNTIHPK.W	383	38.371	Alpha-1,3-mannosyltransferase, integral membrane glycoprotein of the Golgi complex, required for addition of alpha1,3-mannose linkages to N-linked and O-linked oligosaccharides, one of five S. cerevisiae proteins of the MNN1 family
MMM1	YLL006W	S000003929	-0.27	3.248	2	680.803	K.QTSNN*SEFN*VSK.N	55	38.189	Mitochondrial outer membrane protein, component of the Mdm10-Mdm12-Mmm1 complex involved in import and assembly of outer membrane beta-barrel proteins
MRL1	YPR079W	S000006283	0.22	3.755	2	1161.05	K.AQISYIGNLHN*CSYFFEVR.S	215	37.54	Membrane protein with similarity to mammalian mannose-6-phosphate receptors, possibly functions as a sorting receptor in the delivery of vacuolar hydrolases
PEP1	YBL017C	S000000113	0.25	3.405	3	612.631	K.SNSN*GTSFVTLEHAVNR.N	1010	37.54	Type I transmembrane sorting receptor for multiple vacuolar hydrolases; cycles between the late-Golgi and prevacuolar endosome-like compartments
PLB2	YMR006C	S000004608	-0.19	3.663	2	762.418	K.YLGTN*VTNGK#PVNK#.D	309	37.54	Phospholipase B (lysophospholipase) involved in phospholipid metabolism; displays transacylase activity in vitro; overproduction confers resistance to lysophosphatidylcholine
RAX2	YLR084C	S000004074	2.27	5.059	2	1397.69	K.WTPYFISETTN*TSNYNPIIFINR.D	1098	37.54	N-glycosylated protein involved in the maintenance of bud site selection during bipolar budding; localization requires Rax1p
PHO3	YBR092C	S000000296	0.53	3.535	2	619.338	R.SVGANLFN*ATLK.L	315	37.54	Constitutively expressed acid phosphatase similar to Pho5p; brought to the cell surface by transport vesicles; hydrolyzes thiamin phosphates in the periplasmic space, increasing cellular thiamin uptake; expression is repressed by thiamin
ATH1	YPR026W	S000006230	-0.28	3.6	3	720.665	R.SLIHDQDINFYN*GSENER@.K	910	36.556	Acid trehalase required for utilization of extracellular trehalose
TDH3	YGR192C	S000003424	0.08	4.079	3	1063.55	R.IALSR@PNVEVVALN*DPFITNDYAAYMFK#.Y	32	35.356	Glyceraldehyde-3-phosphate dehydrogenase, isozyme 3, involved in glycolysis and gluconeogenesis; tetramer that catalyzes the reaction of glyceraldehyde-3-phosphate to 1,3 bis-phosphoglycerate; detected in the cytoplasm and cell-wall
MID1	YNL291C	S000005235	4.91	3.841	3	1138.25	K.NVM^ATGQQTIINSDSIYEWTPILSN*ITAGKK.D	70	34.768	N-glycosylated integral membrane protein of the ER membrane and plasma membrane, functions as a stretch-activated Ca2+-permeable cation channel required for Ca2+ influx stimulated by pheromone; interacts with Cch1p; forms an oligomer
ATH1	YPR026W	S000006230	-3.42	4.055	2	1314.61	K.WFNPQN*VTLDDVTNYSQN*LSMK#.D	259	34.073	Acid trehalase required for utilization of extracellular trehalose
KRE5	YOR336W	S000005863	0	2.153	2	573.287	K.N*STDNLTELK#.S	519	34.073	Protein required for beta-1,6 glucan biosynthesis; mutations result in aberrant morphology and severe growth defects
MCD4	YKL165C	S000001648	1.77	6.572	3	1267.31	R.TPLVAWGAGLNK#PVHNPFPVSDN*YTENWELSSIK#.R	312	33.657	Protein involved in glycosylphosphatidylinositol (GPI) anchor synthesis; multimembrane-spanning protein that localizes to the endoplasmic reticulum; highly conserved among eukaryotes
LEM3	YNL323W	S000005267	-1.69	4.251	3	1366.31	K.IYYPCGLIANSMFN*DTFPLQLTNVGDTSNNYSLTNK#.G	240	33.657	Membrane protein of the plasma membrane and ER, involved in translocation of phospholipids and alkylphosphocholine drugs across the plasma membrane
EXG2	YDR261C	S000002669	-0.16	2.007	3	616.655	K.TLGYN*TSLTLLDNHFK#.T	106	33.19	Exo-1,3-beta-glucanase, involved in cell wall beta-glucan assembly; may be anchored to the plasma membrane via a glycosylphosphatidylinositol (GPI) anchor
AXL2	YIL140W	S000001402	1.66	3.726	3	1066.22	K.LGSINLLDAPDWVALDN*ATISGSVPDELLGK.N	304	32.999	Integral plasma membrane protein required for axial budding in haploid cells, localizes to the incipient bud site and bud neck; glycosylated by Pmt4p; potential Cdc28p substrate
YKL100C	YKL100C	S000001583	-1.26	3.711	3	568.269	R.AFR@NN*SSSAN*QSASNK#.E	28	31.935	Putative protein of unknown function with similarity to a human minor histocompatibility antigen; YKL100C is not an essential gene
TUL1	YKL034W	S000001517	1.14	2.981	3	865.745	R.TEHNTFVN*MTYTDSFRN*ITGLK.L	52	31.769	Golgi-localized RING-finger ubiquitin ligase (E3), involved in ubiquitinating and sorting membrane proteins that contain polar transmembrane domains to multivesicular bodies for delivery to the vacuole for quality control purposes
PLB3	YOL011W	S000005371	0.76	3.925	2	866.91	K.QNADYN*TSLADIWGR@.A	221	31.275	Phospholipase B (lysophospholipase) involved in phospholipid metabolism; hydrolyzes phosphatidylinositol and phosphatidylserine and displays transacylase activity in vitro
PLB1	YMR008C	S000004610	-0.16	2.372	2	639.298	R.HSFNGN*QSTFK#.M	513	30.835	Phospholipase B (lysophospholipase) involved in lipid metabolism, required for deacylation of phosphatidylcholine and phosphatidylethanolamine but not phosphatidylinositol
YHR151C	YHR151C	S000001194	-0.1	3.006	3	689.668	R.RVLLN*NETSMVNEGN*NTR.L	89	30.835	Putative protein of unknown function; YHR151C is synthetically sick with cdc13-1
FET3	YMR058W	S000004662	0.16	5.485	3	1129.22	K.VPTLM^TVLSSGDQAN*NSEIYGSNTHTFILEK.D	381	30.835	Ferro-O2-oxidoreductase required for high-affinity iron uptake and involved in mediating resistance to copper ion toxicity, belongs to class of integral membrane multicopper oxidases
GAS1	YMR307W	S000004924	0.73	2.239	2	480.79	K.KLN*TNVIR.V	85	30.835	Beta-1,3-glucanosyltransferase, required for cell wall assembly; localizes to the cell surface via a glycosylphosphatidylinositol (GPI) anchor
MID1	YNL291C	S000005235	-0.69	5.519	2	1380.64	K.NGPYLVSSQN*TSN*ATVTSN*STNPLER.T	291	30.835	N-glycosylated integral membrane protein of the ER membrane and plasma membrane, functions as a stretch-activated Ca2+-permeable cation channel required for Ca2+ influx stimulated by pheromone; interacts with Cch1p; forms an oligomer
YJL171C	YJL171C	S000003707	1.53	2.08	3	841.093	K.NSSSIGYYDLPAIWLLN*DHIAR.T	235	29.638	GPI-anchored cell wall protein of unknown function; induced in response to cell wall damaging agents and by mutations in genes involved in cell wall biogenesis; sequence similarity to YBR162C/TOS1, a covalently bound cell wall protein
ROT1	YMR200W	S000004813	-1.45	2.828	3	1266.93	R.NPTCPM^ASLIYQHGTYN*ISEN*GTLVLN*PIEVDGR.Q	113	29.422	Essential ER membrane protein; may be involved in protein folding; mutation causes defects in cell wall synthesis and in lysis of autophagic bodies, suppresses tor2 mutations, and is synthetically lethal with kar2-1 and with rot2 mutations
GAS1	YMR307W	S000004924	0.81	3.669	3	1273.6	K.TVVDTFANYTN*VLGFFAGNEVTNNYTN*TDASAFVK#.A	152	28.934	Beta-1,3-glucanosyltransferase, required for cell wall assembly; localizes to the cell surface via a glycosylphosphatidylinositol (GPI) anchor
GAS1	YMR307W	S000004924	-0.38	5.423	3	1270.93	K.TVVDTFANYTN*VLGFFAGNEVTNN*YTNTDASAFVK.A	165	28.934	Beta-1,3-glucanosyltransferase, required for cell wall assembly; localizes to the cell surface via a glycosylphosphatidylinositol (GPI) anchor
PDI1	YCL043C	S000000548	-0.4	4.679	3	1088.84	K.N*ITLAQIDCTEN*QDLCMEHNIPGFPSLK.I	93	28.696	Protein disulfide isomerase, multifunctional protein resident in the endoplasmic reticulum lumen, essential for the formation of disulfide bonds in secretory and cell-surface proteins, unscrambles non-native disulfide bonds
ATH1	YPR026W	S000006230	-0.69	2.325	3	1140.26	K.ILDNVPVSPSEPYYEASR@N*QSLIEILPSN*R@.T	1147	27.672	Acid trehalase required for utilization of extracellular trehalose
DEF1	YKL054C	S000001537	-6.53	5.533	3	1208.52	K.NNYN*YYQTQNGQEQQSPNQGVAQHSEDSQQK#.Q	634	27.121	RNAPII degradation factor, forms a complex with Rad26p in chromatin, enables ubiquitination and proteolysis of RNAPII present in an elongation complex; mutant is deficient in Zip1p loading onto chromosomes during meiosis
EXG2	YDR261C	S000002669	0.34	4.943	2	1223.11	K.NLYIDN*ITFNDPYVSDGLQLK.Y	157	27.055	Exo-1,3-beta-glucanase, involved in cell wall beta-glucan assembly; may be anchored to the plasma membrane via a glycosylphosphatidylinositol (GPI) anchor
TUL1	YKL034W	S000001517	1.14	2.981	3	865.745	R.TEHNTFVN*MTYTDSFRN*ITGLK.L	61	26.359	Golgi-localized RING-finger ubiquitin ligase (E3), involved in ubiquitinating and sorting membrane proteins that contain polar transmembrane domains to multivesicular bodies for delivery to the vacuole for quality control purposes
EUG1	YDR518W	S000002926	1.14	5.715	3	1227.98	K.SLSIHLPN*TTEPILFDGNVDSLVGNSVALTQWLK.V	207	26.045	Protein disulfide isomerase of the endoplasmic reticulum lumen, function overlaps with that of Pdi1p; may interact with nascent polypeptides in the ER
PST1	YDR055W	S000002462	8.26	4.568	2	1034.05	K.INSSLGFIN*NSISSLNFTK#.L	235	24.437	Cell wall protein that contains a putative GPI-attachment site; secreted by regenerating protoplasts; up-regulated by activation of the cell integrity pathway, as mediated by Rlm1p; upregulated by cell wall damage via disruption of FKS1
PST1	YDR055W	S000002462	2.75	2.665	2	1216.65	K.NLSFSN*LSTIGGALVVAN*NTGLQK#.I	280	24.437	Cell wall protein that contains a putative GPI-attachment site; secreted by regenerating protoplasts; up-regulated by activation of the cell integrity pathway, as mediated by Rlm1p; upregulated by cell wall damage via disruption of FKS1
ENO2	YHR174W	S000001217	-0.5	4.75	2	986.518	K.GVM^NAVN*NVNNVIAAAFVK#.A	67	24.437	Enolase II, a phosphopyruvate hydratase that catalyzes the conversion of 2-phosphoglycerate to phosphoenolpyruvate during glycolysis and the reverse reaction during gluconeogenesis; expression is induced in response to glucose
HEH2	YDR458C	S000002866	-1.1	1.935	2	577.276	K.SN*NTNYIYR@.S	520	24.437	Inner nuclear membrane (INM) protein; contains helix-extension-helix (HEH) motif, nuclear localization signal sequence; targeting to the INM requires the Srp1p-Kap95p karyopherins and the Ran cycle
ENO2	YHR174W	S000001217	-1.12	4.606	2	978.52	K.GVMNAVNNVNN*VIAAAFVK#.A	71	24.437	Enolase II, a phosphopyruvate hydratase that catalyzes the conversion of 2-phosphoglycerate to phosphoenolpyruvate during glycolysis and the reverse reaction during gluconeogenesis; expression is induced in response to glucose
ENO2	YHR174W	S000001217	4.12	4.748	2	974.518	K.GVMNAVNN*VNNVIAAAFVK.A	68	24.437	Enolase II, a phosphopyruvate hydratase that catalyzes the conversion of 2-phosphoglycerate to phosphoenolpyruvate during glycolysis and the reverse reaction during gluconeogenesis; expression is induced in response to glucose
ENO2	YHR174W	S000001217	1.1	5.727	2	982.513	K.GVM^NAVNNVN*NVIAAAFVK.A	70	24.437	Enolase II, a phosphopyruvate hydratase that catalyzes the conversion of 2-phosphoglycerate to phosphoenolpyruvate during glycolysis and the reverse reaction during gluconeogenesis; expression is induced in response to glucose
RNY1	YPL123C	S000006044	1.04	3.553	2	785.368	K.FNNN*DTSLQISGEK.L	123	24.437	RNAse; member of the T(2) family of endoribonucleases
YJL171C	YJL171C	S000003707	0.32	1.978	3	826.358	K.DITNN*ESCTCEVGDRVWFSGK.N	51	24.437	GPI-anchored cell wall protein of unknown function; induced in response to cell wall damaging agents and by mutations in genes involved in cell wall biogenesis; sequence similarity to YBR162C/TOS1, a covalently bound cell wall protein
KRE5	YOR336W	S000005863	1.48	4.134	2	1488.66	K.YTPNYFADSVYSSVN*NTALESVCSER.I	644	24.437	Protein required for beta-1,6 glucan biosynthesis; mutations result in aberrant morphology and severe growth defects
ROT2	YBR229C	S000000433	2.27	4.317	2	967.969	R.GEYVETQFIFEN*NTLK.N	867	24.437	Glucosidase II catalytic subunit required for normal cell wall synthesis; mutations in rot2 suppress tor2 mutations, and are synthetically lethal with rot1 mutations
YLR001C	YLR001C	S000003991	-0.19	4.867	2	1108.99	K.SNSEGTSVSVN*NSDYSPISNR.I	291	24.437	Putative protein of unknown function; the authentic, non-tagged protein is detected in highly purified mitochondria in high-throughput studies; YLR001C is not an essential gene
FET5	YFL041W	S000001853	-1.52	3.875	2	794.904	K.YAFFNN*ITYVTPK#.V	364	24.437	Multicopper oxidase, integral membrane protein with similarity to Fet3p; may have a role in iron transport
LRO1	YNR008W	S000005291	-0.39	5.341	2	1060.97	K.SSSEDALNN*NTDTYGNFIR.F	439	24.437	Acyltransferase that catalyzes diacylglycerol esterification; one of several acyltransferases that contribute to triglyceride synthesis; putative homolog of human lecithin cholesterol acyltransferase
PDI1	YCL043C	S000000548	-0.62	4.604	2	794.856	K.NSDVN*NSIDYEGPR@.T	117	24.437	Protein disulfide isomerase, multifunctional protein resident in the endoplasmic reticulum lumen, essential for the formation of disulfide bonds in secretory and cell-surface proteins, unscrambles non-native disulfide bonds
YHR151C	YHR151C	S000001194	0.02	5.654	2	963.946	R.VLLNN*ETSM^VNEGN*NTR.L	80	24.437	Putative protein of unknown function; YHR151C is synthetically sick with cdc13-1
ECM33	YBR078W	S000000282	-10.48	3.655	2	1120.58	K.AAFSNLTTVGGGFIIAN*NTQLK.V	279	24.437	GPI-anchored protein of unknown function, has a possible role in apical bud growth; GPI-anchoring on the plasma membrane crucial to function; phosphorylated in mitochondria; similar to Sps2p and Pst1p
RAX2	YLR084C	S000004074	1.52	3.998	2	1014.98	R.GIVN*VTM^WNQQN*NTIM^K.T	524	24.437	N-glycosylated protein involved in the maintenance of bud site selection during bipolar budding; localization requires Rax1p
GAS1	YMR307W	S000004924	-1.31	1.706	2	823.379	K.FFYSNN*GSQFYIR.G	40	24.437	Beta-1,3-glucanosyltransferase, required for cell wall assembly; localizes to the cell surface via a glycosylphosphatidylinositol (GPI) anchor
PLB3	YOL011W	S000005371	0.11	3.615	2	764.403	K.YLGTN*VSNGVPLER@.G	313	24.243	Phospholipase B (lysophospholipase) involved in phospholipid metabolism; hydrolyzes phosphatidylinositol and phosphatidylserine and displays transacylase activity in vitro
PDC6	YGR087C	S000003319	3.48	4.677	2	1000.96	R.WAGNANELN*AAYAADGYAR.I	53	24.243	Minor isoform of pyruvate decarboxylase, decarboxylates pyruvate to acetaldehyde, involved in amino acid catabolism; transcription is glucose- and ethanol-dependent, and is strongly induced during sulfur limitation
VAR1	Q0140	S000007275	2.89	4.424	3	1120.78	K.FYYYNNDINNNNNNNN*NN*YYM^N*MMNK#.L	174	23.523	Mitochondrial ribosomal protein of the small subunit, mitochondrially-encoded; polymorphic in different strains due to variation in number of AAT (asparagine) codons; translated near the mitochondrial inner membrane
TPS2	YDR074W	S000002481	9	4.719	4	899.442	R.LEQQVNELVNSINSEYGN*LNFSPVQHYYMR@.I	412	22.529	Phosphatase subunit of the trehalose-6-phosphate synthase/phosphatase complex, which synthesizes the storage carbohydrate trehalose; expression is induced by stress conditions and repressed by the Ras-cAMP pathway
LHS1	YKL073W	S000001556	-1.35	2.796	2	1331.15	K.TSILTN*TTDSIPNN*FTIDLFENGK.L	481	22.237	Molecular chaperone of the endoplasmic reticulum lumen, involved in polypeptide translocation and folding; member of the Hsp70 family; localizes to the lumen of the ER; regulated by the unfolded protein response pathway
YBR139W	YBR139W	S000000343	0.42	4.553	3	1121.53	R.TFN*LTSVM^IGNGITDPLIQADYYEPM^ACGK#.G	242	21.528	Putative serine type carboxypeptidase with a role in phytochelatin synthesis; green fluorescent protein (GFP)-fusion protein localizes to the vacuole; expression induced by nitrogen limitation in a GLN3, GAT1-independent manner
GAS1	YMR307W	S000004924	-0.34	5.06	3	1270.93	K.TVVDTFAN*YTNVLGFFAGNEVTN*NYTNTDASAFVK.A	164	21.528	Beta-1,3-glucanosyltransferase, required for cell wall assembly; localizes to the cell surface via a glycosylphosphatidylinositol (GPI) anchor
GAS1	YMR307W	S000004924	0.04	3.759	3	1273.6	K.TVVDTFAN*YTNVLGFFAGNEVTNNYTN*TDASAFVK#.A	149	21.528	Beta-1,3-glucanosyltransferase, required for cell wall assembly; localizes to the cell surface via a glycosylphosphatidylinositol (GPI) anchor
GAS1	YMR307W	S000004924	0.08	2.277	3	1273.6	K.TVVDTFAN*YTNVLGFFAGNEVTNNYTN*TDASAFVK#.A	168	21.528	Beta-1,3-glucanosyltransferase, required for cell wall assembly; localizes to the cell surface via a glycosylphosphatidylinositol (GPI) anchor
ECM33	YBR078W	S000000282	-0.27	2.996	3	1201.29	R.DVNSISFGSLQTVN*ASLGFIN*N*TLPSLNLTQLSK.V	234	21.528	GPI-anchored protein of unknown function, has a possible role in apical bud growth; GPI-anchoring on the plasma membrane crucial to function; phosphorylated in mitochondria; similar to Sps2p and Pst1p
YBL081W	YBL081W	S000000177	0.76	1.899	3	1199.2	K.YNNTGSYYYYNN*NNN*SSVNPHNQAGLQSIN*R@.S	72	20.985	Non-essential protein of unknown function
PMT5	YDL093W	S000002251	0.84	3.228	3	996.838	K.WIIELAEHPNEN*VTSFQN*LTDGTIIK.L	386	20.287	Protein O-mannosyltransferase, transfers mannose residues from dolichyl phosphate-D-mannose to protein serine/threonine residues; acts in a complex with Pmt3p, can instead interact with Pmt2p in some conditions; target for new antifungals
MPD2	YOL088C	S000005448	0.4	2.687	3	800.696	K.SIEQYFDICNRN*DSYTMIK.Y	43	20.167	Member of the protein disulfide isomerase (PDI) family, exhibits chaperone activity; overexpression suppresses the lethality of a pdi1 deletion but does not complement all Pdi1p functions; undergoes oxidation by Ero1p
VAR1	Q0140	S000007275	2.77	4.336	3	1115.44	K.FYYYNNDINNNNNNNNNN*YYMN*MMN*K#.L	170	19.843	Mitochondrial ribosomal protein of the small subunit, mitochondrially-encoded; polymorphic in different strains due to variation in number of AAT (asparagine) codons; translated near the mitochondrial inner membrane
ERO1	YML130C	S000004599	0.05	2.254	3	505.907	K.TN*NSQSHVFDDLK#.M	468	19.843	Thiol oxidase required for oxidative protein folding in the endoplasmic reticulum
MNL1	YHR204W	S000001247	-0.1	2.472	3	610.285	K.FN*NSVYSSHLEICQK.K	517	19.843	Alpha mannosidase-like protein of the endoplasmic reticulum required for degradation of glycoproteins but not for processing of N-linked oligosaccharides
TDH3	YGR192C	S000003424	0.32	4.394	3	1058.87	R.IALSRPNVEVVALNDPFITN*DYAAYMFK.Y	38	19.777	Glyceraldehyde-3-phosphate dehydrogenase, isozyme 3, involved in glycolysis and gluconeogenesis; tetramer that catalyzes the reaction of glyceraldehyde-3-phosphate to 1,3 bis-phosphoglycerate; detected in the cytoplasm and cell-wall
CHS3	YBR023C	S000000227	-0.13	2.373	4	690.81	K.NQDGSSK#PN*FTVENYAGWNCHTSK#.E	332	19.607	Chitin synthase III, catalyzes the transfer of N-acetylglucosamine (GlcNAc) to chitin; required for synthesis of the majority of cell wall chitin, the chitin ring during bud emergence, and spore wall chitosan
YLR001C	YLR001C	S000003991	-0.65	3.478	3	959.503	K.TGHVQYLNELQN*FTLFAPINSAFIK#.G	68	18.805	Putative protein of unknown function; the authentic, non-tagged protein is detected in highly purified mitochondria in high-throughput studies; YLR001C is not an essential gene
GAS1	YMR307W	S000004924	-0.67	3.273	3	1270.93	K.TVVDTFANYTNVLGFFAGN*EVTNN*YTNTDASAFVK.A	160	17.739	Beta-1,3-glucanosyltransferase, required for cell wall assembly; localizes to the cell surface via a glycosylphosphatidylinositol (GPI) anchor
PST1	YDR055W	S000002462	11.96	1.71	2	1214.15	K.N*LSFSNLSTIGGALVVAN*N*TGLQK.I	281	17.512	Cell wall protein that contains a putative GPI-attachment site; secreted by regenerating protoplasts; up-regulated by activation of the cell integrity pathway, as mediated by Rlm1p; upregulated by cell wall damage via disruption of FKS1
ECM33	YBR078W	S000000282	-0.78	1.953	2	1122.09	K.AAFSNLTTVGGGFIIAN*N*TQLK.V	280	17.512	GPI-anchored protein of unknown function, has a possible role in apical bud growth; GPI-anchoring on the plasma membrane crucial to function; phosphorylated in mitochondria; similar to Sps2p and Pst1p
OSM1	YJR051W	S000003812	-3.2	2.466	2	953.418	K.VYENYTN*NIN*FYMSK.N	361	17.25	Fumarate reductase, catalyzes the reduction of fumarate to succinate, required for the reoxidation of intracellular NADH under anaerobic conditions; mutations cause osmotic sensitivity
GPI13	YLL031C	S000003954	1.83	2.16	2	911.903	K.ETSN*YN*IDNLGHDYR@.S	328	17.25	ER membrane localized phosphoryltransferase that adds phosphoethanolamine onto the third mannose residue of the glycosylphosphatidylinositol (GPI) anchor precursor; similar to human PIG-O protein
RNY1	YPL123C	S000006044	4.33	3.327	2	1139.49	K.GGDGYIGYSGN*YNWGGDTYPR@.R	396	17.009	RNAse; member of the T(2) family of endoribonucleases
PDC6	YGR087C	S000003319	0.1	4.068	2	1003.96	R.WAGN*ANELNAAYAADGYAR@.I	48	17.009	Minor isoform of pyruvate decarboxylase, decarboxylates pyruvate to acetaldehyde, involved in amino acid catabolism; transcription is glucose- and ethanol-dependent, and is strongly induced during sulfur limitation
OST1	YJL002C	S000003539	5.6	4.119	2	1076.02	R.FPIFGGWNYN*FTVGWTNK.L	336	17.009	Alpha subunit of the oligosaccharyltransferase complex of the ER lumen, which catalyzes asparagine-linked glycosylation of newly synthesized proteins
STT3	YGL022W	S000002990	-0.37	3.368	3	708.035	R.TTLVDNNTWN*NTHIAIVGK#.A	539	17.009	Subunit of the oligosaccharyltransferase complex of the ER lumen, which catalyzes asparagine-linked glycosylation of newly synthesized proteins; forms a subcomplex with Ost3p and Ost4p and is directly involved in catalysis
YND1	YER005W	S000000807	-0.12	4.381	2	965.43	R.EFCNSN*WTQILANSDK.G	371	17.009	Apyrase with wide substrate specificity, involved in preventing the inhibition of glycosylation by hydrolyzing nucleoside tri- and diphosphates which are inhibitors of glycotransferases; partially redundant with Gda1p
GAS5	YOL030W	S000005390	0.28	5.441	3	881.694	K.VSNPEGNGGYSTSNN*YSTCPDYEK.G	344	17.009	1,3-beta-glucanosyltransferase, has similarity to Gas1p; localizes to the cell wall
FET3	YMR058W	S000004662	0.97	5.223	3	1131.89	K.VPTLM^TVLSSGDQANN*SEIYGSNTHTFILEK#.D	382	17.009	Ferro-O2-oxidoreductase required for high-affinity iron uptake and involved in mediating resistance to copper ion toxicity, belongs to class of integral membrane multicopper oxidases
MNN1	YER001W	S000000803	-1.21	2.516	3	789.029	K.M^FPFINN*FTTETFHEM^VPK.I	254	17.009	Alpha-1,3-mannosyltransferase, integral membrane glycoprotein of the Golgi complex, required for addition of alpha1,3-mannose linkages to N-linked and O-linked oligosaccharides, one of five S. cerevisiae proteins of the MNN1 family
ECM33	YBR078W	S000000282	-0.27	2.996	3	1201.29	R.DVNSISFGSLQTVN*ASLGFIN*N*TLPSLNLTQLSK.V	235	16.964	GPI-anchored protein of unknown function, has a possible role in apical bud growth; GPI-anchoring on the plasma membrane crucial to function; phosphorylated in mitochondria; similar to Sps2p and Pst1p
DDR48	YMR173W	S000004784	-6.04	3.989	3	894.352	K.SSYGSNN*DDSYGSNNDDSYGSSNK#K#.K	185	16.198	DNA damage-responsive protein, expression is increased in response to heat-shock stress or treatments that produce DNA lesions; contains multiple repeats of the amino acid sequence NNNDSYGS
YBL081W	YBL081W	S000000177	0.76	1.899	3	1199.2	K.YNNTGSYYYYNN*NNN*SSVNPHNQAGLQSIN*R@.S	87	16.198	Non-essential protein of unknown function
ROT1	YMR200W	S000004813	-3.25	2.238	3	1267.94	R.N*PTCPM^ASLIYQHGTYNISEN*GTLVLNPIEVDGR@.Q	87	16.173	Essential ER membrane protein; may be involved in protein folding; mutation causes defects in cell wall synthesis and in lysis of autophagic bodies, suppresses tor2 mutations, and is synthetically lethal with kar2-1 and with rot2 mutations
YLR001C	YLR001C	S000003991	2.12	3.185	3	937.822	K.FLELHLIPAN*VTQN*LLDCNGSISTK#.L	683	16.144	Putative protein of unknown function; the authentic, non-tagged protein is detected in highly purified mitochondria in high-throughput studies; YLR001C is not an essential gene
GDA1	YEL042W	S000000768	-0.55	2.946	3	708.692	K.THQLSSPCLPPKVN*ATNEK.V	335	16.062	Guanosine diphosphatase located in the Golgi, involved in the transport of GDP-mannose into the Golgi lumen by converting GDP to GMP after mannose is transferred its substrate
DEF1	YKL054C	S000001537	-7.28	6.146	3	1208.52	K.NNYNYYQTQN*GQEQQSPNQGVAQHSEDSQQK#.Q	640	15.381	RNAPII degradation factor, forms a complex with Rad26p in chromatin, enables ubiquitination and proteolysis of RNAPII present in an elongation complex; mutant is deficient in Zip1p loading onto chromosomes during meiosis
PLB2	YMR006C	S000004608	0.15	3.684	2	1255.6	R.ATSN*FSDTSLLSTLFSSN*SSNVPK.I	94	14.966	Phospholipase B (lysophospholipase) involved in phospholipid metabolism; displays transacylase activity in vitro; overproduction confers resistance to lysophosphatidylcholine
DFG5	YMR238W	S000004851	-0.04	3.512	3	765.697	K.GDANAGM^NSSTTN*VLQNNLNIK.K	422	14.003	Putative mannosidase, essential glycosylphosphatidylinositol (GPI)-anchored membrane protein required for cell wall biogenesis in bud formation, involved in filamentous growth, homologous to Dcw1p
GPI13	YLL031C	S000003954	4.01	4.89	3	1284.6	R.FDFAIPVNESHSN*YNLNYHNNILSLYDSFASDK.D	105	13.38	ER membrane localized phosphoryltransferase that adds phosphoethanolamine onto the third mannose residue of the glycosylphosphatidylinositol (GPI) anchor precursor; similar to human PIG-O protein
YJL171C	YJL171C	S000003707	1.4	4.381	3	1185.47	R.TSQYPTN*ANCSCWASGCGEYDIFEAMN*GTEK.N	247	13.38	GPI-anchored cell wall protein of unknown function; induced in response to cell wall damaging agents and by mutations in genes involved in cell wall biogenesis; sequence similarity to YBR162C/TOS1, a covalently bound cell wall protein
YJL171C	YJL171C	S000003707	-0.48	3.619	3	1188.14	R.TSQYPTNAN*CSCWASGCGEYDIFEAMN*GTEK#.N	249	13.38	GPI-anchored cell wall protein of unknown function; induced in response to cell wall damaging agents and by mutations in genes involved in cell wall biogenesis; sequence similarity to YBR162C/TOS1, a covalently bound cell wall protein
GPI13	YLL031C	S000003954	1.83	2.16	2	911.903	K.ETSN*YN*IDNLGHDYR@.S	330	13.38	ER membrane localized phosphoryltransferase that adds phosphoethanolamine onto the third mannose residue of the glycosylphosphatidylinositol (GPI) anchor precursor; similar to human PIG-O protein
YUR1	YJL139C	S000003675	-1.15	2.396	3	1045.51	K.TQYALIPPEDWN*RPQWINDTLFEER.L	161	13.378	Mannosyltransferase of the KTR1 family, involved in protein N-glycosylation; located in the Golgi apparatus
LEM3	YNL323W	S000005267	-0.09	3.277	3	1367.31	K.IYYPCGLIAN*SMFNDTFPLQLTNVGDTSNNYSLTN*K#.G	261	13.378	Membrane protein of the plasma membrane and ER, involved in translocation of phospholipids and alkylphosphocholine drugs across the plasma membrane
DAP2	YHR028C	S000001070	0.9	3.091	4	655.288	K.SIPHHSNTPDYQEPNSN*YTNDGK.L	63	13.208	Dipeptidyl aminopeptidase, synthesized as a glycosylated precursor; localizes to the vacuolar membrane; similar to Ste13p
MNN1	YER001W	S000000803	-1.81	3.561	4	962.712	R.SPDFKPVENNYDNSTN*VPQEIWFLDVSNTIHPK.W	386	12.431	Alpha-1,3-mannosyltransferase, integral membrane glycoprotein of the Golgi complex, required for addition of alpha1,3-mannose linkages to N-linked and O-linked oligosaccharides, one of five S. cerevisiae proteins of the MNN1 family
PST1	YDR055W	S000002462	-2.93	1.721	2	1033.02	K.INSSLGFIN*N*SISSLN*FTK.L	236	12.431	Cell wall protein that contains a putative GPI-attachment site; secreted by regenerating protoplasts; up-regulated by activation of the cell integrity pathway, as mediated by Rlm1p; upregulated by cell wall damage via disruption of FKS1
LHS1	YKL073W	S000001556	-0.59	4.588	2	877.384	R.NNN*ETESTVINSADDK.T	844	12.218	Molecular chaperone of the endoplasmic reticulum lumen, involved in polypeptide translocation and folding; member of the Hsp70 family; localizes to the lumen of the ER; regulated by the unfolded protein response pathway
ATH1	YPR026W	S000006230	0.45	3.703	3	923.808	R.AALFNPLGVISPSLGN*HTLNYDPEAR.E	98	11.721	Acid trehalase required for utilization of extracellular trehalose
ECM33	YBR078W	S000000282	0.38	1.789	3	665.299	R.GGANFDSSSSNFSCN*ALKK.L	332	11.721	GPI-anchored protein of unknown function, has a possible role in apical bud growth; GPI-anchoring on the plasma membrane crucial to function; phosphorylated in mitochondria; similar to Sps2p and Pst1p
LEM3	YNL323W	S000005267	-0.09	2.294	3	1369.97	K.IYYPCGLIANSM^FNDTFPLQLTN*VGDTSNN*YSLTNK.G	249	11.714	Membrane protein of the plasma membrane and ER, involved in translocation of phospholipids and alkylphosphocholine drugs across the plasma membrane
RAX2	YLR084C	S000004074	0.74	2.529	3	1187.24	R.NQEWN*ITSLPGN*ASSISSVSAIYTDIESNTLNK.R	1031	11.22	N-glycosylated protein involved in the maintenance of bud site selection during bipolar budding; localization requires Rax1p
APE3	YBR286W	S000000490	1.16	2.139	3	895.093	R.FAWWAAEEEGLLGSN*FYAYNLTK.E	366	11.069	Vacuolar aminopeptidase Y, processed to mature form by Prb1p
LEM3	YNL323W	S000005267	-0.09	2.294	3	1369.97	K.IYYPCGLIANSM^FNDTFPLQLTN*VGDTSNN*YSLTNK.G	256	11.015	Membrane protein of the plasma membrane and ER, involved in translocation of phospholipids and alkylphosphocholine drugs across the plasma membrane
PMT6	YGR199W	S000003431	0.71	3.675	3	961.789	K.QMDSPNPVYSNEN*STILHPVSTFFR.L	481	11.015	Protein O-mannosyltransferase, transfers mannose from dolichyl phosphate-D-mannose to protein serine/threonine residues of secretory proteins; reaction is essential for cell wall rigidity; member of a family of mannosyltransferases
PDI1	YCL043C	S000000548	-1.2	2.902	3	1095.84	K.NITLAQIDCTENQDLCM^EHN*IPGFPSLK#.I	101	10.309	Protein disulfide isomerase, multifunctional protein resident in the endoplasmic reticulum lumen, essential for the formation of disulfide bonds in secretory and cell-surface proteins, unscrambles non-native disulfide bonds
PMT2	YAL023C	S000000021	1.86	3.469	3	1156.55	K.N*QALGGSLLHSHIQTYPDGSNQQQVTCYGYK.D	353	9.558	Protein O-mannosyltransferase, transfers mannose residues from dolichyl phosphate-D-mannose to protein serine/threonine residues; acts in a complex with Pmt1p, can instead interact with Pmt5p in some conditions; target for new antifungals
VAR1	Q0140	S000007275	2.77	4.336	3	1115.44	K.FYYYNNDINNNNNNNNNN*YYMN*MMN*K#.L	177	9.394	Mitochondrial ribosomal protein of the small subunit, mitochondrially-encoded; polymorphic in different strains due to variation in number of AAT (asparagine) codons; translated near the mitochondrial inner membrane
SEC66	YBR171W	S000000375	-0.9	4.905	2	1046.48	K.FSNN*GTFFETEEPIVETK.S	12	9.34	Non-essential subunit of Sec63 complex (Sec63p, Sec62p, Sec66p and Sec72p); with Sec61 complex, Kar2p/BiP and Lhs1p forms a channel competent for SRP-dependent and post-translational SRP-independent protein targeting and import into the ER
MCD4	YKL165C	S000001648	0.05	3.269	2	833.909	R.SLVMNN*ATYGISHTR.M	90	9.34	Protein involved in glycosylphosphatidylinositol (GPI) anchor synthesis; multimembrane-spanning protein that localizes to the endoplasmic reticulum; highly conserved among eukaryotes
FET3	YMR058W	S000004662	-5.74	3.249	2	972.971	K.NGVNYAFFNN*ITYTAPK#.V	359	9.34	Ferro-O2-oxidoreductase required for high-affinity iron uptake and involved in mediating resistance to copper ion toxicity, belongs to class of integral membrane multicopper oxidases
APE3	YBR286W	S000000490	3.93	1.986	2	1077.54	R.SDYVGFINN*GIPAGGIATGAEK.N	445	9.34	Vacuolar aminopeptidase Y, processed to mature form by Prb1p
LHS1	YKL073W	S000001556	-1.35	2.796	2	1331.15	K.TSILTN*TTDSIPNN*FTIDLFENGK.L	489	9.34	Molecular chaperone of the endoplasmic reticulum lumen, involved in polypeptide translocation and folding; member of the Hsp70 family; localizes to the lumen of the ER; regulated by the unfolded protein response pathway
YJL171C	YJL171C	S000003707	-0.51	4.212	2	919.933	K.QFAFYTSPGFTVN*NSR.S	99	9.34	GPI-anchored cell wall protein of unknown function; induced in response to cell wall damaging agents and by mutations in genes involved in cell wall biogenesis; sequence similarity to YBR162C/TOS1, a covalently bound cell wall protein
EGT2	YNL327W	S000005271	-2.49	2.502	2	681.348	K.STNN*FTISIPEK#.S	103	9.34	Glycosylphosphatidylinositol (GPI)-anchored cell wall endoglucanase required for proper cell separation after cytokinesis, expression is activated by Swi5p and tightly regulated in a cell cycle-dependent manner
PDI1	YCL043C	S000000548	-0.21	1.877	2	794.857	K.NSDVNN*SIDYEGPR@.T	118	9.34	Protein disulfide isomerase, multifunctional protein resident in the endoplasmic reticulum lumen, essential for the formation of disulfide bonds in secretory and cell-surface proteins, unscrambles non-native disulfide bonds
STT3	YGL022W	S000002990	3.2	4.589	2	1059.04	R.TTLVDN*NTWN*NTHIAIVGK.A	535	9.34	Subunit of the oligosaccharyltransferase complex of the ER lumen, which catalyzes asparagine-linked glycosylation of newly synthesized proteins; forms a subcomplex with Ost3p and Ost4p and is directly involved in catalysis
YOR389W	YOR389W	S000005916	-0.27	3.154	2	794.836	R.FEPASN*NSDEFGSGK.D	464	9.34	Putative protein of unknown function; expression regulated by copper levels
OSM1	YJR051W	S000003812	-2.22	3.358	2	953.419	K.VYEN*YTN*NINFYMSK.N	358	9.34	Fumarate reductase, catalyzes the reduction of fumarate to succinate, required for the reoxidation of intracellular NADH under anaerobic conditions; mutations cause osmotic sensitivity
GAS1	YMR307W	S000004924	0.47	1.966	2	823.381	K.FFYSN*NGSQFYIR.G	39	9.34	Beta-1,3-glucanosyltransferase, required for cell wall assembly; localizes to the cell surface via a glycosylphosphatidylinositol (GPI) anchor
MMM1	YLL006W	S000003929	-0.05	2.919	2	684.811	K.QTSN*NSEFN*VSK#.N	50	9.34	Mitochondrial outer membrane protein, component of the Mdm10-Mdm12-Mmm1 complex involved in import and assembly of outer membrane beta-barrel proteins
PHO3	YBR092C	S000000296	0.19	3.044	3	662.649	K.NN*LTAEYVPFMGNTFHK.S	356	9.34	Constitutively expressed acid phosphatase similar to Pho5p; brought to the cell surface by transport vesicles; hydrolyzes thiamin phosphates in the periplasmic space, increasing cellular thiamin uptake; expression is repressed by thiamin
YLR173W	YLR173W	S000004163	-0.19	3.553	2	692.282	K.DNMGSDLNN*DTGK.Y	115	9.34	Putative protein of unknown function
FET3	YMR058W	S000004662	1.06	2.683	3	1497.06	K.SFM^SVYNPTGAEPIPQNLIVN*N*TMNLTWEVQPDTTYLLR.I	194	9.296	Ferro-O2-oxidoreductase required for high-affinity iron uptake and involved in mediating resistance to copper ion toxicity, belongs to class of integral membrane multicopper oxidases
YBL081W	YBL081W	S000000177	-4.74	6.458	3	1195.19	K.YNNTGSYYYYN*NNNNSSVNPHNQAGLQSINR.S	68	9.296	Non-essential protein of unknown function
NGR1	YBR212W	S000000416	-9.65	1.606	4	1186.48	K.TASSMNTNPNTNMIMNSNM^NMNMN*VN*PVPYGMGNGANM^YDVSR@.M	615	9.133	RNA binding protein that negatively regulates growth rate; interacts with the 3' UTR of the mitochondrial porin (POR1) mRNA and enhances its degradation; overexpression impairs mitochondrial function; expressed in stationary phase
NGR1	YBR212W	S000000416	-9.65	1.606	4	1186.48	K.TASSMNTNPNTNMIMNSNM^NMNMN*VN*PVPYGMGNGANM^YDVSR@.M	617	9.133	RNA binding protein that negatively regulates growth rate; interacts with the 3' UTR of the mitochondrial porin (POR1) mRNA and enhances its degradation; overexpression impairs mitochondrial function; expressed in stationary phase
YBR139W	YBR139W	S000000343	-2.31	2.83	3	1113.52	R.TFNLTSVM^IGN*GITDPLIQADYYEPMACGK.G	250	8.913	Putative serine type carboxypeptidase with a role in phytochelatin synthesis; green fluorescent protein (GFP)-fusion protein localizes to the vacuole; expression induced by nitrogen limitation in a GLN3, GAT1-independent manner
PLB2	YMR006C	S000004608	9.08	1.62	3	1114.22	K.GMAFPYVPDVNTFLN*LGLTN*KPTFFGCDAK.N	480	8.745	Phospholipase B (lysophospholipase) involved in phospholipid metabolism; displays transacylase activity in vitro; overproduction confers resistance to lysophosphatidylcholine
LEM3	YNL323W	S000005267	-0.09	2.998	3	1367.31	K.IYYPCGLIAN*SMFNDTFPLQLTNVGDTSN*NYSLTNK#.G	255	8.594	Membrane protein of the plasma membrane and ER, involved in translocation of phospholipids and alkylphosphocholine drugs across the plasma membrane
DDR48	YMR173W	S000004784	2.38	5.3	3	1161.77	K.SSYGSN*NDDSYGSSNNNDSYGSNNDDSYGSSNK#.N	252	8.4	DNA damage-responsive protein, expression is increased in response to heat-shock stress or treatments that produce DNA lesions; contains multiple repeats of the amino acid sequence NNNDSYGS
YCL049C	YCL049C	S000000554	0.06	4.079	3	843.75	K.MLENEVQCPNER@N*ATTLEPLR@.L	264	7.971	Protein of unknown function; localizes to membrane fraction; YCL049C is not an essential gene;
FET3	YMR058W	S000004662	1.06	2.683	3	1497.06	K.SFM^SVYNPTGAEPIPQNLIVN*N*TMNLTWEVQPDTTYLLR.I	195	7.971	Ferro-O2-oxidoreductase required for high-affinity iron uptake and involved in mediating resistance to copper ion toxicity, belongs to class of integral membrane multicopper oxidases
YCL045C	YCL045C	S000000550	3.57	3.464	3	1242.91	R.N*VLPFTIDEIQLDSNDHNAMVCVN*SSSNHWQK#.Y	106	7.971	Protein of unknown function; green fluorescent protein (GFP)-fusion protein localizes to the ER; interacts with Gal80p; YCL045C is not an essential gene
LEM3	YNL323W	S000005267	-0.09	3.277	3	1367.31	K.IYYPCGLIAN*SMFNDTFPLQLTNVGDTSNNYSLTN*K#.G	236	7.971	Membrane protein of the plasma membrane and ER, involved in translocation of phospholipids and alkylphosphocholine drugs across the plasma membrane
DDR48	YMR173W	S000004784	0.97	5.361	3	1407.52	K.SSYGSSNNDSYGSNNDDSYGSNNN*DSYGSNNDDSYGSSNK#.K	228	7.71	DNA damage-responsive protein, expression is increased in response to heat-shock stress or treatments that produce DNA lesions; contains multiple repeats of the amino acid sequence NNNDSYGS
ATH1	YPR026W	S000006230	-3.28	3.345	3	1119.54	K.QITN*LTAGVPGDVAFSALDGNN*YTHWQPLDK#.I	990	7.71	Acid trehalase required for utilization of extracellular trehalose
ATH1	YPR026W	S000006230	-0.77	3.229	3	1116.88	K.QITN*LTAGVPGDVAFSALDGN*NYTHWQPLDK.I	989	7.71	Acid trehalase required for utilization of extracellular trehalose
EUG1	YDR518W	S000002926	0.63	5.603	3	1412.75	K.ILIAEVDSGANDILSFPVTGYPTIALYPAGN*NSKPIIFNK.I	462	7.71	Protein disulfide isomerase of the endoplasmic reticulum lumen, function overlaps with that of Pdi1p; may interact with nascent polypeptides in the ER
LHS1	YKL073W	S000001556	0.43	3.366	3	666.303	K.SRN*NNETESTVINSADDK.T	842	7.71	Molecular chaperone of the endoplasmic reticulum lumen, involved in polypeptide translocation and folding; member of the Hsp70 family; localizes to the lumen of the ER; regulated by the unfolded protein response pathway
PLB3	YOL011W	S000005371	-1.4	3.626	4	1148.05	K.KPTFFGCDAN*NLTDLQYIPPLVVYLPNAEYSFNSN*QSAFK.L	519	7.413	Phospholipase B (lysophospholipase) involved in phospholipid metabolism; hydrolyzes phosphatidylinositol and phosphatidylserine and displays transacylase activity in vitro
PLB2	YMR006C	S000004608	9.08	1.62	3	1114.22	K.GMAFPYVPDVNTFLN*LGLTN*KPTFFGCDAK.N	475	6.91	Phospholipase B (lysophospholipase) involved in phospholipid metabolism; displays transacylase activity in vitro; overproduction confers resistance to lysophosphatidylcholine
PST1	YDR055W	S000002462	-1.9	4.358	3	1020.19	K.ITFDDLVWAN*NISLTDVHSVSFANLQK#.I	209	6.591	Cell wall protein that contains a putative GPI-attachment site; secreted by regenerating protoplasts; up-regulated by activation of the cell integrity pathway, as mediated by Rlm1p; upregulated by cell wall damage via disruption of FKS1
PST1	YDR055W	S000002462	-1.58	3.624	3	1020.19	K.ITFDDLVWANN*ISLTDVHSVSFANLQK#.I	210	6.591	Cell wall protein that contains a putative GPI-attachment site; secreted by regenerating protoplasts; up-regulated by activation of the cell integrity pathway, as mediated by Rlm1p; upregulated by cell wall damage via disruption of FKS1
KRE5	YOR336W	S000005863	0.69	4.344	3	775.36	R.MDLSEFFR@PNN*LTM^FEDGK#.S	870	6.591	Protein required for beta-1,6 glucan biosynthesis; mutations result in aberrant morphology and severe growth defects
MSC1	YML128C	S000004597	-0.86	3.611	2	814.366	K.YFDNSN*WSLDDIK#.G	395	6.591	Protein of unknown function; mutant is defective in directing meiotic recombination events to homologous chromatids; the authentic, non-tagged protein is detected in highly purified mitochondria and is phosphorylated
STT3	YGL022W	S000002990	0.14	3.099	3	705.364	R.TTLVDNNTWNN*THIAIVGK.A	540	6.591	Subunit of the oligosaccharyltransferase complex of the ER lumen, which catalyzes asparagine-linked glycosylation of newly synthesized proteins; forms a subcomplex with Ost3p and Ost4p and is directly involved in catalysis
YLR001C	YLR001C	S000003991	-0.15	4.045	3	739.664	K.SNSEGTSVSVNN*SDYSPISNR.I	292	6.591	Putative protein of unknown function; the authentic, non-tagged protein is detected in highly purified mitochondria in high-throughput studies; YLR001C is not an essential gene
LRO1	YNR008W	S000005291	1.18	3.002	3	855.732	K.SSSEDALNNN*TDTYGNFIR@FER@.N	440	6.591	Acyltransferase that catalyzes diacylglycerol esterification; one of several acyltransferases that contribute to triglyceride synthesis; putative homolog of human lecithin cholesterol acyltransferase
ATH1	YPR026W	S000006230	-3.42	4.055	2	1314.61	K.WFNPQN*VTLDDVTNYSQN*LSMK#.D	247	6.591	Acid trehalase required for utilization of extracellular trehalose
PTC7	YHR076W	S000001118	-0.69	5.758	3	877.036	K.SGYQSNN*SHGDAYSSGSQSGPFTYK.T	44	6.591	Mitochondrially localized type 2C protein phosphatase; expression induced by growth on ethanol and by sustained osmotic stress; possible role in carbon source utilization in low oxygen environments
FET3	YMR058W	S000004662	0.51	3.024	3	646.316	K.NGVNYAFFN*NITYTAPK.V	358	6.591	Ferro-O2-oxidoreductase required for high-affinity iron uptake and involved in mediating resistance to copper ion toxicity, belongs to class of integral membrane multicopper oxidases
YBL081W	YBL081W	S000000177	-5.31	6.607	3	1195.19	K.YNNTGSYYYYNNNN*NSSVNPHNQAGLQSINR.S	71	6.591	Non-essential protein of unknown function
STT3	YGL022W	S000002990	0.87	3.043	3	706.36	R.TTLVDNN*TWN*NTHIAIVGK.A	536	6.591	Subunit of the oligosaccharyltransferase complex of the ER lumen, which catalyzes asparagine-linked glycosylation of newly synthesized proteins; forms a subcomplex with Ost3p and Ost4p and is directly involved in catalysis
PLB2	YMR006C	S000004608	0.6	2.378	2	618.299	K.HSFNGN*QSTLK.M	515	6.591	Phospholipase B (lysophospholipase) involved in phospholipid metabolism; displays transacylase activity in vitro; overproduction confers resistance to lysophosphatidylcholine
APE3	YBR286W	S000000490	0.07	1.851	3	1090.84	R.FAWWAAEEEGLLGSNFYAYNLTKEEN*SK.I	377	6.454	Vacuolar aminopeptidase Y, processed to mature form by Prb1p
PDI1	YCL043C	S000000548	0.69	1.324	2	863.88	K.IDADFNATFYSM^AN*K.H	182	6.039	Protein disulfide isomerase, multifunctional protein resident in the endoplasmic reticulum lumen, essential for the formation of disulfide bonds in secretory and cell-surface proteins, unscrambles non-native disulfide bonds
PLB1	YMR008C	S000004610	-0.8	2.255	3	1124.14	K.QQNLN*ATLPSECSQCFTNYCWN*GTIDSR.S	582	6.039	Phospholipase B (lysophospholipase) involved in lipid metabolism, required for deacylation of phosphatidylcholine and phosphatidylethanolamine but not phosphatidylinositol
YLR001C	YLR001C	S000003991	0.33	2.491	3	956.832	K.TGHVQYLN*ELQNFTLFAPINSAFIK.G	64	6.039	Putative protein of unknown function; the authentic, non-tagged protein is detected in highly purified mitochondria in high-throughput studies; YLR001C is not an essential gene
CPS1	YJL172W	S000003708	8.99	5.838	4	1135.84	K.VNELGLLYTWEGSDPDLKPLLLM^AHQDVVPVN*NETLSSWK.F	175	5.75	Vacuolar carboxypeptidase yscS; expression is induced under low-nitrogen conditions
CPS1	YJL172W	S000003708	-1.25	4.465	4	1135.83	K.VNELGLLYTWEGSDPDLK#PLLLMAHQDVVPVNN*ETLSSWK#.F	176	5.75	Vacuolar carboxypeptidase yscS; expression is induced under low-nitrogen conditions
SGO1	YOR073W	S000005599	-0.01	2.172	3	1046.78	K.SSKGTSNNNNNYNNFDNN*NSN*INN*VNNK.S	546	5.464	Component of the spindle checkpoint, involved in sensing lack of tension on mitotic chromosomes; protects centromeric Rec8p at meiosis I; required for accurate chromosomal segregation at meiosis II and for mitotic chromosome stability
YLR001C	YLR001C	S000003991	-3.95	3.556	3	1188.26	K.IFSDFISSFSN*YNAYTNSSTVLVPLDVNFR@K#.F	194	5.085	Putative protein of unknown function; the authentic, non-tagged protein is detected in highly purified mitochondria in high-throughput studies; YLR001C is not an essential gene
SGO1	YOR073W	S000005599	-0.01	2.172	3	1046.78	K.SSKGTSNNNNNYNNFDNN*NSN*INN*VNNK.S	549	5.085	Component of the spindle checkpoint, involved in sensing lack of tension on mitotic chromosomes; protects centromeric Rec8p at meiosis I; required for accurate chromosomal segregation at meiosis II and for mitotic chromosome stability
RAX2	YLR084C	S000004074	0.12	2.893	3	934.132	K.WTPYFISETTNTSNYN*PIIFINR@.D	1103	4.085	N-glycosylated protein involved in the maintenance of bud site selection during bipolar budding; localization requires Rax1p
PMT5	YDL093W	S000002251	0.84	3.228	3	996.838	K.WIIELAEHPNEN*VTSFQN*LTDGTIIK.L	380	4.085	Protein O-mannosyltransferase, transfers mannose residues from dolichyl phosphate-D-mannose to protein serine/threonine residues; acts in a complex with Pmt3p, can instead interact with Pmt2p in some conditions; target for new antifungals
EUG1	YDR518W	S000002926	5.47	4.15	4	1059.82	K.ILIAEVDSGANDILSFPVTGYPTIALYPAGNNSKPIIFN*K.I	470	3.494	Protein disulfide isomerase of the endoplasmic reticulum lumen, function overlaps with that of Pdi1p; may interact with nascent polypeptides in the ER
GDA1	YEL042W	S000000768	0.02	2.998	3	708.693	K.THQLSSPCLPPKVNATN*EK.V	338	3.065	Guanosine diphosphatase located in the Golgi, involved in the transport of GDP-mannose into the Golgi lumen by converting GDP to GMP after mannose is transferred its substrate
ECM33	YBR078W	S000000282	0.51	2.054	3	1203.96	R.DVN*SISFGSLQTVNASLGFINN*TLPSLN*LTQLSK#.V	216	2.949	GPI-anchored protein of unknown function, has a possible role in apical bud growth; GPI-anchoring on the plasma membrane crucial to function; phosphorylated in mitochondria; similar to Sps2p and Pst1p
YGP1	YNL160W	S000005104	1.07	2.131	2	1012.53	R.LFN*SSSALNITELYN*VAR@.V	112	2.806	Cell wall-related secretory glycoprotein; induced by nutrient deprivation-associated growth arrest and upon entry into stationary phase; may be involved in adaptation prior to stationary phase entry; has similarity to Sps100p
OST1	YJL002C	S000003539	0.03	3.207	2	1076.01	R.FPIFGGWNYNFTVGWTN*K.L	343	2.576	Alpha subunit of the oligosaccharyltransferase complex of the ER lumen, which catalyzes asparagine-linked glycosylation of newly synthesized proteins
GPI13	YLL031C	S000003954	3.27	3.398	4	963.701	R.FDFAIPVNESHSNYNLNYHNN*ILSLYDSFASDK.D	113	2.499	ER membrane localized phosphoryltransferase that adds phosphoethanolamine onto the third mannose residue of the glycosylphosphatidylinositol (GPI) anchor precursor; similar to human PIG-O protein
MCD4	YKL165C	S000001648	1.99	4.115	4	946.73	R.TPLVAWGAGLNKPVHN*PFPVSDNYTENWELSSIK.R	305	1.908	Protein involved in glycosylphosphatidylinositol (GPI) anchor synthesis; multimembrane-spanning protein that localizes to the endoplasmic reticulum; highly conserved among eukaryotes
KRE5	YOR336W	S000005863	0.47	1.857	2	1488.66	K.YTPN*YFADSVYSSVNNTALESVCSER.I	633	1.603	Protein required for beta-1,6 glucan biosynthesis; mutations result in aberrant morphology and severe growth defects
MNN1	YER001W	S000000803	-1.56	3.333	4	966.719	R.SPDFK#PVEN*NYDNSTNVPQEIWFLDVSNTIHPK#.W	379	1.488	Alpha-1,3-mannosyltransferase, integral membrane glycoprotein of the Golgi complex, required for addition of alpha1,3-mannose linkages to N-linked and O-linked oligosaccharides, one of five S. cerevisiae proteins of the MNN1 family
PHO3	YBR092C	S000000296	1.83	1.614	2	993.471	K.NNLTAEYVPFMGN*TFHK.S	367	1.383	Constitutively expressed acid phosphatase similar to Pho5p; brought to the cell surface by transport vesicles; hydrolyzes thiamin phosphates in the periplasmic space, increasing cellular thiamin uptake; expression is repressed by thiamin
GPI13	YLL031C	S000003954	2.82	3.674	4	963.701	R.FDFAIPVNESHSNYNLN*YHNNILSLYDSFASDK.D	109	1.187	ER membrane localized phosphoryltransferase that adds phosphoethanolamine onto the third mannose residue of the glycosylphosphatidylinositol (GPI) anchor precursor; similar to human PIG-O protein
PMT2	YAL023C	S000000021	1.74	3.515	4	867.661	K.NQALGGSLLHSHIQTYPDGSN*QQQVTCYGYK.D	373	0.919	Protein O-mannosyltransferase, transfers mannose residues from dolichyl phosphate-D-mannose to protein serine/threonine residues; acts in a complex with Pmt1p, can instead interact with Pmt5p in some conditions; target for new antifungals
ECM33	YBR078W	S000000282	15.97	1.341	2	606.829	K.VNVFN*INNNR@.Y	167	0	GPI-anchored protein of unknown function, has a possible role in apical bud growth; GPI-anchoring on the plasma membrane crucial to function; phosphorylated in mitochondria; similar to Sps2p and Pst1p
DDR48	YMR173W	S000004784	7.99	4.48	3	1447.56	K.SSYGSSNNDSYGSNN*DDSYGSNNNDSYGSNNDDSYGSSNKK.K	219	0	DNA damage-responsive protein, expression is increased in response to heat-shock stress or treatments that produce DNA lesions; contains multiple repeats of the amino acid sequence NNNDSYGS
NGR1	YBR212W	S000000416	4.86	7.512	4	1251.8	R.LFLHQQQQQQQQQQQDGNFSM^EQMAHNN*YYNYNNYDYHR@.N	508	0	RNA binding protein that negatively regulates growth rate; interacts with the 3' UTR of the mitochondrial porin (POR1) mRNA and enhances its degradation; overexpression impairs mitochondrial function; expressed in stationary phase
VAR1	Q0140	S000007275	2.89	4.424	3	1120.78	K.FYYYNNDINNNNNNNN*NN*YYM^N*MMNK#.L	168	0	Mitochondrial ribosomal protein of the small subunit, mitochondrially-encoded; polymorphic in different strains due to variation in number of AAT (asparagine) codons; translated near the mitochondrial inner membrane
ERO1	YML130C	S000004599	1.01	2.545	3	551.277	K.K#TNN*SQSHVFDDLK#.M	469	0	Thiol oxidase required for oxidative protein folding in the endoplasmic reticulum
YKL100C	YKL100C	S000001583	-0.94	2.803	3	562.595	R.AFRN*NSSSANQSASNK.E	22	0	Putative protein of unknown function with similarity to a human minor histocompatibility antigen; YKL100C is not an essential gene
PLB3	YOL011W	S000005371	-1.4	3.626	4	1148.05	K.KPTFFGCDAN*NLTDLQYIPPLVVYLPNAEYSFNSN*QSAFK.L	494	0	Phospholipase B (lysophospholipase) involved in phospholipid metabolism; hydrolyzes phosphatidylinositol and phosphatidylserine and displays transacylase activity in vitro
CHS3	YBR023C	S000000227	0.3	3.72	3	797.683	K.SNSSIPHDDDNN*LAWYFPCK#.L	313	0	Chitin synthase III, catalyzes the transfer of N-acetylglucosamine (GlcNAc) to chitin; required for synthesis of the majority of cell wall chitin, the chitin ring during bud emergence, and spore wall chitosan
EGT2	YNL327W	S000005271	-2.83	3.372	2	834.898	K.TNN*TAWFTVDLPMR.T	176	0	Glycosylphosphatidylinositol (GPI)-anchored cell wall endoglucanase required for proper cell separation after cytokinesis, expression is activated by Swi5p and tightly regulated in a cell cycle-dependent manner
KRE5	YOR336W	S000005863	-0.95	4.199	3	992.774	K.YTPNYFADSVYSSVNN*TALESVCSER.I	645	0	Protein required for beta-1,6 glucan biosynthesis; mutations result in aberrant morphology and severe growth defects
OST1	YJL002C	S000003539	0.09	2.431	2	1076.01	R.FPIFGGWN*YNFTVGWTNK.L	334	0	Alpha subunit of the oligosaccharyltransferase complex of the ER lumen, which catalyzes asparagine-linked glycosylation of newly synthesized proteins
ROT2	YBR229C	S000000433	-1.16	4.617	2	971.973	R.GEYVETQFIFENN*TLK#.N	868	0	Glucosidase II catalytic subunit required for normal cell wall synthesis; mutations in rot2 suppress tor2 mutations, and are synthetically lethal with rot1 mutations
YKL100C	YKL100C	S000001583	-1.26	3.711	3	568.269	R.AFR@NN*SSSAN*QSASNK#.E	23	0	Putative protein of unknown function with similarity to a human minor histocompatibility antigen; YKL100C is not an essential gene
YBL081W	YBL081W	S000000177	0.76	1.899	3	1199.2	K.YNNTGSYYYYNN*NNN*SSVNPHNQAGLQSIN*R@.S	69	0	Non-essential protein of unknown function
CPR5	YDR304C	S000002712	-0.17	4.108	2	1143.04	K.NTN*GSQFFITTVPCPWLDGK.H	139	0	Peptidyl-prolyl cis-trans isomerase (cyclophilin) of the endoplasmic reticulum, catalyzes the cis-trans isomerization of peptide bonds N-terminal to proline residues; transcriptionally induced in response to unfolded proteins in the ER
STT3	YGL022W	S000002990	0.69	2.206	2	575.787	K.YLVNN*SFYK.F	61	0	Subunit of the oligosaccharyltransferase complex of the ER lumen, which catalyzes asparagine-linked glycosylation of newly synthesized proteins; forms a subcomplex with Ost3p and Ost4p and is directly involved in catalysis
YHR151C	YHR151C	S000001194	-0.1	3.006	3	689.668	R.RVLLN*NETSMVNEGN*NTR.L	79	0	Putative protein of unknown function; YHR151C is synthetically sick with cdc13-1
PLB1	YMR008C	S000004610	-0.8	2.255	3	1124.14	K.QQNLN*ATLPSECSQCFTNYCWN*GTIDSR.S	565	0	Phospholipase B (lysophospholipase) involved in lipid metabolism, required for deacylation of phosphatidylcholine and phosphatidylethanolamine but not phosphatidylinositol
PLB1	YMR008C	S000004610	-1.04	2.43	2	1260.59	R.ATSN*FSDTSLLSTLFGSNSSN*MPK#.I	95	0	Phospholipase B (lysophospholipase) involved in lipid metabolism, required for deacylation of phosphatidylcholine and phosphatidylethanolamine but not phosphatidylinositol
MMM1	YLL006W	S000003929	0.56	3.123	2	680.804	K.QTSNN*SEFN*VSK.N	51	0	Mitochondrial outer membrane protein, component of the Mdm10-Mdm12-Mmm1 complex involved in import and assembly of outer membrane beta-barrel proteins
PMT5	YDL093W	S000002251	0.26	3.278	3	999.509	K.WIIELAEHPN*ENVTSFQN*LTDGTIIK#.L	378	0	Protein O-mannosyltransferase, transfers mannose residues from dolichyl phosphate-D-mannose to protein serine/threonine residues; acts in a complex with Pmt3p, can instead interact with Pmt2p in some conditions; target for new antifungals
RAX2	YLR084C	S000004074	0.74	2.529	3	1187.24	R.NQEWN*ITSLPGN*ASSISSVSAIYTDIESNTLNK.R	1024	0	N-glycosylated protein involved in the maintenance of bud site selection during bipolar budding; localization requires Rax1p
YJL171C	YJL171C	S000003707	-0.37	2.366	2	919.933	K.QFAFYTSPGFTVNN*SR.S	100	0	GPI-anchored cell wall protein of unknown function; induced in response to cell wall damaging agents and by mutations in genes involved in cell wall biogenesis; sequence similarity to YBR162C/TOS1, a covalently bound cell wall protein
NPP1	YCR026C	S000000621	-2.62	3.431	3	980.128	R.IWNNN*DTEPIWQTVQSAFDGDIPFK.A	264	0	Nucleotide pyrophosphatase/phosphodiesterase family member; mediates extracellular nucleotide phosphate hydrolysis along with Npp2p and Pho5p; activity and expression enhanced during conditions of phosphate starvation
EUG1	YDR518W	S000002926	2.41	4.841	3	1412.75	K.ILIAEVDSGANDILSFPVTGYPTIALYPAGNN*SKPIIFNK.I	463	0	Protein disulfide isomerase of the endoplasmic reticulum lumen, function overlaps with that of Pdi1p; may interact with nascent polypeptides in the ER
SGO1	YOR073W	S000005599	-0.01	2.172	3	1046.78	K.SSKGTSNNNNNYNNFDNN*NSN*INN*VNNK.S	552	0	Component of the spindle checkpoint, involved in sensing lack of tension on mitotic chromosomes; protects centromeric Rec8p at meiosis I; required for accurate chromosomal segregation at meiosis II and for mitotic chromosome stability
LHS1	YKL073W	S000001556	-8.21	5.071	2	998.942	K.SRNN*NETESTVINSADDK.T	843	0	Molecular chaperone of the endoplasmic reticulum lumen, involved in polypeptide translocation and folding; member of the Hsp70 family; localizes to the lumen of the ER; regulated by the unfolded protein response pathway
PHO3	YBR092C	S000000296	4.32	2.842	2	993.474	K.N*NLTAEYVPFMGNTFHK.S	355	0	Constitutively expressed acid phosphatase similar to Pho5p; brought to the cell surface by transport vesicles; hydrolyzes thiamin phosphates in the periplasmic space, increasing cellular thiamin uptake; expression is repressed by thiamin
