# Supplementary material for: Quantification of tunicamycin-induced protein expression and N-glycosylation changes in yeast
Source: Royal Society of Chemistry journal article supplement (doi:10.1039/c6an00144k), 2016-01-01
Supplement: c6an00144k4.xlsx [file c6an00144k4.xlsx]

## Sheet: Glycopeptides quantified
Table S-6. All 465 Quantified Unique N-Glycopeptides
Gene Symbol	Reference	SGD ID	PPM	XCorr	Obs m/z	z	ModScore Peptide	Peptide hits	Peptide H/L ratio	Annotation
ADP1	YCR011C	S000000604	-0.3	3.206	633.294	2	K.VFSGCN*VTNEK#.I	5	0.896267	Putative ATP-dependent permease of the ABC transporter family of proteins
ALG12	YNR030W	S000005313	-1.49	3.643	1260.27	3	K.TEN*TTLLQEMWPSFDFLITHEPTASQLPFEN*K#.T	5	0.6598	Alpha-1,6-mannosyltransferase localized to the ER; responsible for the addition of the alpha-1,6 mannose to dolichol-linked Man7GlcNAc2, acts in the dolichol pathway for N-glycosylation
ALG12	YNR030W	S000005313	-0.15	3.106	723.859	2	K.TTNHWELVN*TTK.M	6	0.650085	Alpha-1,6-mannosyltransferase localized to the ER; responsible for the addition of the alpha-1,6 mannose to dolichol-linked Man7GlcNAc2, acts in the dolichol pathway for N-glycosylation
APE3	YBR286W	S000000490	4.02	3.651	1413.58	2	R.VFMDYDMMASPN*YEYEIYDANNK.E	2	1.37702	Vacuolar aminopeptidase Y, processed to mature form by Prb1p
APE3	YBR286W	S000000490	3.93	1.986	1077.54	2	R.SDYVGFINN*GIPAGGIATGAEK.N	1	0.876545	Vacuolar aminopeptidase Y, processed to mature form by Prb1p
APE3	YBR286W	S000000490	-0.71	3.143	824.924	2	K.AHHLN*YTLVPFDGR@.S	6	0.815185	Vacuolar aminopeptidase Y, processed to mature form by Prb1p
APE3	YBR286W	S000000490	5.76	4.114	599.312	3	K.IKVDDLN*ATAWDLYR.L	6	0.659205	Vacuolar aminopeptidase Y, processed to mature form by Prb1p
APE3	YBR286W	S000000490	-2.16	3.429	1096.18	3	R.FAWWAAEEEGLLGSNFYAYN*LTK#EENSK#.I	1	0.657016	Vacuolar aminopeptidase Y, processed to mature form by Prb1p
APE3	YBR286W	S000000490	0.07	1.851	1090.84	3	R.FAWWAAEEEGLLGSNFYAYNLTKEEN*SK.I	1	0.657016	Vacuolar aminopeptidase Y, processed to mature form by Prb1p
APE3	YBR286W	S000000490	0.26	2.117	1015.01	2	K.SFAN*TTAFALSPPVDGFVGK.L	17	0.645639	Vacuolar aminopeptidase Y, processed to mature form by Prb1p
APE3	YBR286W	S000000490	-2.23	3.001	1342.13	2	R.FAWWAAEEEGLLGSN*FYAYNLTK.E	11	0.644432	Vacuolar aminopeptidase Y, processed to mature form by Prb1p
APE3	YBR286W	S000000490	0.04	4.446	897.763	3	R.FAWWAAEEEGLLGSNFYAYN*LTK#.E	292	0.63653	Vacuolar aminopeptidase Y, processed to mature form by Prb1p
APE3	YBR286W	S000000490	0.94	2.525	532.251	3	R.LAN*YSTPDYGHPTR.V	8	0.635626	Vacuolar aminopeptidase Y, processed to mature form by Prb1p
APE3	YBR286W	S000000490	3.77	4.444	777.873	2	K.VDDLN*ATAWDLYR.L	4	0.610579	Vacuolar aminopeptidase Y, processed to mature form by Prb1p
APE3	YBR286W	S000000490	0.25	3.02	699.356	2	K.IISFN*LSDAETGK.S	8	0.578044	Vacuolar aminopeptidase Y, processed to mature form by Prb1p
ATH1	YPR026W	S000006230	-0.51	4.084	925.814	3	R.AALFNPLGVISPSLGN*HTLNYDPEAR@.E	2	38.6019	Acid trehalase required for utilization of extracellular trehalose
ATH1	YPR026W	S000006230	0.14	3.76	1257.25	3	K.YN*SSLGLYETYN*LTDPDEFANHINNGAFTNAGIK.T	2	6.68395	Acid trehalase required for utilization of extracellular trehalose
ATH1	YPR026W	S000006230	-0.69	2.325	1140.26	3	K.ILDNVPVSPSEPYYEASR@N*QSLIEILPSN*R@.T	1	1.18748	Acid trehalase required for utilization of extracellular trehalose
ATH1	YPR026W	S000006230	-0.06	4.888	993.433	2	K.YEN*STNPINSSESFEEK#.D	4	1.04464	Acid trehalase required for utilization of extracellular trehalose
ATH1	YPR026W	S000006230	-3.28	3.345	1119.54	3	K.QITN*LTAGVPGDVAFSALDGNN*YTHWQPLDK#.I	1	0.983638	Acid trehalase required for utilization of extracellular trehalose
ATH1	YPR026W	S000006230	-0.89	2.958	1116.88	3	K.QITN*LTAGVPGDVAFSALDGN*NYTHWQPLDK.I	3	0.765514	Acid trehalase required for utilization of extracellular trehalose
ATH1	YPR026W	S000006230	-3.42	4.055	1314.61	2	K.WFNPQN*VTLDDVTNYSQN*LSMK#.D	1	0.634503	Acid trehalase required for utilization of extracellular trehalose
ATH1	YPR026W	S000006230	-0.43	3.151	718.659	3	R.SLIHDQDINFYN*GSENER.K	3	0.575146	Acid trehalase required for utilization of extracellular trehalose
AXL2	YIL140W	S000001402	1.76	3.224	1066.22	3	K.LGSINLLDAPDWVALDN*ATISGSVPDELLGK.N	2	1.37287	Integral plasma membrane protein required for axial budding in haploid cells, localizes to the incipient bud site and bud neck; glycosylated by Pmt4p; potential Cdc28p substrate
AXL2	YIL140W	S000001402	-1.7	3.745	751.396	2	K.FQSSN*LTLAGEVPK#.N	6	0.770678	Integral plasma membrane protein required for axial budding in haploid cells, localizes to the incipient bud site and bud neck; glycosylated by Pmt4p; potential Cdc28p substrate
AXL2	YIL140W	S000001402	0.89	4.662	902.425	2	R.VNESFTFQISN*DTYK#.S	2	0.70745	Integral plasma membrane protein required for axial budding in haploid cells, localizes to the incipient bud site and bud neck; glycosylated by Pmt4p; potential Cdc28p substrate
AXL2	YIL140W	S000001402	0.92	3.282	670.353	3	K.NALK#LDPNEVFN*VTFDR@.S	2	0.594727	Integral plasma membrane protein required for axial budding in haploid cells, localizes to the incipient bud site and bud neck; glycosylated by Pmt4p; potential Cdc28p substrate
AXL2	YIL140W	S000001402	1.88	3.389	784.879	2	K.LDPNEVFN*VTFDR.S	3	0.440648	Integral plasma membrane protein required for axial budding in haploid cells, localizes to the incipient bud site and bud neck; glycosylated by Pmt4p; potential Cdc28p substrate
AXL2	YIL140W	S000001402	-1.44	2.149	899.91	2	R.VN*ESFTFQISN*DTYK.S	6	0.313731	Integral plasma membrane protein required for axial budding in haploid cells, localizes to the incipient bud site and bud neck; glycosylated by Pmt4p; potential Cdc28p substrate
BAR1	YIL015W	S000001277	0.03	5.046	1298.3	3	K.FSGDLFTFPM^VNEYPTIVDAPATLAM^TIQGLGAQN*K.S	3	0.555978	Aspartyl protease secreted into the periplasmic space of mating type a cells, helps cells find mating partners, cleaves and inactivates alpha factor allowing cells to recover from alpha-factor-induced cell cycle arrest
BAR1	YIL015W	S000001277	-0.2	2.123	814.916	2	K.ISLAQANWN*ASEVSK#.K	6	0.439794	Aspartyl protease secreted into the periplasmic space of mating type a cells, helps cells find mating partners, cleaves and inactivates alpha factor allowing cells to recover from alpha-factor-induced cell cycle arrest
BAR1	YIL015W	S000001277	-0.65	2.221	588.983	3	K.ISLAQANWN*ASEVSK#K#.L	2	0.377134	Aspartyl protease secreted into the periplasmic space of mating type a cells, helps cells find mating partners, cleaves and inactivates alpha factor allowing cells to recover from alpha-factor-induced cell cycle arrest
CHS3	YBR023C	S000000227	0.22	2.353	690.81	4	K.NQDGSSK#PN*FTVENYAGWNCHTSK#.E	2	2.47469	Chitin synthase III, catalyzes the transfer of N-acetylglucosamine (GlcNAc) to chitin; required for synthesis of the majority of cell wall chitin, the chitin ring during bud emergence, and spore wall chitosan
CHS3	YBR023C	S000000227	0.74	3.608	795.011	3	K.SNSSIPHDDDNN*LAWYFPCK.L	2	0.976675	Chitin synthase III, catalyzes the transfer of N-acetylglucosamine (GlcNAc) to chitin; required for synthesis of the majority of cell wall chitin, the chitin ring during bud emergence, and spore wall chitosan
CHS3	YBR023C	S000000227	-0.64	3.909	1192.01	2	K.SN*SSIPHDDDNNLAWYFPCK.L	3	0.937376	Chitin synthase III, catalyzes the transfer of N-acetylglucosamine (GlcNAc) to chitin; required for synthesis of the majority of cell wall chitin, the chitin ring during bud emergence, and spore wall chitosan
CPR4	YCR069W	S000000665	1.1	3.576	1113.03	2	R.LAM^AYFGPDSN*TSEFIITTK.A	1	0.0134663	Peptidyl-prolyl cis-trans isomerase (cyclophilin), catalyzes the cis-trans isomerization of peptide bonds N-terminal to proline residues; has a potential role in the secretory pathway
CPR5	YDR304C	S000002712	1.49	4.356	1147.05	2	K.NTN*GSQFFITTVPCPWLDGK#.H	4	0.527868	Peptidyl-prolyl cis-trans isomerase (cyclophilin) of the endoplasmic reticulum, catalyzes the cis-trans isomerization of peptide bonds N-terminal to proline residues; transcriptionally induced in response to unfolded proteins in the ER
CPS1	YJL172W	S000003708	0.16	2.296	546.535	4	K.HSVDTILHDPAFR@N*SSIEK#.L	2	0.820372	Vacuolar carboxypeptidase yscS; expression is induced under low-nitrogen conditions
CPS1	YJL172W	S000003708	-1.25	4.465	1135.83	4	K.VNELGLLYTWEGSDPDLK#PLLLMAHQDVVPVNN*ETLSSWK#.F	3	0.63244	Vacuolar carboxypeptidase yscS; expression is induced under low-nitrogen conditions
CPS1	YJL172W	S000003708	-1.75	3.252	731.381	2	K.LVEYISN*QSHLR.S	1	0.591397	Vacuolar carboxypeptidase yscS; expression is induced under low-nitrogen conditions
CPS1	YJL172W	S000003708	1.82	5.719	1131.83	4	K.VNELGLLYTWEGSDPDLKPLLLMAHQDVVPVN*NETLSSWK.F	3	0.482801	Vacuolar carboxypeptidase yscS; expression is induced under low-nitrogen conditions
CPS1	YJL172W	S000003708	-0.49	1.717	488.736	2	K.YYWN*LSK.N	1	0.452943	Vacuolar carboxypeptidase yscS; expression is induced under low-nitrogen conditions
CRH1	YGR189C	S000003421	0.9	3.597	772.343	2	K.FHN*YTLDWAMDK.T	8	1.4569	Putative chitin transglycosidase, cell wall protein that functions in the transfer of chitin to beta(1-6)glucan; localizes to sites of polarized growth; expression is induced under cell wall stress conditions
CWH41	YGL027C	S000002995	-0.77	2.711	668.367	2	K.NNLN*LTVYFVK#.S	4	0.423314	Processing alpha glucosidase I, ER type II integral membrane N-glycoprotein involved in assembly of cell wall beta 1,6 glucan and asparagine-linked protein glycosylation; also involved in ER protein quality control and sensing of ER stress
CWH41	YGL027C	S000002995	-0.95	3.223	753.384	2	K.FTN*ESLLWAPYR@.S	4	0.312429	Processing alpha glucosidase I, ER type II integral membrane N-glycoprotein involved in assembly of cell wall beta 1,6 glucan and asparagine-linked protein glycosylation; also involved in ER protein quality control and sensing of ER stress
DAP2	YHR028C	S000001070	-1.45	3.698	796.118	4	R.YMHTPQENFDGYVESSVHN*VTALAQANR.F	6	0.75067	Dipeptidyl aminopeptidase, synthesized as a glycosylated precursor; localizes to the vacuolar membrane; similar to Ste13p
DAP2	YHR028C	S000001070	1.9	5.526	1148.6	2	K.TFIHNGQN*LTVESITASPDLK#.R	4	0.529279	Dipeptidyl aminopeptidase, synthesized as a glycosylated precursor; localizes to the vacuolar membrane; similar to Ste13p
DAP2	YHR028C	S000001070	-0.43	2.579	873.38	3	K.SIPHHSNTPDYQEPNSN*YTNDGK.L	6	0.44804	Dipeptidyl aminopeptidase, synthesized as a glycosylated precursor; localizes to the vacuolar membrane; similar to Ste13p
DCW1	YKL046C	S000001529	-0.16	2.807	1243.6	3	K.VTSYQWTYNQGLLLAGSAYLYN*FTGSDLWHTR.T	2	0.814846	Putative mannosidase, GPI-anchored membrane protein required for cell wall biosynthesis in bud formation;homologous to Dfg5p
DCW1	YKL046C	S000001529	0.69	3.591	1193.19	3	K.EFLN*ASQVFFHDGIVYEAACQGPNSCNTDQR.S	5	0.78922	Putative mannosidase, GPI-anchored membrane protein required for cell wall biosynthesis in bud formation;homologous to Dfg5p
DCW1	YKL046C	S000001529	-0.15	4.43	826.356	2	K.YVYDGVSIDDN*CTK.V	4	0.761861	Putative mannosidase, GPI-anchored membrane protein required for cell wall biosynthesis in bud formation;homologous to Dfg5p
DCW1	YKL046C	S000001529	1.39	4.025	793.362	2	R.YTGN*QTYVDWAEK#.V	6	0.571688	Putative mannosidase, GPI-anchored membrane protein required for cell wall biosynthesis in bud formation;homologous to Dfg5p
DCW1	YKL046C	S000001529	2.92	3.168	865.452	2	R.NQIMSWLN*TSAIAAAK#.S	7	0.569276	Putative mannosidase, GPI-anchored membrane protein required for cell wall biosynthesis in bud formation;homologous to Dfg5p
DCW1	YKL046C	S000001529	0.96	3.758	996.488	2	K.VYEWM^VGVNLISN*GTYK.Y	3	0.567936	Putative mannosidase, GPI-anchored membrane protein required for cell wall biosynthesis in bud formation;homologous to Dfg5p
DDR48	YMR173W	S000004784	0.97	5.361	1407.52	3	K.SSYGSSNNDSYGSNNDDSYGSNNN*DSYGSNNDDSYGSSNK#.K	1	16.8433	DNA damage-responsive protein, expression is increased in response to heat-shock stress or treatments that produce DNA lesions; contains multiple repeats of the amino acid sequence NNNDSYGS
DDR48	YMR173W	S000004784	-6.04	3.989	894.352	3	K.SSYGSNN*DDSYGSNNDDSYGSSNK#K#.K	1	7.73017	DNA damage-responsive protein, expression is increased in response to heat-shock stress or treatments that produce DNA lesions; contains multiple repeats of the amino acid sequence NNNDSYGS
DDR48	YMR173W	S000004784	7.99	4.48	1447.56	3	K.SSYGSSNNDSYGSNN*DDSYGSNNNDSYGSNNDDSYGSSNKK.K	1	5.94963	DNA damage-responsive protein, expression is increased in response to heat-shock stress or treatments that produce DNA lesions; contains multiple repeats of the amino acid sequence NNNDSYGS
DDR48	YMR173W	S000004784	2.38	5.3	1161.77	3	K.SSYGSN*NDDSYGSSNNNDSYGSNNDDSYGSSNK#.N	1	5.00857	DNA damage-responsive protein, expression is increased in response to heat-shock stress or treatments that produce DNA lesions; contains multiple repeats of the amino acid sequence NNNDSYGS
DDR48	YMR173W	S000004784	-1.08	4.524	1170.96	2	K.N*SYGSSNYGSSNNDDSYGSSNR@.G	1	4.50179	DNA damage-responsive protein, expression is increased in response to heat-shock stress or treatments that produce DNA lesions; contains multiple repeats of the amino acid sequence NNNDSYGS
DDR48	YMR173W	S000004784	12.12	4.503	863.689	3	R.N*KN*SYGSSN*YGSSNNDDSYGSSNR@.G	2	1	DNA damage-responsive protein, expression is increased in response to heat-shock stress or treatments that produce DNA lesions; contains multiple repeats of the amino acid sequence NNNDSYGS
DEF1	YKL054C	S000001537	-6.53	5.533	1208.52	3	K.NNYN*YYQTQNGQEQQSPNQGVAQHSEDSQQK#.Q	1	0.700569	RNAPII degradation factor, forms a complex with Rad26p in chromatin, enables ubiquitination and proteolysis of RNAPII present in an elongation complex; mutant is deficient in Zip1p loading onto chromosomes during meiosis
DEF1	YKL054C	S000001537	-7.28	6.146	1208.52	3	K.NNYNYYQTQN*GQEQQSPNQGVAQHSEDSQQK#.Q	1	0.694141	RNAPII degradation factor, forms a complex with Rad26p in chromatin, enables ubiquitination and proteolysis of RNAPII present in an elongation complex; mutant is deficient in Zip1p loading onto chromosomes during meiosis
DFG16	YOR030W	S000005556	-0.34	2.068	872.45	2	R.AYN*YTLNYPSFLIR@.C	2	1.18838	Probable multiple transmembrane protein, involved in diploid invasive and pseudohyphal growth upon nitrogen starvation; required for accumulation of processed Rim101p
DFG5	YMR238W	S000004851	-0.04	3.512	765.697	3	K.GDANAGM^NSSTTN*VLQNNLNIK.K	1	0.872847	Putative mannosidase, essential glycosylphosphatidylinositol (GPI)-anchored membrane protein required for cell wall biogenesis in bud formation, involved in filamentous growth, homologous to Dcw1p
DFG5	YMR238W	S000004851	-1.09	5.652	1140.04	2	K.GDANAGMN*SSTTNVLQNNLNIK.K	13	0.797911	Putative mannosidase, essential glycosylphosphatidylinositol (GPI)-anchored membrane protein required for cell wall biogenesis in bud formation, involved in filamentous growth, homologous to Dcw1p
DSE4	YNR067C	S000005350	0.15	2.546	550.771	2	K.LN*GTWAADNK#.D	5	0.386436	Daughter cell-specific secreted protein with similarity to glucanases, degrades cell wall from the daughter side causing daughter to separate from mother
ECM33	YBR078W	S000000282	13.04	2.26	938.91	2	R.GGAN*FDSSSSN*FSCNALK#.K	1	4.74004	GPI-anchored protein of unknown function, has a possible role in apical bud growth; GPI-anchoring on the plasma membrane crucial to function; phosphorylated in mitochondria; similar to Sps2p and Pst1p
ECM33	YBR078W	S000000282	-0.53	2.756	1202.96	3	R.DVNSISFGSLQTVN*ASLGFINNTLPSLN*LTQLSK#.V	1	3.11126	GPI-anchored protein of unknown function, has a possible role in apical bud growth; GPI-anchoring on the plasma membrane crucial to function; phosphorylated in mitochondria; similar to Sps2p and Pst1p
ECM33	YBR078W	S000000282	0.58	2.921	1201.29	3	R.DVNSISFGSLQTVNASLGFIN*N*TLPSLN*LTQLSK.V	10	0.509764	GPI-anchored protein of unknown function, has a possible role in apical bud growth; GPI-anchoring on the plasma membrane crucial to function; phosphorylated in mitochondria; similar to Sps2p and Pst1p
ECM33	YBR078W	S000000282	0.23	2.865	1203.96	3	R.DVNSISFGSLQTVN*ASLGFINN*TLPSLN*LTQLSK#.V	3	0.509304	GPI-anchored protein of unknown function, has a possible role in apical bud growth; GPI-anchoring on the plasma membrane crucial to function; phosphorylated in mitochondria; similar to Sps2p and Pst1p
ECM33	YBR078W	S000000282	0.09	3.313	1201.29	3	R.DVNSISFGSLQTVN*ASLGFIN*N*TLPSLNLTQLSK.V	7	0.509269	GPI-anchored protein of unknown function, has a possible role in apical bud growth; GPI-anchoring on the plasma membrane crucial to function; phosphorylated in mitochondria; similar to Sps2p and Pst1p
ECM33	YBR078W	S000000282	0.4	3.981	1203.96	3	R.DVNSISFGSLQTVN*ASLGFIN*NTLPSLN*LTQLSK#.V	27	0.509269	GPI-anchored protein of unknown function, has a possible role in apical bud growth; GPI-anchoring on the plasma membrane crucial to function; phosphorylated in mitochondria; similar to Sps2p and Pst1p
ECM33	YBR078W	S000000282	0.3	2.834	1203.96	3	R.DVN*SISFGSLQTVNASLGFINN*TLPSLN*LTQLSK#.V	4	0.509163	GPI-anchored protein of unknown function, has a possible role in apical bud growth; GPI-anchoring on the plasma membrane crucial to function; phosphorylated in mitochondria; similar to Sps2p and Pst1p
ECM33	YBR078W	S000000282	-0.78	1.953	1122.09	2	K.AAFSNLTTVGGGFIIAN*N*TQLK.V	1	0.478603	GPI-anchored protein of unknown function, has a possible role in apical bud growth; GPI-anchoring on the plasma membrane crucial to function; phosphorylated in mitochondria; similar to Sps2p and Pst1p
ECM33	YBR078W	S000000282	0.3	2.418	1122.09	2	K.AAFSN*LTTVGGGFIIANN*TQLK.V	14	0.457439	GPI-anchored protein of unknown function, has a possible role in apical bud growth; GPI-anchoring on the plasma membrane crucial to function; phosphorylated in mitochondria; similar to Sps2p and Pst1p
ECM33	YBR078W	S000000282	0.15	2.097	783.084	3	K.VQTVGGAIEVTGN*FSTLDLSSLK#.S	223	0.451532	GPI-anchored protein of unknown function, has a possible role in apical bud growth; GPI-anchoring on the plasma membrane crucial to function; phosphorylated in mitochondria; similar to Sps2p and Pst1p
ECM33	YBR078W	S000000282	0.15	5.386	1122.09	2	K.AAFSN*LTTVGGGFIIAN*NTQLK.V	218	0.383846	GPI-anchored protein of unknown function, has a possible role in apical bud growth; GPI-anchoring on the plasma membrane crucial to function; phosphorylated in mitochondria; similar to Sps2p and Pst1p
ECM33	YBR078W	S000000282	0.38	1.789	665.299	3	R.GGANFDSSSSNFSCN*ALKK.L	1	0.365464	GPI-anchored protein of unknown function, has a possible role in apical bud growth; GPI-anchoring on the plasma membrane crucial to function; phosphorylated in mitochondria; similar to Sps2p and Pst1p
ECM33	YBR078W	S000000282	-10.48	3.655	1120.58	2	K.AAFSNLTTVGGGFIIAN*NTQLK.V	1	0.360008	GPI-anchored protein of unknown function, has a possible role in apical bud growth; GPI-anchoring on the plasma membrane crucial to function; phosphorylated in mitochondria; similar to Sps2p and Pst1p
ECM33	YBR078W	S000000282	-0.24	4.985	933.396	2	R.GGANFDSSSSN*FSCNALK.K	8	0.340753	GPI-anchored protein of unknown function, has a possible role in apical bud growth; GPI-anchoring on the plasma membrane crucial to function; phosphorylated in mitochondria; similar to Sps2p and Pst1p
ECM33	YBR078W	S000000282	-0.47	4.228	997.443	2	R.GGANFDSSSSN*FSCNALKK.L	6	0.298417	GPI-anchored protein of unknown function, has a possible role in apical bud growth; GPI-anchoring on the plasma membrane crucial to function; phosphorylated in mitochondria; similar to Sps2p and Pst1p
ECM38	YLR299W	S000004290	0.45	2.136	617.3	3	K.EDWSFVLN*STHDGVLK.E	3	0.667667	Gamma-glutamyltranspeptidase, major glutathione-degrading enzyme; involved in detoxification of electrophilic xenobiotics; expression induced mainly by nitrogen starvation
EGT2	YNL327W	S000005271	-1.37	4.061	1401.68	2	K.GSQQN*ITFQVPDAFSSFPQEPFSIK.H	4	1.23773	Glycosylphosphatidylinositol (GPI)-anchored cell wall endoglucanase required for proper cell separation after cytokinesis, expression is activated by Swi5p and tightly regulated in a cell cycle-dependent manner
EGT2	YNL327W	S000005271	-2.83	3.372	834.898	2	K.TNN*TAWFTVDLPMR.T	1	0.874785	Glycosylphosphatidylinositol (GPI)-anchored cell wall endoglucanase required for proper cell separation after cytokinesis, expression is activated by Swi5p and tightly regulated in a cell cycle-dependent manner
EGT2	YNL327W	S000005271	-2.49	2.502	681.348	2	K.STNN*FTISIPEK#.S	1	0.565344	Glycosylphosphatidylinositol (GPI)-anchored cell wall endoglucanase required for proper cell separation after cytokinesis, expression is activated by Swi5p and tightly regulated in a cell cycle-dependent manner
ENO2	YHR174W	S000001217	6.16	3.166	988.019	2	K.GVM^NAVNN*VNN*VIAAAFVK#.A	1	1.65519	Enolase II, a phosphopyruvate hydratase that catalyzes the conversion of 2-phosphoglycerate to phosphoenolpyruvate during glycolysis and the reverse reaction during gluconeogenesis; expression is induced in response to glucose
ENO2	YHR174W	S000001217	-0.49	2.136	974.513	2	K.GVMNAVN*NVNNVIAAAFVK.A	17	1.42237	Enolase II, a phosphopyruvate hydratase that catalyzes the conversion of 2-phosphoglycerate to phosphoenolpyruvate during glycolysis and the reverse reaction during gluconeogenesis; expression is induced in response to glucose
ENO2	YHR174W	S000001217	0.14	2.238	978.521	2	K.GVMNAVNNVNN*VIAAAFVK#.A	17	1.40522	Enolase II, a phosphopyruvate hydratase that catalyzes the conversion of 2-phosphoglycerate to phosphoenolpyruvate during glycolysis and the reverse reaction during gluconeogenesis; expression is induced in response to glucose
ENO2	YHR174W	S000001217	0.63	4.062	982.512	2	K.GVM^NAVNN*VNNVIAAAFVK.A	3	1.39214	Enolase II, a phosphopyruvate hydratase that catalyzes the conversion of 2-phosphoglycerate to phosphoenolpyruvate during glycolysis and the reverse reaction during gluconeogenesis; expression is induced in response to glucose
ENO2	YHR174W	S000001217	0.26	1.921	974.514	2	K.GVMNAVNNVN*NVIAAAFVK.A	5	1.37716	Enolase II, a phosphopyruvate hydratase that catalyzes the conversion of 2-phosphoglycerate to phosphoenolpyruvate during glycolysis and the reverse reaction during gluconeogenesis; expression is induced in response to glucose
ENO2	YHR174W	S000001217	0.9	3.477	978.522	2	K.GVMN*AVNNVNNVIAAAFVK#.A	8	1.36396	Enolase II, a phosphopyruvate hydratase that catalyzes the conversion of 2-phosphoglycerate to phosphoenolpyruvate during glycolysis and the reverse reaction during gluconeogenesis; expression is induced in response to glucose
ENO2	YHR174W	S000001217	1.69	3.45	712.401	2	K.LGAN*AILGVSMAAAR@.A	1	0.956741	Enolase II, a phosphopyruvate hydratase that catalyzes the conversion of 2-phosphoglycerate to phosphoenolpyruvate during glycolysis and the reverse reaction during gluconeogenesis; expression is induced in response to glucose
EPS1	YIL005W	S000001267	0.4	2.132	644.326	2	K.FPN*ITEGELEK#.K	3	0.451094	ER protein with chaperone and co-chaperone activity, involved in retention of resident ER proteins; has a role in recognizing proteins targeted for ER-associated degradation (ERAD), member of the protein disulfide isomerase family
ERG3	YLR056W	S000004046	-2.02	5.474	1120.09	2	K.LLGLNSGFSN*STILQETLNSK.N	4	0.453147	C-5 sterol desaturase, catalyzes the introduction of a C-5(6) double bond into episterol, a precursor in ergosterol biosynthesis; mutants are viable, but cannot grow on non-fermentable carbon sources
ERO1	YML130C	S000004599	-0.16	3.148	597.305	2	R.YTIENIN*STK#.E	4	2.66946	Thiol oxidase required for oxidative protein folding in the endoplasmic reticulum
ERO1	YML130C	S000004599	-0.75	2.753	742.901	2	K.AEIVPRPSN*GTVNK.W	4	1.90613	Thiol oxidase required for oxidative protein folding in the endoplasmic reticulum
ERO1	YML130C	S000004599	1.01	2.545	551.277	3	K.K#TNN*SQSHVFDDLK#.M	1	1.42573	Thiol oxidase required for oxidative protein folding in the endoplasmic reticulum
ERO1	YML130C	S000004599	-0.24	2.041	503.235	3	K.TN*NSQSHVFDDLK.M	5	1.19325	Thiol oxidase required for oxidative protein folding in the endoplasmic reticulum
EUG1	YDR518W	S000002926	0.83	5.821	1230.65	3	K.SLSIHLPN*TTEPILFDGNVDSLVGNSVALTQWLK#.V	3	0.63047	Protein disulfide isomerase of the endoplasmic reticulum lumen, function overlaps with that of Pdi1p; may interact with nascent polypeptides in the ER
EUG1	YDR518W	S000002926	5.47	4.15	1059.82	4	K.ILIAEVDSGANDILSFPVTGYPTIALYPAGNNSKPIIFN*K.I	1	0.566481	Protein disulfide isomerase of the endoplasmic reticulum lumen, function overlaps with that of Pdi1p; may interact with nascent polypeptides in the ER
EUG1	YDR518W	S000002926	7.73	7.115	1418.1	3	K.ILIAEVDSGANDILSFPVTGYPTIALYPAGN*NSK#PIIFNK#.I	3	0.276548	Protein disulfide isomerase of the endoplasmic reticulum lumen, function overlaps with that of Pdi1p; may interact with nascent polypeptides in the ER
EUG1	YDR518W	S000002926	2.41	4.841	1412.75	3	K.ILIAEVDSGANDILSFPVTGYPTIALYPAGNN*SKPIIFNK.I	1	0.0676953	Protein disulfide isomerase of the endoplasmic reticulum lumen, function overlaps with that of Pdi1p; may interact with nascent polypeptides in the ER
EXG2	YDR261C	S000002669	-1.26	4.518	1367.61	3	R.YDGSYYN*TTLFTTN*DKPVGTCISQNSLADWTQDYR.D	1	13.4795	Exo-1,3-beta-glucanase, involved in cell wall beta-glucan assembly; may be anchored to the plasma membrane via a glycosylphosphatidylinositol (GPI) anchor
EXG2	YDR261C	S000002669	-0.52	2.204	1370.61	3	R.YDGSYYN*TTLFTTN*DKPVGTCISQN*SLADWTQDYR@.D	1	3.47762	Exo-1,3-beta-glucanase, involved in cell wall beta-glucan assembly; may be anchored to the plasma membrane via a glycosylphosphatidylinositol (GPI) anchor
EXG2	YDR261C	S000002669	0.27	5.394	1092.99	4	R.YDGSYYNTTLFTTNDKPVGTCISQN*SLADWTQDYRDR.V	1	0.871758	Exo-1,3-beta-glucanase, involved in cell wall beta-glucan assembly; may be anchored to the plasma membrane via a glycosylphosphatidylinositol (GPI) anchor
EXG2	YDR261C	S000002669	-1.73	2.638	748.362	2	K.FASYYAN*DTITVK.G	5	0.756074	Exo-1,3-beta-glucanase, involved in cell wall beta-glucan assembly; may be anchored to the plasma membrane via a glycosylphosphatidylinositol (GPI) anchor
EXG2	YDR261C	S000002669	4.01	4.781	1366.62	3	R.YDGSYYN*TTLFTTNDKPVGTCISQNSLADWTQDYR.D	2	0.713038	Exo-1,3-beta-glucanase, involved in cell wall beta-glucan assembly; may be anchored to the plasma membrane via a glycosylphosphatidylinositol (GPI) anchor
EXG2	YDR261C	S000002669	-2.2	4.207	1098	4	R.YDGSYYN*TTLFTTNDK#PVGTCISQNSLADWTQDYR@DR@.V	2	0.612869	Exo-1,3-beta-glucanase, involved in cell wall beta-glucan assembly; may be anchored to the plasma membrane via a glycosylphosphatidylinositol (GPI) anchor
EXG2	YDR261C	S000002669	0.43	3.664	978.451	2	K.EANLFPSPFDN*YTYFK.A	4	0.515985	Exo-1,3-beta-glucanase, involved in cell wall beta-glucan assembly; may be anchored to the plasma membrane via a glycosylphosphatidylinositol (GPI) anchor
EXG2	YDR261C	S000002669	-0.16	2.007	616.655	3	K.TLGYN*TSLTLLDNHFK#.T	1	0.487238	Exo-1,3-beta-glucanase, involved in cell wall beta-glucan assembly; may be anchored to the plasma membrane via a glycosylphosphatidylinositol (GPI) anchor
EXG2	YDR261C	S000002669	-1.24	3.406	1092.99	4	R.YDGSYYNTTLFTTN*DKPVGTCISQNSLADWTQDYRDR.V	1	0.485284	Exo-1,3-beta-glucanase, involved in cell wall beta-glucan assembly; may be anchored to the plasma membrane via a glycosylphosphatidylinositol (GPI) anchor
EXG2	YDR261C	S000002669	6.65	4.912	1227.12	2	K.NLYIDN*ITFNDPYVSDGLQLK#.Y	4	0.468444	Exo-1,3-beta-glucanase, involved in cell wall beta-glucan assembly; may be anchored to the plasma membrane via a glycosylphosphatidylinositol (GPI) anchor
FET3	YMR058W	S000004662	1.06	2.683	1497.06	3	K.SFM^SVYNPTGAEPIPQNLIVN*N*TMNLTWEVQPDTTYLLR.I	1	0.673243	Ferro-O2-oxidoreductase required for high-affinity iron uptake and involved in mediating resistance to copper ion toxicity, belongs to class of integral membrane multicopper oxidases
FET3	YMR058W	S000004662	-0.21	2.555	518.274	3	R.YTVLVHTK#N*DTDK#.N	4	0.531172	Ferro-O2-oxidoreductase required for high-affinity iron uptake and involved in mediating resistance to copper ion toxicity, belongs to class of integral membrane multicopper oxidases
FET3	YMR058W	S000004662	-1.36	2.48	968.969	2	K.NGVNYAFFNN*ITYTAPK.V	4	0.416388	Ferro-O2-oxidoreductase required for high-affinity iron uptake and involved in mediating resistance to copper ion toxicity, belongs to class of integral membrane multicopper oxidases
FET3	YMR058W	S000004662	-2.12	5.694	1126.55	3	K.VPTLMTVLSSGDQAN*NSEIYGSNTHTFILEK#.D	4	0.389933	Ferro-O2-oxidoreductase required for high-affinity iron uptake and involved in mediating resistance to copper ion toxicity, belongs to class of integral membrane multicopper oxidases
FET3	YMR058W	S000004662	0.97	5.223	1131.89	3	K.VPTLM^TVLSSGDQANN*SEIYGSNTHTFILEK#.D	1	0.389933	Ferro-O2-oxidoreductase required for high-affinity iron uptake and involved in mediating resistance to copper ion toxicity, belongs to class of integral membrane multicopper oxidases
FET3	YMR058W	S000004662	0.51	3.024	646.316	3	K.NGVNYAFFN*NITYTAPK.V	1	0.375192	Ferro-O2-oxidoreductase required for high-affinity iron uptake and involved in mediating resistance to copper ion toxicity, belongs to class of integral membrane multicopper oxidases
FET3	YMR058W	S000004662	0.21	3.058	771.89	2	K.N*VTDM^LYITVAQR.Y	1	0.0809458	Ferro-O2-oxidoreductase required for high-affinity iron uptake and involved in mediating resistance to copper ion toxicity, belongs to class of integral membrane multicopper oxidases
FET5	YFL041W	S000001853	-1.52	3.875	794.904	2	K.YAFFNN*ITYVTPK#.V	4	0.559302	Multicopper oxidase, integral membrane protein with similarity to Fet3p; may have a role in iron transport
FET5	YFL041W	S000001853	-0.33	3.434	676.333	3	K.LN*YTASWVTANPDGLHEK#.R	4	0.543876	Multicopper oxidase, integral membrane protein with similarity to Fet3p; may have a role in iron transport
FMP45	YDL222C	S000002381	4.96	4.611	1276.52	2	R.WYNYNWCGYEDGQLAN*CSSR@.A	10	1.87261	Integral membrane protein localized to mitochondria (untagged protein) and eisosomes, immobile patches at the cortex associated with endocytosis; sporulation and sphingolipid content are altered in mutants; has homologs SUR7 and YNL194C
GAA1	YLR088W	S000004078	-0.4	2.046	623.753	2	K.EMVN*MTSM^ER.N	9	0.61149	Subunit of the GPI (glycosylphosphatidylinositol):protein transamidase complex, removes the GPI-anchoring signal and attaches GPI to proteins in the ER
GAS1	YMR307W	S000004924	0.53	1.86	1273.6	3	K.TVVDTFANYTNVLGFFAGN*EVTNNYTN*TDASAFVK#.A	1	0.641002	Beta-1,3-glucanosyltransferase, required for cell wall assembly; localizes to the cell surface via a glycosylphosphatidylinositol (GPI) anchor
GAS1	YMR307W	S000004924	0.36	4.546	1273.6	3	K.TVVDTFANYTN*VLGFFAGNEVTNN*YTNTDASAFVK#.A	10	0.56601	Beta-1,3-glucanosyltransferase, required for cell wall assembly; localizes to the cell surface via a glycosylphosphatidylinositol (GPI) anchor
GAS1	YMR307W	S000004924	-2.16	3.897	1119.54	2	K.N*LSIPVFFSEYGCNEVTPR@.L	5	0.565422	Beta-1,3-glucanosyltransferase, required for cell wall assembly; localizes to the cell surface via a glycosylphosphatidylinositol (GPI) anchor
GAS1	YMR307W	S000004924	-1.48	4.058	953.449	4	K.TVVDTFANYTNVLGFFAGN*EVTNN*YTNTDASAFVK.A	5	0.562178	Beta-1,3-glucanosyltransferase, required for cell wall assembly; localizes to the cell surface via a glycosylphosphatidylinositol (GPI) anchor
GAS1	YMR307W	S000004924	-0.14	5.729	1270.93	3	K.TVVDTFAN*YTNVLGFFAGN*EVTNNYTNTDASAFVK.A	14	0.542032	Beta-1,3-glucanosyltransferase, required for cell wall assembly; localizes to the cell surface via a glycosylphosphatidylinositol (GPI) anchor
GAS1	YMR307W	S000004924	-0.41	5.513	953.45	4	K.TVVDTFAN*YTNVLGFFAGNEVTN*NYTNTDASAFVK.A	11	0.541638	Beta-1,3-glucanosyltransferase, required for cell wall assembly; localizes to the cell surface via a glycosylphosphatidylinositol (GPI) anchor
GAS1	YMR307W	S000004924	-0.25	6.014	1270.93	3	K.TVVDTFANYTN*VLGFFAGNEVTN*NYTNTDASAFVK.A	30	0.541638	Beta-1,3-glucanosyltransferase, required for cell wall assembly; localizes to the cell surface via a glycosylphosphatidylinositol (GPI) anchor
GAS1	YMR307W	S000004924	0.17	3.531	1273.6	3	K.TVVDTFAN*YTNVLGFFAGNEVTNN*YTNTDASAFVK#.A	57	0.541638	Beta-1,3-glucanosyltransferase, required for cell wall assembly; localizes to the cell surface via a glycosylphosphatidylinositol (GPI) anchor
GAS1	YMR307W	S000004924	0.62	4.091	1273.6	3	K.TVVDTFAN*YTNVLGFFAGNEVTNNYTN*TDASAFVK#.A	20	0.541638	Beta-1,3-glucanosyltransferase, required for cell wall assembly; localizes to the cell surface via a glycosylphosphatidylinositol (GPI) anchor
GAS1	YMR307W	S000004924	1.83	3.062	1270.93	3	K.TVVDTFANYTN*VLGFFAGNEVTNNYTN*TDASAFVK.A	13	0.541638	Beta-1,3-glucanosyltransferase, required for cell wall assembly; localizes to the cell surface via a glycosylphosphatidylinositol (GPI) anchor
GAS1	YMR307W	S000004924	-17.43	1.261	904.896	2	R.VYAIN*TTLDHSECM^K#.A	39	0.535961	Beta-1,3-glucanosyltransferase, required for cell wall assembly; localizes to the cell surface via a glycosylphosphatidylinositol (GPI) anchor
GAS1	YMR307W	S000004924	2.13	1.12	1273.61	3	K.TVVDTFANYTNVLGFFAGNEVTNN*YTN*TDASAFVK#.A	1	0.531227	Beta-1,3-glucanosyltransferase, required for cell wall assembly; localizes to the cell surface via a glycosylphosphatidylinositol (GPI) anchor
GAS1	YMR307W	S000004924	-0.13	2.303	1270.93	3	K.TVVDTFANYTN*VLGFFAGN*EVTNNYTNTDASAFVK.A	11	0.526279	Beta-1,3-glucanosyltransferase, required for cell wall assembly; localizes to the cell surface via a glycosylphosphatidylinositol (GPI) anchor
GAS1	YMR307W	S000004924	-1.45	5.256	1027.45	3	R.GVAYQADTAN*ETSGSTVNDPLANYESCSR.D	90	0.522046	Beta-1,3-glucanosyltransferase, required for cell wall assembly; localizes to the cell surface via a glycosylphosphatidylinositol (GPI) anchor
GAS1	YMR307W	S000004924	1.83	2.846	953.452	4	K.TVVDTFANYTNVLGFFAGN*EVTN*NYTNTDASAFVK.A	3	0.486901	Beta-1,3-glucanosyltransferase, required for cell wall assembly; localizes to the cell surface via a glycosylphosphatidylinositol (GPI) anchor
GAS1	YMR307W	S000004924	0.65	2.431	953.451	4	K.TVVDTFANYTNVLGFFAGNEVTN*N*YTNTDASAFVK.A	4	0.482918	Beta-1,3-glucanosyltransferase, required for cell wall assembly; localizes to the cell surface via a glycosylphosphatidylinositol (GPI) anchor
GAS1	YMR307W	S000004924	0.4	1.458	1027.45	3	R.GVAYQADTANETSGSTVN*DPLANYESCSR.D	5	0.465289	Beta-1,3-glucanosyltransferase, required for cell wall assembly; localizes to the cell surface via a glycosylphosphatidylinositol (GPI) anchor
GAS1	YMR307W	S000004924	-1.6	2.348	823.379	2	K.FFYSN*NGSQFYIR.G	8	0.445887	Beta-1,3-glucanosyltransferase, required for cell wall assembly; localizes to the cell surface via a glycosylphosphatidylinositol (GPI) anchor
GAS1	YMR307W	S000004924	1.24	1.413	1027.45	3	R.GVAYQADTANETSGSTVNDPLAN*YESCSR.D	1	0.429223	Beta-1,3-glucanosyltransferase, required for cell wall assembly; localizes to the cell surface via a glycosylphosphatidylinositol (GPI) anchor
GAS1	YMR307W	S000004924	0.16	2.366	826.39	2	K.FFYSNN*GSQFYIR@.G	109	0.420332	Beta-1,3-glucanosyltransferase, required for cell wall assembly; localizes to the cell surface via a glycosylphosphatidylinositol (GPI) anchor
GAS1	YMR307W	S000004924	0.33	4.618	1270.58	3	R.GVAYQADTAN*ETSGSTVNDPLANYESCSRDIPYLK.K	2	0.384832	Beta-1,3-glucanosyltransferase, required for cell wall assembly; localizes to the cell surface via a glycosylphosphatidylinositol (GPI) anchor
GAS1	YMR307W	S000004924	0.73	2.239	480.79	2	K.KLN*TNVIR.V	2	0.366923	Beta-1,3-glucanosyltransferase, required for cell wall assembly; localizes to the cell surface via a glycosylphosphatidylinositol (GPI) anchor
GAS1	YMR307W	S000004924	1.9	1.331	1270.93	3	K.TVVDTFAN*YTN*VLGFFAGNEVTNNYTNTDASAFVK.A	2	0.251791	Beta-1,3-glucanosyltransferase, required for cell wall assembly; localizes to the cell surface via a glycosylphosphatidylinositol (GPI) anchor
GAS1	YMR307W	S000004924	15.02	1.939	1029.45	3	R.GVAYQADTAN*ETSGSTVN*DPLAN*YESCSR.D	1	0.142477	Beta-1,3-glucanosyltransferase, required for cell wall assembly; localizes to the cell surface via a glycosylphosphatidylinositol (GPI) anchor
GAS3	YMR215W	S000004828	-0.8	4.155	1214.59	2	K.LN*STFEDAVIPLIFSEYGCNK#.N	4	0.240482	Putative 1,3-beta-glucanosyltransferase, has similarity to Gas1p; localizes to the cell wall
GAS3	YMR215W	S000004828	0.25	2.176	931.987	2	K.ILTDYAVPTTFN*YTIK.N	1	0.0480074	Putative 1,3-beta-glucanosyltransferase, has similarity to Gas1p; localizes to the cell wall
GAS5	YOL030W	S000005390	2.75	3.883	1054.85	3	R.GVDYQPGGSSN*LTDPLADASVCDR@DVPVLK#.D	4	0.507402	1,3-beta-glucanosyltransferase, has similarity to Gas1p; localizes to the cell wall
GAS5	YOL030W	S000005390	-6.66	5.012	1249.05	2	R.GVDYQPGGSSN*LTDPLADASVCDR.D	2	0.469696	1,3-beta-glucanosyltransferase, has similarity to Gas1p; localizes to the cell wall
GAS5	YOL030W	S000005390	0.81	4.538	1326.05	2	K.VSNPEGNGGYSTSNN*YSTCPDYEK#.G	10	0.377566	1,3-beta-glucanosyltransferase, has similarity to Gas1p; localizes to the cell wall
GDA1	YEL042W	S000000768	-0.4	2.641	708.693	3	K.THQLSSPCLPPKVN*ATNEK.V	5	4.8316	Guanosine diphosphatase located in the Golgi, involved in the transport of GDP-mannose into the Golgi lumen by converting GDP to GMP after mannose is transferred its substrate
GDA1	YEL042W	S000000768	0.02	2.998	708.693	3	K.THQLSSPCLPPKVNATN*EK.V	1	0.533034	Guanosine diphosphatase located in the Golgi, involved in the transport of GDP-mannose into the Golgi lumen by converting GDP to GMP after mannose is transferred its substrate
GDA1	YEL042W	S000000768	-0.8	3.562	752.356	3	K.FGDEN*YTLYQFSHLGYGLK.E	11	0.341747	Guanosine diphosphatase located in the Golgi, involved in the transport of GDP-mannose into the Golgi lumen by converting GDP to GMP after mannose is transferred its substrate
GNT1	YOR320C	S000005847	-3.27	2.987	695.861	2	K.LLVFN*QTEFDR@.V	3	0.385553	N-acetylglucosaminyltransferase capable of modification of N-linked glycans in the Golgi apparatus
GNT1	YOR320C	S000005847	1.9	4.648	1105.52	2	K.TLDNDGNDIPVGLN*DSVAYSK.Y	2	0.29882	N-acetylglucosaminyltransferase capable of modification of N-linked glycans in the Golgi apparatus
GPI13	YLL031C	S000003954	4.01	4.89	1284.6	3	R.FDFAIPVNESHSN*YNLNYHNNILSLYDSFASDK.D	1	1.69925	ER membrane localized phosphoryltransferase that adds phosphoethanolamine onto the third mannose residue of the glycosylphosphatidylinositol (GPI) anchor precursor; similar to human PIG-O protein
GPI13	YLL031C	S000003954	2.82	3.674	963.701	4	R.FDFAIPVNESHSNYNLN*YHNNILSLYDSFASDK.D	1	0.677034	ER membrane localized phosphoryltransferase that adds phosphoethanolamine onto the third mannose residue of the glycosylphosphatidylinositol (GPI) anchor precursor; similar to human PIG-O protein
GPI13	YLL031C	S000003954	1.55	4.263	787.882	2	R.HVLDNISSQN*ETSK.L	1	0.6447	ER membrane localized phosphoryltransferase that adds phosphoethanolamine onto the third mannose residue of the glycosylphosphatidylinositol (GPI) anchor precursor; similar to human PIG-O protein
GPI13	YLL031C	S000003954	1.83	2.16	911.903	2	K.ETSN*YN*IDNLGHDYR@.S	1	0.345702	ER membrane localized phosphoryltransferase that adds phosphoethanolamine onto the third mannose residue of the glycosylphosphatidylinositol (GPI) anchor precursor; similar to human PIG-O protein
GPI13	YLL031C	S000003954	3.27	3.398	963.701	4	R.FDFAIPVNESHSNYNLNYHNN*ILSLYDSFASDK.D	2	0.311251	ER membrane localized phosphoryltransferase that adds phosphoethanolamine onto the third mannose residue of the glycosylphosphatidylinositol (GPI) anchor precursor; similar to human PIG-O protein
GPI16	YHR188C	S000001231	0.64	3.494	624.986	3	R.R@SYASDIGAPLFN*STEK#.L	3	0.831737	Transmembrane protein subunit of the glycosylphosphatidylinositol transamidase complex that adds GPIs to newly synthesized proteins; human PIG-Tp homolog
GPI16	YHR188C	S000001231	0.91	4.768	851.907	2	R.SYASDIGAPLFN*STEK.L	3	0.592587	Transmembrane protein subunit of the glycosylphosphatidylinositol transamidase complex that adds GPIs to newly synthesized proteins; human PIG-Tp homolog
GPI17	YDR434W	S000002842	-3.14	6.308	1176.25	3	R.VPWSLQVLPYN*ETIEQMESEGNQFHVVTLK#.L	3	0.57427	Transmembrane protein subunit of the glycosylphosphatidylinositol transamidase complex that adds GPIs to newly synthesized proteins; human PIG-Sp homolog
GTB1	YDR221W	S000002629	0.65	3.55	864.19	4	K.LEQLR@GEYFNQLSHDPILYQFEQLN*STR@.L	2	0.751581	Glucosidase II beta subunit, forms a complex with alpha subunit Rot2p, involved in removal of two glucose residues from N-linked glycans during glycoprotein biogenesis in the ER
GTB1	YDR221W	S000002629	4.51	4.801	934.784	3	R.GEYFNQLSHDPILYQFEQLN*STR.L	4	0.708112	Glucosidase II beta subunit, forms a complex with alpha subunit Rot2p, involved in removal of two glucose residues from N-linked glycans during glycoprotein biogenesis in the ER
GTB1	YDR221W	S000002629	2.17	2.995	802.376	2	K.TFEYEPPKFN*LSE.-	2	0.0448499	Glucosidase II beta subunit, forms a complex with alpha subunit Rot2p, involved in removal of two glucose residues from N-linked glycans during glycoprotein biogenesis in the ER
HEH2	YDR458C	S000002866	-0.11	2.257	577.277	2	K.SN*NTNYIYR@.S	4	0.866547	Inner nuclear membrane (INM) protein; contains helix-extension-helix (HEH) motif, nuclear localization signal sequence; targeting to the INM requires the Srp1p-Kap95p karyopherins and the Ran cycle
HEH2	YDR458C	S000002866	-0.42	3.141	688.847	2	K.SK#SN*NTNYIYR@.S	2	0.609628	Inner nuclear membrane (INM) protein; contains helix-extension-helix (HEH) motif, nuclear localization signal sequence; targeting to the INM requires the Srp1p-Kap95p karyopherins and the Ran cycle
HMG2	YLR450W	S000004442	-0.9	2.828	750.725	3	R.YLLSEEPKIPTELVSEN*GTK.W	1	1.03864	One of two isozymes of HMG-CoA reductase that convert HMG-CoA to mevalonate, a rate-limiting step in sterol biosynthesis; overproduction induces assembly of peripheral ER membrane arrays and short nuclear-associated membrane stacks
HMG2	YLR450W	S000004442	-0.47	2.825	645.837	2	K.IPTELVSEN*GTK.W	3	0.758647	One of two isozymes of HMG-CoA reductase that convert HMG-CoA to mevalonate, a rate-limiting step in sterol biosynthesis; overproduction induces assembly of peripheral ER membrane arrays and short nuclear-associated membrane stacks
KEX1	YGL203C	S000003171	-0.24	4.978	841.744	3	K.YDR@N*LTFVSVYN*ASHMVPFDK#.S	9	0.317494	Protease involved in the processing of killer toxin and alpha factor precursor; cleaves Lys and Arg residues from the C-terminus of peptides and proteins
KEX1	YGL203C	S000003171	-2.61	2.433	692.334	3	R.N*LTFVSVYN*ASHMVPFDK.S	1	0.161052	Protease involved in the processing of killer toxin and alpha factor precursor; cleaves Lys and Arg residues from the C-terminus of peptides and proteins
KRE2	YDR483W	S000002891	0.59	2.526	576.938	3	K.EHWSYPEWIN*QTK#.A	8	0.34801	Alpha1,2-mannosyltransferase of the Golgi involved in protein mannosylation
KRE5	YOR336W	S000005863	0.47	1.857	1488.66	2	K.YTPN*YFADSVYSSVNNTALESVCSER.I	1	0.908715	Protein required for beta-1,6 glucan biosynthesis; mutations result in aberrant morphology and severe growth defects
KRE5	YOR336W	S000005863	-0.32	5.745	992.774	3	K.YTPNYFADSVYSSVN*NTALESVCSER.I	3	0.893414	Protein required for beta-1,6 glucan biosynthesis; mutations result in aberrant morphology and severe growth defects
KRE5	YOR336W	S000005863	1.16	5.559	1079.06	2	K.SVEYPLTHPLEITLQN*GSR.M	5	0.831334	Protein required for beta-1,6 glucan biosynthesis; mutations result in aberrant morphology and severe growth defects
KRE5	YOR336W	S000005863	0.09	2.368	563.798	2	K.DITATLN*FTK.S	2	0.807257	Protein required for beta-1,6 glucan biosynthesis; mutations result in aberrant morphology and severe growth defects
KRE5	YOR336W	S000005863	-0.95	4.199	992.774	3	K.YTPNYFADSVYSSVNN*TALESVCSER.I	1	0.787417	Protein required for beta-1,6 glucan biosynthesis; mutations result in aberrant morphology and severe growth defects
KRE5	YOR336W	S000005863	5.99	3.748	765.355	3	R.MDLSEFFRPNN*LTMFEDGK.S	4	0.769024	Protein required for beta-1,6 glucan biosynthesis; mutations result in aberrant morphology and severe growth defects
KRE5	YOR336W	S000005863	5.96	4.381	825.478	2	R.FLFLDVLLPQN*ISK.V	3	0.634372	Protein required for beta-1,6 glucan biosynthesis; mutations result in aberrant morphology and severe growth defects
KRE5	YOR336W	S000005863	0	2.153	573.287	2	K.N*STDNLTELK#.S	1	0.564913	Protein required for beta-1,6 glucan biosynthesis; mutations result in aberrant morphology and severe growth defects
KRE6	YPR159W	S000006363	-2.29	5.247	1135.04	2	K.DLEWYSPDASTTVN*GTLQLR.M	3	0.815185	Protein required for beta-1,6 glucan biosynthesis; putative beta-glucan synthase; appears functionally redundant with Skn1p
KTR1	YOR099W	S000005625	-0.49	2.851	594.826	2	K.N*VTSALVSGTTK#.Y	2	0.528253	Alpha-1,2-mannosyltransferase involved in O- and N-linked protein glycosylation; type II membrane protein; member of the KRE2/MNT1 mannosyltransferase family
KTR1	YOR099W	S000005625	0.17	4.181	1173.88	3	K.FNYDWVFLNDEEFTDEFKN*VTSALVSGTTK.Y	2	0.421616	Alpha-1,2-mannosyltransferase involved in O- and N-linked protein glycosylation; type II membrane protein; member of the KRE2/MNT1 mannosyltransferase family
KTR6	YPL053C	S000005974	-0.2	3.762	1123.53	2	K.SYGGN*ETTLGFMVPSYINHR.G	11	0.475231	Probable mannosylphosphate transferase involved in the synthesis of core oligosaccharides in protein glycosylation pathway; member of the KRE2/MNT1 mannosyltransferase family
KTR7	YIL085C	S000001347	2.29	2.981	589.799	2	K.MN*ASFVMLTR@.N	3	0.356284	Putative mannosyltransferase involved in protein glycosylation; member of the KRE2/MNT1 mannosyltransferase family
LEM3	YNL323W	S000005267	4.12	3.205	1372.65	3	K.IYYPCGLIANSM^FN*DTFPLQLTNVGDTSNNYSLTN*K#.G	3	0.831449	Membrane protein of the plasma membrane and ER, involved in translocation of phospholipids and alkylphosphocholine drugs across the plasma membrane
LEM3	YNL323W	S000005267	-0.09	2.294	1369.97	3	K.IYYPCGLIANSM^FNDTFPLQLTN*VGDTSNN*YSLTNK.G	1	0.78366	Membrane protein of the plasma membrane and ER, involved in translocation of phospholipids and alkylphosphocholine drugs across the plasma membrane
LEM3	YNL323W	S000005267	1.46	4.954	1369.97	3	K.IYYPCGLIAN*SM^FNDTFPLQLTNVGDTSNN*YSLTNK.G	2	0.714819	Membrane protein of the plasma membrane and ER, involved in translocation of phospholipids and alkylphosphocholine drugs across the plasma membrane
LEM3	YNL323W	S000005267	-0.09	3.277	1367.31	3	K.IYYPCGLIAN*SMFNDTFPLQLTNVGDTSNNYSLTN*K#.G	1	0.558179	Membrane protein of the plasma membrane and ER, involved in translocation of phospholipids and alkylphosphocholine drugs across the plasma membrane
LEM3	YNL323W	S000005267	-0.09	2.998	1367.31	3	K.IYYPCGLIAN*SMFNDTFPLQLTNVGDTSN*NYSLTNK#.G	1	0.54977	Membrane protein of the plasma membrane and ER, involved in translocation of phospholipids and alkylphosphocholine drugs across the plasma membrane
LEM3	YNL323W	S000005267	-0.19	4.576	1367.31	3	K.IYYPCGLIANSMFN*DTFPLQLTNVGDTSN*NYSLTNK#.G	3	0.547109	Membrane protein of the plasma membrane and ER, involved in translocation of phospholipids and alkylphosphocholine drugs across the plasma membrane
LEM3	YNL323W	S000005267	0.31	5.554	1364.64	3	K.IYYPCGLIANSMFN*DTFPLQLTNVGDTSNN*YSLTNK.G	3	0.547109	Membrane protein of the plasma membrane and ER, involved in translocation of phospholipids and alkylphosphocholine drugs across the plasma membrane
LEM3	YNL323W	S000005267	-3.43	4.774	1366.31	3	K.IYYPCGLIANSMFN*DTFPLQLTNVGDTSNNYSLTNK#.G	4	0.527777	Membrane protein of the plasma membrane and ER, involved in translocation of phospholipids and alkylphosphocholine drugs across the plasma membrane
LEM3	YNL323W	S000005267	0.04	2.343	673.342	3	K.TK#YN*YTQIAPPPYWEK#.M	7	0.510329	Membrane protein of the plasma membrane and ER, involved in translocation of phospholipids and alkylphosphocholine drugs across the plasma membrane
LEM3	YNL323W	S000005267	1.58	3.389	890.933	2	K.YN*YTQIAPPPYWEK#.M	3	0.487813	Membrane protein of the plasma membrane and ER, involved in translocation of phospholipids and alkylphosphocholine drugs across the plasma membrane
LHS1	YKL073W	S000001556	-1.35	2.796	1331.15	2	K.TSILTN*TTDSIPNN*FTIDLFENGK.L	1	0.83318	Molecular chaperone of the endoplasmic reticulum lumen, involved in polypeptide translocation and folding; member of the Hsp70 family; localizes to the lumen of the ER; regulated by the unfolded protein response pathway
LHS1	YKL073W	S000001556	-0.24	4.127	788.375	2	K.LSN*ESELYDVFTR.G	5	0.780462	Molecular chaperone of the endoplasmic reticulum lumen, involved in polypeptide translocation and folding; member of the Hsp70 family; localizes to the lumen of the ER; regulated by the unfolded protein response pathway
LHS1	YKL073W	S000001556	-0.59	4.588	877.384	2	R.NNN*ETESTVINSADDK.T	1	0.184054	Molecular chaperone of the endoplasmic reticulum lumen, involved in polypeptide translocation and folding; member of the Hsp70 family; localizes to the lumen of the ER; regulated by the unfolded protein response pathway
LHS1	YKL073W	S000001556	-8.21	5.071	998.942	2	K.SRNN*NETESTVINSADDK.T	1	0.00627443	Molecular chaperone of the endoplasmic reticulum lumen, involved in polypeptide translocation and folding; member of the Hsp70 family; localizes to the lumen of the ER; regulated by the unfolded protein response pathway
LHS1	YKL073W	S000001556	0.43	3.366	666.303	3	K.SRN*NNETESTVINSADDK.T	1	0.00394543	Molecular chaperone of the endoplasmic reticulum lumen, involved in polypeptide translocation and folding; member of the Hsp70 family; localizes to the lumen of the ER; regulated by the unfolded protein response pathway
LRO1	YNR008W	S000005291	0.78	2.454	851.718	3	K.SSSEDALNN*NTDTYGNFIRFER.N	1	0.697807	Acyltransferase that catalyzes diacylglycerol esterification; one of several acyltransferases that contribute to triglyceride synthesis; putative homolog of human lecithin cholesterol acyltransferase
LRO1	YNR008W	S000005291	1.18	3.002	855.732	3	K.SSSEDALNNN*TDTYGNFIR@FER@.N	1	0.697807	Acyltransferase that catalyzes diacylglycerol esterification; one of several acyltransferases that contribute to triglyceride synthesis; putative homolog of human lecithin cholesterol acyltransferase
LRO1	YNR008W	S000005291	-1.03	6.008	1063.98	2	K.SSSEDALNN*NTDTYGNFIR@.F	5	0.665726	Acyltransferase that catalyzes diacylglycerol esterification; one of several acyltransferases that contribute to triglyceride synthesis; putative homolog of human lecithin cholesterol acyltransferase
LRO1	YNR008W	S000005291	-1.32	4.809	1129.07	2	K.WAQGASPYNPAGIN*VTIVEMK#.H	5	0.36516	Acyltransferase that catalyzes diacylglycerol esterification; one of several acyltransferases that contribute to triglyceride synthesis; putative homolog of human lecithin cholesterol acyltransferase
MCD4	YKL165C	S000001648	-0.14	5.641	1267.31	3	R.TPLVAWGAGLNK#PVHNPFPVSDN*YTENWELSSIK#.R	4	2.01049	Protein involved in glycosylphosphatidylinositol (GPI) anchor synthesis; multimembrane-spanning protein that localizes to the endoplasmic reticulum; highly conserved among eukaryotes
MCD4	YKL165C	S000001648	1.99	4.115	946.73	4	R.TPLVAWGAGLNKPVHN*PFPVSDNYTENWELSSIK.R	1	1.75479	Protein involved in glycosylphosphatidylinositol (GPI) anchor synthesis; multimembrane-spanning protein that localizes to the endoplasmic reticulum; highly conserved among eukaryotes
MCD4	YKL165C	S000001648	0.03	4.351	836.919	2	R.SLVMNN*ATYGISHTR@.M	7	1.43694	Protein involved in glycosylphosphatidylinositol (GPI) anchor synthesis; multimembrane-spanning protein that localizes to the endoplasmic reticulum; highly conserved among eukaryotes
MCD4	YKL165C	S000001648	2.47	2.684	1117.85	3	K.SNPVNFDSFFN*QSTHTYSFGSPDILPM^FK#.D	11	1.01094	Protein involved in glycosylphosphatidylinositol (GPI) anchor synthesis; multimembrane-spanning protein that localizes to the endoplasmic reticulum; highly conserved among eukaryotes
MCD4	YKL165C	S000001648	0.72	5.422	1214.6	2	R.HLDQLFHN*STLN*STLDYEIR@.Q	2	0.981561	Protein involved in glycosylphosphatidylinositol (GPI) anchor synthesis; multimembrane-spanning protein that localizes to the endoplasmic reticulum; highly conserved among eukaryotes
MID1	YNL291C	S000005235	4.91	3.841	1138.25	3	K.NVM^ATGQQTIINSDSIYEWTPILSN*ITAGKK.D	1	0.756232	N-glycosylated integral membrane protein of the ER membrane and plasma membrane, functions as a stretch-activated Ca2+-permeable cation channel required for Ca2+ influx stimulated by pheromone; interacts with Cch1p; forms an oligomer
MID1	YNL291C	S000005235	0.1	4.215	764.036	3	K.TLMAQTYDHIAEALYAN*FSK.A	7	0.615018	N-glycosylated integral membrane protein of the ER membrane and plasma membrane, functions as a stretch-activated Ca2+-permeable cation channel required for Ca2+ influx stimulated by pheromone; interacts with Cch1p; forms an oligomer
MID1	YNL291C	S000005235	1.21	4.982	1380.65	2	K.NGPYLVSSQN*TSN*ATVTSN*STNPLER.T	2	0.107671	N-glycosylated integral membrane protein of the ER membrane and plasma membrane, functions as a stretch-activated Ca2+-permeable cation channel required for Ca2+ influx stimulated by pheromone; interacts with Cch1p; forms an oligomer
MKC7	YDR144C	S000002551	-1.02	2.584	770.385	2	K.GDKEDN*LTTLTTTK.I	2	0.430296	GPI-anchored aspartyl protease (yapsin) involved in protein processing; shares functions with Yap3p and Kex2p
MKC7	YDR144C	S000002551	-0.47	3.668	758.842	2	K.STAYSLFAN*DSDSK#.H	7	0.396447	GPI-anchored aspartyl protease (yapsin) involved in protein processing; shares functions with Yap3p and Kex2p
MMM1	YLL006W	S000003929	-0.48	3.229	684.81	2	K.QTSN*NSEFN*VSK#.N	4	0.45125	Mitochondrial outer membrane protein, component of the Mdm10-Mdm12-Mmm1 complex involved in import and assembly of outer membrane beta-barrel proteins
MMM1	YLL006W	S000003929	-0.27	3.248	680.803	2	K.QTSNN*SEFN*VSK.N	2	0.440175	Mitochondrial outer membrane protein, component of the Mdm10-Mdm12-Mmm1 complex involved in import and assembly of outer membrane beta-barrel proteins
MNL1	YHR204W	S000001247	-0.57	3.134	654.987	3	K.HSPVLTSN*GTR@EEDEFK#.M	1	0.819661	Alpha mannosidase-like protein of the endoplasmic reticulum required for degradation of glycoproteins but not for processing of N-linked oligosaccharides
MNL1	YHR204W	S000001247	-0.17	2.424	610.285	3	K.FN*NSVYSSHLEICQK.K	3	0.617196	Alpha mannosidase-like protein of the endoplasmic reticulum required for degradation of glycoproteins but not for processing of N-linked oligosaccharides
MNN1	YER001W	S000000803	-3.16	5.766	962.711	4	R.SPDFKPVENNYDN*STNVPQEIWFLDVSNTIHPK.W	5	0.177834	Alpha-1,3-mannosyltransferase, integral membrane glycoprotein of the Golgi complex, required for addition of alpha1,3-mannose linkages to N-linked and O-linked oligosaccharides, one of five S. cerevisiae proteins of the MNN1 family
MNN1	YER001W	S000000803	-1.56	3.333	966.719	4	R.SPDFK#PVEN*NYDNSTNVPQEIWFLDVSNTIHPK#.W	1	0.150371	Alpha-1,3-mannosyltransferase, integral membrane glycoprotein of the Golgi complex, required for addition of alpha1,3-mannose linkages to N-linked and O-linked oligosaccharides, one of five S. cerevisiae proteins of the MNN1 family
MNN1	YER001W	S000000803	-1.81	3.561	962.712	4	R.SPDFKPVENNYDNSTN*VPQEIWFLDVSNTIHPK.W	1	0.099208	Alpha-1,3-mannosyltransferase, integral membrane glycoprotein of the Golgi complex, required for addition of alpha1,3-mannose linkages to N-linked and O-linked oligosaccharides, one of five S. cerevisiae proteins of the MNN1 family
MNN1	YER001W	S000000803	1.75	4.735	884.415	2	K.TLN*ATFPNYDPDNFK#.K	1	0.0534821	Alpha-1,3-mannosyltransferase, integral membrane glycoprotein of the Golgi complex, required for addition of alpha1,3-mannose linkages to N-linked and O-linked oligosaccharides, one of five S. cerevisiae proteins of the MNN1 family
MNN1	YER001W	S000000803	-0.21	2.094	778.367	3	K.MFPFINN*FTTETFHEMVPK.I	4	0.0357677	Alpha-1,3-mannosyltransferase, integral membrane glycoprotein of the Golgi complex, required for addition of alpha1,3-mannose linkages to N-linked and O-linked oligosaccharides, one of five S. cerevisiae proteins of the MNN1 family
MNN4	YKL201C	S000001684	-0.38	2.81	688.839	2	K.SMN*QTTLDQVTK#.I	4	0.825878	Putative positive regulator of mannosylphosphate transferase (Mnn6p), involved in mannosylphosphorylation of N-linked oligosaccharides; expression increases in late-logarithmic and stationary growth phases
MNN5	YJL186W	S000003722	-0.74	1.706	489.268	2	K.LN*FSIPQR.E	4	0.405535	Alpha-1,2-mannosyltransferase, responsible for addition of the second alpha-1,2-linked mannose of the branches on the mannan backbone of oligosaccharides, localizes to an early Golgi compartment
MNN5	YJL186W	S000003722	-0.77	3.508	609.655	3	K.FTDTLSGKLN*FSIPQR.E	1	0.300138	Alpha-1,2-mannosyltransferase, responsible for addition of the second alpha-1,2-linked mannose of the branches on the mannan backbone of oligosaccharides, localizes to an early Golgi compartment
MNS1	YJR131W	S000003892	0.16	3.329	715.041	3	R.M^LGGLLSAYHLSDVLEVGN*K#.T	2	0.444175	Alpha-1,2-mannosidase involved in ER quality control; catalyzes the removal of one mannose residue from Man9GlcNAc to produce a single isomer of Man8GlcNAc in N-linked oligosaccharide biosynthesis; integral to ER membrane
MNS1	YJR131W	S000003892	-0.1	2.374	540.289	2	K.YLAYLTGN*R@.T	3	0.00651599	Alpha-1,2-mannosidase involved in ER quality control; catalyzes the removal of one mannose residue from Man9GlcNAc to produce a single isomer of Man8GlcNAc in N-linked oligosaccharide biosynthesis; integral to ER membrane
MNT3	YIL014W	S000001276	3.61	5.561	1149.54	3	R.SYDYCFLSGQLDPTAIFAN*STVNPHDLQNR.M	4	0.765779	Alpha-1,3-mannosyltransferase, adds the fourth and fifth alpha-1,3-linked mannose residues to O-linked glycans during protein O-glycosylation
MPD2	YOL088C	S000005448	-0.15	4.174	1207.56	2	K.SIEQYFDICNR@N*DSYTMIK#.Y	7	0.917322	Member of the protein disulfide isomerase (PDI) family, exhibits chaperone activity; overexpression suppresses the lethality of a pdi1 deletion but does not complement all Pdi1p functions; undergoes oxidation by Ero1p
MRL1	YPR079W	S000006283	0.45	2.318	1164.06	2	K.AQISYIGNLHN*CSYFFEVR@.S	4	0.879954	Membrane protein with similarity to mammalian mannose-6-phosphate receptors, possibly functions as a sorting receptor in the delivery of vacuolar hydrolases
MRL1	YPR079W	S000006283	0.04	2.731	634.257	2	K.YEN*GSMCPNGK#.D	2	0.578906	Membrane protein with similarity to mammalian mannose-6-phosphate receptors, possibly functions as a sorting receptor in the delivery of vacuolar hydrolases
MSC1	YML128C	S000004597	-0.86	3.611	814.366	2	K.YFDNSN*WSLDDIK#.G	1	0.78453	Protein of unknown function; mutant is defective in directing meiotic recombination events to homologous chromatids; the authentic, non-tagged protein is detected in highly purified mitochondria and is phosphorylated
NCR1	YPL006W	S000005927	-0.97	3.905	1086.04	2	R.APYSTALVYN*ETSVSASVFR@.T	5	0.679196	Vacuolar membrane protein that transits through the biosynthetic vacuolar protein sorting pathway, involved in sphingolipid metabolism; glycoprotein and functional orthologue of human Niemann Pick C1 (NPC1) protein
NGR1	YBR212W	S000000416	4.86	7.512	1251.8	4	R.LFLHQQQQQQQQQQQDGNFSM^EQMAHNN*YYNYNNYDYHR@.N	1	3.87985	RNA binding protein that negatively regulates growth rate; interacts with the 3' UTR of the mitochondrial porin (POR1) mRNA and enhances its degradation; overexpression impairs mitochondrial function; expressed in stationary phase
NPP1	YCR026C	S000000621	-0.33	3.891	844.889	2	K.AATHMWPGSDVN*YTK#.Y	9	0.60036	Nucleotide pyrophosphatase/phosphodiesterase family member; mediates extracellular nucleotide phosphate hydrolysis along with Npp2p and Pho5p; activity and expression enhanced during conditions of phosphate starvation
NPP1	YCR026C	S000000621	-2.24	4.202	1469.69	2	R.IWNNN*DTEPIWQTVQSAFDGDIPFK.A	3	0.361583	Nucleotide pyrophosphatase/phosphodiesterase family member; mediates extracellular nucleotide phosphate hydrolysis along with Npp2p and Pho5p; activity and expression enhanced during conditions of phosphate starvation
OSM1	YJR051W	S000003812	0.99	4.704	955.935	2	K.VYEN*YTNNINFYMSK#.N	9	0.542276	Fumarate reductase, catalyzes the reduction of fumarate to succinate, required for the reoxidation of intracellular NADH under anaerobic conditions; mutations cause osmotic sensitivity
OSM1	YJR051W	S000003812	-3.2	2.466	953.418	2	K.VYENYTN*NIN*FYMSK.N	1	0.535107	Fumarate reductase, catalyzes the reduction of fumarate to succinate, required for the reoxidation of intracellular NADH under anaerobic conditions; mutations cause osmotic sensitivity
OSM1	YJR051W	S000003812	-2.22	3.358	953.419	2	K.VYEN*YTN*NINFYMSK.N	1	0.491819	Fumarate reductase, catalyzes the reduction of fumarate to succinate, required for the reoxidation of intracellular NADH under anaerobic conditions; mutations cause osmotic sensitivity
OST1	YJL002C	S000003539	-1.95	3.784	1076.01	2	R.FPIFGGWNYN*FTVGWTNK.L	4	0.755367	Alpha subunit of the oligosaccharyltransferase complex of the ER lumen, which catalyzes asparagine-linked glycosylation of newly synthesized proteins
OST1	YJL002C	S000003539	0	3.698	949.166	3	R.FSSN*ETLAIVYSHNAPLNQVVNLRR.D	1	0.747373	Alpha subunit of the oligosaccharyltransferase complex of the ER lumen, which catalyzes asparagine-linked glycosylation of newly synthesized proteins
OST1	YJL002C	S000003539	0.46	4.209	1080.02	2	R.FPIFGGWN*YNFTVGWTNK#.L	4	0.732754	Alpha subunit of the oligosaccharyltransferase complex of the ER lumen, which catalyzes asparagine-linked glycosylation of newly synthesized proteins
OST1	YJL002C	S000003539	2.49	3.086	897.135	3	R.FSSN*ETLAIVYSHNAPLNQVVNLR.R	1	0.631039	Alpha subunit of the oligosaccharyltransferase complex of the ER lumen, which catalyzes asparagine-linked glycosylation of newly synthesized proteins
OST1	YJL002C	S000003539	0.03	3.207	1076.01	2	R.FPIFGGWNYNFTVGWTN*K.L	1	0.0659584	Alpha subunit of the oligosaccharyltransferase complex of the ER lumen, which catalyzes asparagine-linked glycosylation of newly synthesized proteins
PDC6	YGR087C	S000003319	0.1	4.068	1003.96	2	R.WAGN*ANELNAAYAADGYAR@.I	1	1.14902	Minor isoform of pyruvate decarboxylase, decarboxylates pyruvate to acetaldehyde, involved in amino acid catabolism; transcription is glucose- and ethanol-dependent, and is strongly induced during sulfur limitation
PDC6	YGR087C	S000003319	0.43	4.331	667.638	3	R.WAGNANELN*AAYAADGYAR.I	2	0.39145	Minor isoform of pyruvate decarboxylase, decarboxylates pyruvate to acetaldehyde, involved in amino acid catabolism; transcription is glucose- and ethanol-dependent, and is strongly induced during sulfur limitation
PDI1	YCL043C	S000000548	0.78	1.647	867.887	2	K.IDADFN*ATFYSM^ANK#.H	155	0.695586	Protein disulfide isomerase, multifunctional protein resident in the endoplasmic reticulum lumen, essential for the formation of disulfide bonds in secretory and cell-surface proteins, unscrambles non-native disulfide bonds
PDI1	YCL043C	S000000548	0.52	2.236	1075.25	3	K.QSQPAVAVVADLPAYLAN*ETFVTPVIVQSGK#.I	9	0.691452	Protein disulfide isomerase, multifunctional protein resident in the endoplasmic reticulum lumen, essential for the formation of disulfide bonds in secretory and cell-surface proteins, unscrambles non-native disulfide bonds
PDI1	YCL043C	S000000548	-1.2	2.902	1095.84	3	K.NITLAQIDCTENQDLCM^EHN*IPGFPSLK#.I	2	0.682973	Protein disulfide isomerase, multifunctional protein resident in the endoplasmic reticulum lumen, essential for the formation of disulfide bonds in secretory and cell-surface proteins, unscrambles non-native disulfide bonds
PDI1	YCL043C	S000000548	0.69	1.324	863.88	2	K.IDADFNATFYSM^AN*K.H	1	0.663239	Protein disulfide isomerase, multifunctional protein resident in the endoplasmic reticulum lumen, essential for the formation of disulfide bonds in secretory and cell-surface proteins, unscrambles non-native disulfide bonds
PDI1	YCL043C	S000000548	-4.11	5.036	1321.19	2	K.R@LAPTYQELADTYAN*ATSDVLIAK#.L	4	0.594954	Protein disulfide isomerase, multifunctional protein resident in the endoplasmic reticulum lumen, essential for the formation of disulfide bonds in secretory and cell-surface proteins, unscrambles non-native disulfide bonds
PDI1	YCL043C	S000000548	1.58	3.161	1090.52	3	K.N*ITLAQIDCTENQDLCMEHNIPGFPSLK#.I	10	0.586092	Protein disulfide isomerase, multifunctional protein resident in the endoplasmic reticulum lumen, essential for the formation of disulfide bonds in secretory and cell-surface proteins, unscrambles non-native disulfide bonds
PDI1	YCL043C	S000000548	-0.21	1.877	794.857	2	K.NSDVNN*SIDYEGPR@.T	1	0.531743	Protein disulfide isomerase, multifunctional protein resident in the endoplasmic reticulum lumen, essential for the formation of disulfide bonds in secretory and cell-surface proteins, unscrambles non-native disulfide bonds
PDI1	YCL043C	S000000548	-0.44	3.947	794.857	2	K.NSDVN*NSIDYEGPR@.T	5	0.525441	Protein disulfide isomerase, multifunctional protein resident in the endoplasmic reticulum lumen, essential for the formation of disulfide bonds in secretory and cell-surface proteins, unscrambles non-native disulfide bonds
PDI1	YCL043C	S000000548	-0.4	4.679	1088.84	3	K.N*ITLAQIDCTEN*QDLCMEHNIPGFPSLK.I	1	0.520258	Protein disulfide isomerase, multifunctional protein resident in the endoplasmic reticulum lumen, essential for the formation of disulfide bonds in secretory and cell-surface proteins, unscrambles non-native disulfide bonds
PDI1	YCL043C	S000000548	-0.97	1.561	1236.12	2	R.LAPTYQELADTYAN*ATSDVLIAK.L	54	0.320834	Protein disulfide isomerase, multifunctional protein resident in the endoplasmic reticulum lumen, essential for the formation of disulfide bonds in secretory and cell-surface proteins, unscrambles non-native disulfide bonds
PDR15	YDR406W	S000002814	-2.55	3.046	1256.61	2	R.RFPCAQYIPAGPAYQN*ITGTQR.V	4	0.546844	Plasma membrane ATP binding cassette (ABC) transporter, multidrug transporter and general stress response factor implicated in cellular detoxification; regulated by Pdr1p, Pdr3p and Pdr8p; promoter contains a PDR responsive element
PDR15	YDR406W	S000002814	0.2	5.281	1178.57	2	R.FPCAQYIPAGPAYQN*ITGTQR.V	2	0.517471	Plasma membrane ATP binding cassette (ABC) transporter, multidrug transporter and general stress response factor implicated in cellular detoxification; regulated by Pdr1p, Pdr3p and Pdr8p; promoter contains a PDR responsive element
PEP1	YBL017C	S000000113	-1.34	1.974	612.63	3	K.SNSN*GTSFVTLEHAVNR.N	8	0.680563	Type I transmembrane sorting receptor for multiple vacuolar hydrolases; cycles between the late-Golgi and prevacuolar endosome-like compartments
PEP1	YBL017C	S000000113	0.45	4.732	1010.48	2	R.AVATAMN*GSYLYITNDQGK.S	6	0.598387	Type I transmembrane sorting receptor for multiple vacuolar hydrolases; cycles between the late-Golgi and prevacuolar endosome-like compartments
PHO11	YAR071W	S000000094	-0.37	2.195	507.765	2	K.HYN*DTLLK#.Q	1	0.340046	One of three repressible acid phosphatases, a glycoprotein that is transported to the cell surface by the secretory pathway; induced by phosphate starvation and coordinately regulated by PHO4 and PHO2
PHO11	YAR071W	S000000094	-1.21	3.129	649.786	2	K.FQCSN*DTYVR@.Y	5	0.318287	One of three repressible acid phosphatases, a glycoprotein that is transported to the cell surface by the secretory pathway; induced by phosphate starvation and coordinately regulated by PHO4 and PHO2
PHO3	YBR092C	S000000296	0.14	3.633	984.781	3	R.EFLAQYGYM^FEN*QTSFPIFAASSER.V	191	0.461691	Constitutively expressed acid phosphatase similar to Pho5p; brought to the cell surface by transport vesicles; hydrolyzes thiamin phosphates in the periplasmic space, increasing cellular thiamin uptake; expression is repressed by thiamin
PHO3	YBR092C	S000000296	-1.18	2.783	665.319	3	K.NN*LTAEYVPFMGNTFHK#.S	3	0.399841	Constitutively expressed acid phosphatase similar to Pho5p; brought to the cell surface by transport vesicles; hydrolyzes thiamin phosphates in the periplasmic space, increasing cellular thiamin uptake; expression is repressed by thiamin
PHO3	YBR092C	S000000296	0.05	2.708	623.344	2	R.SVGANLFN*ATLK#.L	5	0.34329	Constitutively expressed acid phosphatase similar to Pho5p; brought to the cell surface by transport vesicles; hydrolyzes thiamin phosphates in the periplasmic space, increasing cellular thiamin uptake; expression is repressed by thiamin
PHO3	YBR092C	S000000296	-0.27	1.722	381.702	2	K.LSN*YTR@.Q	3	0.316066	Constitutively expressed acid phosphatase similar to Pho5p; brought to the cell surface by transport vesicles; hydrolyzes thiamin phosphates in the periplasmic space, increasing cellular thiamin uptake; expression is repressed by thiamin
PHO3	YBR092C	S000000296	0.17	1.937	368.21	2	K.GLN*LTSK.D	1	0.281362	Constitutively expressed acid phosphatase similar to Pho5p; brought to the cell surface by transport vesicles; hydrolyzes thiamin phosphates in the periplasmic space, increasing cellular thiamin uptake; expression is repressed by thiamin
PHO3	YBR092C	S000000296	1.32	4.041	993.471	2	K.N*NLTAEYVPFMGNTFHK.S	2	0.0201525	Constitutively expressed acid phosphatase similar to Pho5p; brought to the cell surface by transport vesicles; hydrolyzes thiamin phosphates in the periplasmic space, increasing cellular thiamin uptake; expression is repressed by thiamin
PHO3	YBR092C	S000000296	1.83	1.614	993.471	2	K.NNLTAEYVPFMGN*TFHK.S	1	0.00170501	Constitutively expressed acid phosphatase similar to Pho5p; brought to the cell surface by transport vesicles; hydrolyzes thiamin phosphates in the periplasmic space, increasing cellular thiamin uptake; expression is repressed by thiamin
PHO8	YDR481C	S000002889	-0.16	4.214	1036.85	3	R.QVTASYPQYVWYPQVLAN*ATHSGEFLK#.R	2	0.58269	Repressible alkaline phosphatase, a glycoprotein localized to the vacuole; regulated by levels of inorganic phosphate and by a system consisting of Pho4p, Pho9p, Pho80p, Pho81p and Pho85p; dephosphorylates phosphotyrosyl peptides
PLB1	YMR008C	S000004610	-0.23	3.675	1490.26	2	R.QFGSQGLN*LSFPYVPDVNTFVNLGLNK#.K	4	0.86802	Phospholipase B (lysophospholipase) involved in lipid metabolism, required for deacylation of phosphatidylcholine and phosphatidylethanolamine but not phosphatidylinositol
PLB1	YMR008C	S000004610	-0.24	3.737	635.291	2	R.HSFNGN*QSTFK.M	4	0.615146	Phospholipase B (lysophospholipase) involved in lipid metabolism, required for deacylation of phosphatidylcholine and phosphatidylethanolamine but not phosphatidylinositol
PLB1	YMR008C	S000004610	6.88	4.191	765.388	2	K.DAGFN*ISLADVWGR@.A	4	0.523895	Phospholipase B (lysophospholipase) involved in lipid metabolism, required for deacylation of phosphatidylcholine and phosphatidylethanolamine but not phosphatidylinositol
PLB1	YMR008C	S000004610	1.12	3.265	745.072	3	R.N*LTDLEYIPPLIVYIPNSR.H	1	0.494931	Phospholipase B (lysophospholipase) involved in lipid metabolism, required for deacylation of phosphatidylcholine and phosphatidylethanolamine but not phosphatidylinositol
PLB1	YMR008C	S000004610	-0.8	2.255	1124.14	3	K.QQNLN*ATLPSECSQCFTNYCWN*GTIDSR.S	1	0.487002	Phospholipase B (lysophospholipase) involved in lipid metabolism, required for deacylation of phosphatidylcholine and phosphatidylethanolamine but not phosphatidylinositol
PLB1	YMR008C	S000004610	-1.04	2.43	1260.59	2	R.ATSN*FSDTSLLSTLFGSNSSN*MPK#.I	1	0.485216	Phospholipase B (lysophospholipase) involved in lipid metabolism, required for deacylation of phosphatidylcholine and phosphatidylethanolamine but not phosphatidylinositol
PLB1	YMR008C	S000004610	-7.97	5.327	1260.58	2	R.ATSN*FSDTSLLSTLFGSN*SSNMPK#.I	6	0.45584	Phospholipase B (lysophospholipase) involved in lipid metabolism, required for deacylation of phosphatidylcholine and phosphatidylethanolamine but not phosphatidylinositol
PLB1	YMR008C	S000004610	-1.31	2.045	795.368	2	R.EASGLSDN*ETEWLK#.K	5	0.354412	Phospholipase B (lysophospholipase) involved in lipid metabolism, required for deacylation of phosphatidylcholine and phosphatidylethanolamine but not phosphatidylinositol
PLB2	YMR006C	S000004608	-0.41	3.213	762.418	2	K.YLGTN*VTNGK#PVNK#.D	4	0.606004	Phospholipase B (lysophospholipase) involved in phospholipid metabolism; displays transacylase activity in vitro; overproduction confers resistance to lysophosphatidylcholine
PLB2	YMR006C	S000004608	1.09	1.557	526.24	2	K.M^NYN*VTER@.L	6	0.433424	Phospholipase B (lysophospholipase) involved in phospholipid metabolism; displays transacylase activity in vitro; overproduction confers resistance to lysophosphatidylcholine
PLB2	YMR006C	S000004608	-0.09	3.431	1103.1	2	K.N*LTDLEYIPPLVVYIPNTK.H	1	0.39472	Phospholipase B (lysophospholipase) involved in phospholipid metabolism; displays transacylase activity in vitro; overproduction confers resistance to lysophosphatidylcholine
PLB2	YMR006C	S000004608	-0.1	5.046	830.911	2	K.SDAGFN*ISLSDLWAR@.A	2	0.378693	Phospholipase B (lysophospholipase) involved in phospholipid metabolism; displays transacylase activity in vitro; overproduction confers resistance to lysophosphatidylcholine
PLB2	YMR006C	S000004608	-2.61	1.673	865.449	2	K.SIVNPGGSN*LTYTIER@.W	8	0.371234	Phospholipase B (lysophospholipase) involved in phospholipid metabolism; displays transacylase activity in vitro; overproduction confers resistance to lysophosphatidylcholine
PLB2	YMR006C	S000004608	0.06	3.192	795.882	2	K.QESLN*ATLPPECTK.C	9	0.296664	Phospholipase B (lysophospholipase) involved in phospholipid metabolism; displays transacylase activity in vitro; overproduction confers resistance to lysophosphatidylcholine
PLB2	YMR006C	S000004608	9.08	1.62	1114.22	3	K.GMAFPYVPDVNTFLN*LGLTN*KPTFFGCDAK.N	1	0.281323	Phospholipase B (lysophospholipase) involved in phospholipid metabolism; displays transacylase activity in vitro; overproduction confers resistance to lysophosphatidylcholine
PLB2	YMR006C	S000004608	-0.14	2.699	622.306	2	K.HSFNGN*QSTLK#.M	3	0.268631	Phospholipase B (lysophospholipase) involved in phospholipid metabolism; displays transacylase activity in vitro; overproduction confers resistance to lysophosphatidylcholine
PLB2	YMR006C	S000004608	-4.12	4.211	1259.6	2	R.ATSN*FSDTSLLSTLFSSN*SSNVPK#.I	3	0.142299	Phospholipase B (lysophospholipase) involved in phospholipid metabolism; displays transacylase activity in vitro; overproduction confers resistance to lysophosphatidylcholine
PLB3	YOL011W	S000005371	0.11	3.615	764.403	2	K.YLGTN*VSNGVPLER@.G	1	1.9964	Phospholipase B (lysophospholipase) involved in phospholipid metabolism; hydrolyzes phosphatidylinositol and phosphatidylserine and displays transacylase activity in vitro
PLB3	YOL011W	S000005371	0.06	4.063	729.846	2	R.ATAN*FSDSSEVLSK.L	2	1.69537	Phospholipase B (lysophospholipase) involved in phospholipid metabolism; hydrolyzes phosphatidylinositol and phosphatidylserine and displays transacylase activity in vitro
PLB3	YOL011W	S000005371	0.76	3.925	866.91	2	K.QNADYN*TSLADIWGR@.A	1	1.14528	Phospholipase B (lysophospholipase) involved in phospholipid metabolism; hydrolyzes phosphatidylinositol and phosphatidylserine and displays transacylase activity in vitro
PLB3	YOL011W	S000005371	-1.4	3.626	1148.05	4	K.KPTFFGCDAN*NLTDLQYIPPLVVYLPNAEYSFNSN*QSAFK.L	1	1.12623	Phospholipase B (lysophospholipase) involved in phospholipid metabolism; hydrolyzes phosphatidylinositol and phosphatidylserine and displays transacylase activity in vitro
PLB3	YOL011W	S000005371	-0.79	5.032	1067.49	2	K.NYCWN*GTLDTTPLPDVEK#.D	2	1.03304	Phospholipase B (lysophospholipase) involved in phospholipid metabolism; hydrolyzes phosphatidylinositol and phosphatidylserine and displays transacylase activity in vitro
PLB3	YOL011W	S000005371	-0.34	3.471	465.592	3	R.IN*STHLPSFITR@.L	1	0.920634	Phospholipase B (lysophospholipase) involved in phospholipid metabolism; hydrolyzes phosphatidylinositol and phosphatidylserine and displays transacylase activity in vitro
PMT2	YAL023C	S000000021	1.74	3.515	867.661	4	K.NQALGGSLLHSHIQTYPDGSN*QQQVTCYGYK.D	1	1.79614	Protein O-mannosyltransferase, transfers mannose residues from dolichyl phosphate-D-mannose to protein serine/threonine residues; acts in a complex with Pmt1p, can instead interact with Pmt5p in some conditions; target for new antifungals
PMT2	YAL023C	S000000021	4.12	4.412	1273.11	2	R.GLPSWSEN*ETDIEYLKPGTSYR.L	2	0.804492	Protein O-mannosyltransferase, transfers mannose residues from dolichyl phosphate-D-mannose to protein serine/threonine residues; acts in a complex with Pmt1p, can instead interact with Pmt5p in some conditions; target for new antifungals
PMT2	YAL023C	S000000021	1.86	3.469	1156.55	3	K.N*QALGGSLLHSHIQTYPDGSNQQQVTCYGYK.D	1	0.207114	Protein O-mannosyltransferase, transfers mannose residues from dolichyl phosphate-D-mannose to protein serine/threonine residues; acts in a complex with Pmt1p, can instead interact with Pmt5p in some conditions; target for new antifungals
PMT3	YOR321W	S000005848	-0.04	2.096	511.266	3	R.IR@GVEPWTDAEN*K#.T	3	1.43873	Protein O-mannosyltransferase, transfers mannose residues from dolichyl phosphate-D-mannose to protein serine/threonine residues; acts in a complex with Pmt5p, can instead interact with Pmt1p in some conditions; target for new antifungals
PMT3	YOR321W	S000005848	0.46	1.851	628.792	2	R.GVEPWTDAEN*K#.T	5	0.770464	Protein O-mannosyltransferase, transfers mannose residues from dolichyl phosphate-D-mannose to protein serine/threonine residues; acts in a complex with Pmt5p, can instead interact with Pmt1p in some conditions; target for new antifungals
PMT5	YDL093W	S000002251	0.84	3.228	996.838	3	K.WIIELAEHPNEN*VTSFQN*LTDGTIIK.L	1	0.471327	Protein O-mannosyltransferase, transfers mannose residues from dolichyl phosphate-D-mannose to protein serine/threonine residues; acts in a complex with Pmt3p, can instead interact with Pmt2p in some conditions; target for new antifungals
PMT5	YDL093W	S000002251	0.26	3.278	999.509	3	K.WIIELAEHPN*ENVTSFQN*LTDGTIIK#.L	1	0.458311	Protein O-mannosyltransferase, transfers mannose residues from dolichyl phosphate-D-mannose to protein serine/threonine residues; acts in a complex with Pmt3p, can instead interact with Pmt2p in some conditions; target for new antifungals
PMT6	YGR199W	S000003431	0.69	4.191	963.796	3	K.QMDSPNPVYSNEN*STILHPVSTFFR@.L	2	0.772336	Protein O-mannosyltransferase, transfers mannose from dolichyl phosphate-D-mannose to protein serine/threonine residues of secretory proteins; reaction is essential for cell wall rigidity; member of a family of mannosyltransferases
PMT6	YGR199W	S000003431	0.42	4.247	768.376	2	R.SSGLELDQN*GTLNGK.I	4	0.693275	Protein O-mannosyltransferase, transfers mannose from dolichyl phosphate-D-mannose to protein serine/threonine residues of secretory proteins; reaction is essential for cell wall rigidity; member of a family of mannosyltransferases
POM152	YMR129W	S000004736	-0.24	3.401	1032.17	3	R.IN*STEEIEYIELEYRDLYTNSVELR.S	1	1.30695	Nuclear pore membrane glycoprotein; may be involved in duplication of nuclear pores and nuclear pore complexes during S-phase;
POM152	YMR129W	S000004736	-0.13	2.89	613.315	2	K.IMN*VTTDSLTK.V	3	0.963462	Nuclear pore membrane glycoprotein; may be involved in duplication of nuclear pores and nuclear pore complexes during S-phase;
POM152	YMR129W	S000004736	2.24	2.938	952.459	2	R.IN*STEEIEYIELEYR.D	2	0.638762	Nuclear pore membrane glycoprotein; may be involved in duplication of nuclear pores and nuclear pore complexes during S-phase;
PRC1	YMR297W	S000004912	2.06	4.282	946.497	2	K.VR@N*WTASITDEVAGEVK#.S	4	0.759804	Vacuolar carboxypeptidase Y (proteinase C), broad-specificity C-terminal exopeptidase involved in non-specific protein degradation in the vacuole; member of the serine carboxypeptidase family
PRY3	YJL078C	S000003614	1.25	3.46	817.71	3	K.YN*YSNPGFSESTGHFTQVVWK.S	3	0.363367	Protein of unknown function, has similarity to Pry1p and Pry2p and to the plant PR-1 class of pathogen related proteins
PST1	YDR055W	S000002462	6.91	5.556	1035.54	2	K.IN*SSLGFINNSISSLN*FTK#.L	1	462.786	Cell wall protein that contains a putative GPI-attachment site; secreted by regenerating protoplasts; up-regulated by activation of the cell integrity pathway, as mediated by Rlm1p; upregulated by cell wall damage via disruption of FKS1
PST1	YDR055W	S000002462	8.26	4.568	1034.05	2	K.INSSLGFIN*NSISSLNFTK#.L	2	149.93	Cell wall protein that contains a putative GPI-attachment site; secreted by regenerating protoplasts; up-regulated by activation of the cell integrity pathway, as mediated by Rlm1p; upregulated by cell wall damage via disruption of FKS1
PST1	YDR055W	S000002462	1.06	2.748	1215.16	2	K.NLSFSNLSTIGGALVVANN*TGLQK#.I	4	12.5834	Cell wall protein that contains a putative GPI-attachment site; secreted by regenerating protoplasts; up-regulated by activation of the cell integrity pathway, as mediated by Rlm1p; upregulated by cell wall damage via disruption of FKS1
PST1	YDR055W	S000002462	3.94	3.129	1096.02	2	K.SPVETVSDSLQFSFN*GN*QTK.I	1	11.3451	Cell wall protein that contains a putative GPI-attachment site; secreted by regenerating protoplasts; up-regulated by activation of the cell integrity pathway, as mediated by Rlm1p; upregulated by cell wall damage via disruption of FKS1
PST1	YDR055W	S000002462	4.94	3.441	1216.65	2	K.N*LSFSNLSTIGGALVVAN*NTGLQK#.I	10	11.3274	Cell wall protein that contains a putative GPI-attachment site; secreted by regenerating protoplasts; up-regulated by activation of the cell integrity pathway, as mediated by Rlm1p; upregulated by cell wall damage via disruption of FKS1
PST1	YDR055W	S000002462	-0.15	1.836	811.435	3	K.NLSFSNLSTIGGALVVAN*N*TGLQK#.I	3	10.3805	Cell wall protein that contains a putative GPI-attachment site; secreted by regenerating protoplasts; up-regulated by activation of the cell integrity pathway, as mediated by Rlm1p; upregulated by cell wall damage via disruption of FKS1
PST1	YDR055W	S000002462	0.85	2.494	1216.65	2	K.NLSFSN*LSTIGGALVVAN*NTGLQK#.I	42	10.0851	Cell wall protein that contains a putative GPI-attachment site; secreted by regenerating protoplasts; up-regulated by activation of the cell integrity pathway, as mediated by Rlm1p; upregulated by cell wall damage via disruption of FKS1
PST1	YDR055W	S000002462	-1.29	2.012	1216.65	2	K.NLSFSN*LSTIGGALVVANN*TGLQK#.I	52	8.53328	Cell wall protein that contains a putative GPI-attachment site; secreted by regenerating protoplasts; up-regulated by activation of the cell integrity pathway, as mediated by Rlm1p; upregulated by cell wall damage via disruption of FKS1
PST1	YDR055W	S000002462	-0.92	2.754	811.434	3	K.N*LSFSN*LSTIGGALVVANNTGLQK#.I	4	6.04713	Cell wall protein that contains a putative GPI-attachment site; secreted by regenerating protoplasts; up-regulated by activation of the cell integrity pathway, as mediated by Rlm1p; upregulated by cell wall damage via disruption of FKS1
PST1	YDR055W	S000002462	-5.17	2.756	1035.53	2	K.INSSLGFIN*NSISSLN*FTK#.L	2	5.34726	Cell wall protein that contains a putative GPI-attachment site; secreted by regenerating protoplasts; up-regulated by activation of the cell integrity pathway, as mediated by Rlm1p; upregulated by cell wall damage via disruption of FKS1
PST1	YDR055W	S000002462	0.49	4.039	760.898	2	R.CDTLVGN*LTIGGGLK.T	1	3.88254	Cell wall protein that contains a putative GPI-attachment site; secreted by regenerating protoplasts; up-regulated by activation of the cell integrity pathway, as mediated by Rlm1p; upregulated by cell wall damage via disruption of FKS1
PST1	YDR055W	S000002462	0.81	3.465	1094.52	2	K.SPVETVSDSLQFSFNGN*QTK.I	6	2.34177	Cell wall protein that contains a putative GPI-attachment site; secreted by regenerating protoplasts; up-regulated by activation of the cell integrity pathway, as mediated by Rlm1p; upregulated by cell wall damage via disruption of FKS1
PST1	YDR055W	S000002462	11.96	1.71	1214.15	2	K.N*LSFSNLSTIGGALVVAN*N*TGLQK.I	1	1.93027	Cell wall protein that contains a putative GPI-attachment site; secreted by regenerating protoplasts; up-regulated by activation of the cell integrity pathway, as mediated by Rlm1p; upregulated by cell wall damage via disruption of FKS1
PST1	YDR055W	S000002462	-1.9	4.358	1020.19	3	K.ITFDDLVWAN*NISLTDVHSVSFANLQK#.I	1	1.65313	Cell wall protein that contains a putative GPI-attachment site; secreted by regenerating protoplasts; up-regulated by activation of the cell integrity pathway, as mediated by Rlm1p; upregulated by cell wall damage via disruption of FKS1
PST1	YDR055W	S000002462	-1.58	3.624	1020.19	3	K.ITFDDLVWANN*ISLTDVHSVSFANLQK#.I	1	1.65313	Cell wall protein that contains a putative GPI-attachment site; secreted by regenerating protoplasts; up-regulated by activation of the cell integrity pathway, as mediated by Rlm1p; upregulated by cell wall damage via disruption of FKS1
PST1	YDR055W	S000002462	-0.12	2.825	565.755	2	K.SSN*FSCNALK.A	5	1.37468	Cell wall protein that contains a putative GPI-attachment site; secreted by regenerating protoplasts; up-regulated by activation of the cell integrity pathway, as mediated by Rlm1p; upregulated by cell wall damage via disruption of FKS1
PST1	YDR055W	S000002462	-2.84	1.812	1218.14	2	K.NLSFSN*LSTIGGALVVAN*N*TGLQK#.I	3	0.518818	Cell wall protein that contains a putative GPI-attachment site; secreted by regenerating protoplasts; up-regulated by activation of the cell integrity pathway, as mediated by Rlm1p; upregulated by cell wall damage via disruption of FKS1
PST1	YDR055W	S000002462	1.1	2.442	1214.14	2	K.N*LSFSN*LSTIGGALVVAN*NTGLQK.I	41	0.388261	Cell wall protein that contains a putative GPI-attachment site; secreted by regenerating protoplasts; up-regulated by activation of the cell integrity pathway, as mediated by Rlm1p; upregulated by cell wall damage via disruption of FKS1
PST1	YDR055W	S000002462	-1.89	1.712	809.758	3	K.N*LSFSN*LSTIGGALVVANN*TGLQK.I	2	0.247046	Cell wall protein that contains a putative GPI-attachment site; secreted by regenerating protoplasts; up-regulated by activation of the cell integrity pathway, as mediated by Rlm1p; upregulated by cell wall damage via disruption of FKS1
PST1	YDR055W	S000002462	-2.72	2.425	1037.03	2	K.IN*SSLGFIN*NSISSLN*FTK#.L	74	0.20338	Cell wall protein that contains a putative GPI-attachment site; secreted by regenerating protoplasts; up-regulated by activation of the cell integrity pathway, as mediated by Rlm1p; upregulated by cell wall damage via disruption of FKS1
PST1	YDR055W	S000002462	-3.81	1.498	1037.02	2	K.INSSLGFIN*N*SISSLN*FTK#.L	4	0.0600642	Cell wall protein that contains a putative GPI-attachment site; secreted by regenerating protoplasts; up-regulated by activation of the cell integrity pathway, as mediated by Rlm1p; upregulated by cell wall damage via disruption of FKS1
PST1	YDR055W	S000002462	0.21	4.254	1033.02	2	K.IN*SSLGFINN*SISSLN*FTK.L	39	0.0507623	Cell wall protein that contains a putative GPI-attachment site; secreted by regenerating protoplasts; up-regulated by activation of the cell integrity pathway, as mediated by Rlm1p; upregulated by cell wall damage via disruption of FKS1
PST1	YDR055W	S000002462	-1.69	1.208	1037.03	2	K.IN*SSLGFIN*N*SISSLNFTK#.L	4	0.0185955	Cell wall protein that contains a putative GPI-attachment site; secreted by regenerating protoplasts; up-regulated by activation of the cell integrity pathway, as mediated by Rlm1p; upregulated by cell wall damage via disruption of FKS1
PTC7	YHR076W	S000001118	2.56	6.694	877.039	3	K.SGYQSNN*SHGDAYSSGSQSGPFTYK.T	5	0.586296	Mitochondrially localized type 2C protein phosphatase; expression induced by growth on ethanol and by sustained osmotic stress; possible role in carbon source utilization in low oxygen environments
RAX2	YLR084C	S000004074	0.12	2.893	934.132	3	K.WTPYFISETTNTSNYN*PIIFINR@.D	1	0.596296	N-glycosylated protein involved in the maintenance of bud site selection during bipolar budding; localization requires Rax1p
RAX2	YLR084C	S000004074	-2.05	2.554	1400.69	2	K.WTPYFISETTN*TSNYNPIIFINR@.D	9	0.528729	N-glycosylated protein involved in the maintenance of bud site selection during bipolar budding; localization requires Rax1p
RAX2	YLR084C	S000004074	-0.87	2.254	702.342	2	K.SN*FTSTRLN*ETK.V	1	0.525004	N-glycosylated protein involved in the maintenance of bud site selection during bipolar budding; localization requires Rax1p
RAX2	YLR084C	S000004074	0.21	2.269	653.369	2	K.VGN*TTLNLFPVK.N	5	0.505226	N-glycosylated protein involved in the maintenance of bud site selection during bipolar budding; localization requires Rax1p
RAX2	YLR084C	S000004074	-1.08	2.009	703.321	2	K.N*SSLYADIYDNK.L	2	0.457534	N-glycosylated protein involved in the maintenance of bud site selection during bipolar budding; localization requires Rax1p
RAX2	YLR084C	S000004074	3.01	3.433	711.374	2	K.N*QTIQGDVHGITK#.T	5	0.453822	N-glycosylated protein involved in the maintenance of bud site selection during bipolar budding; localization requires Rax1p
RAX2	YLR084C	S000004074	2.15	3.971	808.907	2	R.N*LTMIAN*ETLGSNAR@.I	6	0.396035	N-glycosylated protein involved in the maintenance of bud site selection during bipolar budding; localization requires Rax1p
RAX2	YLR084C	S000004074	0.74	2.529	1187.24	3	R.NQEWN*ITSLPGN*ASSISSVSAIYTDIESNTLNK.R	1	0.39126	N-glycosylated protein involved in the maintenance of bud site selection during bipolar budding; localization requires Rax1p
RAX2	YLR084C	S000004074	3.74	4.283	998.987	2	R.GIVN*VTMWNQQN*NTIMK.T	12	0.377461	N-glycosylated protein involved in the maintenance of bud site selection during bipolar budding; localization requires Rax1p
RAX2	YLR084C	S000004074	4.78	5.408	1090.56	2	R.LGSFN*LTN*STMIPLLSGSEGK#.L	11	0.347215	N-glycosylated protein involved in the maintenance of bud site selection during bipolar budding; localization requires Rax1p
RNY1	YPL123C	S000006044	4.33	3.327	1139.49	2	K.GGDGYIGYSGN*YNWGGDTYPR@.R	1	2.1667	RNAse; member of the T(2) family of endoribonucleases
RNY1	YPL123C	S000006044	-0.26	4.486	849.415	2	K.KFNNN*DTSLQISGEK.L	5	1.00222	RNAse; member of the T(2) family of endoribonucleases
RNY1	YPL123C	S000006044	-1.24	3.538	789.374	2	K.FNNN*DTSLQISGEK#.L	4	0.922071	RNAse; member of the T(2) family of endoribonucleases
RNY1	YPL123C	S000006044	0.19	2.872	589.295	2	K.NDLN*ETELVK.E	3	0.694189	RNAse; member of the T(2) family of endoribonucleases
ROT1	YMR200W	S000004813	-0.87	4.292	1261.62	3	R.NPTCPMASLIYQHGTYNISEN*GTLVLNPIEVDGR@.Q	2	1.71868	Essential ER membrane protein; may be involved in protein folding; mutation causes defects in cell wall synthesis and in lysis of autophagic bodies, suppresses tor2 mutations, and is synthetically lethal with kar2-1 and with rot2 mutations
ROT1	YMR200W	S000004813	-0.32	2.58	521.247	2	R.YN*QTETFK#.E	5	1.23114	Essential ER membrane protein; may be involved in protein folding; mutation causes defects in cell wall synthesis and in lysis of autophagic bodies, suppresses tor2 mutations, and is synthetically lethal with kar2-1 and with rot2 mutations
ROT1	YMR200W	S000004813	-2.28	2.951	1265.93	3	R.NPTCPM^ASLIYQHGTYN*ISEN*GTLVLNPIEVDGR.Q	86	0.586336	Essential ER membrane protein; may be involved in protein folding; mutation causes defects in cell wall synthesis and in lysis of autophagic bodies, suppresses tor2 mutations, and is synthetically lethal with kar2-1 and with rot2 mutations
ROT1	YMR200W	S000004813	-2.64	3.581	1260.6	3	R.N*PTCPMASLIYQHGTYNISEN*GTLVLNPIEVDGR.Q	6	0.545537	Essential ER membrane protein; may be involved in protein folding; mutation causes defects in cell wall synthesis and in lysis of autophagic bodies, suppresses tor2 mutations, and is synthetically lethal with kar2-1 and with rot2 mutations
ROT1	YMR200W	S000004813	1.75	2.415	1262.61	3	R.N*PTCPMASLIYQHGTYN*ISENGTLVLNPIEVDGR@.Q	12	0.484813	Essential ER membrane protein; may be involved in protein folding; mutation causes defects in cell wall synthesis and in lysis of autophagic bodies, suppresses tor2 mutations, and is synthetically lethal with kar2-1 and with rot2 mutations
ROT1	YMR200W	S000004813	-1.83	2.131	1265.94	3	R.NPTCPM^ASLIYQHGTYN*ISENGTLVLN*PIEVDGR.Q	2	0.465564	Essential ER membrane protein; may be involved in protein folding; mutation causes defects in cell wall synthesis and in lysis of autophagic bodies, suppresses tor2 mutations, and is synthetically lethal with kar2-1 and with rot2 mutations
ROT1	YMR200W	S000004813	-1.45	2.828	1266.93	3	R.NPTCPM^ASLIYQHGTYN*ISEN*GTLVLN*PIEVDGR.Q	1	0.423226	Essential ER membrane protein; may be involved in protein folding; mutation causes defects in cell wall synthesis and in lysis of autophagic bodies, suppresses tor2 mutations, and is synthetically lethal with kar2-1 and with rot2 mutations
ROT2	YBR229C	S000000433	-1.04	3.864	895.97	2	K.ER@MPTN*SSGLLISSQR@.F	16	1.13713	Glucosidase II catalytic subunit required for normal cell wall synthesis; mutations in rot2 suppress tor2 mutations, and are synthetically lethal with rot1 mutations
ROT2	YBR229C	S000000433	-0.37	3.708	747.379	2	R.MPTN*SSGLLISSQR.F	9	1.02434	Glucosidase II catalytic subunit required for normal cell wall synthesis; mutations in rot2 suppress tor2 mutations, and are synthetically lethal with rot1 mutations
ROT2	YBR229C	S000000433	0.15	1.419	414.195	2	R.FN*ETWK.Y	4	0.875027	Glucosidase II catalytic subunit required for normal cell wall synthesis; mutations in rot2 suppress tor2 mutations, and are synthetically lethal with rot1 mutations
ROT2	YBR229C	S000000433	2.32	2.568	669.014	3	K.ISSFLSLSN*STADTFHLR@.N	2	0.708063	Glucosidase II catalytic subunit required for normal cell wall synthesis; mutations in rot2 suppress tor2 mutations, and are synthetically lethal with rot1 mutations
ROT2	YBR229C	S000000433	-1.16	4.617	971.973	2	R.GEYVETQFIFENN*TLK#.N	1	0.671565	Glucosidase II catalytic subunit required for normal cell wall synthesis; mutations in rot2 suppress tor2 mutations, and are synthetically lethal with rot1 mutations
ROT2	YBR229C	S000000433	-0.02	2.275	399.887	3	K.NNLQHN*ITLK.D	6	0.633449	Glucosidase II catalytic subunit required for normal cell wall synthesis; mutations in rot2 suppress tor2 mutations, and are synthetically lethal with rot1 mutations
ROT2	YBR229C	S000000433	2.27	4.317	967.969	2	R.GEYVETQFIFEN*NTLK.N	2	0.624815	Glucosidase II catalytic subunit required for normal cell wall synthesis; mutations in rot2 suppress tor2 mutations, and are synthetically lethal with rot1 mutations
SEC66	YBR171W	S000000375	1.11	3.788	1046.49	2	K.FSNN*GTFFETEEPIVETK.S	6	1.61653	Non-essential subunit of Sec63 complex (Sec63p, Sec62p, Sec66p and Sec72p); with Sec61 complex, Kar2p/BiP and Lhs1p forms a channel competent for SRP-dependent and post-translational SRP-independent protein targeting and import into the ER
SGO1	YOR073W	S000005599	-0.01	2.172	1046.78	3	K.SSKGTSNNNNNYNNFDNN*NSN*INN*VNNK.S	1	0.0325026	Component of the spindle checkpoint, involved in sensing lack of tension on mitotic chromosomes; protects centromeric Rec8p at meiosis I; required for accurate chromosomal segregation at meiosis II and for mitotic chromosome stability
SIP18	YMR175W	S000004787	-0.87	1.096	526.937	4	R.DDMN*M^DMGMGHDQSEGGMK.M	3	1.66405	Protein of unknown function whose expression is induced by osmotic stress
SKN1	YGR143W	S000003375	-2.67	2.516	1131.56	2	K.DLEWYSPDAVTTTN*GTLTLR@.M	3	1.27253	Protein involved in sphingolipid biosynthesis; type II membrane protein with similarity to Kre6p
SLN1	YIL147C	S000001409	-1.72	3.803	926.469	3	K.SVFN*DTTALEHSTIAIISAVYNSQGK#.A	2	1.43063	Histidine kinase osmosensor that regulates a MAP kinase cascade; transmembrane protein with an intracellular kinase domain that signals to Ypd1p and Ssk1p, thereby forming a phosphorelay system similar to bacterial two-component regulators
SLN1	YIL147C	S000001409	1.5	2.975	583.649	3	K.VFSIK#N*DTFISSAFR@.N	2	1.04739	Histidine kinase osmosensor that regulates a MAP kinase cascade; transmembrane protein with an intracellular kinase domain that signals to Ypd1p and Ssk1p, thereby forming a phosphorelay system similar to bacterial two-component regulators
SOP4	YJL192C	S000003728	1.86	4.179	736.891	2	K.NLEN*GTLQLNAFK#.N	3	0.975626	ER-membrane protein; suppressor of pma1-7, deletion of SOP4 slows down the export of wild-type Pma1p and Pma1-7 from the ER
SOP4	YJL192C	S000003728	-1.17	2.364	784.413	2	R.LDLAASN*ITGFVSTR.T	1	0.908904	ER-membrane protein; suppressor of pma1-7, deletion of SOP4 slows down the export of wild-type Pma1p and Pma1-7 from the ER
SOP4	YJL192C	S000003728	0.07	3.754	598.333	3	K.GR@LDLAASN*ITGFVSTR@.T	2	0.781545	ER-membrane protein; suppressor of pma1-7, deletion of SOP4 slows down the export of wild-type Pma1p and Pma1-7 from the ER
STE13	YOR219C	S000005745	-0.1	2.263	527.271	3	R.FN*DTSVDDIR@LNR@.Y	1	2.06866	Dipeptidyl aminopeptidase, Golgi integral membrane protein that cleaves on the carboxyl side of repeating -X-Ala- sequences, required for maturation of alpha factor, transcription is induced by a-factor
STE13	YOR219C	S000005745	0.28	3.327	592.77	2	R.FN*DTSVDDIR.L	1	1.04826	Dipeptidyl aminopeptidase, Golgi integral membrane protein that cleaves on the carboxyl side of repeating -X-Ala- sequences, required for maturation of alpha factor, transcription is induced by a-factor
STE13	YOR219C	S000005745	2.3	4.721	1230.1	2	K.YAMAVAPVTN*WTLYDSVYTER@.Y	9	0.372394	Dipeptidyl aminopeptidase, Golgi integral membrane protein that cleaves on the carboxyl side of repeating -X-Ala- sequences, required for maturation of alpha factor, transcription is induced by a-factor
STT3	YGL022W	S000002990	0.12	2.823	705.364	3	R.TTLVDNNTWN*NTHIAIVGK.A	4	0.770331	Subunit of the oligosaccharyltransferase complex of the ER lumen, which catalyzes asparagine-linked glycosylation of newly synthesized proteins; forms a subcomplex with Ost3p and Ost4p and is directly involved in catalysis
STT3	YGL022W	S000002990	-1.58	2.635	705.362	3	R.TTLVDNNTWNN*THIAIVGK.A	3	0.751477	Subunit of the oligosaccharyltransferase complex of the ER lumen, which catalyzes asparagine-linked glycosylation of newly synthesized proteins; forms a subcomplex with Ost3p and Ost4p and is directly involved in catalysis
STT3	YGL022W	S000002990	0.23	3.001	705.364	3	R.TTLVDNN*TWNNTHIAIVGK.A	1	0.751477	Subunit of the oligosaccharyltransferase complex of the ER lumen, which catalyzes asparagine-linked glycosylation of newly synthesized proteins; forms a subcomplex with Ost3p and Ost4p and is directly involved in catalysis
STT3	YGL022W	S000002990	0.69	2.206	575.787	2	K.YLVNN*SFYK.F	1	0.505121	Subunit of the oligosaccharyltransferase complex of the ER lumen, which catalyzes asparagine-linked glycosylation of newly synthesized proteins; forms a subcomplex with Ost3p and Ost4p and is directly involved in catalysis
STT3	YGL022W	S000002990	3.2	4.589	1059.04	2	R.TTLVDN*NTWN*NTHIAIVGK.A	2	0.405142	Subunit of the oligosaccharyltransferase complex of the ER lumen, which catalyzes asparagine-linked glycosylation of newly synthesized proteins; forms a subcomplex with Ost3p and Ost4p and is directly involved in catalysis
STT3	YGL022W	S000002990	0.87	3.043	706.36	3	R.TTLVDNN*TWN*NTHIAIVGK.A	1	0.323514	Subunit of the oligosaccharyltransferase complex of the ER lumen, which catalyzes asparagine-linked glycosylation of newly synthesized proteins; forms a subcomplex with Ost3p and Ost4p and is directly involved in catalysis
SUC2	YIL162W	S000001424	-0.35	2.785	837.947	2	K.NPVLAAN*STQFR@DPK#.V	2	0.421469	Invertase, sucrose hydrolyzing enzyme; a secreted, glycosylated form is regulated by glucose repression, and an intracellular, nonglycosylated enzyme is produced constitutively
SUC2	YIL162W	S000001424	4.53	3.677	814.424	2	K.AEPILN*ISNAGPWSR.F	1	0.0338711	Invertase, sucrose hydrolyzing enzyme; a secreted, glycosylated form is regulated by glucose repression, and an intracellular, nonglycosylated enzyme is produced constitutively
SUR4	YLR372W	S000004364	-2.31	3.196	1005.47	3	-.MN*TTTSTVIAAVADQFQSLN*SSSSCFLK.V	3	0.0178158	Elongase, involved in fatty acid and sphingolipid biosynthesis; synthesizes very long chain 20-26-carbon fatty acids from C18-CoA primers; involved in regulation of sphingolipid biosynthesis
SUR7	YML052W	S000004516	-0.05	5.048	1068	2	R.FYWVQGN*TTGIPNAGDETR@.W	5	0.559962	Putative integral membrane protein; component of eisosomes; associated with endocytosis, along with Pil1p and Lsp1p; sporulation and plasma membrane sphingolipid content are altered in mutants
TDH3	YGR192C	S000003424	0.08	4.079	1063.55	3	R.IALSR@PNVEVVALN*DPFITNDYAAYMFK#.Y	1	1.55369	Glyceraldehyde-3-phosphate dehydrogenase, isozyme 3, involved in glycolysis and gluconeogenesis; tetramer that catalyzes the reaction of glyceraldehyde-3-phosphate to 1,3 bis-phosphoglycerate; detected in the cytoplasm and cell-wall
TDH3	YGR192C	S000003424	4.94	2.991	868.111	3	K.VIN*DAFGIEEGLM^TTVHSLTATQK#.T	1	1.46206	Glyceraldehyde-3-phosphate dehydrogenase, isozyme 3, involved in glycolysis and gluconeogenesis; tetramer that catalyzes the reaction of glyceraldehyde-3-phosphate to 1,3 bis-phosphoglycerate; detected in the cytoplasm and cell-wall
TDH3	YGR192C	S000003424	1.26	2.99	1068.88	3	R.IALSR@PNVEVVALNDPFITN*DYAAYM^FK#.Y	2	0.334946	Glyceraldehyde-3-phosphate dehydrogenase, isozyme 3, involved in glycolysis and gluconeogenesis; tetramer that catalyzes the reaction of glyceraldehyde-3-phosphate to 1,3 bis-phosphoglycerate; detected in the cytoplasm and cell-wall
TED1	YIL039W	S000001301	1.69	4.804	1067.48	2	K.DNYWIEYETN*TTHPWR@.I	6	0.795371	Conserved phosphoesterase domain-containing protein that acts together with Emp24p/Erv25p in cargo exit from the ER; deletion confers sensitivity to 4-(N-(S-glutathionylacetyl)amino) phenylarsenoxide (GSAO)
TED1	YIL039W	S000001301	3.9	3.107	575.977	3	K.FN*GSTVLLTHVPFYK.R	3	0.606046	Conserved phosphoesterase domain-containing protein that acts together with Emp24p/Erv25p in cargo exit from the ER; deletion confers sensitivity to 4-(N-(S-glutathionylacetyl)amino) phenylarsenoxide (GSAO)
TED1	YIL039W	S000001301	1.94	3.256	624.017	3	R.K#FN*GSTVLLTHVPFYK#.R	4	0.577303	Conserved phosphoesterase domain-containing protein that acts together with Emp24p/Erv25p in cargo exit from the ER; deletion confers sensitivity to 4-(N-(S-glutathionylacetyl)amino) phenylarsenoxide (GSAO)
TPS2	YDR074W	S000002481	9	4.719	899.442	4	R.LEQQVNELVNSINSEYGN*LNFSPVQHYYMR@.I	2	3.63562	Phosphatase subunit of the trehalose-6-phosphate synthase/phosphatase complex, which synthesizes the storage carbohydrate trehalose; expression is induced by stress conditions and repressed by the Ras-cAMP pathway
TRE1	YPL176C	S000006097	0.81	4.482	1125.52	2	R.LAGEEEFMAYSNYPGN*VSLR.V	4	0.310024	Plasma membrane protein that binds to Bsd2p and regulates ubiquitylation and vacuolar degradation of the metal transporter Smf1p; function is redundant with that of Tre2p; has similarity to transferrin receptors
TUL1	YKL034W	S000001517	-1.08	3.143	794.062	3	K.LSYQDMLNNPLQN*ATYPLPGK.D	6	1.04638	Golgi-localized RING-finger ubiquitin ligase (E3), involved in ubiquitinating and sorting membrane proteins that contain polar transmembrane domains to multivesicular bodies for delivery to the vacuole for quality control purposes
TUL1	YKL034W	S000001517	1.14	2.981	865.745	3	R.TEHNTFVN*MTYTDSFRN*ITGLK.L	1	0.654697	Golgi-localized RING-finger ubiquitin ligase (E3), involved in ubiquitinating and sorting membrane proteins that contain polar transmembrane domains to multivesicular bodies for delivery to the vacuole for quality control purposes
TUL1	YKL034W	S000001517	-0.81	2.463	655.955	3	R.TEHNTFVN*MTYTDSFR.N	3	0.156355	Golgi-localized RING-finger ubiquitin ligase (E3), involved in ubiquitinating and sorting membrane proteins that contain polar transmembrane domains to multivesicular bodies for delivery to the vacuole for quality control purposes
TUL1	YKL034W	S000001517	3.36	4.935	1350.71	3	K.LIDDELNWPLGRPAN*LSSLPPINVVSGLLYSPDCGVR.L	1	0.101061	Golgi-localized RING-finger ubiquitin ligase (E3), involved in ubiquitinating and sorting membrane proteins that contain polar transmembrane domains to multivesicular bodies for delivery to the vacuole for quality control purposes
UTR2	YEL040W	S000000766	1.19	2.445	565.289	3	R.TLYK#N*ETYNATTQK#.Y	1	55.4686	Cell wall protein that functions in the transfer of chitin to beta(1-6)glucan; putative chitin transglycosidase; glycosylphosphatidylinositol (GPI)-anchored protein localized to the bud neck; has a role in cell wall maintenance
UTR2	YEL040W	S000000766	-0.2	3.594	848.923	2	R.TLYK#N*ETYN*ATTQK#.Y	5	0.188025	Cell wall protein that functions in the transfer of chitin to beta(1-6)glucan; putative chitin transglycosidase; glycosylphosphatidylinositol (GPI)-anchored protein localized to the bud neck; has a role in cell wall maintenance
VAN1	YML115C	S000004583	0.86	5.113	866.113	3	R.HLQN*GTLSQIFQEIDAVIDSQTK#.G	3	0.83024	Component of the mannan polymerase I, which contains Van1p and Mnn9p and is involved in the first steps of mannan synthesis; mutants are vanadate-resistant
VTH1	YIL173W	S000001435	4.41	4.61	910.799	3	R.LVHN*STGLYTTGDLGNIIM^YIPYR.S	2	0.443298	Putative membrane glycoprotein with strong similarity to Vth2p and Pep1p/Vps10p, may be involved in vacuolar protein sorting
WBP1	YEL002C	S000000728	-1.19	4.329	1404.16	2	R.LTLSPSGN*DSETQYYTTGEFILPDR.H	4	0.641291	Beta subunit of the oligosaccharyl transferase (OST) glycoprotein complex; required for N-linked glycosylation of proteins in the endoplasmic reticulum
WBP1	YEL002C	S000000728	4.47	6.134	1249.61	2	R.NYKLEYLDIN*STSTTVDLYDK.E	2	0.505208	Beta subunit of the oligosaccharyl transferase (OST) glycoprotein complex; required for N-linked glycosylation of proteins in the endoplasmic reticulum
YBL081W	YBL081W	S000000177	0.76	1.899	1199.2	3	K.YNNTGSYYYYNN*NNN*SSVNPHNQAGLQSIN*R@.S	1	0.526316	Non-essential protein of unknown function
YBL081W	YBL081W	S000000177	-5.31	6.607	1195.19	3	K.YNNTGSYYYYNNNN*NSSVNPHNQAGLQSINR.S	1	0.345462	Non-essential protein of unknown function
YBL081W	YBL081W	S000000177	-4.74	6.458	1195.19	3	K.YNNTGSYYYYN*NNNNSSVNPHNQAGLQSINR.S	1	0.309369	Non-essential protein of unknown function
YBR074W	YBR074W	S000000278	3.08	3.792	902.941	2	R.SILFQQQDPFN*ESSR@.F	4	0.546048	Putative metalloprotease
YBR074W	YBR074W	S000000278	4.85	5.987	1161.56	3	R.TLIFNFNNNEEFGLLGASTYFDHSWSN*LTK.Y	1	0.525514	Putative metalloprotease
YBR074W	YBR074W	S000000278	0.34	4.581	643.322	3	K.RVLEITGN*SSFASVSDDK.E	1	0.303612	Putative metalloprotease
YBR139W	YBR139W	S000000343	-2.31	2.83	1113.52	3	R.TFNLTSVM^IGN*GITDPLIQADYYEPMACGK.G	1	0.825305	Putative serine type carboxypeptidase with a role in phytochelatin synthesis; green fluorescent protein (GFP)-fusion protein localizes to the vacuole; expression induced by nitrogen limitation in a GLN3, GAT1-independent manner
YBR139W	YBR139W	S000000343	0.42	4.553	1121.53	3	R.TFN*LTSVM^IGNGITDPLIQADYYEPM^ACGK#.G	2	0.755289	Putative serine type carboxypeptidase with a role in phytochelatin synthesis; green fluorescent protein (GFP)-fusion protein localizes to the vacuole; expression induced by nitrogen limitation in a GLN3, GAT1-independent manner
YBR139W	YBR139W	S000000343	1.43	3.751	976.373	2	R.GPCEDN*STDGM^CYTGLR.Y	14	0.603698	Putative serine type carboxypeptidase with a role in phytochelatin synthesis; green fluorescent protein (GFP)-fusion protein localizes to the vacuole; expression induced by nitrogen limitation in a GLN3, GAT1-independent manner
YCL045C	YCL045C	S000000550	-0.76	2.05	953.133	3	R.LSN*SSDNFSYDPLTGHINK#PQFQTK#.Q	2	1.79415	Protein of unknown function; green fluorescent protein (GFP)-fusion protein localizes to the ER; interacts with Gal80p; YCL045C is not an essential gene
YCL045C	YCL045C	S000000550	3.57	3.464	1242.91	3	R.N*VLPFTIDEIQLDSNDHNAMVCVN*SSSNHWQK#.Y	1	0.577303	Protein of unknown function; green fluorescent protein (GFP)-fusion protein localizes to the ER; interacts with Gal80p; YCL045C is not an essential gene
YCL049C	YCL049C	S000000554	0.35	4.047	843.75	3	K.MLENEVQCPNER@N*ATTLEPLR@.L	2	5.01604	Protein of unknown function; localizes to membrane fraction; YCL049C is not an essential gene;
YCR061W	YCR061W	S000000657	-2.04	5.565	1173.53	2	R.LYWENYN*TTTYFTTQAGNR.S	3	0.121371	Protein of unknown function; green fluorescent protein (GFP)-fusion protein localizes to the cytoplasm in a punctate pattern; induced by treatment with 8-methoxypsoralen and UVA irradiation
YFR018C	YFR018C	S000001914	0.86	1.944	495.287	2	K.NLLLPFN*R.T	1	0.473029	Putative protein of unknown function
YFR018C	YFR018C	S000001914	-1.56	5.346	1040.5	2	K.EYNDLESNTVVSN*STLGVK#.I	3	0.450594	Putative protein of unknown function
YGP1	YNL160W	S000005104	2.9	2.173	1011.03	2	R.LFNSSSALN*ITELYNVAR@.V	3	6.81163	Cell wall-related secretory glycoprotein; induced by nutrient deprivation-associated growth arrest and upon entry into stationary phase; may be involved in adaptation prior to stationary phase entry; has similarity to Sps100p
YGP1	YNL160W	S000005104	1.07	2.131	1012.53	2	R.LFN*SSSALNITELYN*VAR@.V	1	0.727591	Cell wall-related secretory glycoprotein; induced by nutrient deprivation-associated growth arrest and upon entry into stationary phase; may be involved in adaptation prior to stationary phase entry; has similarity to Sps100p
YGP1	YNL160W	S000005104	-0.28	3.262	1012.52	2	R.LFN*SSSALN*ITELYNVAR@.V	206	0.727238	Cell wall-related secretory glycoprotein; induced by nutrient deprivation-associated growth arrest and upon entry into stationary phase; may be involved in adaptation prior to stationary phase entry; has similarity to Sps100p
YGP1	YNL160W	S000005104	-0.57	2.767	528.781	2	R.VVN*ETIQDK#.S	6	0.574588	Cell wall-related secretory glycoprotein; induced by nutrient deprivation-associated growth arrest and upon entry into stationary phase; may be involved in adaptation prior to stationary phase entry; has similarity to Sps100p
YGP1	YNL160W	S000005104	2.95	1.895	1011.03	2	R.LFN*SSSALNITELYNVAR@.V	1	0.283712	Cell wall-related secretory glycoprotein; induced by nutrient deprivation-associated growth arrest and upon entry into stationary phase; may be involved in adaptation prior to stationary phase entry; has similarity to Sps100p
YHR151C	YHR151C	S000001194	-0.1	3.006	689.668	3	R.RVLLN*NETSMVNEGN*NTR.L	1	0.498788	Putative protein of unknown function; YHR151C is synthetically sick with cdc13-1
YHR151C	YHR151C	S000001194	0.81	3.419	693.682	3	R.R@VLLNN*ETSMVNEGN*NTR@.L	1	0.498788	Putative protein of unknown function; YHR151C is synthetically sick with cdc13-1
YHR151C	YHR151C	S000001194	-0.89	5.197	958.958	2	R.VLLNN*ETSMVNEGN*NTR@.L	8	0.421996	Putative protein of unknown function; YHR151C is synthetically sick with cdc13-1
YJL171C	YJL171C	S000003707	2.68	4.466	1246.05	2	K.DITNN*ESCTCEVGDR@VWFSGK#.N	9	0.944289	GPI-anchored cell wall protein of unknown function; induced in response to cell wall damaging agents and by mutations in genes involved in cell wall biogenesis; sequence similarity to YBR162C/TOS1, a covalently bound cell wall protein
YJL171C	YJL171C	S000003707	-0.43	5.957	1185.47	3	R.TSQYPTNAN*CSCWASGCGEYDIFEAMN*GTEK.N	12	0.841596	GPI-anchored cell wall protein of unknown function; induced in response to cell wall damaging agents and by mutations in genes involved in cell wall biogenesis; sequence similarity to YBR162C/TOS1, a covalently bound cell wall protein
YJL171C	YJL171C	S000003707	-0.33	5.216	1190.8	3	R.TSQYPTN*ANCSCWASGCGEYDIFEAM^N*GTEK.N	3	0.825935	GPI-anchored cell wall protein of unknown function; induced in response to cell wall damaging agents and by mutations in genes involved in cell wall biogenesis; sequence similarity to YBR162C/TOS1, a covalently bound cell wall protein
YJL171C	YJL171C	S000003707	-1.64	3.248	843.097	3	K.N*SSSIGYYDLPAIWLLNDHIAR@.T	3	0.69602	GPI-anchored cell wall protein of unknown function; induced in response to cell wall damaging agents and by mutations in genes involved in cell wall biogenesis; sequence similarity to YBR162C/TOS1, a covalently bound cell wall protein
YJL171C	YJL171C	S000003707	1.53	2.08	841.093	3	K.NSSSIGYYDLPAIWLLN*DHIAR.T	1	0.683399	GPI-anchored cell wall protein of unknown function; induced in response to cell wall damaging agents and by mutations in genes involved in cell wall biogenesis; sequence similarity to YBR162C/TOS1, a covalently bound cell wall protein
YJL171C	YJL171C	S000003707	-0.03	4.493	889.861	2	K.DITNN*ESCTCEVGDR@.V	6	0.593698	GPI-anchored cell wall protein of unknown function; induced in response to cell wall damaging agents and by mutations in genes involved in cell wall biogenesis; sequence similarity to YBR162C/TOS1, a covalently bound cell wall protein
YJL171C	YJL171C	S000003707	-0.15	2.202	919.933	2	K.QFAFYTSPGFTVN*NSR.S	4	0.465144	GPI-anchored cell wall protein of unknown function; induced in response to cell wall damaging agents and by mutations in genes involved in cell wall biogenesis; sequence similarity to YBR162C/TOS1, a covalently bound cell wall protein
YJL171C	YJL171C	S000003707	-0.37	2.366	919.933	2	K.QFAFYTSPGFTVNN*SR.S	1	0.364907	GPI-anchored cell wall protein of unknown function; induced in response to cell wall damaging agents and by mutations in genes involved in cell wall biogenesis; sequence similarity to YBR162C/TOS1, a covalently bound cell wall protein
YKL100C	YKL100C	S000001583	-0.94	2.803	562.595	3	R.AFRN*NSSSANQSASNK.E	1	1.12724	Putative protein of unknown function with similarity to a human minor histocompatibility antigen; YKL100C is not an essential gene
YKL100C	YKL100C	S000001583	-0.66	3.015	563.591	3	R.AFRNN*SSSAN*QSASNK.E	2	0.611956	Putative protein of unknown function with similarity to a human minor histocompatibility antigen; YKL100C is not an essential gene
YLR001C	YLR001C	S000003991	-3.95	3.556	1188.26	3	K.IFSDFISSFSN*YNAYTNSSTVLVPLDVNFR@K#.F	1	1.45125	Putative protein of unknown function; the authentic, non-tagged protein is detected in highly purified mitochondria in high-throughput studies; YLR001C is not an essential gene
YLR001C	YLR001C	S000003991	-0.48	2.006	735.352	2	K.YLHGLN*CSEFVK.E	7	0.885092	Putative protein of unknown function; the authentic, non-tagged protein is detected in highly purified mitochondria in high-throughput studies; YLR001C is not an essential gene
YLR001C	YLR001C	S000003991	-0.15	4.045	739.664	3	K.SNSEGTSVSVNN*SDYSPISNR.I	1	0.70232	Putative protein of unknown function; the authentic, non-tagged protein is detected in highly purified mitochondria in high-throughput studies; YLR001C is not an essential gene
YLR001C	YLR001C	S000003991	-1.2	2.969	1108.99	2	K.SNSEGTSVSVN*NSDYSPISNR.I	7	0.661265	Putative protein of unknown function; the authentic, non-tagged protein is detected in highly purified mitochondria in high-throughput studies; YLR001C is not an essential gene
YLR001C	YLR001C	S000003991	6.06	6.127	937.826	3	K.FLELHLIPAN*VTQNLLDCN*GSISTK#.L	2	0.564756	Putative protein of unknown function; the authentic, non-tagged protein is detected in highly purified mitochondria in high-throughput studies; YLR001C is not an essential gene
YLR001C	YLR001C	S000003991	0.36	1.679	485.781	2	K.IVGSQN*LTK#.I	1	0.526425	Putative protein of unknown function; the authentic, non-tagged protein is detected in highly purified mitochondria in high-throughput studies; YLR001C is not an essential gene
YLR001C	YLR001C	S000003991	-0.86	2.687	592.781	2	R.DLEN*GTYLEK.R	3	0.496615	Putative protein of unknown function; the authentic, non-tagged protein is detected in highly purified mitochondria in high-throughput studies; YLR001C is not an essential gene
YLR001C	YLR001C	S000003991	2.12	3.185	937.822	3	K.FLELHLIPAN*VTQN*LLDCNGSISTK#.L	1	0.47185	Putative protein of unknown function; the authentic, non-tagged protein is detected in highly purified mitochondria in high-throughput studies; YLR001C is not an essential gene
YLR001C	YLR001C	S000003991	0.47	3.102	959.504	3	K.TGHVQYLNELQN*FTLFAPINSAFIK#.G	2	0.422786	Putative protein of unknown function; the authentic, non-tagged protein is detected in highly purified mitochondria in high-throughput studies; YLR001C is not an essential gene
YLR001C	YLR001C	S000003991	0.33	2.491	956.832	3	K.TGHVQYLN*ELQNFTLFAPINSAFIK.G	1	0.370899	Putative protein of unknown function; the authentic, non-tagged protein is detected in highly purified mitochondria in high-throughput studies; YLR001C is not an essential gene
YLR173W	YLR173W	S000004163	-1.29	3.565	692.282	2	K.DNMGSDLNN*DTGK.Y	3	0.24244	Putative protein of unknown function
YLR413W	YLR413W	S000004405	-0.73	2.882	1043.24	3	K.VMPQVGPILTVLGSALTAPN*TTVDTIFGALK.A	2	0.114729	Putative protein of unknown function; YLR413W is not an essential gene
YLR413W	YLR413W	S000004405	2.41	4.549	942.512	2	K.ILNSAVN*MTTITPEQLK#.E	7	0.102174	Putative protein of unknown function; YLR413W is not an essential gene
YLR413W	YLR413W	S000004405	0.73	4.9	1063.21	3	K.AAM^GALTDLLNYTTN*QTELLTSVESLALSK.E	1	0.098318	Putative protein of unknown function; YLR413W is not an essential gene
YLR413W	YLR413W	S000004405	0.49	2.323	1458.77	2	K.YVPYLFSLLAASSDPVSSFSSLVN*ITK#.W	3	0.0943653	Putative protein of unknown function; YLR413W is not an essential gene
YLR413W	YLR413W	S000004405	0.26	1.867	1064.21	3	K.AAM^GALTDLLN*YTTN*QTELLTSVESLALSK.E	1	0.0141114	Putative protein of unknown function; YLR413W is not an essential gene
YND1	YER005W	S000000807	-0.12	4.381	965.43	2	R.EFCNSN*WTQILANSDK.G	1	0.498374	Apyrase with wide substrate specificity, involved in preventing the inhibition of glycosylation by hydrolyzing nucleoside tri- and diphosphates which are inhibitors of glycotransferases; partially redundant with Gda1p
YNL217W	YNL217W	S000005161	0.73	3.756	682.04	3	K.IGGLGEN*ITMILLGDFIHK.G	2	0.490508	Hypothetical protein
YNR048W	YNR048W	S000005331	1.46	2.913	902.937	2	K.TEYN*ASDIVPPPNWAK.L	1	0.685914	Protein proposed to interact with phospholipid translocases, shares similarity to Cdc50p
YNR048W	YNR048W	S000005331	0.39	4.421	1223.09	2	K.VAVQPQWMVLTDPELGN*QTCR.I	1	0.685059	Protein proposed to interact with phospholipid translocases, shares similarity to Cdc50p
YOR389W	YOR389W	S000005916	0.02	2.706	517.252	3	K.EK#LN*LTDDGENER@.M	2	0.718719	Putative protein of unknown function; expression regulated by copper levels
YOR389W	YOR389W	S000005916	-0.51	3.369	798.843	2	R.FEPASN*NSDEFGSGK#.D	2	0.498754	Putative protein of unknown function; expression regulated by copper levels
YOR389W	YOR389W	S000005916	-0.2	2.853	639.788	2	K.LN*LTDDGENER.M	1	0.436544	Putative protein of unknown function; expression regulated by copper levels
YPS3	YLR121C	S000004111	0.3	2.308	532.823	2	K.R@N*ITLTTTK#.L	1	21.6276	Aspartic protease, attached to the plasma membrane via a glycosylphosphatidylinositol (GPI) anchor
YPS3	YLR121C	S000004111	-5.39	3.759	904.882	2	K.TLGYYEYTCPSSDN*K#.T	4	17.5123	Aspartic protease, attached to the plasma membrane via a glycosylphosphatidylinositol (GPI) anchor
YPS7	YDR349C	S000002757	-0.3	2.51	835.393	2	R.GNYYVN*STFGTPGQR@.Q	8	0.686961	Putative GPI-anchored aspartic protease, located in the cytoplasm and endoplasmic reticulum
YPS7	YDR349C	S000002757	1.34	2.786	1074.52	3	K.HPSYLM^N*DSTSSVPVSPGQIYEISFIDGR@.A	3	0.227179	Putative GPI-anchored aspartic protease, located in the cytoplasm and endoplasmic reticulum
YUR1	YJL139C	S000003675	-0.47	3.384	767.338	2	R.NSYDDYTLN*YTR@.Q	5	1.04016	Mannosyltransferase of the KTR1 family, involved in protein N-glycosylation; located in the Golgi apparatus
YUR1	YJL139C	S000003675	-1.15	2.396	1045.51	3	K.TQYALIPPEDWN*RPQWINDTLFEER.L	1	0.696309	Mannosyltransferase of the KTR1 family, involved in protein N-glycosylation; located in the Golgi apparatus
