# Supplementary material for: Quantification of tunicamycin-induced protein expression and N-glycosylation changes in yeast
Source: Royal Society of Chemistry journal article supplement (doi:10.1039/c6an00144k), 2016-01-01
Supplement: c6an00144k5.xlsx [file c6an00144k5.xlsx]

## Sheet: Unique Sites Quantified
Table S-7. Quantified 253 Unique Glycosylation Sites
Gene Symbol	Reference	SGD ID	PPM	XCorr	Obs m/z	z	ModScore Peptide	Site	ModScore	Peptide hits	Peptide H/L ratio	Annotation
ADP1	YCR011C	S000000604	-0.4	3.003	629.287	2	K.VFSGCN*VTNEK.I	165	73.311	5	0.896267	Putative ATP-dependent permease of the ABC transporter family of proteins
ALG12	YNR030W	S000005313	-0.17	3.145	485.58	3	K.TTNHWELVN*TTK.M	483	97.602	6	0.650085	Alpha-1,6-mannosyltransferase localized to the ER; responsible for the addition of the alpha-1,6 mannose to dolichol-linked Man7GlcNAc2, acts in the dolichol pathway for N-glycosylation
APE3	YBR286W	S000000490	4.02	3.651	1413.58	2	R.VFMDYDMMASPN*YEYEIYDANNK.E	393	82.387	2	1.37702	Vacuolar aminopeptidase Y, processed to mature form by Prb1p
APE3	YBR286W	S000000490	-0.99	3.435	824.924	2	K.AHHLN*YTLVPFDGR.S	427	1000	6	0.815185	Vacuolar aminopeptidase Y, processed to mature form by Prb1p
APE3	YBR286W	S000000490	-0.23	4.416	905.476	2	K.IKVDDLN*ATAWDLYR.L	85	1000	10	0.655288	Vacuolar aminopeptidase Y, processed to mature form by Prb1p
APE3	YBR286W	S000000490	0.26	2.117	1015.01	2	K.SFAN*TTAFALSPPVDGFVGK.L	162	1000	17	0.645639	Vacuolar aminopeptidase Y, processed to mature form by Prb1p
APE3	YBR286W	S000000490	0.65	5.599	897.764	3	R.FAWWAAEEEGLLGSNFYAYN*LTK.E	371	109.943	200	0.641891	Vacuolar aminopeptidase Y, processed to mature form by Prb1p
APE3	YBR286W	S000000490	-0.02	4.262	800.883	2	R.LAN*YSTPDYGHPTR.V	96	1000	8	0.635626	Vacuolar aminopeptidase Y, processed to mature form by Prb1p
APE3	YBR286W	S000000490	0.25	3.02	699.356	2	K.IISFN*LSDAETGK.S	150	1000	8	0.578044	Vacuolar aminopeptidase Y, processed to mature form by Prb1p
ATH1	YPR026W	S000006230	-0.06	4.888	993.433	2	K.YEN*STNPINSSESFEEK.D	370	53.534	4	1.04464	Acid trehalase required for utilization of extracellular trehalose
ATH1	YPR026W	S000006230	-0.28	3.6	720.665	3	R.SLIHDQDINFYN*GSENER.K	910	36.556	2	0.530896	Acid trehalase required for utilization of extracellular trehalose
AXL2	YIL140W	S000001402	1.66	3.726	1066.22	3	K.LGSINLLDAPDWVALDN*ATISGSVPDELLGK.N	304	32.999	2	1.37287	Integral plasma membrane protein required for axial budding in haploid cells, localizes to the incipient bud site and bud neck; glycosylated by Pmt4p; potential Cdc28p substrate
AXL2	YIL140W	S000001402	-1.7	3.745	751.396	2	K.FQSSN*LTLAGEVPK.N	403	1000	6	0.770678	Integral plasma membrane protein required for axial budding in haploid cells, localizes to the incipient bud site and bud neck; glycosylated by Pmt4p; potential Cdc28p substrate
AXL2	YIL140W	S000001402	0.4	4.495	902.425	2	R.VNESFTFQISN*DTYK.S	50	162.445	2	0.70745	Integral plasma membrane protein required for axial budding in haploid cells, localizes to the incipient bud site and bud neck; glycosylated by Pmt4p; potential Cdc28p substrate
AXL2	YIL140W	S000001402	0.92	3.282	670.353	3	K.NALKLDPNEVFN*VTFDR.S	163	99.228	5	0.440648	Integral plasma membrane protein required for axial budding in haploid cells, localizes to the incipient bud site and bud neck; glycosylated by Pmt4p; potential Cdc28p substrate
BAR1	YIL015W	S000001277	0.03	5.046	1298.3	3	K.FSGDLFTFPMVNEYPTIVDAPATLAMTIQGLGAQN*K.S	268	94.023	3	0.555978	Aspartyl protease secreted into the periplasmic space of mating type a cells, helps cells find mating partners, cleaves and inactivates alpha factor allowing cells to recover from alpha-factor-induced cell cycle arrest
BAR1	YIL015W	S000001277	-0.28	4.34	814.916	2	K.ISLAQANWN*ASEVSK.K	398	48.874	6	0.439794	Aspartyl protease secreted into the periplasmic space of mating type a cells, helps cells find mating partners, cleaves and inactivates alpha factor allowing cells to recover from alpha-factor-induced cell cycle arrest
CHS3	YBR023C	S000000227	0.22	2.353	690.81	4	K.NQDGSSKPN*FTVENYAGWNCHTSK.E	332	19.607	2	2.47469	Chitin synthase III, catalyzes the transfer of N-acetylglucosamine (GlcNAc) to chitin; required for synthesis of the majority of cell wall chitin, the chitin ring during bud emergence, and spore wall chitosan
CHS3	YBR023C	S000000227	-0.64	3.909	1192.01	2	K.SN*SSIPHDDDNNLAWYFPCK.L	303	49.312	1	0.775339	Chitin synthase III, catalyzes the transfer of N-acetylglucosamine (GlcNAc) to chitin; required for synthesis of the majority of cell wall chitin, the chitin ring during bud emergence, and spore wall chitosan
CPR4	YCR069W	S000000665	1.1	3.576	1113.03	2	R.LAMAYFGPDSN*TSEFIITTK.A	166	1000	1	0.0134663	Peptidyl-prolyl cis-trans isomerase (cyclophilin), catalyzes the cis-trans isomerization of peptide bonds N-terminal to proline residues; has a potential role in the secretory pathway
CPS1	YJL172W	S000003708	0.46	2.627	543.026	4	K.HSVDTILHDPAFRN*SSIEK.L	88	1000	2	0.820372	Vacuolar carboxypeptidase yscS; expression is induced under low-nitrogen conditions
CPS1	YJL172W	S000003708	-1.75	3.252	731.381	2	K.LVEYISN*QSHLR.S	381	1000	1	0.591397	Vacuolar carboxypeptidase yscS; expression is induced under low-nitrogen conditions
CPS1	YJL172W	S000003708	-0.49	1.717	488.736	2	K.YYWN*LSK.N	525	1000	1	0.452943	Vacuolar carboxypeptidase yscS; expression is induced under low-nitrogen conditions
CRH1	YGR189C	S000003421	-0.58	2.927	780.339	2	K.FHN*YTLDWAMDK.T	177	1000	8	1.4569	Putative chitin transglycosidase, cell wall protein that functions in the transfer of chitin to beta(1-6)glucan; localizes to sites of polarized growth; expression is induced under cell wall stress conditions
CWH41	YGL027C	S000002995	0.37	2.994	668.368	2	K.NNLN*LTVYFVK.S	122	48.874	4	0.423314	Processing alpha glucosidase I, ER type II integral membrane N-glycoprotein involved in assembly of cell wall beta 1,6 glucan and asparagine-linked protein glycosylation; also involved in ER protein quality control and sensing of ER stress
CWH41	YGL027C	S000002995	-0.18	3.317	753.384	2	K.FTN*ESLLWAPYR.S	42	1000	4	0.312429	Processing alpha glucosidase I, ER type II integral membrane N-glycoprotein involved in assembly of cell wall beta 1,6 glucan and asparagine-linked protein glycosylation; also involved in ER protein quality control and sensing of ER stress
DAP2	YHR028C	S000001070	-0.46	4.59	1068.49	3	R.YMHTPQENFDGYVESSVHN*VTALAQANR.F	738	71.949	5	0.782358	Dipeptidyl aminopeptidase, synthesized as a glycosylated precursor; localizes to the vacuolar membrane; similar to Ste13p
DAP2	YHR028C	S000001070	0.9	3.091	655.288	4	K.SIPHHSNTPDYQEPNSN*YTNDGK.L	63	13.208	1	0.462075	Dipeptidyl aminopeptidase, synthesized as a glycosylated precursor; localizes to the vacuolar membrane; similar to Ste13p
DAP2	YHR028C	S000001070	1.9	5.526	1148.6	2	K.TFIHNGQN*LTVESITASPDLK.R	139	53.534	1	0.357695	Dipeptidyl aminopeptidase, synthesized as a glycosylated precursor; localizes to the vacuolar membrane; similar to Ste13p
DCW1	YKL046C	S000001529	-0.12	3.883	1243.6	3	K.VTSYQWTYNQGLLLAGSAYLYN*FTGSDLWHTR.T	265	52.391	2	0.814846	Putative mannosidase, GPI-anchored membrane protein required for cell wall biosynthesis in bud formation;homologous to Dfg5p
DCW1	YKL046C	S000001529	-0.3	5.694	1193.19	3	K.EFLN*ASQVFFHDGIVYEAACQGPNSCNTDQR.S	281	115.342	5	0.78922	Putative mannosidase, GPI-anchored membrane protein required for cell wall biosynthesis in bud formation;homologous to Dfg5p
DCW1	YKL046C	S000001529	-0.15	4.43	826.356	2	K.YVYDGVSIDDN*CTK.V	240	1000	4	0.761861	Putative mannosidase, GPI-anchored membrane protein required for cell wall biosynthesis in bud formation;homologous to Dfg5p
DCW1	YKL046C	S000001529	1.39	4.025	793.362	2	R.YTGN*QTYVDWAEK.V	203	1000	6	0.571688	Putative mannosidase, GPI-anchored membrane protein required for cell wall biosynthesis in bud formation;homologous to Dfg5p
DCW1	YKL046C	S000001529	3.7	4.017	861.446	2	R.NQIMSWLN*TSAIAAAK.S	337	115.974	7	0.569276	Putative mannosidase, GPI-anchored membrane protein required for cell wall biosynthesis in bud formation;homologous to Dfg5p
DCW1	YKL046C	S000001529	0.96	3.758	996.488	2	K.VYEWMVGVNLISN*GTYK.Y	225	59.298	3	0.567936	Putative mannosidase, GPI-anchored membrane protein required for cell wall biosynthesis in bud formation;homologous to Dfg5p
DDR48	YMR173W	S000004784	-6.04	3.989	894.352	3	K.SSYGSNN*DDSYGSNNDDSYGSSNKK.K	185	16.198	1	7.73017	DNA damage-responsive protein, expression is increased in response to heat-shock stress or treatments that produce DNA lesions; contains multiple repeats of the amino acid sequence NNNDSYGS
DDR48	YMR173W	S000004784	-1.08	4.524	1170.96	2	K.N*SYGSSNYGSSNNDDSYGSSNR.G	397	31.275	1	4.50179	DNA damage-responsive protein, expression is increased in response to heat-shock stress or treatments that produce DNA lesions; contains multiple repeats of the amino acid sequence NNNDSYGS
DEF1	YKL054C	S000001537	-6.53	5.533	1208.52	3	K.NNYN*YYQTQNGQEQQSPNQGVAQHSEDSQQK.Q	634	27.121	1	0.700569	RNAPII degradation factor, forms a complex with Rad26p in chromatin, enables ubiquitination and proteolysis of RNAPII present in an elongation complex; mutant is deficient in Zip1p loading onto chromosomes during meiosis
DEF1	YKL054C	S000001537	-7.28	6.146	1208.52	3	K.NNYNYYQTQN*GQEQQSPNQGVAQHSEDSQQK.Q	640	15.381	1	0.694141	RNAPII degradation factor, forms a complex with Rad26p in chromatin, enables ubiquitination and proteolysis of RNAPII present in an elongation complex; mutant is deficient in Zip1p loading onto chromosomes during meiosis
DFG16	YOR030W	S000005556	-0.3	4.36	869.44	2	R.AYN*YTLNYPSFLIR.C	110	97.748	2	1.18838	Probable multiple transmembrane protein, involved in diploid invasive and pseudohyphal growth upon nitrogen starvation; required for accumulation of processed Rim101p
DFG5	YMR238W	S000004851	-0.04	3.512	765.697	3	K.GDANAGMNSSTTN*VLQNNLNIK.K	422	14.003	1	0.872847	Putative mannosidase, essential glycosylphosphatidylinositol (GPI)-anchored membrane protein required for cell wall biogenesis in bud formation, involved in filamentous growth, homologous to Dcw1p
DFG5	YMR238W	S000004851	0.94	5.672	1140.05	2	K.GDANAGMN*SSTTNVLQNNLNIK.K	417	59.298	11	0.797911	Putative mannosidase, essential glycosylphosphatidylinositol (GPI)-anchored membrane protein required for cell wall biogenesis in bud formation, involved in filamentous growth, homologous to Dcw1p
DSE4	YNR067C	S000005350	-0.52	2.658	550.771	2	K.LN*GTWAADNK.D	886	109.529	5	0.386436	Daughter cell-specific secreted protein with similarity to glucanases, degrades cell wall from the daughter side causing daughter to separate from mother
ECM33	YBR078W	S000000282	-0.73	1.467	1170.11	2	K.VQTVGGAIEVTGN*FSTLDLSSLK.S	304	1000	223	0.451532	GPI-anchored protein of unknown function, has a possible role in apical bud growth; GPI-anchoring on the plasma membrane crucial to function; phosphorylated in mitochondria; similar to Sps2p and Pst1p
ECM33	YBR078W	S000000282	-10.48	3.655	1120.58	2	K.AAFSNLTTVGGGFIIAN*NTQLK.V	279	24.437	1	0.360008	GPI-anchored protein of unknown function, has a possible role in apical bud growth; GPI-anchoring on the plasma membrane crucial to function; phosphorylated in mitochondria; similar to Sps2p and Pst1p
ECM33	YBR078W	S000000282	-1.07	5.534	937.403	2	R.GGANFDSSSSN*FSCNALK.K	328	76.733	11	0.340753	GPI-anchored protein of unknown function, has a possible role in apical bud growth; GPI-anchoring on the plasma membrane crucial to function; phosphorylated in mitochondria; similar to Sps2p and Pst1p
ECM38	YLR299W	S000004290	0.45	2.136	617.3	3	K.EDWSFVLN*STHDGVLK.E	270	1000	3	0.667667	Gamma-glutamyltranspeptidase, major glutathione-degrading enzyme; involved in detoxification of electrophilic xenobiotics; expression induced mainly by nitrogen starvation
EGT2	YNL327W	S000005271	-1.37	4.061	1401.68	2	K.GSQQN*ITFQVPDAFSSFPQEPFSIK.H	65	1000	4	1.23773	Glycosylphosphatidylinositol (GPI)-anchored cell wall endoglucanase required for proper cell separation after cytokinesis, expression is activated by Swi5p and tightly regulated in a cell cycle-dependent manner
ENO2	YHR174W	S000001217	4.12	4.748	974.518	2	K.GVMNAVNN*VNNVIAAAFVK.A	68	24.437	2	1.59676	Enolase II, a phosphopyruvate hydratase that catalyzes the conversion of 2-phosphoglycerate to phosphoenolpyruvate during glycolysis and the reverse reaction during gluconeogenesis; expression is induced in response to glucose
ENO2	YHR174W	S000001217	0.4	4.278	982.512	2	K.GVMN*AVNNVNNVIAAAFVK.A	64	53.534	6	1.58277	Enolase II, a phosphopyruvate hydratase that catalyzes the conversion of 2-phosphoglycerate to phosphoenolpyruvate during glycolysis and the reverse reaction during gluconeogenesis; expression is induced in response to glucose
ENO2	YHR174W	S000001217	-2.34	4.467	982.509	2	K.GVMNAVN*NVNNVIAAAFVK.A	67	24.437	4	1.55919	Enolase II, a phosphopyruvate hydratase that catalyzes the conversion of 2-phosphoglycerate to phosphoenolpyruvate during glycolysis and the reverse reaction during gluconeogenesis; expression is induced in response to glucose
ENO2	YHR174W	S000001217	-1.12	4.606	978.52	2	K.GVMNAVNNVNN*VIAAAFVK.A	71	24.437	1	1.44653	Enolase II, a phosphopyruvate hydratase that catalyzes the conversion of 2-phosphoglycerate to phosphoenolpyruvate during glycolysis and the reverse reaction during gluconeogenesis; expression is induced in response to glucose
ENO2	YHR174W	S000001217	1.1	5.727	982.513	2	K.GVMNAVNNVN*NVIAAAFVK.A	70	24.437	1	1.36803	Enolase II, a phosphopyruvate hydratase that catalyzes the conversion of 2-phosphoglycerate to phosphoenolpyruvate during glycolysis and the reverse reaction during gluconeogenesis; expression is induced in response to glucose
ENO2	YHR174W	S000001217	1.69	3.45	712.401	2	K.LGAN*AILGVSMAAAR.A	109	1000	1	0.956741	Enolase II, a phosphopyruvate hydratase that catalyzes the conversion of 2-phosphoglycerate to phosphoenolpyruvate during glycolysis and the reverse reaction during gluconeogenesis; expression is induced in response to glucose
EPS1	YIL005W	S000001267	0.4	2.132	644.326	2	K.FPN*ITEGELEK.K	299	1000	3	0.451094	ER protein with chaperone and co-chaperone activity, involved in retention of resident ER proteins; has a role in recognizing proteins targeted for ER-associated degradation (ERAD), member of the protein disulfide isomerase family
ERG3	YLR056W	S000004046	-0.89	5.221	1124.09	2	K.LLGLNSGFSN*STILQETLNSK.N	45	51.004	3	0.411054	C-5 sterol desaturase, catalyzes the introduction of a C-5(6) double bond into episterol, a precursor in ergosterol biosynthesis; mutants are viable, but cannot grow on non-fermentable carbon sources
ERO1	YML130C	S000004599	-0.16	3.148	597.305	2	R.YTIENIN*STK.E	458	48.874	4	2.66946	Thiol oxidase required for oxidative protein folding in the endoplasmic reticulum
ERO1	YML130C	S000004599	-0.75	2.753	742.901	2	K.AEIVPRPSN*GTVNK.W	491	76.733	2	1.83668	Thiol oxidase required for oxidative protein folding in the endoplasmic reticulum
ERO1	YML130C	S000004599	0.36	1.613	503.235	3	K.TN*NSQSHVFDDLK.M	468	19.843	4	1.12023	Thiol oxidase required for oxidative protein folding in the endoplasmic reticulum
EUG1	YDR518W	S000002926	1.14	5.715	1227.98	3	K.SLSIHLPN*TTEPILFDGNVDSLVGNSVALTQWLK.V	207	26.045	3	0.63047	Protein disulfide isomerase of the endoplasmic reticulum lumen, function overlaps with that of Pdi1p; may interact with nascent polypeptides in the ER
EXG2	YDR261C	S000002669	0.27	5.394	1092.99	4	R.YDGSYYNTTLFTTNDKPVGTCISQN*SLADWTQDYRDR.V	419	14.564	1	0.871758	Exo-1,3-beta-glucanase, involved in cell wall beta-glucan assembly; may be anchored to the plasma membrane via a glycosylphosphatidylinositol (GPI) anchor
EXG2	YDR261C	S000002669	0.58	3.545	752.371	2	K.FASYYAN*DTITVK.G	50	1000	5	0.756074	Exo-1,3-beta-glucanase, involved in cell wall beta-glucan assembly; may be anchored to the plasma membrane via a glycosylphosphatidylinositol (GPI) anchor
EXG2	YDR261C	S000002669	4.01	4.781	1366.62	3	R.YDGSYYN*TTLFTTNDKPVGTCISQNSLADWTQDYR.D	401	29.376	3	0.753667	Exo-1,3-beta-glucanase, involved in cell wall beta-glucan assembly; may be anchored to the plasma membrane via a glycosylphosphatidylinositol (GPI) anchor
EXG2	YDR261C	S000002669	0.43	3.664	978.451	2	K.EANLFPSPFDN*YTYFK.A	480	99.228	4	0.515985	Exo-1,3-beta-glucanase, involved in cell wall beta-glucan assembly; may be anchored to the plasma membrane via a glycosylphosphatidylinositol (GPI) anchor
EXG2	YDR261C	S000002669	-0.16	2.007	616.655	3	K.TLGYN*TSLTLLDNHFK.T	106	33.19	1	0.487238	Exo-1,3-beta-glucanase, involved in cell wall beta-glucan assembly; may be anchored to the plasma membrane via a glycosylphosphatidylinositol (GPI) anchor
EXG2	YDR261C	S000002669	-1.24	3.406	1092.99	4	R.YDGSYYNTTLFTTN*DKPVGTCISQNSLADWTQDYRDR.V	408	14.564	1	0.485284	Exo-1,3-beta-glucanase, involved in cell wall beta-glucan assembly; may be anchored to the plasma membrane via a glycosylphosphatidylinositol (GPI) anchor
EXG2	YDR261C	S000002669	0.22	3.7	1227.11	2	K.NLYIDN*ITFNDPYVSDGLQLK.Y	157	27.055	4	0.468444	Exo-1,3-beta-glucanase, involved in cell wall beta-glucan assembly; may be anchored to the plasma membrane via a glycosylphosphatidylinositol (GPI) anchor
FET3	YMR058W	S000004662	0.17	2.73	388.957	4	R.YTVLVHTKN*DTDK.N	265	1000	4	0.531172	Ferro-O2-oxidoreductase required for high-affinity iron uptake and involved in mediating resistance to copper ion toxicity, belongs to class of integral membrane multicopper oxidases
FET3	YMR058W	S000004662	0.99	4.35	1131.89	3	K.VPTLMTVLSSGDQAN*NSEIYGSNTHTFILEK.D	381	30.835	2	0.389933	Ferro-O2-oxidoreductase required for high-affinity iron uptake and involved in mediating resistance to copper ion toxicity, belongs to class of integral membrane multicopper oxidases
FET3	YMR058W	S000004662	0.97	5.223	1131.89	3	K.VPTLMTVLSSGDQANN*SEIYGSNTHTFILEK.D	382	17.009	1	0.389933	Ferro-O2-oxidoreductase required for high-affinity iron uptake and involved in mediating resistance to copper ion toxicity, belongs to class of integral membrane multicopper oxidases
FET3	YMR058W	S000004662	0.21	3.058	771.89	2	K.N*VTDMLYITVAQR.Y	244	1000	1	0.0809458	Ferro-O2-oxidoreductase required for high-affinity iron uptake and involved in mediating resistance to copper ion toxicity, belongs to class of integral membrane multicopper oxidases
FET5	YFL041W	S000001853	-1.52	3.875	794.904	2	K.YAFFNN*ITYVTPK.V	364	24.437	1	0.607898	Multicopper oxidase, integral membrane protein with similarity to Fet3p; may have a role in iron transport
FET5	YFL041W	S000001853	-0.53	3.822	673.661	3	K.LN*YTASWVTANPDGLHEK.R	24	166.516	4	0.543876	Multicopper oxidase, integral membrane protein with similarity to Fet3p; may have a role in iron transport
FMP45	YDL222C	S000002381	0.06	4.859	1273.5	2	R.WYNYNWCGYEDGQLAN*CSSR.A	73	164.775	10	1.87261	Integral membrane protein localized to mitochondria (untagged protein) and eisosomes, immobile patches at the cortex associated with endocytosis; sporulation and sphingolipid content are altered in mutants; has homologs SUR7 and YNL194C
GAA1	YLR088W	S000004078	-0.4	2.046	623.753	2	K.EMVN*MTSMER.N	87	1000	9	0.61149	Subunit of the GPI (glycosylphosphatidylinositol):protein transamidase complex, removes the GPI-anchoring signal and attaches GPI to proteins in the ER
GAS1	YMR307W	S000004924	-0.13	4.045	1119.54	2	K.N*LSIPVFFSEYGCNEVTPR.L	253	78.616	5	0.565422	Beta-1,3-glucanosyltransferase, required for cell wall assembly; localizes to the cell surface via a glycosylphosphatidylinositol (GPI) anchor
GAS1	YMR307W	S000004924	0.85	3.21	900.906	2	R.VYAIN*TTLDHSECMK.A	95	1000	39	0.535961	Beta-1,3-glucanosyltransferase, required for cell wall assembly; localizes to the cell surface via a glycosylphosphatidylinositol (GPI) anchor
GAS1	YMR307W	S000004924	2.17	6.623	1027.45	3	R.GVAYQADTAN*ETSGSTVNDPLANYESCSR.D	57	91.069	46	0.522662	Beta-1,3-glucanosyltransferase, required for cell wall assembly; localizes to the cell surface via a glycosylphosphatidylinositol (GPI) anchor
GAS1	YMR307W	S000004924	-0.62	2.33	823.38	2	K.FFYSNN*GSQFYIR.G	40	24.437	11	0.420332	Beta-1,3-glucanosyltransferase, required for cell wall assembly; localizes to the cell surface via a glycosylphosphatidylinositol (GPI) anchor
GAS1	YMR307W	S000004924	0.73	2.239	480.79	2	K.KLN*TNVIR.V	85	30.835	2	0.366923	Beta-1,3-glucanosyltransferase, required for cell wall assembly; localizes to the cell surface via a glycosylphosphatidylinositol (GPI) anchor
GAS1	YMR307W	S000004924	0.4	1.458	1027.45	3	R.GVAYQADTANETSGSTVN*DPLANYESCSR.D	65	14.461	1	0.154631	Beta-1,3-glucanosyltransferase, required for cell wall assembly; localizes to the cell surface via a glycosylphosphatidylinositol (GPI) anchor
GAS3	YMR215W	S000004828	-0.8	4.155	1214.59	2	K.LN*STFEDAVIPLIFSEYGCNK.N	269	147.336	4	0.240482	Putative 1,3-beta-glucanosyltransferase, has similarity to Gas1p; localizes to the cell wall
GAS3	YMR215W	S000004828	0.25	2.176	931.987	2	K.ILTDYAVPTTFN*YTIK.N	422	1000	1	0.0480074	Putative 1,3-beta-glucanosyltransferase, has similarity to Gas1p; localizes to the cell wall
GAS5	YOL030W	S000005390	-6.66	5.012	1249.05	2	R.GVDYQPGGSSN*LTDPLADASVCDR.D	60	1000	6	0.500902	1,3-beta-glucanosyltransferase, has similarity to Gas1p; localizes to the cell wall
GAS5	YOL030W	S000005390	0.28	5.441	881.694	3	K.VSNPEGNGGYSTSNN*YSTCPDYEK.G	344	17.009	2	0.398003	1,3-beta-glucanosyltransferase, has similarity to Gas1p; localizes to the cell wall
GDA1	YEL042W	S000000768	-0.55	2.946	708.692	3	K.THQLSSPCLPPKVN*ATNEK.V	335	16.062	1	20.9896	Guanosine diphosphatase located in the Golgi, involved in the transport of GDP-mannose into the Golgi lumen by converting GDP to GMP after mannose is transferred its substrate
GDA1	YEL042W	S000000768	2.93	2.873	752.358	3	K.FGDEN*YTLYQFSHLGYGLK.E	280	1000	11	0.341747	Guanosine diphosphatase located in the Golgi, involved in the transport of GDP-mannose into the Golgi lumen by converting GDP to GMP after mannose is transferred its substrate
GNT1	YOR320C	S000005847	-0.26	3.249	692.853	2	K.LLVFN*QTEFDR.V	187	1000	3	0.385553	N-acetylglucosaminyltransferase capable of modification of N-linked glycans in the Golgi apparatus
GNT1	YOR320C	S000005847	1.9	4.648	1105.52	2	K.TLDNDGNDIPVGLN*DSVAYSK.Y	425	64.398	2	0.29882	N-acetylglucosaminyltransferase capable of modification of N-linked glycans in the Golgi apparatus
GPI13	YLL031C	S000003954	4.01	4.89	1284.6	3	R.FDFAIPVNESHSN*YNLNYHNNILSLYDSFASDK.D	105	13.38	1	1.69925	ER membrane localized phosphoryltransferase that adds phosphoethanolamine onto the third mannose residue of the glycosylphosphatidylinositol (GPI) anchor precursor; similar to human PIG-O protein
GPI13	YLL031C	S000003954	1.55	4.263	787.882	2	R.HVLDNISSQN*ETSK.L	71	51.004	1	0.6447	ER membrane localized phosphoryltransferase that adds phosphoethanolamine onto the third mannose residue of the glycosylphosphatidylinositol (GPI) anchor precursor; similar to human PIG-O protein
GPI16	YHR188C	S000001231	1.21	3.859	620.308	3	R.RSYASDIGAPLFN*STEK.L	184	1000	6	0.674785	Transmembrane protein subunit of the glycosylphosphatidylinositol transamidase complex that adds GPIs to newly synthesized proteins; human PIG-Tp homolog
GPI17	YDR434W	S000002842	-3.14	6.308	1176.25	3	R.VPWSLQVLPYN*ETIEQMESEGNQFHVVTLK.L	100	110.756	2	0.57427	Transmembrane protein subunit of the glycosylphosphatidylinositol transamidase complex that adds GPIs to newly synthesized proteins; human PIG-Sp homolog
GTB1	YDR221W	S000002629	0.3	5.097	934.78	3	R.GEYFNQLSHDPILYQFEQLN*STR.L	240	183.987	6	0.721639	Glucosidase II beta subunit, forms a complex with alpha subunit Rot2p, involved in removal of two glucose residues from N-linked glycans during glycoprotein biogenesis in the ER
GTB1	YDR221W	S000002629	2.17	3.29	802.376	2	K.TFEYEPPKFN*LSE.-	699	1000	2	0.0448499	Glucosidase II beta subunit, forms a complex with alpha subunit Rot2p, involved in removal of two glucose residues from N-linked glycans during glycoprotein biogenesis in the ER
HEH2	YDR458C	S000002866	-0.42	3.141	688.847	2	K.SKSN*NTNYIYR.S	520	24.437	4	0.941707	Inner nuclear membrane (INM) protein; contains helix-extension-helix (HEH) motif, nuclear localization signal sequence; targeting to the INM requires the Srp1p-Kap95p karyopherins and the Ran cycle
HMG2	YLR450W	S000004442	-0.9	2.828	750.725	3	R.YLLSEEPKIPTELVSEN*GTK.W	150	1000	4	0.758647	One of two isozymes of HMG-CoA reductase that convert HMG-CoA to mevalonate, a rate-limiting step in sterol biosynthesis; overproduction induces assembly of peripheral ER membrane arrays and short nuclear-associated membrane stacks
KRE2	YDR483W	S000002891	0.47	2.199	860.897	2	K.EHWSYPEWIN*QTK.A	197	1000	8	0.34801	Alpha1,2-mannosyltransferase of the Golgi involved in protein mannosylation
KRE5	YOR336W	S000005863	1.48	4.134	1488.66	2	K.YTPNYFADSVYSSVN*NTALESVCSER.I	644	24.437	3	0.893414	Protein required for beta-1,6 glucan biosynthesis; mutations result in aberrant morphology and severe growth defects
KRE5	YOR336W	S000005863	1.16	5.559	1079.06	2	K.SVEYPLTHPLEITLQN*GSR.M	228	1000	5	0.831334	Protein required for beta-1,6 glucan biosynthesis; mutations result in aberrant morphology and severe growth defects
KRE5	YOR336W	S000005863	0.09	2.368	563.798	2	K.DITATLN*FTK.S	293	1000	2	0.807257	Protein required for beta-1,6 glucan biosynthesis; mutations result in aberrant morphology and severe growth defects
KRE5	YOR336W	S000005863	0.49	2.168	825.474	2	R.FLFLDVLLPQN*ISK.V	1195	1000	3	0.634372	Protein required for beta-1,6 glucan biosynthesis; mutations result in aberrant morphology and severe growth defects
KRE5	YOR336W	S000005863	0	2.153	573.287	2	K.N*STDNLTELK.S	519	34.073	1	0.564913	Protein required for beta-1,6 glucan biosynthesis; mutations result in aberrant morphology and severe growth defects
KRE6	YPR159W	S000006363	-0.81	3.187	759.04	3	K.DLEWYSPDASTTVN*GTLQLR.M	374	1000	3	0.815185	Protein required for beta-1,6 glucan biosynthesis; putative beta-glucan synthase; appears functionally redundant with Skn1p
KTR1	YOR099W	S000005625	-0.49	2.851	594.826	2	K.N*VTSALVSGTTK.Y	120	1000	3	0.528253	Alpha-1,2-mannosyltransferase involved in O- and N-linked protein glycosylation; type II membrane protein; member of the KRE2/MNT1 mannosyltransferase family
KTR6	YPL053C	S000005974	-0.2	3.762	1123.53	2	K.SYGGN*ETTLGFMVPSYINHR.G	98	145.045	11	0.475231	Probable mannosylphosphate transferase involved in the synthesis of core oligosaccharides in protein glycosylation pathway; member of the KRE2/MNT1 mannosyltransferase family
KTR7	YIL085C	S000001347	0.52	3.295	586.788	2	K.MN*ASFVMLTR.N	89	1000	3	0.356284	Putative mannosyltransferase involved in protein glycosylation; member of the KRE2/MNT1 mannosyltransferase family
LEM3	YNL323W	S000005267	-1.2	3.608	1009.51	2	K.TKYN*YTQIAPPPYWEK.M	279	1000	10	0.500312	Membrane protein of the plasma membrane and ER, involved in translocation of phospholipids and alkylphosphocholine drugs across the plasma membrane
LEM3	YNL323W	S000005267	-1.69	4.251	1366.31	3	K.IYYPCGLIANSMFN*DTFPLQLTNVGDTSNNYSLTNK.G	240	33.657	1	0.363418	Membrane protein of the plasma membrane and ER, involved in translocation of phospholipids and alkylphosphocholine drugs across the plasma membrane
LHS1	YKL073W	S000001556	-0.24	4.127	788.375	2	K.LSN*ESELYDVFTR.G	458	1000	5	0.780462	Molecular chaperone of the endoplasmic reticulum lumen, involved in polypeptide translocation and folding; member of the Hsp70 family; localizes to the lumen of the ER; regulated by the unfolded protein response pathway
LRO1	YNR008W	S000005291	-1.03	6.008	1063.98	2	K.SSSEDALNN*NTDTYGNFIR.F	439	24.437	3	0.54514	Acyltransferase that catalyzes diacylglycerol esterification; one of several acyltransferases that contribute to triglyceride synthesis; putative homolog of human lecithin cholesterol acyltransferase
LRO1	YNR008W	S000005291	1.39	4.58	755.709	3	K.WAQGASPYNPAGIN*VTIVEMK.H	594	94.163	4	0.36516	Acyltransferase that catalyzes diacylglycerol esterification; one of several acyltransferases that contribute to triglyceride synthesis; putative homolog of human lecithin cholesterol acyltransferase
MCD4	YKL165C	S000001648	1.77	6.572	1267.31	3	R.TPLVAWGAGLNKPVHNPFPVSDN*YTENWELSSIK.R	312	33.657	3	2.06895	Protein involved in glycosylphosphatidylinositol (GPI) anchor synthesis; multimembrane-spanning protein that localizes to the endoplasmic reticulum; highly conserved among eukaryotes
MCD4	YKL165C	S000001648	1.3	4.415	1112.52	3	K.SNPVNFDSFFN*QSTHTYSFGSPDILPMFK.D	138	56.026	9	1.01094	Protein involved in glycosylphosphatidylinositol (GPI) anchor synthesis; multimembrane-spanning protein that localizes to the endoplasmic reticulum; highly conserved among eukaryotes
MID1	YNL291C	S000005235	4.91	3.841	1138.25	3	K.NVMATGQQTIINSDSIYEWTPILSN*ITAGKK.D	70	34.768	1	0.756232	N-glycosylated integral membrane protein of the ER membrane and plasma membrane, functions as a stretch-activated Ca2+-permeable cation channel required for Ca2+ influx stimulated by pheromone; interacts with Cch1p; forms an oligomer
MID1	YNL291C	S000005235	0.92	4.211	766.708	3	K.TLMAQTYDHIAEALYAN*FSK.A	407	1000	7	0.615018	N-glycosylated integral membrane protein of the ER membrane and plasma membrane, functions as a stretch-activated Ca2+-permeable cation channel required for Ca2+ influx stimulated by pheromone; interacts with Cch1p; forms an oligomer
MKC7	YDR144C	S000002551	0.18	2.815	513.926	3	K.GDKEDN*LTTLTTTK.I	346	1000	2	0.430296	GPI-anchored aspartyl protease (yapsin) involved in protein processing; shares functions with Yap3p and Kex2p
MKC7	YDR144C	S000002551	-0.47	3.668	758.842	2	K.STAYSLFAN*DSDSK.H	286	1000	7	0.396447	GPI-anchored aspartyl protease (yapsin) involved in protein processing; shares functions with Yap3p and Kex2p
MNL1	YHR204W	S000001247	-0.57	3.134	654.987	3	K.HSPVLTSN*GTREEDEFK.M	762	1000	1	0.819661	Alpha mannosidase-like protein of the endoplasmic reticulum required for degradation of glycoproteins but not for processing of N-linked oligosaccharides
MNL1	YHR204W	S000001247	-0.17	2.424	610.285	3	K.FN*NSVYSSHLEICQK.K	517	19.843	3	0.617196	Alpha mannosidase-like protein of the endoplasmic reticulum required for degradation of glycoproteins but not for processing of N-linked oligosaccharides
MNN1	YER001W	S000000803	-3.16	5.766	962.711	4	R.SPDFKPVENNYDN*STNVPQEIWFLDVSNTIHPK.W	383	38.371	4	0.172247	Alpha-1,3-mannosyltransferase, integral membrane glycoprotein of the Golgi complex, required for addition of alpha1,3-mannose linkages to N-linked and O-linked oligosaccharides, one of five S. cerevisiae proteins of the MNN1 family
MNN1	YER001W	S000000803	1.75	4.735	884.415	2	K.TLN*ATFPNYDPDNFK.K	225	65.44	1	0.0534821	Alpha-1,3-mannosyltransferase, integral membrane glycoprotein of the Golgi complex, required for addition of alpha1,3-mannose linkages to N-linked and O-linked oligosaccharides, one of five S. cerevisiae proteins of the MNN1 family
MNN1	YER001W	S000000803	-1.21	2.516	789.029	3	K.MFPFINN*FTTETFHEMVPK.I	254	17.009	1	0.0370059	Alpha-1,3-mannosyltransferase, integral membrane glycoprotein of the Golgi complex, required for addition of alpha1,3-mannose linkages to N-linked and O-linked oligosaccharides, one of five S. cerevisiae proteins of the MNN1 family
MNN4	YKL201C	S000001684	-0.38	2.81	688.839	2	K.SMN*QTTLDQVTK.I	915	1000	4	0.825878	Putative positive regulator of mannosylphosphate transferase (Mnn6p), involved in mannosylphosphorylation of N-linked oligosaccharides; expression increases in late-logarithmic and stationary growth phases
MNN5	YJL186W	S000003722	-0.77	3.508	609.655	3	K.FTDTLSGKLN*FSIPQR.E	136	1000	5	0.405535	Alpha-1,2-mannosyltransferase, responsible for addition of the second alpha-1,2-linked mannose of the branches on the mannan backbone of oligosaccharides, localizes to an early Golgi compartment
MNS1	YJR131W	S000003892	0.16	3.329	715.041	3	R.MLGGLLSAYHLSDVLEVGN*K.T	155	1000	2	0.444175	Alpha-1,2-mannosidase involved in ER quality control; catalyzes the removal of one mannose residue from Man9GlcNAc to produce a single isomer of Man8GlcNAc in N-linked oligosaccharide biosynthesis; integral to ER membrane
MNS1	YJR131W	S000003892	1.02	2.158	537.28	2	K.YLAYLTGN*R.T	224	1000	3	0.00651599	Alpha-1,2-mannosidase involved in ER quality control; catalyzes the removal of one mannose residue from Man9GlcNAc to produce a single isomer of Man8GlcNAc in N-linked oligosaccharide biosynthesis; integral to ER membrane
MNT3	YIL014W	S000001276	0.01	6.651	1149.53	3	R.SYDYCFLSGQLDPTAIFAN*STVNPHDLQNR.M	168	45.026	1	0.698775	Alpha-1,3-mannosyltransferase, adds the fourth and fifth alpha-1,3-linked mannose residues to O-linked glycans during protein O-glycosylation
MPD2	YOL088C	S000005448	0.4	2.687	800.696	3	K.SIEQYFDICNRN*DSYTMIK.Y	43	20.167	2	1.01182	Member of the protein disulfide isomerase (PDI) family, exhibits chaperone activity; overexpression suppresses the lethality of a pdi1 deletion but does not complement all Pdi1p functions; undergoes oxidation by Ero1p
MRL1	YPR079W	S000006283	0.22	3.755	1161.05	2	K.AQISYIGNLHN*CSYFFEVR.S	215	37.54	4	0.879954	Membrane protein with similarity to mammalian mannose-6-phosphate receptors, possibly functions as a sorting receptor in the delivery of vacuolar hydrolases
MRL1	YPR079W	S000006283	-0.07	2.904	630.249	2	K.YEN*GSMCPNGK.D	178	87.265	2	0.578906	Membrane protein with similarity to mammalian mannose-6-phosphate receptors, possibly functions as a sorting receptor in the delivery of vacuolar hydrolases
NCR1	YPL006W	S000005927	-0.97	3.905	1086.04	2	R.APYSTALVYN*ETSVSASVFR.T	940	1000	5	0.679196	Vacuolar membrane protein that transits through the biosynthetic vacuolar protein sorting pathway, involved in sphingolipid metabolism; glycoprotein and functional orthologue of human Niemann Pick C1 (NPC1) protein
NPP1	YCR026C	S000000621	-0.33	3.891	844.889	2	K.AATHMWPGSDVN*YTK.Y	296	1000	9	0.60036	Nucleotide pyrophosphatase/phosphodiesterase family member; mediates extracellular nucleotide phosphate hydrolysis along with Npp2p and Pho5p; activity and expression enhanced during conditions of phosphate starvation
OSM1	YJR051W	S000003812	0.99	4.704	955.935	2	K.VYEN*YTNNINFYMSK.N	355	73.311	9	0.542276	Fumarate reductase, catalyzes the reduction of fumarate to succinate, required for the reoxidation of intracellular NADH under anaerobic conditions; mutations cause osmotic sensitivity
OST1	YJL002C	S000003539	5.6	4.119	1076.02	2	R.FPIFGGWNYN*FTVGWTNK.L	336	17.009	1	0.855299	Alpha subunit of the oligosaccharyltransferase complex of the ER lumen, which catalyzes asparagine-linked glycosylation of newly synthesized proteins
OST1	YJL002C	S000003539	0	3.698	949.166	3	R.FSSN*ETLAIVYSHNAPLNQVVNLRR.D	217	45.598	2	0.686747	Alpha subunit of the oligosaccharyltransferase complex of the ER lumen, which catalyzes asparagine-linked glycosylation of newly synthesized proteins
PDC6	YGR087C	S000003319	0.1	4.068	1003.96	2	R.WAGN*ANELNAAYAADGYAR.I	48	17.009	1	1.14902	Minor isoform of pyruvate decarboxylase, decarboxylates pyruvate to acetaldehyde, involved in amino acid catabolism; transcription is glucose- and ethanol-dependent, and is strongly induced during sulfur limitation
PDC6	YGR087C	S000003319	3.48	4.677	1000.96	2	R.WAGNANELN*AAYAADGYAR.I	53	24.243	1	0.147542	Minor isoform of pyruvate decarboxylase, decarboxylates pyruvate to acetaldehyde, involved in amino acid catabolism; transcription is glucose- and ethanol-dependent, and is strongly induced during sulfur limitation
PDI1	YCL043C	S000000548	0.77	4.739	855.883	2	K.IDADFN*ATFYSMANK.H	174	171.488	138	0.699284	Protein disulfide isomerase, multifunctional protein resident in the endoplasmic reticulum lumen, essential for the formation of disulfide bonds in secretory and cell-surface proteins, unscrambles non-native disulfide bonds
PDI1	YCL043C	S000000548	0.37	4.652	1075.25	3	K.QSQPAVAVVADLPAYLAN*ETFVTPVIVQSGK.I	155	1000	9	0.691452	Protein disulfide isomerase, multifunctional protein resident in the endoplasmic reticulum lumen, essential for the formation of disulfide bonds in secretory and cell-surface proteins, unscrambles non-native disulfide bonds
PDI1	YCL043C	S000000548	0.75	3.501	1090.51	3	K.N*ITLAQIDCTENQDLCMEHNIPGFPSLK.I	82	78.964	10	0.586092	Protein disulfide isomerase, multifunctional protein resident in the endoplasmic reticulum lumen, essential for the formation of disulfide bonds in secretory and cell-surface proteins, unscrambles non-native disulfide bonds
PDI1	YCL043C	S000000548	-0.44	3.947	794.857	2	K.NSDVN*NSIDYEGPR.T	117	24.437	5	0.525441	Protein disulfide isomerase, multifunctional protein resident in the endoplasmic reticulum lumen, essential for the formation of disulfide bonds in secretory and cell-surface proteins, unscrambles non-native disulfide bonds
PDI1	YCL043C	S000000548	2.25	5.04	1236.13	2	R.LAPTYQELADTYAN*ATSDVLIAK.L	425	1000	58	0.405114	Protein disulfide isomerase, multifunctional protein resident in the endoplasmic reticulum lumen, essential for the formation of disulfide bonds in secretory and cell-surface proteins, unscrambles non-native disulfide bonds
PDR15	YDR406W	S000002814	-2.55	3.046	1256.61	2	R.RFPCAQYIPAGPAYQN*ITGTQR.V	744	1000	6	0.546844	Plasma membrane ATP binding cassette (ABC) transporter, multidrug transporter and general stress response factor implicated in cellular detoxification; regulated by Pdr1p, Pdr3p and Pdr8p; promoter contains a PDR responsive element
PEP1	YBL017C	S000000113	0.25	3.405	612.631	3	K.SNSN*GTSFVTLEHAVNR.N	1010	37.54	8	0.680563	Type I transmembrane sorting receptor for multiple vacuolar hydrolases; cycles between the late-Golgi and prevacuolar endosome-like compartments
PEP1	YBL017C	S000000113	-0.3	4.761	1010.48	2	R.AVATAMN*GSYLYITNDQGK.S	96	132.105	6	0.598387	Type I transmembrane sorting receptor for multiple vacuolar hydrolases; cycles between the late-Golgi and prevacuolar endosome-like compartments
PHO11	YAR071W	S000000094	-0.37	2.195	507.765	2	K.HYN*DTLLK.Q	461	1000	1	0.340046	One of three repressible acid phosphatases, a glycoprotein that is transported to the cell surface by the secretory pathway; induced by phosphate starvation and coordinately regulated by PHO4 and PHO2
PHO11	YAR071W	S000000094	-0.13	3.261	649.787	2	K.FQCSN*DTYVR.Y	390	1000	5	0.318287	One of three repressible acid phosphatases, a glycoprotein that is transported to the cell surface by the secretory pathway; induced by phosphate starvation and coordinately regulated by PHO4 and PHO2
PHO3	YBR092C	S000000296	2.8	1.649	1476.67	2	R.EFLAQYGYMFEN*QTSFPIFAASSER.V	162	1000	191	0.461691	Constitutively expressed acid phosphatase similar to Pho5p; brought to the cell surface by transport vesicles; hydrolyzes thiamin phosphates in the periplasmic space, increasing cellular thiamin uptake; expression is repressed by thiamin
PHO3	YBR092C	S000000296	0.53	3.535	619.338	2	R.SVGANLFN*ATLK.L	315	37.54	5	0.34329	Constitutively expressed acid phosphatase similar to Pho5p; brought to the cell surface by transport vesicles; hydrolyzes thiamin phosphates in the periplasmic space, increasing cellular thiamin uptake; expression is repressed by thiamin
PHO3	YBR092C	S000000296	-0.2	1.731	378.692	2	K.LSN*YTR.Q	97	1000	3	0.316066	Constitutively expressed acid phosphatase similar to Pho5p; brought to the cell surface by transport vesicles; hydrolyzes thiamin phosphates in the periplasmic space, increasing cellular thiamin uptake; expression is repressed by thiamin
PHO3	YBR092C	S000000296	0.17	1.937	368.21	2	K.GLN*LTSK.D	250	1000	1	0.281362	Constitutively expressed acid phosphatase similar to Pho5p; brought to the cell surface by transport vesicles; hydrolyzes thiamin phosphates in the periplasmic space, increasing cellular thiamin uptake; expression is repressed by thiamin
PHO8	YDR481C	S000002889	-0.16	4.214	1036.85	3	R.QVTASYPQYVWYPQVLAN*ATHSGEFLK.R	401	1000	2	0.58269	Repressible alkaline phosphatase, a glycoprotein localized to the vacuole; regulated by levels of inorganic phosphate and by a system consisting of Pho4p, Pho9p, Pho80p, Pho81p and Pho85p; dephosphorylates phosphotyrosyl peptides
PLB1	YMR008C	S000004610	-0.84	3.003	991.174	3	R.QFGSQGLN*LSFPYVPDVNTFVNLGLNK.K	459	97.565	4	0.86802	Phospholipase B (lysophospholipase) involved in lipid metabolism, required for deacylation of phosphatidylcholine and phosphatidylethanolamine but not phosphatidylinositol
PLB1	YMR008C	S000004610	-0.16	2.372	639.298	2	R.HSFNGN*QSTFK.M	513	30.835	2	0.614954	Phospholipase B (lysophospholipase) involved in lipid metabolism, required for deacylation of phosphatidylcholine and phosphatidylethanolamine but not phosphatidylinositol
PLB1	YMR008C	S000004610	6.88	4.191	765.388	2	K.DAGFN*ISLADVWGR.A	215	1000	4	0.523895	Phospholipase B (lysophospholipase) involved in lipid metabolism, required for deacylation of phosphatidylcholine and phosphatidylethanolamine but not phosphatidylinositol
PLB1	YMR008C	S000004610	1.12	3.265	745.072	3	R.N*LTDLEYIPPLIVYIPNSR.H	489	68.171	1	0.494931	Phospholipase B (lysophospholipase) involved in lipid metabolism, required for deacylation of phosphatidylcholine and phosphatidylethanolamine but not phosphatidylinositol
PLB1	YMR008C	S000004610	-0.34	3.917	791.362	2	R.EASGLSDN*ETEWLK.K	52	1000	5	0.354412	Phospholipase B (lysophospholipase) involved in lipid metabolism, required for deacylation of phosphatidylcholine and phosphatidylethanolamine but not phosphatidylinositol
PLB2	YMR006C	S000004608	-0.19	3.663	762.418	2	K.YLGTN*VTNGKPVNK.D	309	37.54	4	0.606004	Phospholipase B (lysophospholipase) involved in phospholipid metabolism; displays transacylase activity in vitro; overproduction confers resistance to lysophosphatidylcholine
PLB2	YMR006C	S000004608	0.53	1.778	515.232	2	K.MNYN*VTER.L	524	48.874	6	0.433424	Phospholipase B (lysophospholipase) involved in phospholipid metabolism; displays transacylase activity in vitro; overproduction confers resistance to lysophosphatidylcholine
PLB2	YMR006C	S000004608	-0.09	3.431	1103.1	2	K.N*LTDLEYIPPLVVYIPNTK.H	491	84.498	1	0.39472	Phospholipase B (lysophospholipase) involved in phospholipid metabolism; displays transacylase activity in vitro; overproduction confers resistance to lysophosphatidylcholine
PLB2	YMR006C	S000004608	-0.1	5.046	830.911	2	K.SDAGFN*ISLSDLWAR.A	217	1000	2	0.378693	Phospholipase B (lysophospholipase) involved in phospholipid metabolism; displays transacylase activity in vitro; overproduction confers resistance to lysophosphatidylcholine
PLB2	YMR006C	S000004608	0.38	4.442	862.441	2	K.SIVNPGGSN*LTYTIER.W	193	81.692	7	0.371234	Phospholipase B (lysophospholipase) involved in phospholipid metabolism; displays transacylase activity in vitro; overproduction confers resistance to lysophosphatidylcholine
PLB2	YMR006C	S000004608	2.16	2.974	799.891	2	K.QESLN*ATLPPECTK.C	567	1000	9	0.296664	Phospholipase B (lysophospholipase) involved in phospholipid metabolism; displays transacylase activity in vitro; overproduction confers resistance to lysophosphatidylcholine
PLB3	YOL011W	S000005371	0.11	3.615	764.403	2	K.YLGTN*VSNGVPLER.G	313	24.243	1	1.9964	Phospholipase B (lysophospholipase) involved in phospholipid metabolism; hydrolyzes phosphatidylinositol and phosphatidylserine and displays transacylase activity in vitro
PLB3	YOL011W	S000005371	0.06	4.063	729.846	2	R.ATAN*FSDSSEVLSK.L	82	1000	2	1.69537	Phospholipase B (lysophospholipase) involved in phospholipid metabolism; hydrolyzes phosphatidylinositol and phosphatidylserine and displays transacylase activity in vitro
PLB3	YOL011W	S000005371	0.76	3.925	866.91	2	K.QNADYN*TSLADIWGR.A	221	31.275	1	1.14528	Phospholipase B (lysophospholipase) involved in phospholipid metabolism; hydrolyzes phosphatidylinositol and phosphatidylserine and displays transacylase activity in vitro
PLB3	YOL011W	S000005371	-0.79	5.032	1067.49	2	K.NYCWN*GTLDTTPLPDVEK.D	588	42.098	2	1.03304	Phospholipase B (lysophospholipase) involved in phospholipid metabolism; hydrolyzes phosphatidylinositol and phosphatidylserine and displays transacylase activity in vitro
PLB3	YOL011W	S000005371	-0.34	3.471	465.592	3	R.IN*STHLPSFITR.L	351	1000	1	0.920634	Phospholipase B (lysophospholipase) involved in phospholipid metabolism; hydrolyzes phosphatidylinositol and phosphatidylserine and displays transacylase activity in vitro
PMT2	YAL023C	S000000021	-0.24	4.236	1280.12	2	R.GLPSWSEN*ETDIEYLKPGTSYR.L	403	1000	2	0.804492	Protein O-mannosyltransferase, transfers mannose residues from dolichyl phosphate-D-mannose to protein serine/threonine residues; acts in a complex with Pmt1p, can instead interact with Pmt5p in some conditions; target for new antifungals
PMT3	YOR321W	S000005848	0.46	1.851	628.792	2	R.GVEPWTDAEN*K.T	398	1000	8	0.876059	Protein O-mannosyltransferase, transfers mannose residues from dolichyl phosphate-D-mannose to protein serine/threonine residues; acts in a complex with Pmt5p, can instead interact with Pmt1p in some conditions; target for new antifungals
PMT6	YGR199W	S000003431	0.42	4.247	768.376	2	R.SSGLELDQN*GTLNGK.I	404	76.733	4	0.693275	Protein O-mannosyltransferase, transfers mannose from dolichyl phosphate-D-mannose to protein serine/threonine residues of secretory proteins; reaction is essential for cell wall rigidity; member of a family of mannosyltransferases
POM152	YMR129W	S000004736	0.87	2.315	625.32	2	K.IMN*VTTDSLTK.V	569	1000	3	0.963462	Nuclear pore membrane glycoprotein; may be involved in duplication of nuclear pores and nuclear pore complexes during S-phase;
POM152	YMR129W	S000004736	2.24	2.938	952.459	2	R.IN*STEEIEYIELEYR.D	280	1000	3	0.682641	Nuclear pore membrane glycoprotein; may be involved in duplication of nuclear pores and nuclear pore complexes during S-phase;
PRC1	YMR297W	S000004912	0.47	4.044	946.496	2	K.VRN*WTASITDEVAGEVK.S	479	1000	4	0.759804	Vacuolar carboxypeptidase Y (proteinase C), broad-specificity C-terminal exopeptidase involved in non-specific protein degradation in the vacuole; member of the serine carboxypeptidase family
PRY3	YJL078C	S000003614	1.25	3.46	817.71	3	K.YN*YSNPGFSESTGHFTQVVWK.S	101	59.298	3	0.363367	Protein of unknown function, has similarity to Pry1p and Pry2p and to the plant PR-1 class of pathogen related proteins
PST1	YDR055W	S000002462	8.26	4.568	1034.05	2	K.INSSLGFIN*NSISSLNFTK.L	235	24.437	1	129.481	Cell wall protein that contains a putative GPI-attachment site; secreted by regenerating protoplasts; up-regulated by activation of the cell integrity pathway, as mediated by Rlm1p; upregulated by cell wall damage via disruption of FKS1
PST1	YDR055W	S000002462	0.49	4.039	760.898	2	R.CDTLVGN*LTIGGGLK.T	57	1000	1	3.88254	Cell wall protein that contains a putative GPI-attachment site; secreted by regenerating protoplasts; up-regulated by activation of the cell integrity pathway, as mediated by Rlm1p; upregulated by cell wall damage via disruption of FKS1
PST1	YDR055W	S000002462	3.49	5.392	1094.52	2	K.SPVETVSDSLQFSFNGN*QTK.I	196	30.835	5	2.34177	Cell wall protein that contains a putative GPI-attachment site; secreted by regenerating protoplasts; up-regulated by activation of the cell integrity pathway, as mediated by Rlm1p; upregulated by cell wall damage via disruption of FKS1
PST1	YDR055W	S000002462	-0.39	2.864	569.762	2	K.SSN*FSCNALK.A	329	97.748	5	1.37468	Cell wall protein that contains a putative GPI-attachment site; secreted by regenerating protoplasts; up-regulated by activation of the cell integrity pathway, as mediated by Rlm1p; upregulated by cell wall damage via disruption of FKS1
RAX2	YLR084C	S000004074	2.27	5.059	1397.69	2	K.WTPYFISETTN*TSNYNPIIFINR.D	1098	37.54	6	0.508229	N-glycosylated protein involved in the maintenance of bud site selection during bipolar budding; localization requires Rax1p
RAX2	YLR084C	S000004074	-2.96	3.767	653.367	2	K.VGN*TTLNLFPVK.N	626	97.748	5	0.505226	N-glycosylated protein involved in the maintenance of bud site selection during bipolar budding; localization requires Rax1p
RAX2	YLR084C	S000004074	-1.08	2.009	703.321	2	K.N*SSLYADIYDNK.L	640	148.399	2	0.457534	N-glycosylated protein involved in the maintenance of bud site selection during bipolar budding; localization requires Rax1p
RAX2	YLR084C	S000004074	-0.47	2.351	471.912	3	K.N*QTIQGDVHGITK.T	677	1000	5	0.453822	N-glycosylated protein involved in the maintenance of bud site selection during bipolar budding; localization requires Rax1p
RNY1	YPL123C	S000006044	4.33	3.327	1139.49	2	K.GGDGYIGYSGN*YNWGGDTYPR.R	396	17.009	1	2.1667	RNAse; member of the T(2) family of endoribonucleases
RNY1	YPL123C	S000006044	1.04	3.553	785.368	2	K.FNNN*DTSLQISGEK.L	123	24.437	1	0.966539	RNAse; member of the T(2) family of endoribonucleases
RNY1	YPL123C	S000006044	0.06	3.014	593.302	2	K.NDLN*ETELVK.E	70	61.092	3	0.694189	RNAse; member of the T(2) family of endoribonucleases
ROT1	YMR200W	S000004813	-5.07	4.842	1261.61	3	R.NPTCPMASLIYQHGTYNISEN*GTLVLNPIEVDGR.Q	107	43.066	1	1.62586	Essential ER membrane protein; may be involved in protein folding; mutation causes defects in cell wall synthesis and in lysis of autophagic bodies, suppresses tor2 mutations, and is synthetically lethal with kar2-1 and with rot2 mutations
ROT1	YMR200W	S000004813	-0.22	1.797	517.24	2	R.YN*QTETFK.E	139	1000	5	1.23114	Essential ER membrane protein; may be involved in protein folding; mutation causes defects in cell wall synthesis and in lysis of autophagic bodies, suppresses tor2 mutations, and is synthetically lethal with kar2-1 and with rot2 mutations
ROT2	YBR229C	S000000433	-1.04	3.864	895.97	2	K.ERMPTN*SSGLLISSQR.F	114	1000	25	1.11234	Glucosidase II catalytic subunit required for normal cell wall synthesis; mutations in rot2 suppress tor2 mutations, and are synthetically lethal with rot1 mutations
ROT2	YBR229C	S000000433	-0.61	1.661	418.201	2	R.FN*ETWK.Y	126	1000	4	0.875027	Glucosidase II catalytic subunit required for normal cell wall synthesis; mutations in rot2 suppress tor2 mutations, and are synthetically lethal with rot1 mutations
ROT2	YBR229C	S000000433	2.32	2.568	669.014	3	K.ISSFLSLSN*STADTFHLR.N	173	1000	2	0.708063	Glucosidase II catalytic subunit required for normal cell wall synthesis; mutations in rot2 suppress tor2 mutations, and are synthetically lethal with rot1 mutations
ROT2	YBR229C	S000000433	2.27	4.317	967.969	2	R.GEYVETQFIFEN*NTLK.N	867	24.437	1	0.671565	Glucosidase II catalytic subunit required for normal cell wall synthesis; mutations in rot2 suppress tor2 mutations, and are synthetically lethal with rot1 mutations
ROT2	YBR229C	S000000433	0.35	2.163	603.335	2	K.NNLQHN*ITLK.D	907	44.278	6	0.633449	Glucosidase II catalytic subunit required for normal cell wall synthesis; mutations in rot2 suppress tor2 mutations, and are synthetically lethal with rot1 mutations
SIP18	YMR175W	S000004787	3.21	1.027	532.941	4	R.DDMN*MDMGMGHDQSEGGMK.M	36	1000	3	1.66405	Protein of unknown function whose expression is induced by osmotic stress
SKN1	YGR143W	S000003375	6.8	5.062	1128.56	2	K.DLEWYSPDAVTTTN*GTLTLR.M	426	1000	3	1.27253	Protein involved in sphingolipid biosynthesis; type II membrane protein with similarity to Kre6p
SLN1	YIL147C	S000001409	0.72	4.472	923.8	3	K.SVFN*DTTALEHSTIAIISAVYNSQGK.A	224	74.853	2	1.43063	Histidine kinase osmosensor that regulates a MAP kinase cascade; transmembrane protein with an intracellular kinase domain that signals to Ypd1p and Ssk1p, thereby forming a phosphorelay system similar to bacterial two-component regulators
SLN1	YIL147C	S000001409	1.5	2.975	583.649	3	K.VFSIKN*DTFISSAFR.N	272	1000	2	1.04739	Histidine kinase osmosensor that regulates a MAP kinase cascade; transmembrane protein with an intracellular kinase domain that signals to Ypd1p and Ssk1p, thereby forming a phosphorelay system similar to bacterial two-component regulators
SOP4	YJL192C	S000003728	0.08	3.56	736.89	2	K.NLEN*GTLQLNAFK.N	115	42.098	3	0.975626	ER-membrane protein; suppressor of pma1-7, deletion of SOP4 slows down the export of wild-type Pma1p and Pma1-7 from the ER
SOP4	YJL192C	S000003728	-1.17	2.364	784.413	2	R.LDLAASN*ITGFVSTR.T	35	1000	3	0.781545	ER-membrane protein; suppressor of pma1-7, deletion of SOP4 slows down the export of wild-type Pma1p and Pma1-7 from the ER
STE13	YOR219C	S000005745	0.28	3.327	592.77	2	R.FN*DTSVDDIR.L	377	1000	2	1.47258	Dipeptidyl aminopeptidase, Golgi integral membrane protein that cleaves on the carboxyl side of repeating -X-Ala- sequences, required for maturation of alpha factor, transcription is induced by a-factor
STE13	YOR219C	S000005745	2.25	4.844	1235.08	2	K.YAMAVAPVTN*WTLYDSVYTER.Y	814	1000	9	0.372394	Dipeptidyl aminopeptidase, Golgi integral membrane protein that cleaves on the carboxyl side of repeating -X-Ala- sequences, required for maturation of alpha factor, transcription is induced by a-factor
STT3	YGL022W	S000002990	-0.37	3.368	708.035	3	R.TTLVDNNTWN*NTHIAIVGK.A	539	17.009	3	0.760384	Subunit of the oligosaccharyltransferase complex of the ER lumen, which catalyzes asparagine-linked glycosylation of newly synthesized proteins; forms a subcomplex with Ost3p and Ost4p and is directly involved in catalysis
SUC2	YIL162W	S000001424	-0.46	3.569	830.93	2	K.NPVLAAN*STQFRDPK.V	165	65.44	2	0.421469	Invertase, sucrose hydrolyzing enzyme; a secreted, glycosylated form is regulated by glucose repression, and an intracellular, nonglycosylated enzyme is produced constitutively
SUC2	YIL162W	S000001424	4.53	3.677	814.424	2	K.AEPILN*ISNAGPWSR.F	356	53.534	1	0.0338711	Invertase, sucrose hydrolyzing enzyme; a secreted, glycosylated form is regulated by glucose repression, and an intracellular, nonglycosylated enzyme is produced constitutively
SUR7	YML052W	S000004516	0.18	5.328	1064.99	2	R.FYWVQGN*TTGIPNAGDETR.W	47	104.477	5	0.559962	Putative integral membrane protein; component of eisosomes; associated with endocytosis, along with Pil1p and Lsp1p; sporulation and plasma membrane sphingolipid content are altered in mutants
TDH3	YGR192C	S000003424	0.08	4.079	1063.55	3	R.IALSRPNVEVVALN*DPFITNDYAAYMFK.Y	32	35.356	1	1.55369	Glyceraldehyde-3-phosphate dehydrogenase, isozyme 3, involved in glycolysis and gluconeogenesis; tetramer that catalyzes the reaction of glyceraldehyde-3-phosphate to 1,3 bis-phosphoglycerate; detected in the cytoplasm and cell-wall
TDH3	YGR192C	S000003424	0.32	4.394	1058.87	3	R.IALSRPNVEVVALNDPFITN*DYAAYMFK.Y	38	19.777	1	1.55369	Glyceraldehyde-3-phosphate dehydrogenase, isozyme 3, involved in glycolysis and gluconeogenesis; tetramer that catalyzes the reaction of glyceraldehyde-3-phosphate to 1,3 bis-phosphoglycerate; detected in the cytoplasm and cell-wall
TDH3	YGR192C	S000003424	4.94	2.991	868.111	3	K.VIN*DAFGIEEGLMTTVHSLTATQK.T	163	1000	1	1.46206	Glyceraldehyde-3-phosphate dehydrogenase, isozyme 3, involved in glycolysis and gluconeogenesis; tetramer that catalyzes the reaction of glyceraldehyde-3-phosphate to 1,3 bis-phosphoglycerate; detected in the cytoplasm and cell-wall
TED1	YIL039W	S000001301	-1.18	4.937	1067.48	2	K.DNYWIEYETN*TTHPWR.I	266	183.277	6	0.795371	Conserved phosphoesterase domain-containing protein that acts together with Emp24p/Erv25p in cargo exit from the ER; deletion confers sensitivity to 4-(N-(S-glutathionylacetyl)amino) phenylarsenoxide (GSAO)
TED1	YIL039W	S000001301	0.5	4.423	618.673	3	R.KFN*GSTVLLTHVPFYK.R	307	1000	7	0.605626	Conserved phosphoesterase domain-containing protein that acts together with Emp24p/Erv25p in cargo exit from the ER; deletion confers sensitivity to 4-(N-(S-glutathionylacetyl)amino) phenylarsenoxide (GSAO)
TPS2	YDR074W	S000002481	9	4.719	899.442	4	R.LEQQVNELVNSINSEYGN*LNFSPVQHYYMR.I	412	22.529	1	3.21474	Phosphatase subunit of the trehalose-6-phosphate synthase/phosphatase complex, which synthesizes the storage carbohydrate trehalose; expression is induced by stress conditions and repressed by the Ras-cAMP pathway
TRE1	YPL176C	S000006097	-1.72	5.065	1133.51	2	R.LAGEEEFMAYSNYPGN*VSLR.V	213	76.733	4	0.310024	Plasma membrane protein that binds to Bsd2p and regulates ubiquitylation and vacuolar degradation of the metal transporter Smf1p; function is redundant with that of Tre2p; has similarity to transferrin receptors
TUL1	YKL034W	S000001517	0.91	5.02	1190.59	2	K.LSYQDMLNNPLQN*ATYPLPGK.D	79	59.298	6	1.04638	Golgi-localized RING-finger ubiquitin ligase (E3), involved in ubiquitinating and sorting membrane proteins that contain polar transmembrane domains to multivesicular bodies for delivery to the vacuole for quality control purposes
TUL1	YKL034W	S000001517	3.36	4.935	1350.71	3	K.LIDDELNWPLGRPAN*LSSLPPINVVSGLLYSPDCGVR.L	356	42.869	1	0.101061	Golgi-localized RING-finger ubiquitin ligase (E3), involved in ubiquitinating and sorting membrane proteins that contain polar transmembrane domains to multivesicular bodies for delivery to the vacuole for quality control purposes
UTR2	YEL040W	S000000766	1.19	2.445	565.289	3	R.TLYKN*ETYNATTQK.Y	233	18.805	1	55.4686	Cell wall protein that functions in the transfer of chitin to beta(1-6)glucan; putative chitin transglycosidase; glycosylphosphatidylinositol (GPI)-anchored protein localized to the bud neck; has a role in cell wall maintenance
VAN1	YML115C	S000004583	0.86	5.113	866.113	3	R.HLQN*GTLSQIFQEIDAVIDSQTK.G	251	1000	3	0.83024	Component of the mannan polymerase I, which contains Van1p and Mnn9p and is involved in the first steps of mannan synthesis; mutants are vanadate-resistant
VTH1	YIL173W	S000001435	0.11	4.995	910.795	3	R.LVHN*STGLYTTGDLGNIIMYIPYR.S	479	44.612	2	0.443298	Putative membrane glycoprotein with strong similarity to Vth2p and Pep1p/Vps10p, may be involved in vacuolar protein sorting
WBP1	YEL002C	S000000728	-0.53	2.573	1407.17	2	R.LTLSPSGN*DSETQYYTTGEFILPDR.H	332	1000	4	0.641291	Beta subunit of the oligosaccharyl transferase (OST) glycoprotein complex; required for N-linked glycosylation of proteins in the endoplasmic reticulum
WBP1	YEL002C	S000000728	4.47	6.134	1249.61	2	R.NYKLEYLDIN*STSTTVDLYDK.E	60	158.84	2	0.505208	Beta subunit of the oligosaccharyl transferase (OST) glycoprotein complex; required for N-linked glycosylation of proteins in the endoplasmic reticulum
YBR074W	YBR074W	S000000278	3.08	3.792	902.941	2	R.SILFQQQDPFN*ESSR.F	121	1000	4	0.546048	Putative metalloprotease
YBR074W	YBR074W	S000000278	4.85	5.987	1161.56	3	R.TLIFNFNNNEEFGLLGASTYFDHSWSN*LTK.Y	217	99.844	1	0.525514	Putative metalloprotease
YBR074W	YBR074W	S000000278	0.34	4.581	643.322	3	K.RVLEITGN*SSFASVSDDK.E	96	1000	1	0.303612	Putative metalloprotease
YBR139W	YBR139W	S000000343	0.42	4.553	1121.53	3	R.TFN*LTSVMIGNGITDPLIQADYYEPMACGK.G	242	21.528	2	0.755289	Putative serine type carboxypeptidase with a role in phytochelatin synthesis; green fluorescent protein (GFP)-fusion protein localizes to the vacuole; expression induced by nitrogen limitation in a GLN3, GAT1-independent manner
YBR139W	YBR139W	S000000343	1.43	3.751	976.373	2	R.GPCEDN*STDGMCYTGLR.Y	339	1000	14	0.603698	Putative serine type carboxypeptidase with a role in phytochelatin synthesis; green fluorescent protein (GFP)-fusion protein localizes to the vacuole; expression induced by nitrogen limitation in a GLN3, GAT1-independent manner
YCL045C	YCL045C	S000000550	-0.76	2.05	953.133	3	R.LSN*SSDNFSYDPLTGHINKPQFQTK.Q	574	40.978	1	3.80527	Protein of unknown function; green fluorescent protein (GFP)-fusion protein localizes to the ER; interacts with Gal80p; YCL045C is not an essential gene
YCR061W	YCR061W	S000000657	-2.04	5.565	1173.53	2	R.LYWENYN*TTTYFTTQAGNR.S	87	48.874	3	0.121371	Protein of unknown function; green fluorescent protein (GFP)-fusion protein localizes to the cytoplasm in a punctate pattern; induced by treatment with 8-methoxypsoralen and UVA irradiation
YFR018C	YFR018C	S000001914	0.86	1.944	495.287	2	K.NLLLPFN*R.T	63	47.808	1	0.473029	Putative protein of unknown function
YFR018C	YFR018C	S000001914	-1.56	5.346	1040.5	2	K.EYNDLESNTVVSN*STLGVK.I	179	81.692	3	0.450594	Putative protein of unknown function
YGP1	YNL160W	S000005104	-0.43	4.94	1011.03	2	R.LFNSSSALN*ITELYNVAR.V	106	57.711	3	6.81163	Cell wall-related secretory glycoprotein; induced by nutrient deprivation-associated growth arrest and upon entry into stationary phase; may be involved in adaptation prior to stationary phase entry; has similarity to Sps100p
YGP1	YNL160W	S000005104	0.16	3.241	528.781	2	R.VVN*ETIQDK.S	118	1000	6	0.574588	Cell wall-related secretory glycoprotein; induced by nutrient deprivation-associated growth arrest and upon entry into stationary phase; may be involved in adaptation prior to stationary phase entry; has similarity to Sps100p
YJL171C	YJL171C	S000003707	0.32	1.978	826.358	3	K.DITNN*ESCTCEVGDRVWFSGK.N	51	24.437	1	0.944289	GPI-anchored cell wall protein of unknown function; induced in response to cell wall damaging agents and by mutations in genes involved in cell wall biogenesis; sequence similarity to YBR162C/TOS1, a covalently bound cell wall protein
YJL171C	YJL171C	S000003707	6.77	3.722	1261.14	2	K.N*SSSIGYYDLPAIWLLNDHIAR.T	219	138.848	3	0.69602	GPI-anchored cell wall protein of unknown function; induced in response to cell wall damaging agents and by mutations in genes involved in cell wall biogenesis; sequence similarity to YBR162C/TOS1, a covalently bound cell wall protein
YJL171C	YJL171C	S000003707	1.53	2.08	841.093	3	K.NSSSIGYYDLPAIWLLN*DHIAR.T	235	29.638	1	0.683399	GPI-anchored cell wall protein of unknown function; induced in response to cell wall damaging agents and by mutations in genes involved in cell wall biogenesis; sequence similarity to YBR162C/TOS1, a covalently bound cell wall protein
YLR001C	YLR001C	S000003991	-0.48	2.006	735.352	2	K.YLHGLN*CSEFVK.E	333	1000	7	0.885092	Putative protein of unknown function; the authentic, non-tagged protein is detected in highly purified mitochondria in high-throughput studies; YLR001C is not an essential gene
YLR001C	YLR001C	S000003991	-1.2	2.969	1108.99	2	K.SNSEGTSVSVN*NSDYSPISNR.I	291	24.437	3	0.661265	Putative protein of unknown function; the authentic, non-tagged protein is detected in highly purified mitochondria in high-throughput studies; YLR001C is not an essential gene
YLR001C	YLR001C	S000003991	0.36	1.679	485.781	2	K.IVGSQN*LTK.I	569	1000	1	0.526425	Putative protein of unknown function; the authentic, non-tagged protein is detected in highly purified mitochondria in high-throughput studies; YLR001C is not an essential gene
YLR001C	YLR001C	S000003991	-0.86	2.687	592.781	2	R.DLEN*GTYLEK.R	112	1000	3	0.496615	Putative protein of unknown function; the authentic, non-tagged protein is detected in highly purified mitochondria in high-throughput studies; YLR001C is not an essential gene
YLR001C	YLR001C	S000003991	-0.65	3.478	959.503	3	K.TGHVQYLNELQN*FTLFAPINSAFIK.G	68	18.805	1	0.428569	Putative protein of unknown function; the authentic, non-tagged protein is detected in highly purified mitochondria in high-throughput studies; YLR001C is not an essential gene
YLR413W	YLR413W	S000004405	-0.73	2.882	1043.24	3	K.VMPQVGPILTVLGSALTAPN*TTVDTIFGALK.A	72	1000	2	0.114729	Putative protein of unknown function; YLR413W is not an essential gene
YLR413W	YLR413W	S000004405	-0.63	4.618	946.5	2	K.ILNSAVN*MTTITPEQLK.E	429	76.733	7	0.102174	Putative protein of unknown function; YLR413W is not an essential gene
YLR413W	YLR413W	S000004405	0.03	2.292	1454.76	2	K.YVPYLFSLLAASSDPVSSFSSLVN*ITK.W	405	1000	3	0.0943653	Putative protein of unknown function; YLR413W is not an essential gene
YND1	YER005W	S000000807	-0.12	4.381	965.43	2	R.EFCNSN*WTQILANSDK.G	371	17.009	1	0.498374	Apyrase with wide substrate specificity, involved in preventing the inhibition of glycosylation by hydrolyzing nucleoside tri- and diphosphates which are inhibitors of glycotransferases; partially redundant with Gda1p
YNL217W	YNL217W	S000005161	0.73	3.756	682.04	3	K.IGGLGEN*ITMILLGDFIHK.G	90	1000	2	0.490508	Hypothetical protein
YNR048W	YNR048W	S000005331	1.46	2.913	902.937	2	K.TEYN*ASDIVPPPNWAK.L	240	53.71	1	0.685914	Protein proposed to interact with phospholipid translocases, shares similarity to Cdc50p
YNR048W	YNR048W	S000005331	0.39	4.421	1223.09	2	K.VAVQPQWMVLTDPELGN*QTCR.I	123	1000	1	0.685059	Protein proposed to interact with phospholipid translocases, shares similarity to Cdc50p
YOR389W	YOR389W	S000005916	0.02	2.706	517.252	3	K.EKLN*LTDDGENER.M	219	110.807	3	0.718719	Putative protein of unknown function; expression regulated by copper levels
YPS3	YLR121C	S000004111	-0.56	3.407	1000.45	3	K.TLGYYEYTCPSSDN*KTSVAFDFGGFR.I	328	1000	6	31.084	Aspartic protease, attached to the plasma membrane via a glycosylphosphatidylinositol (GPI) anchor
YPS3	YLR121C	S000004111	0.3	2.308	532.823	2	K.RN*ITLTTTK.L	275	1000	1	21.6276	Aspartic protease, attached to the plasma membrane via a glycosylphosphatidylinositol (GPI) anchor
YPS7	YDR349C	S000002757	0.37	4.21	832.384	2	R.GNYYVN*STFGTPGQR.Q	59	85.529	8	0.686961	Putative GPI-anchored aspartic protease, located in the cytoplasm and endoplasmic reticulum
YPS7	YDR349C	S000002757	1.34	2.786	1074.52	3	K.HPSYLMN*DSTSSVPVSPGQIYEISFIDGR.A	106	1000	3	0.227179	Putative GPI-anchored aspartic protease, located in the cytoplasm and endoplasmic reticulum
YUR1	YJL139C	S000003675	-0.53	3.526	764.327	2	R.NSYDDYTLN*YTR.Q	77	147.628	5	1.04016	Mannosyltransferase of the KTR1 family, involved in protein N-glycosylation; located in the Golgi apparatus
YUR1	YJL139C	S000003675	-1.15	2.396	1045.51	3	K.TQYALIPPEDWN*RPQWINDTLFEER.L	161	13.378	1	0.696309	Mannosyltransferase of the KTR1 family, involved in protein N-glycosylation; located in the Golgi apparatus
